# Supplementary material for: Mitochondrial redox adaptations enable alternative aspartate synthesis in SDH-deficient cells
Source: eLife journal article supplement (doi:10.7554/elife.78654), 2023-03-08
Supplement: supp [file Figure 1-figure supplement 1-source data 2.docx]

Figure 1-figure supplement 1

**Figure supplement 1B**

WT 143B and SLC1A3

WT SLC1A3


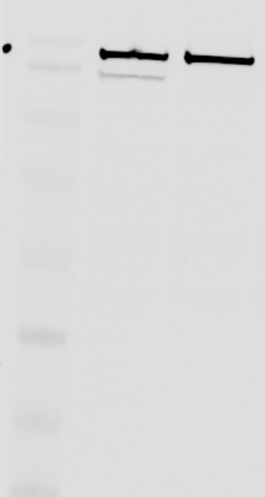

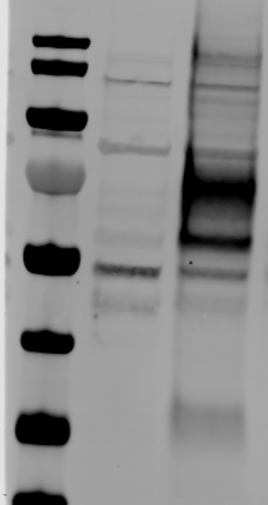


Vinculin

115 kDa

115 kDa

SLC1A3

60 kDa

680 channel

800 channel

Raw Image


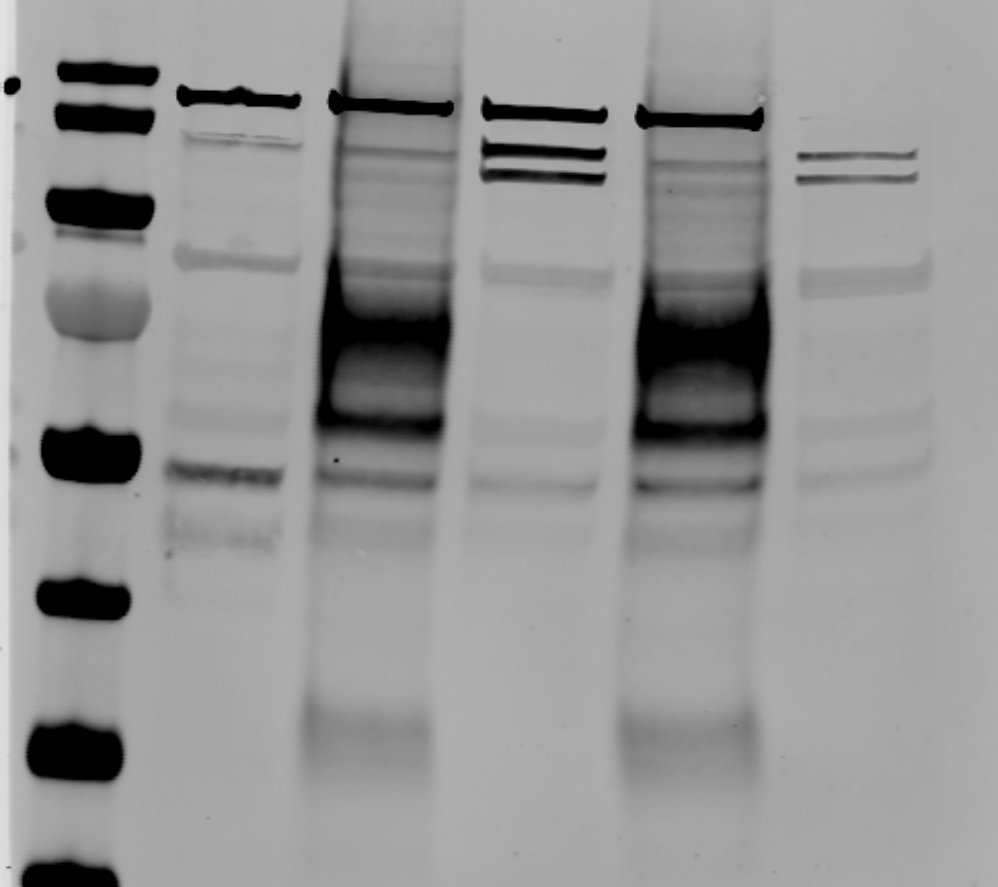


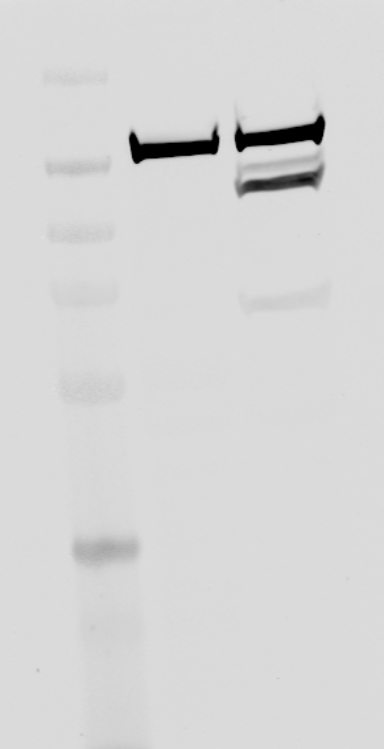

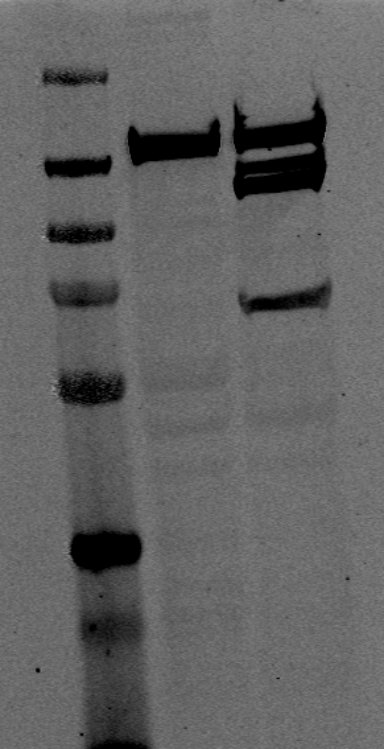

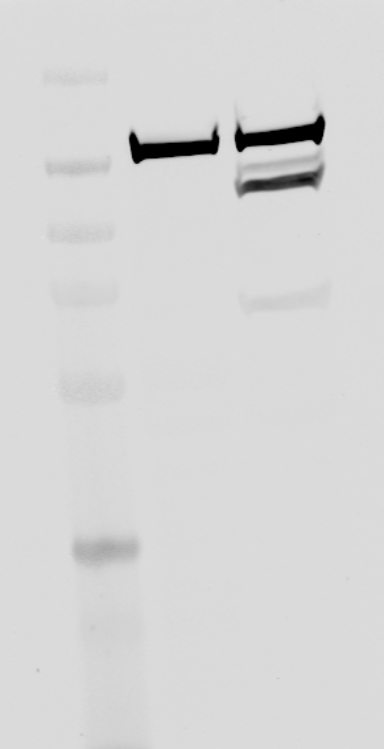

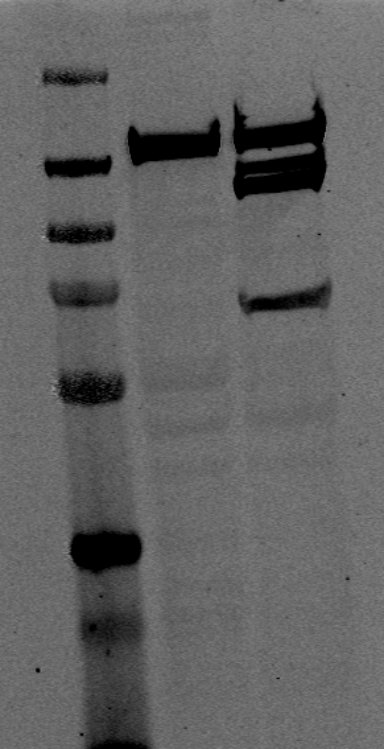


Lower exposure – 800 channel

**Figure 1- figure supplement 1F**

WT 143B vs gpASNase1 (FLAG) expressing 143B

FLAG

Vinculin

Vinculin

50 kDa

115 kDa

Raw Images
