# Supplementary material for: Mitochondrial redox adaptations enable alternative aspartate synthesis in SDH-deficient cells
Source: eLife journal article supplement (doi:10.7554/elife.78654), 2023-03-08
Supplement: supp [file Figure 1-figure supplement 1-source data.xlsx]

## Sheet: S1C
		WT		SLC1A3
	NT	0.00808001		0.00505063
	10 µM Asp	0.0282736		0.771718
	150 µM Asp	0.0477597	0.0474564	0.930338	0.940821
	1000 µM Asp	0.0936371	0.120662	0.959081	0.953992
		WT			SLC1A3
	NT	245047249			239696321
	10 µM Asp	116192689			778218670
	150 µM Asp	246047194	240971028		1337556706	1286086468
	1000 µM Asp	240971028	219957176		1388907900	1565408525

## Sheet: S1D
		-PYR			+PYR
	Vehicle	1.48127	1.35903	1.42271	1.4723	1.54747	1.44494
	Atpenin	0.0636732	0.0211444	-0.00479535	0.71332	0.790713	0.739061
	Atpenin + 1mM ASP	1.47681	1.24089	1.2675	1.32103	1.2801	1.3026

## Sheet: S1G
		eGFP			gpASNase1
	Vehicle	1.25935	1.28457	1.27861	1.28642	1.26613	1.24301
	ASN	1.34836	1.34034	1.33729	1.34121	1.215	1.2866
	AA5	0.35511	0.372129	0.425814	0.453209	0.391728	0.340714
	AA5+ASN	0.628018	0.480314	0.585446	1.03406	1.08494	1.05217

## Sheet: S1H
		Vehicle			AA5
	0	27040290	12458208	4030000000	4230000000	4340000000

## Sheet: S1I
		Vehicle			AA5
	6330886	5217735	7005926	4602	920023	0

## Sheet: S1J
				M+4 Aspartate
	Vehicle	Untr	0.825375	0.965666	1.20896
		PYR	4.21899	3.99169	4.11212
	Rotenone	Untr	0.00663017	0.00764566	0.00853769
		PYR	1.21378	1.30796	1.54772
	AA5	Untr	0.0403167	0.0208777	0.0511975
		PYR	0.0894196	0.0963131	0.077112

## Sheet: S1K
	See Fig 1C Source Data

## Sheet: S1L
		Relative Aspartate
DMSO +PYR	1.06819	0.999976	0.931834
0.1 nM Rot	0.767406	0.754794	0.756846
DMSO -PYR	0.772612	0.795544	0.617578
1.25 nM Rot	0.529689	0.541549	0.515316
3.125 nM Rot	0.593825	0.495981	0.404708
6.25 nM Rot	0.241961	0.275997	0.263393
12.5 nM Rot	0.163473	0.137093	0.202679
25 nM Rot	0.106144	0.13703	0.105638
50 nM Rot	0.064976	0.065596	0.06777
50 nM Rot +PYR	0.738162	0.744247	0.710087
5 uM AA5 -PYR	0.049626	0.04667	0.092874
5 uM AA5 +PYR	0.136765	0.130816	0.123917
	See Ion count supplement for raw counts

## Sheet: S1M
			Succinate
	WT	0.960605	1.15695	0.882445
	SDHB	0.321607	0.312897	0.346345
		Succinate levels were normalized to WT

## Sheet: S1N
				Aspartate
		WT	1.02154	1.02183	0.956626
		SDHB	4.08034	3.95335	4.48772
			Succinate levels were normalized to WT
