# Supplementary material for: Mitochondrial redox adaptations enable alternative aspartate synthesis in SDH-deficient cells
Source: eLife journal article supplement (doi:10.7554/elife.78654), 2023-03-08
Supplement: supp [file Figure 1-source data.xlsx]

## Sheet: 1A
	Vehicle			Rotenone			Atpenin
Untr	1.20221	1.15212	1.1796	-0.300631	-0.26666	-0.0730189	0.01	-0.07	-0.15
PYR	1.37935	1.35618	1.38266	1.26969	1.20565	1.25953	0.6	0.58	0.51
AKB	1.46326	1.40822	1.39933	1.18471	1.20393	1.27396	0.420105	0.529851	0.484856
ASP	1.46742	1.44082	1.43088	1.02393	1.04046	1.07729	1.05172	0.976242	1.03537

## Sheet: 1B
		DMSO			Rotenone			Atpenin
	NT	0.984262	0.996135	1.0196	0.0630455	0.0673568	0.0775394	0.0866508	0.100915	0.0926718
	PYR	1.51257	1.56745	1.61469	0.862437	0.922332	0.977863	0.181399	0.162606	0.172922
		Values were normalized to DMSO (Vehicle) Untr
		This occurs for all graphs showing aspartate levels unless otherwise indicated

## Sheet: 1C
	Treatment	Average Normalized ASP to DMSO +PYR	SD of column C		Proliferation Rates
	0.1 nM Rot	0.729069	0.0671438	1.32418	1.26912	1.26381
	DMSO -PYR	0.709892	0.00951256	1.27286	1.23865	1.20627
	1.25 nM Rot	0.565135	0.00336631	1.27583	1.26228	1.17599
	3.125 nM Rot	0.567614	0.062582	1.22513	1.09721	1.11288
	6.25 nM Rot	0.301156	0.0101827	0.95375	0.981869	0.996913
	12.5 nM Rot	0.189989	0.0254056	0.752002	0.749466	0.744341
	25 nM Rot	0.12511	0.00764341	0.353225	0.183326	0.375428
	50 nM Rot	0.07503	0.00225178	-0.0534702	-0.0992818	-0.197069
	50 nM Rot +PYR	0.758719	0.00562377	1.21791	1.08311	1.19442
	DMSO +PYR	1	0.0595848	1.44126	1.40388	1.39971
	5 uM AA5 -PYR	0.0670131	0.0179936	-0.221577	-0.215985	-0.213221
	5 uM AA5 +PYR	0.157269	0.00315405	0.337626	0.302053	0.428711
		See Ion Counts Supplementary File for Asp levels

## Sheet: 1D
		-PYR			+PYR
	DMSO	1.44832	1.37281	1.2539	1.66309	1.49793	1.56096
	Rotenone	0.452993	0.465729	0.46714	1.04805	0.996513	1.03645
	Atpenin	1.57435	1.4482	1.31921	3.28545	3.38464	3.63644

## Sheet: 1I
		Untreated			1 mM Pyr			20 mM Asp
	UOK269 WT	0.106562	0.162688	0.131422	0.392943	0.392213	0.447089	0.391774	0.43087	0.410684
	UOK269 + SDHB	0.477207	0.517457	0.503899	0.568003	0.563821	0.554183	0.523676	0.558953	0.544681
