# Supplementary material for: Mitochondrial redox adaptations enable alternative aspartate synthesis in SDH-deficient cells
Source: eLife journal article supplement (doi:10.7554/elife.78654), 2023-03-08
Supplement: supp [file Figure 2-figure supplement 1-source data.xlsx]

## Sheet: S1A
	Time (minutes)	Vehicle			AA5
	1.59334	288.526	274.151	275.432	134.816	128.445	135.447
	8.18317	258.095	251.928	255.215	119.272	110.359	118.155
	14.7828	244.394	240.381	243.743	113.376	104.071	111.456
	21.464	195.653	186.777	194.489	109.975	99.8848	109.281
	28.0606	178.092	169.049	174.519	105.48	95.4156	105.541
	34.6567	164.596	155.609	159.254	103.544	94.2269	104.159
	41.2632	150.579	140.694	143.19	102.266	92.9631	102.624
	47.9387	42.1429	30.9768	34.3882	22.4577	20.6891	22.9401
	54.5554	35.9633	28.1734	29.8633	22.2719	17.9699	21.6038
	61.1654	32.35	25.2775	26.9854	21.2147	17.1483	22.1408
	67.7924	30.1532	24.2258	26.1603	20.3102	17.7409	21.8774
	74.4787	4.30157	4.66227	5.42445	3.31829	2.09921	2.87297
	81.0939	4.00055	3.02943	3.59563	1.86672	2.12301	2.6366
	87.7076	0.151343	-0.02887	-0.537	0.056154	-0.46778	-0.46574
	94.3212	-4.15189	-3.00055	-3.05863	-1.92288	-1.65523	-2.17085

## Sheet: S1B
		Vehicle			AA5			AA5+Rotenone			AA5+Metformin
A549	1.03389	0.987179	0.963546	0.526965	0.470746	0.436971	0.746319	0.750167	0.715703	0.768071	0.775167	0.746964
HCT116	1.07	1.07	1.06	0.363	0.291	0.329	0.983	0.961	0.925
HEK293T	1.37452	1.4039	1.4248	0.526692	0.636441	0.545165	0.912957	1.01111	0.938947
TF-1	1.21401	1.24713	1.24449	0.788717	0.821196	0.856291	0.941919	0.934865	0.957839

## Sheet: S1C
		Vehicle			AA5			AA5+Rotenone
A549	1.03653	1.02369	0.939783	0.177464	0.104331	0.17925	0.356306	0.314205	0.363651
HCT116	1.09103	1.00939	0.899577	0.080816		0.0603331	0.121972	0.120299	0.132964
HEK293T	0.948375	1.06335	0.988275	0.258801	0.274172	0.276558	0.335721	0.363077	0.403106
TF-1	0.909	1.04	1.05	0.527	0.461	0.485	0.805	0.736	0.744
	One of the HCT116 AA5 samples was spilled and was excluded from analysis
	Aspartate levels for each cell line were normalized to their respective untreated condition

## Sheet: S2E-G
			Untr			AA5
S2E	Proliferation	0.432933	0.438259	0.43508	0.479999	0.496892	0.411937
S2F	Aspartate	70883771	84194742	68984536	64682220	64014125	59385941
S2G	NAD/NADH	1.37926	1.66398	1.48226	1.58194	1.85169	1.83088

## Sheet: S2H
		SB1			SB3			SB4			SB6
	Vehicle	0.613366	0.622254	0.614863	0.611891	0.610206	0.617545	0.563027	0.529369	0.559157	0.408172	0.445712	0.448367
	Rotenone	0.915466	0.9166	0.92142	0.9008	0.877684	0.873915	0.806678	0.847585	0.822845	0.828686	0.845178	0.814332
	Metformin	0.890617	0.893904	0.909082	0.86996	0.883245	0.864414	0.7733	0.806805	0.864103	0.835673	0.667533	0.828969
	Aspartate	0.856171	0.878599	0.926805	0.966908	1.0139	0.98773	0.858041	0.860079	0.826838	0.827126	0.808172	0.814183

## Sheet: S2J
			Vehicle			Rotenone			AA5			AA5+Rotenone
	SDHB AB	1.20343	1.2413	1.17704	1.05973	1.11008	1.11728	0.414929	0.338342	0.344852	0.861461	0.8113	0.820068

## Sheet: S2K
			Vehicle			Rotenone			AA5			AA5+Rotenone			AA5+ASP
		1.7542	1.57135	1.53232	1.21512	1.14849	1.18671	0.347392	0.276922	0.271866	0.913838	0.937384	0.869743	1.38167	1.45184	1.37932
