# Supplementary material for: Mitochondrial redox adaptations enable alternative aspartate synthesis in SDH-deficient cells
Source: eLife journal article supplement (doi:10.7554/elife.78654), 2023-03-08

NSB= non-specific band

**Figure 2-Figure supplement 1D**

WT and SDHB KO clones 1, 3-5

WT KO 1 KO 3 KO 4 KO 5


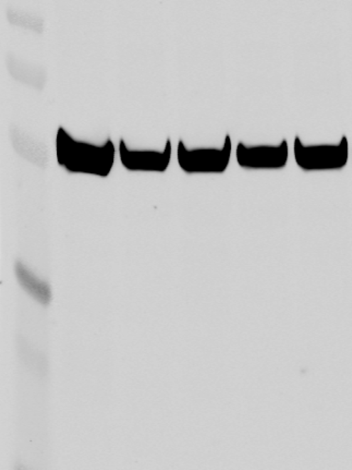

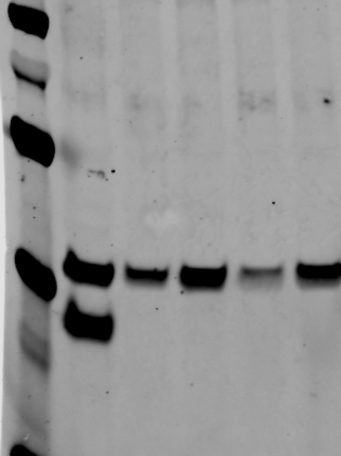


50 kDa

Tubulin

SDHB

NSB

30 kDa

Raw Image


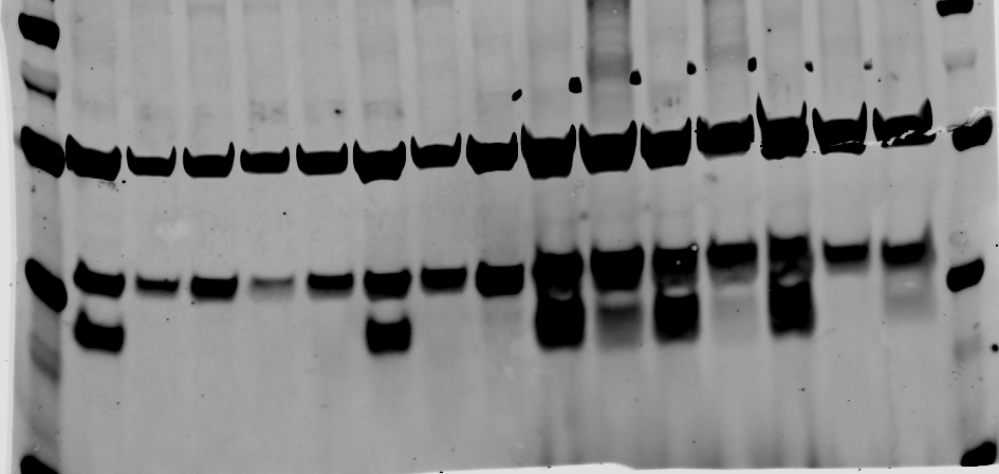


**Figure 2-Figure supplement 1I**

SDHB KO + AB (SDHB)

KO AB


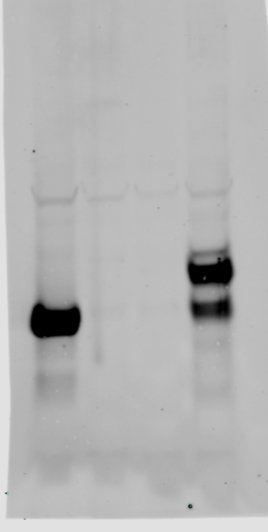


SDHB + V5

30 kDa


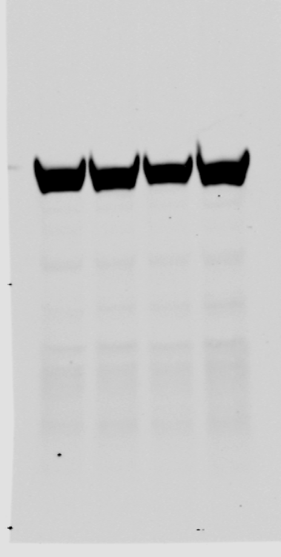


Tubulin

Raw Image


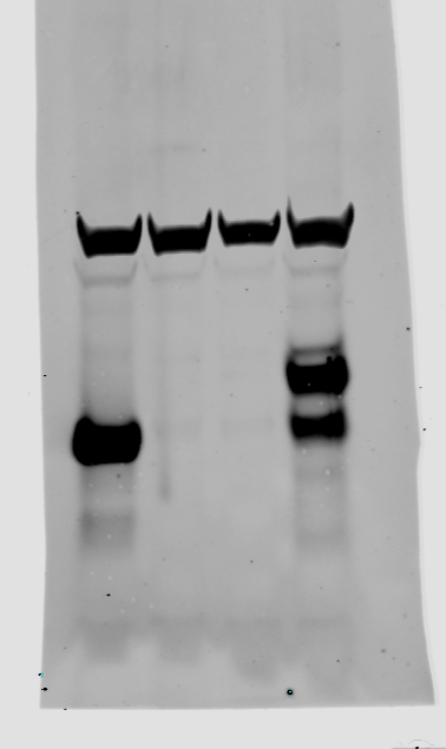

Supplement: supp [file Figure 2-figure supplement-source data 2.docx]
