# Supplementary material for: Mitochondrial redox adaptations enable alternative aspartate synthesis in SDH-deficient cells
Source: eLife journal article supplement (doi:10.7554/elife.78654), 2023-03-08
Supplement: supp [file Figure 2-source data 2.docx]

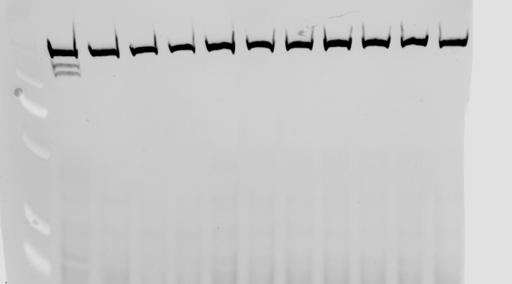

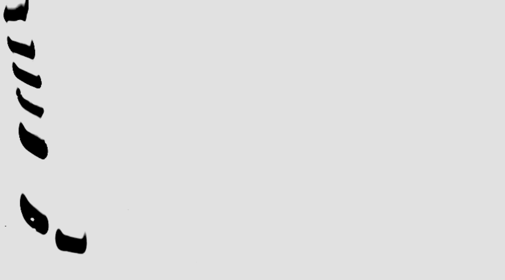

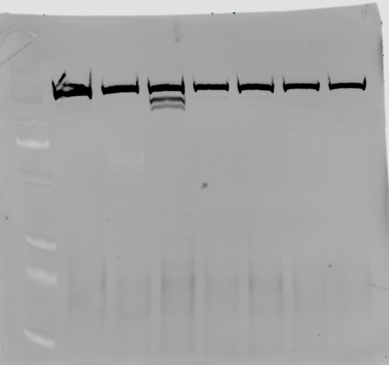

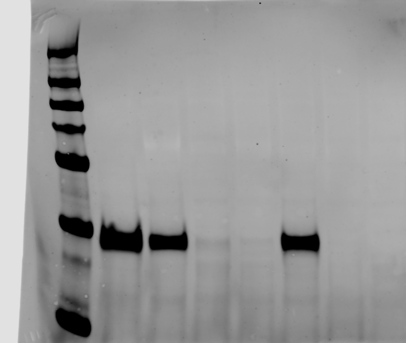


SDHB

WT SDHB KO 2

30 kDa

**Figure 2E**

WT 143B and SDHB KO clone 2 (143B)

Mock sgSDHB

**Figure 2C**

WT 143B and sgSDHB KO pool 143B

SDHB

115 kDa

Vinculin

Figure 2

30 kDa

115 kDa

Vinculin
