# Supplementary material for: Mitochondrial redox adaptations enable alternative aspartate synthesis in SDH-deficient cells
Source: eLife journal article supplement (doi:10.7554/elife.78654), 2023-03-08
Supplement: supp [file Figure 2-source data.xlsx]

## Sheet: 2A
			Vehicle			Rotenone			AA5			AA5+Rotenone
		1.51329	1.49713	1.5075	1.06147	1.26537	1.25161	0.527103	0.552724	0.527103	1.02544	1.09036	1.00131

## Sheet: 2B
			Vehicle			Rotenone			AA5			AA5+Rotenone
		1.02483	0.975574	0.999599	0.54008	0.577755	0.653057	0.0835868	0.091659	0.083567	0.299259	0.333098	0.338869

## Sheet: 2D
		Number of macroscopic colonies
	Day	-Rot	+Rot
	0	0	0
	3	0	0
	6	0	0
	9	0	0
	12	0	4
	15	0	12
	18	0	25
	21	0	27
	24	0	28
	27	0	28
	30	0	28

## Sheet: 2F
		SB2
	Vehichle	0.182609	0.319104	0.319104
	Rotenone	0.775907	0.755858	0.813247
	Metformin	0.816519	0.866242	0.707375
	ASP	0.841202	0.844117	0.838252

## Sheet: 2G
		DMSO			Rotenone
	WT	1.05902	0.966084	0.974898	0.324151	0.398388	0.367534
	SDHB KO	0.109473	0.118043	0.110392	0.299362	0.303227	0.313
