# Supplementary material for: Mitochondrial redox adaptations enable alternative aspartate synthesis in SDH-deficient cells
Source: eLife journal article supplement (doi:10.7554/elife.78654), 2023-03-08
Supplement: supp [file Figure 3-figure supplement 1-source data.xlsx]

## Sheet: S3B
	Vehicle			Rotenone			Antimycin			Oligomycin
Vehicle	1.25231	1.25231	1.14135	1.06971	1.04717	1.10607	0.83627	0.82406	0.809179	0.986146	0.938722	0.90107
AA5	0.511741	0.489233	0.454857	0.844526	0.83627	0.891346	0.838352	0.901506	0.769989	0.528052	0.536539	0.48649

## Sheet: S3C
		Vehicle			Rotenone			Antimycin			Oligomycin
	Vehicle	1.04295	0.962148	0.994899	0.47097	0.512558	0.510399	0.202547	0.229483	0.227301	0.701678	0.688252	0.815815
	AA5	0.0953885	0.0958705	0.0883277	0.224327	0.197264	0.203293	0.155215	0.16293	0.141626	0.125773	0.121603	0.113947

## Sheet: S3D
		11% O2			5% O2			3% O2			1% O2
	Normoxia Vehicle	1.35362	1.22527	1.30107	1.48172	1.61402	1.41162	1.25231	1.26366	1.14135	1.28502	1.35822	1.31615
	Hypoxia Vehicle	1.26123	1.41442	1.15659	1.09717	1.27059	1.2025	0.810303	0.919352	1.00264	1.10169	1.17353	1.20658
	Normoxia AA5	0.458603	0.384462	0.3904	0.660833	0.533539	0.511954	0.511741	0.489233	0.454857	0.451796	0.372002	0.392044
	Hypoxia AA5	0.479895	0.447467	0.43727	0.632401	0.619663	0.558123	0.521866	0.532926	0.57942	0.593419	0.604404	0.694846
