# Supplementary material for: Mitochondrial redox adaptations enable alternative aspartate synthesis in SDH-deficient cells
Source: eLife journal article supplement (doi:10.7554/elife.78654), 2023-03-08
Supplement: supp [file Figure 3-figure supplement 2-source data.xlsx]

## Sheet: S3B
	Time (minutes)	AA5/AZD7545			AA5
	1.59899	109.38	113.8	106.322	118.686	111.768	108.499
	8.1954	94.7233	101.528	93.9079	106.195	97.4154	96.3043
	14.7879	88.7715	95.6672	90.0935	100.983	92.8812	92.3986
	28.0511	27.7318	30.2188	27.1785	26.4772	24.5596	27.8722
	34.6414	25.6201	27.7496	25.1543	27.0832	22.8494	28.7162
	41.2374	25.935	28.3051	25.5266	27.5815	23.2558	27.7075
	47.8327	24.8175	27.0316	23.6698	25.2318	21.7772	25.1955
	61.1081	2.40693	1.72845	1.4276	2.67411	2.63087	2.46612
	67.726	0.2602	0.300003	0.114364	0.924615	0.443514	0.386234
	74.3411	-0.18545	0.192563	0.113792	-0.45709	-0.5726	-0.14745

## Sheet: S3C
			Vehicle			AA5			AA5+Rotenone			AA5+AZD7545
	WT 143B	1.08382	1.02569	0.890495	0.0765423	0.091339	0.083484	0.0204706	0.0108721	0.0243568	0.105449	0.104953	0.109015

## Sheet: S3D
	Untr	1.48038	1.49017	1.4493	0.580816	0.578135	0.582149
	AZD7545	1.47706	1.4555	1.48378	0.71159	0.726165	0.699299

## Sheet: S3E
		Vehicle			AA5
	Untr	0.995942	0.97486	1.0292	0.269419	0.274259	0.25139
	AZD7545	0.840758	0.772537	0.81134	0.319512	0.319019	0.303922
