# Supplementary material for: Mitochondrial redox adaptations enable alternative aspartate synthesis in SDH-deficient cells
Source: eLife journal article supplement (doi:10.7554/elife.78654), 2023-03-08
Supplement: supp [file Figure 3-source data.xlsx]

## Sheet: 3A
			Vehicle			Rotenone			AA5			AA5+Rotenone
	WT 143B	1.1006	0.759083	1.15802	0.599524	0.525706	0.652175	1.41815	2.23577	1.39726	0.631166	0.71088	0.595372

## Sheet: 3B
		DMSO			Rot			AA5			AA5+Rot
	Mito	2.45775	2.63669	4.69645	0.874812	1.22782	0.738253	25.8484	29.3232	14.8319	1.03507	1.22008	1.1427
	Cyto	7.94693	6.53927	5.85513	5.76635	7.86769	6.34918	3.92018	6.95296	3.5905	5.76645	4.58613	7.4495

## Sheet: 3E
		DMSO			Rot			AA5			AA5+Rot
	eGFP	1.4318	1.34482	1.38188	1.23634	1.22127	1.19148	0.514333	0.351314	0.384125	0.943385	0.965502	1.01041
	cytoLbNOX	1.36133	1.35611	1.34365	1.13114	0.973952	1.05585	0.482932	0.462664	0.415989	0.871202	0.838902	0.796053
	mitoLbNOX	1.29645	1.40258	1.28683	1.13742	1.05212	1.06683	0.226569	0.186308	0.170869	0.296704	0.315912	0.383505

## Sheet: 3F
			DMSO			Rot			AA5			AA5+Rot
		eGFP	1.0622	0.927559	1.01024	0.511784	0.454164	0.506616	0.0849618	0.103079	0.096594	0.214463	0.201881	0.242254
		cytoLbNOX	0.985411	0.956731	0.893087	0.495199	0.598756	0.536698	0.0978271	0.112143	0.108207	0.230322	0.250942	0.245689
		mitoLbNOX	0.749098	0.708248	0.633385	0.508068	0.538526	0.503039	0.0979686	0.0815502	0.0893744	0.104885	0.134173	0.122553
