# Supplementary material for: Mitochondrial redox adaptations enable alternative aspartate synthesis in SDH-deficient cells
Source: eLife journal article supplement (doi:10.7554/elife.78654), 2023-03-08
Supplement: supp [file Figure 4-figure supplement 1-source data.xlsx]

## Sheet: S4B
		DMSO			Rotenone			AA5			AA5+Rotenone
DMEM +PYR	1.33661	1.35896	1.33157	1.14551	1.13877	1.04618	0.657457	0.609799	0.611137	1.02561	1.06336	1.03024
DMEM +AKB	1.23106	1.11413	1.19613	0.979138	1.04054	1.0047	0.40628	0.429115	0.433513	0.929668	0.87406	0.833595

## Sheet: S4C
			DMSO			Rotenone			AA5			AA5+Rotenone
	DMEM +PYR	1.05007	0.903917	1.04601	0.566998	0.685583	0.536837	0.162794	0.108769	0.114643	0.296132	0.260384	0.286306
	DMEM +AKB	0.878809	1.07349	1.0477	0.362521	0.427252	0.356436	0.06781	0.0721326	0.0715961	0.14385	0.135966	0.15262
