# Supplementary material for: Mitochondrial redox adaptations enable alternative aspartate synthesis in SDH-deficient cells
Source: eLife journal article supplement (doi:10.7554/elife.78654), 2023-03-08
Supplement: supp [file Figure 4-source data.xlsx]

## Sheet: 4B
				M+0			M+1			M+2			M+3			M+4
		WT Untr	0.137803	0.13461	0.102444	0.00679877	0.00614328	0.00471291	0.0644979	0.0590756	0.047618	0.0524149	0.0486105	0.0447377	0.825045	0.825599	0.63989
		WT Rot	0.154222	0.128639	0.168108	0.000231383	0	0	0.0104815	0.0101497	0.0129942	0.0357331	0.0239298	0.0299089	0.332937	0.296279	0.388675
			M+0			M+1			M+2			M+3			M+4
		SDHB Untr	0.0458312	0.0478886	0.049331	0	0	0	0	0	0	0.00813878	0.00914594	0.00932052	2.9123e-05	3.70621e-06	0
		SDHB Rot	0.12759	0.122389	0.132916	0	0	0	0	0	0	0.0183544	0.0184285	0.0213012	1.77942e-05	0	0

## Sheet: 4F
		M+0			M+1			M+2			M+3			M+4
	WT Untr	1.01708	0.886513	0.816146	0.00671135	0.00500482	0.00503128	0.0631338	0.0524921	0.0470666	0.0366054	0.0256232	0.0320933	0.00259077	0.00199698	0.00191451
	WT Rot	0.530302	0.422487	0.434077	0.00158044	0.000838948	0.00064135	0.0186954	0.0140045	0.0135572	0.0548947	0.0511579	0.0521945	0.00193999	0.00157825	0.00152564
		M+0			M+1			M+2			M+3			M+4
	SDHB Untr	0.0216983	0.0224103	0.0266327	0	0	0	3.58129e-05	3.18576e-05	0.000144002	0.0236315	0.0237754	0.0310376	0	0	0
	SDHB Rot	0.0652522	0.0630593	0.0607958	0	0	0	0.00335883	0.00289696	0.00243395	0.117798	0.108018	0.0998111	0	0	0

## Sheet: 4C
		DMSO			BMS			Rotenone			AA5			AA5+Rot			AA5+Rot+BMS			AA5+Rot+BMS+ASP
	1.4502	1.46423	1.35181	1.29459	1.26217	1.29445	1.05442	0.950749	0.945986	0.458312	0.442279	0.538508	0.951476	0.96432	0.876669	0.698192	0.801951	0.731767	0.839512	0.86578	0.940036

## Sheet: 4D
		DMSO			BMS			Rotenone			AA5			AA5+Rot			AA5+Rot+BMS
	0.878809	1.07349	1.0477	1.18201	1.16537	1.25355	0.362521	0.427252	0.356436	0.06781	0.0721326	0.0715961	0.14385	0.135966	0.15262	0.126683	0.128764	0.120851

## Sheet: 4H
			DMSO			BMS			Rotenone			AA5			AA5+Rot			AA5+Rot+BMS			AA5+Rot+BMS+ASP
	PC KO 2	1.16807	1.24392	1.24392	1.27754	1.25211	1.27374	1.04342	1.06414	1.04234	0.217251	0.207845	0.267193	0.586305	0.630919	0.630919	0.191729	-0.0334639	0.135875	0.632051	0.655046	0.60749
	PC AB 2	1.34097	1.34293	1.32921	1.27294	1.17837	1.23075	1.07538	1.10826	1.02531	0.472647	0.50403	0.493869	0.821247	0.879655	0.766341	0.322285	0.339289	0.491284	0.553129	0.576407	0.518753

## Sheet: 4I
			DMSO			BMS			Rotenone			AA5			AA5+Rot			AA5+Rot+BMS
	PC KO 2	0.733289	0.767809	0.761968	1.03434	0.976104	0.920582	0.116979	0.108564	0.116289	0.0264701	0.0228582	0.0248758	0.0480613	0.0344365	0.0299143	0.0258695	0.0262891	0.0290458
	PC AB 2	0.998031	1.00269	0.999279	1.18869	1.15538	1.2874	0.23017	0.293517	0.220705	0.0430112	0.0450046	0.0448558	0.083947	0.0901324	0.0970729	0.0669753	0.0750073	0.0665792
