# Supplementary material for: Mitochondrial redox adaptations enable alternative aspartate synthesis in SDH-deficient cells
Source: eLife journal article supplement (doi:10.7554/elife.78654), 2023-03-08
Supplement: supp [file Figure 5-figure supplement 1-source data.xlsx]

## Sheet: S5B
			DMSO			AA5			AA5+Rot
	MPC1 KO	0.0315018	0.0264213	0.0261927	0.0156522	0.0166189	0.0266063	0.0257546	0.0244695	0.0232873
	MPC1 AB	1.17348	0.899828	0.926695	0.676213	0.506106	0.545845	0.942071	1.0331	0.928228
