# Supplementary material for: Mitochondrial redox adaptations enable alternative aspartate synthesis in SDH-deficient cells
Source: eLife journal article supplement (doi:10.7554/elife.78654), 2023-03-08
Supplement: supp [file Figure 5-source data.xlsx]

## Sheet: 5B
	DMSO			AA5			AA5+Rot
MPC1 KO 1	0.947751	0.92616	0.905101	0.0810291	0.0749988	0.108025	0.046541	0.0419886	0.0373779
MPC1 AB 1	1.37157	1.46357	1.44407	0.465673	0.465673	0.434138	0.945403	0.87991	0.840013

## Sheet: 5C
		MPC1 KO 1			MPC1 AB 1
DMSO	0.783881	0.755328	0.772186	1.09155	0.943722	0.964724
AA5	0.0389294	0.046573	0.0409016	0.0643869	0.0568825	0.0624264
AA5+Rot	0.0480173	0.0558705	0.0562988	0.148321	0.18218	0.159055

## Sheet: 5D
MPC1 KO 2
		No ASP			ASP
DMSO	0.815426	0.844935	0.84316	1.02977	1.08536	1.13086
AA5	0.148487	0.184855	0.114802	1.10883	1.13617	1.04364
AA5+Rot	0.281178	0.251839	0.245673	0.763122	0.840779	0.830482

## Sheet: 5E
		MPC1 KO 1			MPC1 AB 1
DMSO	0.271637	0.254875	0.268373	1.11357	0.934832	0.951593
AA5	0.252696	0.290302	0.247474	0.456851	0.410007	0.441748
AA5+Rot	0.0642869	0.0915719	0.0712241	0.780083	0.957006	0.793684
