# Supplementary material for: Mitochondrial redox adaptations enable alternative aspartate synthesis in SDH-deficient cells
Source: eLife journal article supplement (doi:10.7554/elife.78654), 2023-03-08
Supplement: supp [file Figure 6-figure supplement 1-source data.xlsx]

## Sheet: S6A
		-PYR
	GOT2 KO	0.020762	-0.0252287	-0.0691556
	GOT2 AB	0.941025	1.0134	1.00383

## Sheet: S6B
		GOT1 KO			GOT1 AB
DMSO	1.40825	1.83447	1.68646	1.08886	0.867712	1.04343
AA5	0.143571	0.149761	0.168284	0.141684	0.153898	0.159763
AA5+Rot	1.14186	1.0078	0.880935	0.553428	0.563637	0.559773

## Sheet: S6E
		MDH1 KO			MDH1 AB
DMSO	1.40825	1.83447	1.68646	1.08886	0.867712	1.04343
AA5	0.143571	0.149761	0.168284	0.141684	0.153898	0.159763
AA5+Rot	1.14186	1.0078	0.880935	0.553428	0.563637	0.559773

## Sheet: S6F
			DMSO			AA5			AA5+Rot
	MDH1 KO	2.29141	2.32155	2.42639	0.103411	0.099564	0.106932	0.11056	0.11779	0.112967
	MDH1 AB	1.01392	0.953547	1.03253	0.120345	0.147431	0.146851	0.080686	0.0910455	0.0765726

## Sheet: S6G
			DMSO			AA5			AA5+Rot
	WT	1.48038	1.49017	1.4493	0.580816	0.578135	0.582149	1.09714	1.13412	1.03721
	PC	1.15967	1.04493	1.05804	-0.323334	-0.144274	-0.364624	0.375463	0.342969	0.366798
	GOT2	1.33291	1.36893	1.30732	0.0156838	0.0086304	0.000775123	1.04546	1.01695	1.06223
	GOT1	1.37167	1.34638	1.34839	0.555911	0.537411	0.51388	0.400539	0.411469	0.349992
	MDH1	1.22	1.24	1.17	0.612	0.61	0.543	0.599	0.622	0.554
