# Supplementary material for: Mitochondrial redox adaptations enable alternative aspartate synthesis in SDH-deficient cells
Source: eLife journal article supplement (doi:10.7554/elife.78654), 2023-03-08
Supplement: supp [file Figure 6-source data.xlsx]

## Sheet: 6B
		DMSO			AA5			AA5+Rot
GOT2 KO	1.33291	1.36893	1.30732	0.0156838	0.0086304	0.000775123	1.04546	1.01695	1.06223
GOT2 AB	1.2102	1.24981	1.26117	0.525962	0.467851	0.452391	0.966587	0.960203	0.969737

## Sheet: 6C
		DMSO			AA5			AA5+Rot
GOT2 KO	0.747875	0.775119	0.644076	0.0719234	0.0593308	0.0731446	0.154445	0.15586	0.16335
GOT2 AB	1.02895	1.03259	0.938458	0.112458	0.102226	0.10897	0.222824	0.270845	0.234179

## Sheet: 6D
			DMSO			AA5			AA5+Rot			AA5+ASP
	GOT2 KO	1.33744	1.375	1.24522	0.233325	0.294911	0.173713	0.995787	1.0003	1.00475	1.04003	0.904658	0.933415

## Sheet: 6F
			DMSO			AA5			AA5+Rot
	GOT1 KO	1.16279	1.0983	1.10347	0.562702	0.414055	0.498857	0.252049	0.448563	0.35296
	GOT1 AB	1.43081	1.46691	1.43774	0.788349	0.842248	0.863091	1.18754	1.18141	1.14092

## Sheet: 6G
		GOT1 KO			GOT1 AB
DMSO	1.35661	1.43142	1.34408	1.02996	0.97321	0.996833
AA5	0.11958	0.130452	0.148671	0.084705	0.0862729	0.0896952
AA5+Rot	0.0725291	0.0921109	0.100002	0.268596	0.243259	0.24594

## Sheet: 6H
		DMSO			AA5			AA5+Rot			AA5+Rot+ASP
GOT1 KO	1.37167	1.34638	1.34839	0.555911	0.537411	0.51388	0.400539	0.411469	0.349992	0.88855	0.976554	0.939302
