# Supplementary material for: Mitochondrial redox adaptations enable alternative aspartate synthesis in SDH-deficient cells
Source: eLife journal article supplement (doi:10.7554/elife.78654), 2023-03-08
Supplement: supp [file Figure 7-figure supplement 1-source data.xlsx]

## Sheet: S7B
		Passage 4			Passage 9			Passage 15
	Vehicle	0.253483	0.228807	0.294769	0.375985	0.435098	0.416042	0.570244	0.601739	0.612806
	Piericidin	0.58293	0.521272		0.60312	0.637914	0.597111	0.684477	0.655394	0.65698

## Sheet: S7D
		Vehicle			Rotenone			Metformin			Aspartate
	"Stalled"	0.449287	0.489547	0.443291	0.655209	0.655209	0.666509	0.738189	0.734238	0.712657	0.87853	0.802776	0.85209
