# Supplementary material for: Mitochondrial redox adaptations enable alternative aspartate synthesis in SDH-deficient cells
Source: eLife journal article supplement (doi:10.7554/elife.78654), 2023-03-08
Supplement: supp [file Figure 7-source data.xlsx]

## Sheet: 7B
			DMSO			Rotenone			Aspartate
		WT	1.30102	1.33997	1.25764	0.973443	0.962077	0.87921	1.30261	1.22344	1.22278
		AB2	1.17196	1.16824	1.08783	0.839	0.875209	0.766018	1.20947	1.17103	1.14934
		EP2	0.174343	0.200955	0.160421	0.680807	0.660857	0.682609	0.817399	0.796794	0.831316
		LP2	0.636449	0.632566	0.63469	0.664172	0.701185	0.694955	0.789741	0.774941	0.799866

## Sheet: 7C
			Vehicle			Rotenone
		WT	1.02435	1.00815	0.967497	0.362485	0.469993	0.399857
		AB	1.6257	1.55502	1.58299	0.63253	0.611854	0.598809
		EP	0.12546	0.141396	0.14315	0.364469	0.343593	0.382195
		LP	0.340727	0.336924	0.370772	0.607729	0.623555	0.598162

## Sheet: 7D
		DMSO			Rotenone
	WT	1.39222	1.18471	1.30733	0.692704	1.00992	0.74675
	AB	0.977225	0.645696	1.27711	0.751035	0.54045	1.00095
	EP	2.46962	3.28525	2.99641	1.2117	0.998064	1.23068
	LP	0.765809	0.888547	0.839004	0.672475	0.814464	0.944515

## Sheet: 7F
		log2	neglog10
		fc.LP.WT.	p.WT.LP.		45 complex I subunits highlighted
	STOM	1.88709	4.68573		4 complex II subunits highlighted
	GPX4	1.59701	6.14138
	ACOT2	1.5085	3.07661
	ACSF2	1.42611	3.17217
	ETFRF1	1.3991	3.03167
	GLS	1.23539	2.5428
	OCIAD2	1.22143	4.62517
	BID	1.17881	2.79734
	ABHD10	1.16877	3.77694
	LYRM2	1.0605	2.11957
	OXR1	1.05635	3.47597
	PC	1.03465	2.90466
	FXN	1.02086	1.88428
	MMAB	1.00424	3.52589
	YARS2	0.998943	4.6601
	GLS	0.98328	2.435
	QDPR	0.980062	4.47468
	PRELID1	0.979885	3.03522
	SFXN5	0.933713	3.42013
	SLC25A29	0.933278	3.72948
	SPATA20	0.928675	4.32852
	ALDH5A1	0.928621	2.5432
	ARMCX1	0.928132	3.64011
	TDRKH	0.925683	4.09884
	BCAT2	0.920821	2.96748
	FUNDC2	0.918184	4.27572
	MAVS	0.91179	5.06142
	PCK2	0.906917	3.06314
	NAXD	0.905729	3.39245
	SLC25A46	0.885877	3.06946
	CASP8	0.874986	2.19512
	ALDH6A1	0.858862	2.68668
	PDSS1	0.854602	3.76521
	ACAT1	0.848498	2.45988
	SLC25A4	0.847241	4.40003
	ARMCX2	0.82656	4.48669
	FAHD1	0.822819	3.00633
	MTCH2	0.819572	3.94307
	ALDH1L2	0.809433	2.94255
	NLRX1	0.799287	3.1096
	LONP1	0.791244	3.04827
	NUDT9	0.776268	2.35316
	TARS2	0.761402	2.67719
	EXD2	0.757633	3.60785
	DGLUCY	0.755416	1.66675
	ALDH2	0.741706	2.18712
	BDH1	0.733639	4.0774
	SPRYD4	0.729102	2.02114
	NIT2	0.727654	3.44424
	STARD7	0.716838	3.40703
	TST	0.702562	2.32768
	AARS2	0.694859	2.28166
	METTL8	0.694525	2.06301
	TIMM8B	0.682432	3.06588
	MSRA	0.681645	2.71989
	AKR7A2	0.680353	3.01125
	DHTKD1	0.679485	2.85539
	TXNRD2	0.671403	1.92989
	SERAC1	0.660682	2.05228
	HSCB	0.657805	1.68162
	AKAP10	0.654984	3.59352
	IDH2	0.651054	2.24884
	NFU1	0.647799	1.79039
	C8orf82	0.635331	2.54354
	ACAD11	0.633894	2.62348
	TIMM44	0.632349	3.69694
	PREPL	0.623261	2.52958
	TOP3A	0.621866	2.85903
	MCCC1	0.611141	2.65145
	DMAC2L	0.606116	3.19061
	COX20	0.603294	3.2557
	MRM1	0.600223	2.06522
	EHHADH	0.598979	3.88893
	METAP1D	0.597241	1.11484
	UNG	0.592642	1.20992
	SIRT5	0.586091	3.09127
	GTPBP6	0.583045	1.706
	SLC25A35	0.578845	2.05586
	PARL	0.575906	3.16815
	DNM1L	0.570672	3.66842
	TOMM34	0.569943	3.5504
	DHRS4	0.567371	3.11657
	TACO1	0.564629	3.17401
	SPIRE1	0.556393	1.34791
	DTYMK	0.549689	3.22493
	PTPMT1	0.547605	2.28576
	TOMM40L	0.541973	2.6814
	ACOT9	0.540686	2.67998
	TRMT2B	0.534807	2.28365
	ARMCX3	0.533941	3.02302
	BCL2L13	0.533408	2.52541
	TRMT61B	0.526016	1.9321
	SPR	0.524876	3.05878
	TIMMDC1	0.518255	2.95345
	ECI2	0.518077	2.84264
	ALAS1	0.517399	1.68782
	BAX	0.517141	2.13496
	PDPR	0.511235	2.1267
	ACOT13	0.507172	2.12792
	TWNK	0.50462	2.71702
	PYCR1	0.503103	3.71617
	RECQL4	0.489561	2.29006
	HSD17B8	0.485427	1.738
	MTCH1	0.485257	3.19554
	LACTB2	0.483818	2.03765
	SHMT2	0.482161	1.63615
	C3orf33	0.480958	2.53786
	MGME1	0.478274	2.11729
	POLG	0.477844	2.72669
	IBA57	0.473172	1.35594
	MPV17L2	0.472572	1.15305
	OSGEPL1	0.471681	2.11752
	GFM1	0.46708	1.26227
	PPOX	0.466781	1.73842
	PDK3	0.466455	1.29024
	PTGES2	0.464107	3.43853
	TSPO	0.460445	2.51059
	SOD2	0.459974	1.17381
	SQOR	0.458945	1.41705
	GRHPR	0.455546	2.28886
	NUDT19	0.455444	2.22961
	HEBP1	0.450887	2.83465
	PGS1	0.450408	2.53728
	TRNT1	0.449185	1.64551
	MTHFS	0.446425	3.4643
	ACP6	0.445818	0.933081
	PDE12	0.431999	1.40258
	POLG2	0.428053	2.45031
	ARG2	0.426458	1.0107
	ACAD8	0.423881	1.54975
	MTHFD1L	0.4222	2.51486
	SMIM20	0.422058	2.07523
	SCO2	0.41305	1.91709
	GRPEL1	0.411	1.02183
	HINT1	0.40817	2.2653
	COX14	0.404205	1.05879
	AKAP1	0.40029	1.75939
	EXOG	0.399756	1.81841
	NDUFAF4	0.398724	2.78876
	FECH	0.394353	2.41783
	QTRT1	0.393823	1.60855
	MTHFD1L	0.392888	1.63541
	ISCA1	0.392782	1.02476
	DNAJC19	0.392537	1.84085
	SIRT3	0.388535	2.0178
	GOT2	0.387358	1.63622
	REXO2	0.384252	1.88158
	FAM136A	0.383287	2.2254
	MTX1	0.382124	2.4169
	NT5DC3	0.380172	1.01814
	L2HGDH	0.378741	1.9143
	NDUFAF5	0.378239	1.36914
	NME6	0.374808	1.01456
	MARS2	0.368157	2.37347
	PET117	0.364086	1.56492
	PDP1	0.360777	1.4169
	LACTB	0.36004	2.56208
	HIBCH	0.359529	1.2435
	TMEM11	0.358306	2.35121
	PITRM1	0.357041	1.6143
	TEFM	0.349647	1.18423
	SSBP1	0.343755	1.59091
	SLC25A25	0.342824	2.28577
	ZADH2	0.341371	1.96818
	ECHDC3	0.33988	1.9985
	GRPEL2	0.336697	1.26741
	CPS1	0.336517	1.22188
	MCCC2	0.335973	1.68618
	MRPS6	0.335169	1.51039
	PNKD	0.332064	1.50459
	NIPSNAP1	0.331737	3.11032
	HIBCH	0.331397	1.08748
	NDUFAF7	0.330967	2.03766
	CBR4	0.330911	1.59617
	ALDH4A1	0.328162	1.35185
	TXNRD1	0.321829	2.8685
	MPST	0.31926	1.50367
	PRKACA	0.31806	2.48623
	PYCR2	0.317238	2.04244
	SLC25A12	0.315959	2.22382
	GCSH	0.315295	0.6919
	HAGH	0.314778	2.15991
	PDF	0.312422	1.87085
	AK3	0.306491	1.28699
	MRPS33	0.302767	1.81311
	TMEM65	0.301595	1.65839
	IVD	0.297558	1.13288
	NSUN3	0.296253	1.19259
	NME4	0.296195	0.844053
	GLRX5	0.295145	0.442087
	COA3	0.294881	1.67056
	NAXE	0.294815	0.809124
	MTRES1	0.292722	2.19796
	MMUT	0.290543	1.10726
	ACSF3	0.288003	1.64472
	MCAT	0.287249	1.01997
	LETMD1	0.28578	1.57216
	ECI1	0.28323	0.975238
	HADHA	0.282346	1.88473
	COQ6	0.282059	0.898913
	FDX1	0.27749	0.326285
	MAOA	0.277438	2.12945
	SLC25A10	0.276243	1.46045
	CMC2	0.272909	1.95313
	CCDC90B	0.272546	2.13176
	METTL5	0.271625	0.798017
	HADHB	0.271145	2.00349
	NDUFA7	0.270188	0.487274
	OCIAD1	0.269897	1.48456
	MRPS14	0.269711	0.849891
	TIMM13	0.26947	1.41879
	MCUR1	0.268478	1.36727
	ALKBH1	0.267731	0.722724
	SMIM8	0.263553	0.581236
	CISD3	0.261646	1.52791
	TRMU	0.260733	0.554122
	NDUFAF3	0.259785	2.05522
	KYAT3	0.257045	1.02103
	MRPS2	0.255646	0.951621
	MCUB	0.255397	1.24803
	SLC25A16	0.250873	1.40495
	MRPS23	0.24937	1.02323
	ACAD9	0.247234	1.6764
	ACACA	0.246755	1.12563
	SLC25A33	0.246575	0.589064
	CASP3	0.241008	0.815698
	ACSL1	0.240783	1.44151
	GLUD1	0.240643	1.36846
	HSDL1	0.239601	1.0358
	TSFM	0.238463	1.04102
	MRPS21	0.238109	1.2666
	MRPS11	0.237492	1.33386
	NARS2	0.234629	0.739986
	GSR	0.231008	1.5199
	HINT2	0.229439	0.789626
	HARS2	0.229179	1.36567
	GSTZ1	0.228609	1.27644
	MTERF3	0.224603	1.71496
	DCXR	0.221315	0.806122
	MRM3	0.220714	1.06475
	DLST	0.220511	0.661122
	ATPAF1	0.219204	0.566439
	TIMM22	0.219121	1.28976
	ARL2	0.219084	1.85933
	GTPBP3	0.21848	0.608605
	BOLA3	0.21729	0.68474
	HIBADH	0.216454	0.802045
	RARS2	0.215116	0.6751
	MTRF1	0.21383	1.27795
	PRDX5	0.212416	1.02329
	LARS2	0.211845	0.594839
	BNIP3L	0.211064	0.453129
	ACLY	0.210456	1.74721
	MRPS26	0.209824	0.862659
	PLGRKT	0.208838	1.71228
	GPT2	0.208713	0.775734
	POLDIP2	0.200506	0.662129
	CDK5RAP1	0.199052	0.435273
	MRPS22	0.198753	0.68119
	HSPD1	0.198569	0.492601
	MRPS27	0.197104	0.650659
	NFS1	0.19479	0.506731
	FASN	0.19444	0.695172
	GCDH	0.194348	0.455534
	PDSS2	0.192359	1.52074
	VDAC1	0.190272	0.274885
	ALDH1B1	0.189801	0.465478
	MRPS18C	0.188983	0.688235
	OGDHL	0.188191	0.570393
	MOCS1	0.187687	0.431332
	DHX30	0.185238	0.802126
	PRDX4	0.184777	0.507897
	C1QBP	0.183501	0.459721
	BAK1	0.180201	0.905234
	TUFM	0.180118	0.509144
	COQ3	0.178223	0.751429
	LETM1	0.177851	1.13187
	MRPS28	0.175771	0.583394
	BPHL	0.174094	0.692733
	ACAD10	0.164223	0.39742
	GCAT	0.164204	0.387033
	PUS1	0.162256	0.480402
	CHCHD6	0.162247	0.704803
	HSPE1	0.161196	0.306073
	GARS1	0.160181	1.17555
	TMEM177	0.159791	0.686548
	PTRH2	0.159459	0.942692
	PMPCA	0.15904	0.42749
	DAP3	0.15873	0.776179
	MRPS18B	0.158686	0.507973
	MRPS9	0.158514	0.500704
	AK4	0.157828	0.755148
	ACAA2	0.156664	0.480344
	SLC25A5	0.155994	0.941221
	FUNDC1	0.155428	0.291608
	MRPS34	0.154657	0.572294
	RSAD1	0.15427	0.358793
	MFN1	0.153616	0.678049
	ATPAF2	0.153072	0.331591
	GUF1	0.151153	0.705387
	QRSL1	0.150705	0.350078
	FASTKD5	0.150464	0.596837
	MRPS16	0.149759	0.466366
	COQ9	0.149228	0.488968
	SYNJ2BP	0.147394	1.12989
	MTCH2	0.146619	0.87935
	ECH1	0.143636	0.343062
	ALDH18A1	0.141694	0.751965
	MRPS25	0.140305	0.512528
	MACROD1	0.139648	0.270776
	GLOD4	0.139246	1.13993
	HSPE1	0.137188	0.259344
	MFN2	0.134061	0.72086
	HTRA2	0.133718	0.85969
	ETFB	0.132683	0.375034
	CMC1	0.132406	0.70942
	LYRM4	0.132262	0.324739
	COASY	0.132014	0.598354
	MTG2	0.130974	0.465108
	TXN2	0.129755	0.250129
	ETFA	0.128501	0.308734
	C12orf65	0.127664	0.268089
	MRPS12	0.125642	0.483767
	MFF	0.125536	1.23531
	MGST1	0.125036	0.808858
	TIMM17B	0.123653	0.885775
	AK2	0.122994	0.524878
	FDPS	0.122154	0.311708
	MRPS10	0.120658	0.48408
	CPOX	0.119683	0.317655
	MRPS17	0.119049	0.366224
	MRPS5	0.116849	0.372576
	SLC25A22	0.116846	0.868488
	LDHB	0.11653	0.605815
	AASS	0.113584	0.279743
	MPV17	0.113359	0.801327
	MRPL12	0.113299	0.44341
	HCCS	0.112434	0.63728
	GFM2	0.111804	0.451848
	NDUFAF2	0.110931	0.619113
	PPTC7	0.11047	0.176875
	ACOT7	0.110269	0.387343
	SLC25A1	0.110086	0.470262
	HSD17B10	0.110028	0.353721
	MRPS15	0.106426	0.597119
	PNPO	0.105577	0.354356
	CS	0.104742	0.179123
	LAP3	0.103694	0.307862
	MTFP1	0.102123	1.14429
	MRPL46	0.101075	0.311076
	MTG1	0.0973827	0.289705
	OXNAD1	0.0951648	0.306063
	MRS2	0.0940222	0.382468
	LYRM7	0.092807	0.154224
	RDH13	0.0902736	0.375195
	MRPL34	0.0870972	0.299999
	PARS2	0.0868774	0.384771
	THNSL1	0.0851306	0.171218
	TRMT10C	0.0836444	0.21168
	COX11	0.0776321	0.216966
	NDUFA11	0.0776275	0.459542
	TOMM70	0.0766631	0.307632
	NSUN4	0.071744	0.394335
	ATP5MF	0.0687346	0.150287
	ABHD11	0.0679161	0.320328
	AGK	0.0671263	0.429212
	MTIF2	0.0661269	0.203375
	YRDC	0.0654891	0.254226
	SLC25A23	0.0611526	0.0949734
	MRPS35	0.0580587	0.182799
	MAIP1	0.0569782	0.259253
	ATP5IF1	0.0553183	0.171143
	MGST3	0.0533917	0.253482
	MRPS7	0.0527858	0.179809
	TMEM126A	0.0526361	0.297058
	PAICS	0.0504792	0.195099
	MRPL10	0.0495901	0.115461
	ISCA2	0.04898	0.0864713
	NAGS	0.0488944	0.118956
	SFXN4	0.0477641	0.234191
	ACADVL	0.0464602	0.153534
	PEX11B	0.0441669	0.283709
	DNAJA3	0.043547	0.13291
	AIFM2	0.0423498	0.180408
	MUL1	0.0421301	0.16677
	MRPL1	0.0411381	0.098875
	CCDC51	0.0339135	0.102251
	MRPL57	0.0322701	0.0914648
	BLOC1S1	0.0312079	0.136058
	NDUFB11	0.0310235	0.0986982
	SOD1	0.029955	0.171489
	COQ5	0.0298115	0.07408
	ALDH7A1	0.0297419	0.0832109
	NUDT5	0.0297098	0.105248
	MRPL2	0.029176	0.071989
	FPGS	0.0275332	0.0687569
	DNAJC11	0.0273685	0.0979494
	GSTK1	0.0265043	0.13074
	DECR1	0.0244754	0.093776
	AFG1L	0.0228099	0.146507
	PET100	0.0223967	0.0691886
	SLC25A11	0.0217797	0.0855903
	HSPA9	0.0211497	0.0412525
	MRPL27	0.0169683	0.0425481
	POLRMT	0.0148958	0.0416849
	SNAP29	0.0146425	0.0784205
	APOOL	0.0127582	0.0514927
	SFXN3	0.0111922	0.0601062
	COA1	0.00964513	0.0268678
	TIMM29	0.00726582	0.039114
	MRPL53	0.0071143	0.0235069
	MRPL47	0.00637194	0.015578
	PTCD3	0.00181851	0.00531594
	NIPSNAP2	0.00161876	0.00672734
	PMAIP1	0.00073915	0.00337959
	SLC25A19	-0.0002178	0.00070891
	PDK1	-0.0008814	0.00247603
	COMT	-0.0014946	0.00346691
	PDHA1	-0.0019668	0.00476322
	MPC2	-0.0019938	0.00466729
	TIMM50	-0.0021855	0.00574281
	MRPL48	-0.0041641	0.0126646
	MRPL35	-0.0067653	0.017688
	TIMM23	-0.0094994	0.0234005
	HPDL	-0.0117361	0.0228853
	PRDX3	-0.0118914	0.0325049
	PMPCB	-0.0122853	0.0228487
	GATB	-0.0122965	0.0241257
	FOXRED1	-0.0133111	0.0630313
	TIMM10B	-0.0135075	0.0396755
	GPD2	-0.0139915	0.0668699
	MRPL54	-0.0151677	0.0333502
	ACOT11	-0.0194065	0.0572717
	MRPL22	-0.0208054	0.0523218
	PPIF	-0.0214424	0.0524569
	SLC25A51	-0.0218732	0.0598493
	VDAC1	-0.0220596	0.104939
	VDAC3	-0.0247557	0.113815
	MRPL50	-0.0314114	0.0630785
	NUBPL	-0.033423	0.108424
	PDHB	-0.0338898	0.0993261
	RPUSD3	-0.0360313	0.120772
	APEX1	-0.0379282	0.0972846
	AUH	-0.0391453	0.109473
	IDH3G	-0.0394383	0.114467
	RHOT1	-0.0424002	0.111312
	FAM162A	-0.0446642	0.107516
	DIABLO	-0.0450898	0.127203
	MRPL20	-0.0482312	0.132291
	MRPS24	-0.0485029	0.135264
	MRPL28	-0.0486954	0.119842
	OSBPL1A	-0.0490827	0.303009
	MRPS36	-0.0498519	0.0987138
	CLPX	-0.0499162	0.117205
	AIFM1	-0.0505775	0.32684
	AFG3L2	-0.050667	0.214885
	COQ7	-0.0511153	0.187461
	CS	-0.05162	0.129846
	MRPL23	-0.0527455	0.123756
	SARS2	-0.0528396	0.127511
	SDR39U1	-0.0530348	0.104989
	EARS2	-0.0555136	0.133195
	UQCR10	-0.0571601	0.220548
	CLPB	-0.0592048	0.165342
	MRPL21	-0.0597812	0.116825
	OAT	-0.0602618	0.127251
	GPAM	-0.0622154	0.173186
	SFXN1	-0.0638709	0.375854
	MRPL41	-0.0666966	0.17953
	ACO2	-0.0671408	0.163753
	RBFA	-0.0693994	0.249317
	MRPL15	-0.0701593	0.169585
	COX18	-0.0728408	0.101821
	SLC25A20	-0.0735295	0.276902
	CLPB	-0.0754286	0.481131
	MRPL4	-0.075905	0.191587
	MTX2	-0.0763309	0.374177
	TRAP1	-0.0766981	0.217393
	CYC1	-0.0790759	0.470918
	MRPL9	-0.0806222	0.245254
	NT5DC2	-0.0818657	0.268461
	TOMM6	-0.0827857	0.285642
	NLN	-0.0839324	0.233234
	LYPLA1	-0.0855841	0.335044
	MRPL44	-0.0868909	0.250985
	MRPL39	-0.087024	0.202777
	PISD	-0.0876769	0.427303
	MRPS31	-0.0888859	0.306905
	MRPL37	-0.0901174	0.269684
	DMAC2	-0.0902627	0.295517
	TOMM40	-0.0910558	0.39643
	SUPV3L1	-0.0912169	0.493795
	MRPL45	-0.0935385	0.252936
	MRPL40	-0.094125	0.314087
	NDUFB5	-0.0944917	0.690687
	SUCLA2	-0.0983995	0.270715
	TRMT5	-0.0986176	0.254329
	TMEM14C	-0.0992012	0.434247
	IDH3A	-0.0996692	0.285816
	NDUFB6	-0.0999219	0.372511
	MRPL58	-0.10019	0.268135
	MRPL11	-0.100542	0.297767
	MRPL19	-0.104957	0.297344
	MARCHF5	-0.10877	0.75324
	DARS2	-0.110351	0.47481
	MTFR1	-0.111421	0.166963
	FDXR	-0.112483	0.398922
	ABCB8	-0.113387	0.654525
	CYB5R3	-0.114609	0.644295
	TMEM126B	-0.114814	0.297329
	SAMM50	-0.114966	0.598165
	RAB24	-0.115349	0.532493
	MRPL13	-0.117919	0.340873
	TBRG4	-0.119112	0.489578
	MRPL49	-0.119158	0.33588
	CCDC127	-0.12011	0.865277
	NDUFB10	-0.120261	0.434964
	MRPL18	-0.120368	0.415094
	IDH3B	-0.120496	0.408515
	MRPS30	-0.120901	0.362236
	ACADSB	-0.123484	0.315864
	SLC25A26	-0.126551	0.218775
	PDHX	-0.129105	0.566937
	CYCS	-0.129468	0.355373
	SURF1	-0.13006	0.492292
	UQCRH	-0.1303	0.480837
	UQCC1	-0.130371	0.544991
	OPA1	-0.130718	0.62603
	FAHD2A	-0.131387	0.345212
	MRPL42	-0.133184	0.267481
	MRPL38	-0.135617	0.372619
	MRPL52	-0.139205	0.330707
	DUS2	-0.141465	0.328683
	MRPL24	-0.147138	0.485872
	FTH1	-0.147535	0.322002
	MTPAP	-0.150345	0.633203
	LRPPRC	-0.152058	0.413548
	ISCU	-0.152422	0.4625
	TFB2M	-0.152535	0.366116
	RCC1L	-0.156322	0.51504
	MRPS18A	-0.156814	0.483254
	MRPL51	-0.15736	0.403891
	UQCC2	-0.157572	0.967897
	HDHD5	-0.159126	0.545306
	RMDN3	-0.159728	0.953462
	LIG3	-0.16019	2.62958
	THG1L	-0.160744	1.17956
	COX7A2L	-0.160855	0.970939
	MRPL17	-0.160961	0.485623
	PNPT1	-0.164401	0.628978
	ELAC2	-0.16447	0.548103
	COQ8A	-0.166185	0.467657
	OGDH	-0.167999	0.571298
	NIF3L1	-0.169495	0.940263
	MCU	-0.171509	1.14252
	MTO1	-0.171953	0.451886
	DHRS7B	-0.173029	1.76837
	SLC25A3	-0.173917	0.763992
	COX4I1	-0.174962	1.11256
	TOMM22	-0.176488	0.88837
	SLIRP	-0.177111	0.499341
	BCS1L	-0.17762	1.15478
	GHITM	-0.179246	0.659712
	ME2	-0.180319	0.506665
	OPA1	-0.181171	1.27469
	DLAT	-0.182092	0.799619
	TRIT1	-0.184563	0.375213
	FARS2	-0.1848	0.281897
	MRPL3	-0.185738	0.548268
	MRPL30	-0.186017	0.542369
	PRXL2A	-0.188644	0.397271
	IMMT	-0.189427	1.25549
	GRSF1	-0.190717	0.481768
	ACSS3	-0.191255	0.610387
	MRPL32	-0.191754	0.390083
	ABCB7	-0.192549	0.981865
	SLC25A15	-0.196617	0.76368
	AGPAT5	-0.200667	3.82024
	CPT2	-0.204687	1.40356
	RDH14	-0.207308	1.78412
	COA6	-0.209604	1.14595
	TAMM41	-0.212153	1.32959
	OXSM	-0.214369	0.862855
	RPUSD4	-0.215978	0.288341
	MRPL43	-0.217479	0.76889
	HIGD1A	-0.217688	0.566881
	BCKDK	-0.219108	0.808588
	MALSU1	-0.219862	0.446124
	MRPL16	-0.220938	0.764089
	ATP5F1C	-0.222798	1.38253
	OXA1L	-0.226923	0.72513
	MRPL55	-0.227214	0.813109
	PCCB	-0.227616	1.03438
	MRPL14	-0.233828	0.693927
	SLC25A32	-0.233894	0.80245
	CLPP	-0.234081	0.722011
	UQCC3	-0.23459	0.719486
	ATP5F1B	-0.239053	1.56158
	NBR1	-0.240796	0.895365
	HTATIP2	-0.241396	1.35503
	HSD17B4	-0.241463	1.76838
	TOMM5	-0.244765	1.00844
	MTERF4	-0.247447	0.749201
	TMEM186	-0.248295	1.66948
	MTERF3	-0.248752	0.512584
	RHOT2	-0.24918	1.30733
	COX5A	-0.249969	0.495537
	METTL15	-0.252334	0.497093
	HSDL2	-0.253467	1.03611
	PRDX6	-0.253575	2.54807
	MICOS10	-0.257635	1.19299
	SLC25A6	-0.258809	1.17474
	ATP5F1A	-0.260705	1.67087
	TIMM17A	-0.263267	0.668987
	RMND1	-0.264361	0.863232
	TIMM21	-0.26565	0.883286
	OPA3	-0.266075	1.8024
	APOO	-0.266992	1.93308
	TIMM10	-0.267504	0.639927
	MCEE	-0.269777	1.02965
	CARS2	-0.276696	0.858817
	PLPBP	-0.276956	1.53113
	SUOX	-0.278102	0.860303
	PCCA	-0.281509	0.971562
	STOML2	-0.283581	1.88768
	ATP5F1B	-0.284288	1.29234
	SUCLG1	-0.284308	0.99282
	ATP5MG	-0.284799	1.63727
	PHB2	-0.28753	1.66896
	PXMP2	-0.287551	0.990606
	MICOS13	-0.288106	1.75156
	IARS2	-0.295075	1.27592
	NDUFA5	-0.295136	2.01889
	DCAKD	-0.296313	2.0736
	STAR	-0.296457	0.99518
	IDI1	-0.29748	0.758322
	VPS13D	-0.303212	1.21385
	HADH	-0.304079	1.449
	TIMM9	-0.307118	0.895376
	SLC25A21	-0.310816	1.86751
	METTL17	-0.313022	1.06154
	PHB	-0.317117	1.66229
	COMTD1	-0.321534	0.689088
	MCL1	-0.323913	1.89973
	NDUFS7	-0.324955	2.7632
	ATAD3A	-0.326526	1.86102
	BCL2L1	-0.327316	1.57797
	ALDH9A1	-0.328264	1.38061
	FAM210A	-0.328346	1.96738
	ATP5F1D	-0.329	1.82893
	NRDC	-0.33012	1.76961
	ATP5PO	-0.330946	1.82381
	PGAM5	-0.336006	1.3557
	YME1L1	-0.336679	1.23144
	ATP5PB	-0.339419	1.8608
	ATP5F1E	-0.339913	2.4072
	COX10	-0.340928	1.13955
	ACAA1	-0.34622	2.50112
	SPTLC2	-0.346467	3.16908
	AHCYL1	-0.348156	1.03162
	COQ8B	-0.350186	0.615045
	NADK2	-0.351257	1.07394
	TOMM7	-0.353745	1.50165
	SLC25A13	-0.355022	2.43797
	IMMT	-0.358262	2.03481
	FASTKD3	-0.36141	1.02882
	ALDH3A2	-0.362049	4.49497
	MYO19	-0.365015	2.20468
	SLC30A9	-0.368076	3.12132
	SLC25A24	-0.369668	3.1525
	TMEM70	-0.370921	2.0739
	ECSIT	-0.371889	1.92852
	MICU1	-0.37834	2.65715
	CISD1	-0.378536	1.9168
	WARS2	-0.378824	1.81945
	RAB5IF	-0.38156	2.52603
	COX15	-0.383356	1.55765
	ATP5ME	-0.38679	2.16923
	ATP5PD	-0.3878	2.4496
	ECHS1	-0.391537	1.16611
	DNAJC30	-0.391687	0.964976
	RPIA	-0.393972	3.61582
	MDH2	-0.394381	1.43166
	SPG7	-0.396306	2.23426
	CHCHD4	-0.39801	2.15925
	NDUFAF1	-0.400838	2.59863
	ATAD3B	-0.405661	2.45276
	ARF5	-0.40664	3.17165
	NDUFS3	-0.407518	2.336
	COX19	-0.40851	2.81013
	SUCLG2	-0.411961	1.33617
	ATAD1	-0.41735	1.86845
	MTFR1L	-0.417423	3.39497
	NSUN2	-0.421044	2.47534
	NDUFS8	-0.421931	1.76463
	MTX3	-0.434723	2.23626
	NDUFS2	-0.436106	2.43784
	NGRN	-0.436697	1.78408
	DUT	-0.439112	2.23812
	VDAC2	-0.439231	3.28976
	CPT1A	-0.44286	2.32165
	DHODH	-0.450735	2.19671
	ISOC2	-0.452437	1.34534
	CHCHD3	-0.455704	2.33041
	SCO1	-0.457601	2.27884
	FKBP10	-0.459376	2.10236
	GDAP1	-0.461516	2.20545
	OXCT1	-0.476596	1.54705
	ABCB6	-0.481869	1.94466
	FKBP8	-0.481992	4.86869
	GTPBP10	-0.483176	1.61281
	ABCB10	-0.483596	2.94892
	PLSCR3	-0.488071	1.78671
	ATP5MC1	-0.491974	0.86524
	MICU2	-0.518676	1.46557
	KARS1	-0.525374	4.90171
	FH	-0.52619	1.74108
	SCP2	-0.530027	1.90249
	NOA1	-0.530539	1.6109
	NDUFA9	-0.544943	2.67006
	SFXN2	-0.545084	2.19445
	TMEM205	-0.546387	2.62162
	ETHE1	-0.550037	2.71926
	FASTKD2	-0.555449	1.49498
	ARMC10	-0.561788	3.7945
	MRRF	-0.56359	1.79824
	SLC25A40	-0.568688	2.05902
	MT-CO1	-0.574831	2.89992
	RIDA	-0.577175	2.94547
	UQCRFS1	-0.58063	2.68156
	COX7C	-0.584194	3.2117
	PARK7	-0.586337	3.33869
	NME3	-0.593666	4.28845
	VARS2	-0.594855	2.26082
	TOMM20	-0.595316	2.52575
	MT-ATP8	-0.598524	2.56194
	DBT	-0.59888	4.28182
	SDHAF3	-0.60353	1.21677
	DLD	-0.607688	2.34938
	CAT	-0.613556	2.70644
	DNAJC15	-0.615465	0.892916
	COX6C	-0.621568	2.77929
	TFB1M	-0.645667	2.06854
	TFAM	-0.647025	3.32616
	GOLPH3	-0.65113	3.45951
	NDUFA4	-0.661198	3.03533
	MTHFD2	-0.662709	1.78048
	UQCRQ	-0.664503	3.72874
	HMGCL	-0.665988	1.85679
	MT-CO2	-0.667329	3.35865
	FIS1	-0.669339	5.15144
	DDX28	-0.670759	1.85293
	NDUFA8	-0.681828	3.76284
	ERAL1	-0.683995	2.18097
	NDUFB7	-0.686854	3.60732
	MECR	-0.687674	2.60343
	NDUFV1	-0.688232	3.37972
	COX7A2	-0.68933	3.59461
	UQCRC1	-0.690964	3.20635
	MMADHC	-0.693487	1.36523
	PRDX2	-0.694728	2.59189
	COX6B1	-0.701095	1.68592
	CHPT1	-0.702734	1.40756
	NDUFC2	-0.724693	3.38443
	ACADM	-0.724846	2.23427
	TTC19	-0.728931	2.87053
	PRORP	-0.734921	2.94661
	COA7	-0.738126	2.63527
	MTIF3	-0.741486	2.68951
	MIPEP	-0.745127	3.33643
	RTN4IP1	-0.747027	2.04325
	MT-CO3	-0.748128	2.27693
	ECHDC1	-0.755737	4.35436
	NDUFV2	-0.756766	3.27113
	UQCRC2	-0.757431	3.60978
	NDUFB4	-0.758148	4.22708
	CHPT1	-0.758223	2.0046
	NNT	-0.768601	4.55054
	RMDN1	-0.777883	4.06013
	PPA2	-0.779886	3.01814
	ETFDH	-0.800257	3.76512
	CRAT	-0.80748	2.25143
	NDUFA13	-0.80916	3.99553
	CRYZ	-0.815338	2.78846
	NDUFA10	-0.817277	4.02457
	PNPLA8	-0.823122	2.15055
	NDUFA6	-0.834893	2.40281
	NDUFA12	-0.834933	3.53876
	NDUFC1	-0.84189	2.80057
	NDUFA2	-0.853109	3.84974
	BOK	-0.855501	3.97558
	BNIP3	-0.863753	4.68521
	UQCRB	-0.868395	4.40772
	SLC25A30	-0.876062	3.42394
	MT-ND4	-0.884406	2.73999
	MT-ATP6	-0.903278	3.6006
	MT-ND3	-0.905003	1.60912
	NDUFS5	-0.908509	4.27512
	NDUFS1	-0.948124	3.97492
	NDUFS4	-0.95213	4.70275
	IDE	-0.956213	6.17227
	XPNPEP3	-0.960498	4.20423
	MT-ND6	-0.967888	1.6807
	NDUFB2	-0.968489	1.50393
	LYRM1	-0.980862	3.04816
	NDUFA7	-0.984554	4.83564
	NDUFB3	-1.00017	3.90968
	LIAS	-1.03231	2.90393
	CKMT1A	-1.05421	1.84151
	NDUFS6	-1.06784	3.68078
	NDUFB8	-1.08547	4.27784
	ABCD3	-1.09277	4.49236
	CROT	-1.15326	4.02046
	COX5B	-1.16277	2.05867
	SND1	-1.16558	7.27413
	NDUFV3	-1.17393	1.84395
	MMAA	-1.17694	2.95521
	VWA8	-1.18183	4.6244
	MTARC2	-1.20448	3.84057
	MT-CYB	-1.21711	2.46316
	NDUFB9	-1.2518	3.88232
	MT-ND5	-1.33269	4.68186
	OMA1	-1.34044	3.35886
	SDHA	-1.95041	4.95271
	SDHC	-2.09561	4.13214
	SDHD	-2.88197	5.27066
	SDHB	-5.27154	6.12985

## Sheet: 7G
			WT				AB				EP				LP
		MT-ND5	0.963119	1.05201	1.10623	0.878638	0.944836	1.20416	1.17894	1.1657	0.680887	0.731323	0.654198	0.686981	0.387517	0.40496	0.385205	0.410423
		NDUFB9	0.950611	1.02957	1.15339	0.866426	1.05753	1.1878	1.17029	1.10331	0.684538	0.714033	0.748137	0.673784	0.389892	0.443352	0.361011	0.485444
		NDUFS6	1.09163	0.962486	1.09125	0.854629	1.02427	1.0905	1.10459	1.07129	0.638157	0.678651	0.616396	0.639576	0.394058	0.528975	0.457827	0.527272
		NDUFB3	1.00654	0.98015	1.13023	0.883079	1.02009	1.30211	1.19923	1.36287	0.695231	0.707819	0.688695	0.660131	0.49528	0.541031	0.428226	0.535222
		NDUFA7	0.943063	1.00067	1.10653	0.949744	0.935491	1.2685	1.26628	1.20941	0.710712	0.768911	0.726152	0.75837	0.502116	0.490981	0.495435	0.532997
		NDUFS4	0.964375	1.00401	1.09847	0.933147	0.985737	1.26705	1.29261	1.27245	0.761394	0.812783	0.781641	0.797083	0.493383	0.48978	0.51689	0.567421
		NDUFS5	0.960419	1.00554	1.1042	0.929841	0.987735	1.17134	1.18765	1.22407	0.755886	0.795026	0.646485	0.755207	0.494003	0.499847	0.530561	0.60653
		NDUFA10	1.01031	0.986897	1.10011	0.902685	1.07856	1.1647	1.12143	1.18939	0.702114	0.756974	0.658552	0.708695	0.546794	0.559781	0.526935	0.636538
		NDUFS1	1.02124	0.983411	1.10927	0.886078	1.03716	1.26121	1.2716	1.2656	0.726866	0.774151	0.751773	0.762865	0.46386	0.523443	0.494994	0.590926

## Sheet: 7H
		Time (mins)	Neg. Ctrl		LP SDHB KO		EP SDHB KO		WT
		0	0.0457	0.0405	0.0416	0.0383	0.0468	0.0399	0.0432	0.0434
		0.5	0.0445	0.0394	0.0415	0.0392	0.0462	0.0418	0.046	0.0457
		1	0.0432	0.0401	0.0423	0.0399	0.0477	0.0432	0.0473	0.0466
		1.5	0.0454	0.0408	0.0437	0.041	0.0496	0.0438	0.0482	0.0475
		2	0.0442	0.0401	0.0442	0.0411	0.0502	0.045	0.05	0.0492
		2.5	0.0441	0.0406	0.0449	0.0421	0.0516	0.0464	0.051	0.0502
		3	0.0458	0.0404	0.0457	0.0433	0.0534	0.05	0.0539	0.0493
		3.5	0.0439	0.0409	0.0464	0.0435	0.0574	0.0498	0.0551	0.053
		4	0.0435	0.0408	0.0472	0.0442	0.0555	0.0502	0.0561	0.0545
		4.5	0.0444	0.0407	0.0473	0.0445	0.0579	0.0505	0.0564	0.0562
		5	0.0457	0.0409	0.0484	0.0457	0.0583	0.0543	0.0595	0.0569
		5.5	0.0451	0.0414	0.0497	0.0463	0.0595	0.0538	0.0613	0.058
		6	0.044	0.0415	0.0501	0.0466	0.0631	0.0552	0.0625	0.0608
		6.5	0.0464	0.0421	0.0506	0.0477	0.0637	0.0567	0.0641	0.0614
		7	0.0446	0.0415	0.0522	0.0482	0.0642	0.0573	0.0656	0.0633
		7.5	0.0449	0.0418	0.0521	0.0492	0.0633	0.0585	0.0674	0.0653
		8	0.0453	0.042	0.0533	0.0501	0.0652	0.0596	0.0698	0.0673
		8.5	0.0448	0.0419	0.0545	0.0509	0.068	0.0615	0.0712	0.068
		9	0.0456	0.0422	0.055	0.0519	0.07	0.0618	0.071	0.07
		9.5	0.0461	0.043	0.0562	0.0531	0.0722	0.0644	0.0743	0.0714
		10	0.0462	0.0433	0.0577	0.054	0.0716	0.0665	0.0754	0.0735
		10.5	0.0463	0.0429	0.0579	0.0542	0.0719	0.0668	0.0768	0.0756
		11	0.0452	0.0428	0.0591	0.0549	0.0741	0.0689	0.0792	0.0767
		11.5	0.0454	0.0428	0.0594	0.0557	0.0752	0.0702	0.0812	0.0785
		12	0.0464	0.0433	0.0612	0.0572	0.0776	0.0722	0.083	0.08
		12.5	0.0458	0.043	0.0618	0.0577	0.0783	0.0723	0.0845	0.0818
		13	0.0464	0.0434	0.0623	0.0592	0.0799	0.0742	0.0861	0.0837
		13.5	0.0477	0.044	0.0634	0.0593	0.0809	0.0748	0.0875	0.085
		14	0.0472	0.0438	0.0644	0.0601	0.0822	0.0767	0.09	0.0868
		14.5	0.0489	0.0437	0.0648	0.0613	0.0841	0.0777	0.0921	0.0883
		15	0.0486	0.0436	0.0662	0.0624	0.0857	0.079	0.0916	0.0904
		15.5	0.0464	0.044	0.0668	0.0628	0.0868	0.0798	0.0946	0.0919
		16	0.0464	0.0435	0.0678	0.0636	0.0881	0.0814	0.0967	0.0939
		16.5	0.0469	0.0439	0.0688	0.0648	0.0916	0.0824	0.0976	0.0955
		17	0.0475	0.0447	0.0705	0.0662	0.0929	0.0868	0.1009	0.0969
		17.5	0.0488	0.0442	0.0708	0.0669	0.092	0.0859	0.1026	0.0991
		18	0.0475	0.0442	0.0714	0.0674	0.0938	0.0868	0.1035	0.1004
		18.5	0.0467	0.0441	0.0726	0.0686	0.0963	0.0882	0.1053	0.1021
		19	0.0473	0.0444	0.0732	0.0696	0.0975	0.0901	0.107	0.1041
		19.5	0.048	0.0446	0.0749	0.0704	0.0985	0.0918	0.1088	0.1057
		20	0.0481	0.045	0.0753	0.0712	0.0989	0.0925	0.1108	0.1075
		20.5	0.0486	0.0456	0.0772	0.0727	0.1024	0.0968	0.113	0.1078
		21	0.0483	0.046	0.0785	0.0735	0.1025	0.0962	0.1146	0.1097
		21.5	0.048	0.0457	0.0787	0.0745	0.106	0.0972	0.117	0.1132
		22	0.0486	0.0456	0.0799	0.0751	0.1049	0.0986	0.1175	0.1149
		22.5	0.0488	0.0455	0.0805	0.0758	0.1082	0.0996	0.1198	0.1167
		23	0.0487	0.0455	0.0819	0.077	0.1097	0.1013	0.1208	0.1184
		23.5	0.0486	0.0457	0.0832	0.0784	0.1107	0.1033	0.1239	0.1203
		24	0.049	0.0464	0.0836	0.0789	0.1125	0.1045	0.1255	0.1222
		24.5	0.0497	0.0463	0.0853	0.0807	0.1153	0.1076	0.1277	0.1239
		25	0.0498	0.0462	0.0857	0.081	0.1146	0.1072	0.1285	0.1251
		25.5	0.0492	0.0468	0.0871	0.0819	0.1186	0.1085	0.1293	0.1275
		26	0.0494	0.0466	0.0879	0.0829	0.1168	0.1103	0.1329	0.1292
		26.5	0.0513	0.0467	0.0892	0.0843	0.1196	0.1121	0.1345	0.1315
		27	0.0497	0.0468	0.0898	0.0853	0.1212	0.1155	0.1369	0.1328
		27.5	0.0502	0.0468	0.0909	0.0861	0.1231	0.1151	0.1387	0.1345
		28	0.0491	0.0464	0.0914	0.0865	0.1232	0.1157	0.1396	0.1365
		28.5	0.0494	0.047	0.093	0.088	0.1244	0.1179	0.142	0.138
		29	0.0499	0.0469	0.094	0.089	0.1282	0.1196	0.1444	0.1401
		29.5	0.0499	0.0474	0.0946	0.0901	0.1287	0.121	0.1456	0.142
		30	0.0501	0.0469	0.0967	0.0908	0.13	0.1221	0.1475	0.144
		30.5	0.0499	0.0475	0.0967	0.0915	0.1316	0.1236	0.1499	0.1458
		31	0.0507	0.0472	0.0982	0.0933	0.1339	0.125	0.1511	0.1477
		31.5	0.0511	0.0471	0.1004	0.0944	0.1356	0.127	0.1532	0.1496
		32	0.0514	0.0487	0.1015	0.0958	0.1391	0.1309	0.1562	0.1511
		32.5	0.0511	0.0493	0.1022	0.0966	0.1417	0.1328	0.1578	0.1508
		33	0.0509	0.0476	0.103	0.0971	0.1398	0.1317	0.159	0.1551
		33.5	0.0509	0.0482	0.104	0.098	0.1414	0.1332	0.1612	0.1573
		34	0.0514	0.0481	0.1053	0.0995	0.1444	0.135	0.1627	0.1589
		34.5	0.0513	0.048	0.106	0.1007	0.1453	0.1367	0.1654	0.1609
		35	0.0514	0.048	0.1072	0.1014	0.1476	0.138	0.1672	0.1619
		35.5	0.051	0.0486	0.1084	0.1025	0.1487	0.1414	0.1697	0.1646
		36	0.0517	0.0492	0.1097	0.1031	0.15	0.1411	0.1718	0.1665
		36.5	0.051	0.0485	0.1105	0.1041	0.1511	0.1424	0.1724	0.1683
		37	0.0514	0.0495	0.1112	0.1053	0.1531	0.1443	0.1745	0.1698
		37.5	0.0521	0.0487	0.1126	0.1063	0.1559	0.1459	0.1773	0.1724
		38	0.0524	0.0484	0.1135	0.1074	0.1563	0.1476	0.1794	0.1744
		38.5	0.052	0.0494	0.1153	0.1087	0.1583	0.1489	0.1806	0.1762
		39	0.0524	0.0492	0.1157	0.11	0.1609	0.1499	0.1822	0.1782
		39.5	0.0527	0.0491	0.1175	0.1111	0.1612	0.1517	0.1843	0.1801
