# Supplementary material for: Mitochondrial redox adaptations enable alternative aspartate synthesis in SDH-deficient cells
Source: eLife journal article supplement (doi:10.7554/elife.78654), 2023-03-08
Supplement: supp [file Figure 8-figure supplement 1-source data.xlsx]

## Sheet: S8A
	Time (mins)	Neg Ctrl			WT 143B			WT UOK269
	0	0.0329	0.0332	0.0377	0.04	0.0371	0.0352	0.0323	0.0328	0.0331
	0.5	0.033	0.0369	0.0365	0.0405	0.0369	0.0356	0.034	0.0345	0.0356
	1	0.0336	0.0373	0.0369	0.0416	0.0376	0.0364	0.034	0.0345	0.0365
	1.5	0.0338	0.037	0.0367	0.0423	0.0391	0.037	0.0339	0.0345	0.0359
	2	0.0338	0.0375	0.0361	0.0429	0.0392	0.0376	0.0332	0.0336	0.0362
	2.5	0.0343	0.0376	0.0372	0.0439	0.0403	0.0388	0.0346	0.0349	0.0365
	3	0.0338	0.0374	0.0378	0.0449	0.0407	0.0399	0.0344	0.0348	0.0366
	3.5	0.0338	0.0367	0.0368	0.0454	0.0417	0.0406	0.0346	0.0349	0.036
	4	0.034	0.0374	0.0373	0.0464	0.0419	0.0412	0.0343	0.0349	0.0366
	4.5	0.0343	0.0375	0.038	0.0483	0.0438	0.0421	0.0345	0.0344	0.0369
	5	0.0337	0.0374	0.038	0.0479	0.0449	0.0435	0.0348	0.0351	0.0367
	5.5	0.0342	0.0376	0.0381	0.0491	0.0454	0.0437	0.0347	0.035	0.0367
	6	0.0344	0.0374	0.0379	0.0501	0.0456	0.0447	0.0344	0.0349	0.0368
	6.5	0.0352	0.0374	0.0382	0.0497	0.0456	0.0445	0.0347	0.0348	0.0368
	7	0.0342	0.0359	0.0363	0.0513	0.0471	0.0454	0.0347	0.0351	0.0357
	7.5	0.0344	0.0371	0.0385	0.0518	0.0481	0.0468	0.0348	0.0352	0.037
	8	0.034	0.0375	0.0386	0.0537	0.0507	0.0475	0.0351	0.0355	0.0373
	8.5	0.0342	0.0376	0.0378	0.0531	0.048	0.0478	0.0349	0.0352	0.0373
	9	0.0348	0.0379	0.0373	0.0548	0.0518	0.0505	0.035	0.0354	0.0375
	9.5	0.0344	0.0375	0.0379	0.0552	0.0513	0.049	0.0352	0.0353	0.0373
	10	0.0337	0.0375	0.0376	0.0565	0.0525	0.05	0.0349	0.0354	0.0375
	10.5	0.0341	0.0377	0.0372	0.0572	0.0525	0.0503	0.0352	0.0356	0.0375
	11	0.0346	0.0371	0.0383	0.0575	0.0526	0.0504	0.0345	0.0352	0.0369
	11.5	0.0333	0.0374	0.0377	0.0579	0.0547	0.0517	0.0346	0.0355	0.037
	12	0.034	0.0374	0.0372	0.0595	0.0535	0.0523	0.0354	0.0356	0.0372
	12.5	0.034	0.0375	0.0383	0.0599	0.0556	0.0531	0.0358	0.0356	0.0373
	13	0.0339	0.0373	0.0361	0.0609	0.0558	0.0535	0.0358	0.0357	0.0371
	13.5	0.0345	0.0367	0.0359	0.0608	0.0548	0.0543	0.035	0.0354	0.0368
	14	0.0343	0.0371	0.036	0.0613	0.0554	0.0538	0.0352	0.0357	0.0372
	14.5	0.0342	0.0367	0.0357	0.0622	0.0561	0.0548	0.0349	0.0355	0.0374
	15	0.0339	0.0369	0.0355	0.0617	0.0573	0.055	0.0347	0.0353	0.0375
	15.5	0.0344	0.0364	0.0353	0.0626	0.0572	0.0556	0.0343	0.0354	0.0369
	16	0.0348	0.0372	0.0358	0.0633	0.0584	0.0563	0.0348	0.0355	0.0376
	16.5	0.0346	0.036	0.0351	0.0636	0.059	0.0569	0.0349	0.0353	0.0375
	17	0.0343	0.0363	0.035	0.0642	0.0593	0.0573	0.0349	0.0356	0.0372
	17.5	0.0345	0.037	0.0354	0.0657	0.0605	0.0581	0.035	0.0356	0.0377
	18	0.0348	0.0371	0.0363	0.0664	0.0604	0.0588	0.035	0.0354	0.0379
	18.5	0.0345	0.0365	0.0379	0.0675	0.0635	0.0613	0.0347	0.0357	0.0372
	19	0.0353	0.0363	0.0353	0.0657	0.0646	0.0606	0.0351	0.0352	0.0379
	19.5	0.0337	0.0357	0.0374	0.0681	0.0639	0.0605	0.0352	0.0354	0.0378
	20	0.0339	0.0349	0.0374	0.0686	0.0645	0.0617	0.0346	0.0348	0.0368
	20.5	0.0341	0.0358	0.0381	0.071	0.0663	0.0633	0.0355	0.0353	0.0384
	21	0.0344	0.0363	0.0367	0.0708	0.0663	0.0634	0.0355	0.0346	0.0385
	21.5	0.0342	0.0363	0.0367	0.0716	0.067	0.0632	0.0353	0.0351	0.0383
	22	0.0335	0.0365	0.0367	0.0717	0.0674	0.0646	0.0354	0.0347	0.0384
	22.5	0.0328	0.0369	0.0369	0.0734	0.0675	0.0656	0.035	0.0347	0.0373
	23	0.0314	0.0359	0.0353	0.0734	0.0684	0.0671	0.0352	0.0347	0.0384
	23.5	0.0318	0.0349	0.0358	0.0739	0.0681	0.0677	0.0348	0.0342	0.0385
	24	0.0304	0.0334	0.0351	0.0739	0.0696	0.0681	0.0349	0.0343	0.0363
	24.5	0.0328	0.0363	0.0352	0.0742	0.0692	0.0687	0.0352	0.0345	0.038
	25	0.031	0.0376	0.0364	0.0744	0.0677	0.0689	0.035	0.0351	0.0384
	25.5	0.0345	0.0342	0.0356	0.0786	0.0722	0.0686	0.0351	0.0357	0.036
	26	0.0345	0.0367	0.0366	0.0792	0.0725	0.0693	0.0357	0.0354	0.0385
	26.5	0.0326	0.0371	0.0359	0.0791	0.0734	0.07	0.0361	0.0361	0.039
	27	0.0349	0.0371	0.0352	0.0806	0.073	0.0701	0.0349	0.0353	0.0391
	27.5	0.0342	0.0373	0.036	0.0803	0.0739	0.0714	0.0364	0.0365	0.0392
	28	0.0344	0.0372	0.036	0.0816	0.0751	0.072	0.0362	0.0356	0.0393
	28.5	0.0339	0.0366	0.0353	0.0823	0.0754	0.0718	0.0365	0.0361	0.0391
	29	0.0334	0.0373	0.0374	0.0829	0.0761	0.0735	0.0357	0.0351	0.0392
	29.5	0.0333	0.0376	0.0355	0.0823	0.0751	0.0735	0.0366	0.036	0.0396
	30	0.0338	0.0372	0.0351	0.0845	0.0778	0.0742	0.0349	0.0359	0.0394
	30.5	0.0342	0.0369	0.0358	0.0848	0.0782	0.0746	0.0365	0.0357	0.0396
	31	0.0348	0.037	0.0378	0.086	0.0778	0.0766	0.0365	0.0368	0.0398
	31.5	0.0348	0.0373	0.0356	0.0864	0.0792	0.0768	0.0367	0.0363	0.0398
	32	0.0346	0.0376	0.0359	0.0877	0.0796	0.078	0.0371	0.0367	0.0399
	32.5	0.0345	0.0373	0.0362	0.0885	0.0808	0.079	0.0371	0.0365	0.0401
	33	0.033	0.0373	0.038	0.0886	0.0816	0.0782	0.0357	0.0369	0.0398
	33.5	0.0345	0.0375	0.0365	0.0897	0.0821	0.0805	0.0367	0.0367	0.0398
	34	0.0342	0.0375	0.035	0.0904	0.0828	0.0807	0.0372	0.0374	0.0401
	34.5	0.0334	0.0376	0.0376	0.091	0.0834	0.0813	0.0369	0.0373	0.0402
	35	0.0348	0.0375	0.0357	0.0913	0.0834	0.0806	0.0369	0.0367	0.0402
	35.5	0.0343	0.0375	0.0353	0.0923	0.0842	0.0813	0.037	0.0371	0.0402
	36	0.0344	0.037	0.0356	0.093	0.0839	0.083	0.0372	0.0364	0.0403
	36.5	0.0338	0.0372	0.0356	0.0934	0.0849	0.0818	0.0365	0.0364	0.0404
	37	0.0334	0.0375	0.0354	0.0943	0.0849	0.0828	0.037	0.0368	0.0403
	37.5	0.0327	0.0374	0.0357	0.0944	0.0863	0.0836	0.0375	0.0373	0.0404
	38	0.0328	0.0374	0.0359	0.0959	0.0874	0.0846	0.0372	0.037	0.04
	38.5	0.0341	0.0374	0.0355	0.0966	0.0883	0.0847	0.037	0.0378	0.0402
	39	0.0337	0.0376	0.0358	0.097	0.0881	0.0863	0.0376	0.0376	0.0405
	39.5	0.0342	0.0359	0.0351	0.0978	0.0895	0.0858	0.0373	0.0368	0.04
	40	0.0338	0.037	0.0353	0.0981	0.0901	0.0876	0.0372	0.0369	0.0402

## Sheet: S8B
		M+0			M+1			M+2			M+3			M+4
	WT	0.554837	0.555716	0.552648	0	0	0	0.00674037	0.00652376	0.00634872	0.38891	0.387552	0.390592	0.0495131	0.0502085	0.0504111
	SDHB	0.177195	0.175919	0.176416	0.026432	0.0256075	0.0265584	0.104332	0.104898	0.104413	0.103485	0.103239	0.102836	0.588556	0.590337	0.589776

## Sheet: S8C
		M+0			M+1			M+2			M+3			M+4
	WT	0.564126	0.57746	0.577972	0	0	0	0.0199569	0.0184987	0.0197399	0.413001	0.400966	0.39878	0.00291585	0.00307529	0.00350787
	SDHB	0.790293	0.797451	0.792289	0.0162295	0.0155759	0.0160865	0.109491	0.10686	0.109562	0.0735469	0.0710578	0.0723104	0.0104398	0.00905515	0.00975222

## Sheet: S8D
			Untr			+Dox
		269 WT	0.325055	0.362378	0.358077	0.342537	0.359962	0.332296
		269 SDHB	0.351482	0.371803	0.387245	0.366415	0.379664	0.377756

## Sheet: S8E
			Untr			+Dox
		269 WT	1.03983	0.961341	0.998828	1.09418	0.990271	1.14313
		269 +SDHB	3.32476	4.11535	3.8868	4.30655	4.17916	4.42825
			Data were normalized to WT UOK269
