# Supplementary material for: Mitochondrial redox adaptations enable alternative aspartate synthesis in SDH-deficient cells
Source: eLife journal article supplement (doi:10.7554/elife.78654), 2023-03-08
Supplement: supp [file Figure 8-source data.xlsx]

## Sheet: 8B
	Time (minutes)	UOK269 WT			UOK269 SDHB LP
	1.59127	23.3241	28.5358	18.7686	397.229	370.48	425.869
	8.17313	16.8034	17.6793	10.9756	390.452	358.876	417.59
	14.7536	16.8714	18.5308	8.98361	363.855	325.082	403.723
	21.4152	35.8601	24.4857	4.30988	349.757	415.278	422.387
	28.0021	24.5318	19.0442	2.94688	338.785	392.313	391.983
	34.5855	20.1358	16.2519	5.61137	346.157	376.831	396.962
	41.1684	18.8479	16.8183	6.76769	341.021	366.596	400.318
	47.8273	4.0443	-2.06869	1.41961	4.46507	0.785019	-3.41813
	54.4134	-0.91123	-0.98024	-0.60945	3.76614	-0.10506	-0.01193
	60.9979	0.732707	-1.68081	-2.95921	-0.95351	0.868496	-0.11074
	67.5821	0.178526	2.66105	3.56866	-2.81263	-0.76344	0.122664

## Sheet: 8C
		Time (min)	Neg Ctrl			WT UOK269			SDHB UOK269
		0	0.0329	0.0366	0.0332	0.0383	0.0318	0.0333	0.0364	0.0381	0.0451
		0.5	0.033	0.0355	0.0369	0.0373	0.0311	0.0331	0.0379	0.0389	0.045
		1	0.0336	0.0349	0.0373	0.0376	0.0311	0.0328	0.037	0.038	0.0455
		1.5	0.0338	0.0348	0.037	0.0378	0.0308	0.0328	0.0386	0.0393	0.0457
		2	0.0338	0.0352	0.0375	0.0355	0.0306	0.0326	0.039	0.0399	0.0462
		2.5	0.0343	0.0347	0.0376	0.0379	0.0323	0.0334	0.0397	0.0403	0.0462
		3	0.0338	0.035	0.0374	0.0378	0.0315	0.0338	0.0403	0.0408	0.0471
		3.5	0.0338	0.0348	0.0367	0.0375	0.0318	0.0329	0.0409	0.0411	0.0474
		4	0.034	0.0344	0.0374	0.038	0.0318	0.0336	0.0411	0.0411	0.0474
		4.5	0.0343	0.0345	0.0375	0.0384	0.0319	0.0341	0.042	0.0419	0.048
		5	0.0337	0.0342	0.0374	0.0365	0.0328	0.0335	0.0419	0.0419	0.0482
		5.5	0.0342	0.0344	0.0376	0.0386	0.0325	0.0341	0.0426	0.0424	0.0486
		6	0.0344	0.0345	0.0374	0.0367	0.0326	0.0344	0.0433	0.0428	0.0493
		6.5	0.0352	0.0345	0.0374	0.0376	0.0321	0.0336	0.0436	0.0432	0.0496
		7	0.0342	0.0347	0.0359	0.0384	0.0328	0.034	0.0443	0.0435	0.0499
		7.5	0.0344	0.0348	0.0371	0.0384	0.0329	0.0343	0.0449	0.0441	0.0503
		8	0.034	0.0348	0.0375	0.0383	0.0337	0.0346	0.0453	0.0443	0.0509
		8.5	0.0342	0.0351	0.0376	0.0378	0.0331	0.0339	0.0458	0.0451	0.0514
		9	0.0348	0.0353	0.0379	0.0366	0.0334	0.0335	0.0465	0.0451	0.0519
		9.5	0.0344	0.0349	0.0375	0.0389	0.0342	0.0346	0.0468	0.0455	0.0521
		10	0.0337	0.035	0.0375	0.039	0.034	0.0348	0.0474	0.0462	0.0526
		10.5	0.0341	0.0346	0.0377	0.039	0.0324	0.0345	0.0478	0.0464	0.0525
		11	0.0346	0.035	0.0371	0.0383	0.0326	0.0345	0.0485	0.0467	0.0535
		11.5	0.0333	0.0347	0.0374	0.0387	0.034	0.0346	0.0488	0.0471	0.0538
		12	0.034	0.0346	0.0374	0.0377	0.0328	0.0346	0.0493	0.0475	0.054
		12.5	0.034	0.0345	0.0375	0.0393	0.0343	0.0347	0.0495	0.0477	0.0541
		13	0.0339	0.035	0.0373	0.0383	0.0336	0.0342	0.0501	0.0478	0.0547
		13.5	0.0345	0.0347	0.0367	0.0376	0.0332	0.0344	0.0499	0.0478	0.0551
		14	0.0343	0.036	0.0371	0.037	0.0328	0.033	0.0503	0.0481	0.0555
		14.5	0.0342	0.0352	0.0367	0.0374	0.0326	0.0338	0.0507	0.0486	0.0556
		15	0.0339	0.0356	0.0369	0.0378	0.0324	0.033	0.0512	0.0489	0.056
		15.5	0.0344	0.036	0.0364	0.0377	0.0325	0.0334	0.0519	0.0495	0.0566
		16	0.0348	0.0356	0.0372	0.0373	0.0326	0.0335	0.0524	0.0499	0.0573
		16.5	0.0346	0.0351	0.036	0.0374	0.0327	0.0333	0.0526	0.0496	0.0572
		17	0.0343	0.0351	0.0363	0.0366	0.0319	0.033	0.0529	0.0497	0.0574
		17.5	0.0345	0.0358	0.037	0.0374	0.033	0.0334	0.0534	0.0503	0.0577
		18	0.0348	0.0359	0.0371	0.0385	0.0333	0.0333	0.0538	0.0505	0.0583
		18.5	0.0345	0.0355	0.0365	0.0399	0.0355	0.0346	0.0544	0.0506	0.059
		19	0.0353	0.036	0.0363	0.0386	0.0342	0.0331	0.054	0.0514	0.0593
		19.5	0.0337	0.0361	0.0357	0.0397	0.0333	0.0337	0.0545	0.0518	0.0593
		20	0.0339	0.0361	0.0349	0.04	0.0336	0.0338	0.0544	0.0512	0.0596
		20.5	0.0341	0.0351	0.0358	0.0393	0.0343	0.0338	0.0554	0.0524	0.0595
		21	0.0344	0.0355	0.0363	0.0397	0.0353	0.0346	0.0556	0.0525	0.0603
		21.5	0.0342	0.0353	0.0363	0.0397	0.035	0.0339	0.056	0.0529	0.0607
		22	0.0335	0.0362	0.0365	0.0394	0.0349	0.034	0.056	0.0532	0.0612
		22.5	0.0328	0.035	0.0369	0.0388	0.0354	0.0342	0.0582	0.0536	0.061
		23	0.0314	0.0357	0.0359	0.0397	0.0343	0.0338	0.0573	0.0536	0.0618
		23.5	0.0318	0.0353	0.0349	0.0396	0.0348	0.0348	0.0573	0.0537	0.0626
		24	0.0304	0.0345	0.0334	0.0391	0.0352	0.0345	0.058	0.054	0.0628
		24.5	0.0328	0.0355	0.0363	0.04	0.0349	0.0339	0.0583	0.0548	0.0633
		25	0.031	0.0348	0.0376	0.0397	0.0341	0.0336	0.059	0.0553	0.0639
		25.5	0.0345	0.0353	0.0342	0.0393	0.0342	0.0344	0.0604	0.0547	0.0638
		26	0.0345	0.0365	0.0367	0.0387	0.0356	0.0339	0.0612	0.0566	0.0654
		26.5	0.0326	0.0358	0.0371	0.0401	0.0359	0.0343	0.0617	0.0566	0.065
		27	0.0349	0.0362	0.0371	0.0395	0.0364	0.0351	0.0611	0.0567	0.066
		27.5	0.0342	0.0355	0.0373	0.0394	0.0344	0.035	0.0624	0.0569	0.0657
		28	0.0344	0.0345	0.0372	0.04	0.0349	0.0348	0.0631	0.0575	0.0661
		28.5	0.0339	0.0364	0.0366	0.0385	0.0356	0.0345	0.0628	0.058	0.0672
		29	0.0334	0.0357	0.0373	0.0408	0.0362	0.036	0.063	0.0584	0.0674
		29.5	0.0333	0.0359	0.0376	0.0393	0.0357	0.035	0.0644	0.0583	0.0675
		30	0.0338	0.0362	0.0372	0.0397	0.035	0.0356	0.064	0.0584	0.068
		30.5	0.0342	0.0363	0.0369	0.0394	0.0365	0.0348	0.0644	0.0589	0.0685
		31	0.0348	0.035	0.037	0.0403	0.0369	0.0361	0.066	0.0591	0.0683
		31.5	0.0348	0.0362	0.0373	0.0399	0.0369	0.0352	0.0655	0.0595	0.0693
		32	0.0346	0.0364	0.0376	0.0414	0.037	0.0361	0.0662	0.0603	0.0701
		32.5	0.0345	0.0362	0.0373	0.0412	0.0372	0.0363	0.0668	0.0602	0.0688
		33	0.033	0.0362	0.0373	0.0405	0.0363	0.0361	0.0673	0.0608	0.0701
		33.5	0.0345	0.0361	0.0375	0.0394	0.0361	0.0361	0.0675	0.061	0.0704
		34	0.0342	0.0364	0.0375	0.0411	0.0365	0.0353	0.0682	0.0609	0.0711
		34.5	0.0334	0.0343	0.0376	0.0411	0.036	0.0357	0.0682	0.0616	0.0707
		35	0.0348	0.0363	0.0375	0.0392	0.0369	0.0354	0.0688	0.0621	0.0717
		35.5	0.0343	0.0365	0.0375	0.0404	0.0361	0.0364	0.0697	0.0631	0.0722
		36	0.0344	0.0358	0.037	0.0411	0.0357	0.0355	0.0695	0.0623	0.0724
		36.5	0.0338	0.0356	0.0372	0.0395	0.0357	0.0356	0.0706	0.0632	0.0723
		37	0.0334	0.0362	0.0375	0.0408	0.0364	0.036	0.0706	0.0638	0.0739
		37.5	0.0327	0.0357	0.0374	0.0409	0.0373	0.0367	0.0714	0.0636	0.074
		38	0.0328	0.0363	0.0374	0.0408	0.0377	0.0357	0.071	0.0637	0.0748
		38.5	0.0341	0.0367	0.0374	0.0395	0.0376	0.0356	0.0718	0.0649	0.0753
		39	0.0337	0.0358	0.0376	0.0408	0.038	0.0358	0.0731	0.0645	0.0754
		39.5	0.0342	0.0355	0.0359	0.0393	0.0364	0.0349	0.0726	0.0651	0.0754
		40	0.0338	0.0362	0.037	0.0416	0.0372	0.037	0.0735	0.0659	0.0766

## Sheet: 8D
	Time (minutes)	UOK269 WT			UOK269 SDHB LP
	1.59127	23.3241	28.5358	18.7686	397.229	370.48	425.869
	8.17313	16.8034	17.6793	10.9756	390.452	358.876	417.59
	14.7536	16.8714	18.5308	8.98361	363.855	325.082	403.723
	21.4152	35.8601	24.4857	4.30988	349.757	415.278	422.387
	28.0021	24.5318	19.0442	2.94688	338.785	392.313	391.983
	34.5855	20.1358	16.2519	5.61137	346.157	376.831	396.962
	41.1684	18.8479	16.8183	6.76769	341.021	366.596	400.318
	47.8273	4.0443	-2.06869	1.41961	4.46507	0.785019	-3.41813
	54.4134	-0.91123	-0.98024	-0.60945	3.76614	-0.10506	-0.01193
	60.9979	0.732707	-1.68081	-2.95921	-0.95351	0.868496	-0.11074
	67.5821	0.178526	2.66105	3.56866	-2.81263	-0.76344	0.122664

## Sheet: 8E
			Untr			+Dox
		269 WT+pInducerNDI	0.262224	0.308895	0.323293	0.198651	0.221018	0.198381
		269 SDHB+pInducerNDI	0.317546	0.360586	0.351807	0.351152	0.352379	0.319107

## Sheet: 8F
			Untr			+Dox
		269 WT pInducerNDI	0.825568	0.89263	1.12782	0.573148	0.551131	0.626255
		269 +SDHB pInducerNDI	4.51239	4.70948	5.10347	5.25144	4.33292	4.62855

## Sheet: 8G
	Day Post Injection					Standard Chow											DOX chow
	52
	59	20.5292				51.3747			29.3122	16.062	32.8847	6.97337	9.77396	6.70093	21.5653	66.9922	17.2954	5.89781	5.34393	25.2642	13.9633
	66	21.4122	18.2204			76.7682	5.65645	50.3344	65.2294	30.4979	51.628	16.857	19.6875	17.1466	40.9898	77.2659	29.5119	14.0094	8.64216	38.8829	24.0455
	71	27.6897	33.6033			96.1431	14.2824	38.7737	69.3787	44.9081	44.6015	20.905	27.8425	19.9216	44.2341	77.2443	36.4235	19.8874	16.9062	39.819	30.5481
	78	33.7064	34.8509			51.2941	37.7237	33.7689	65.2408	47.594	53.5572	14.1223	14.4834	19.3495	59.9986	66.7777	14.6967	12.0769	19.8874	57.5151	45.4949
	85	18.3192	45.9938		8.4364	136.508	40.1925	52.1326	82.4146	83.3585	97.4072	28.781	23.8676	15.0639	44.7459	79.2662	29.9143	20.6319	21.4862	54.0096	69.7656
	93	31.5143	55.4746		20.4377	156.928	36.142	60.7021	133.131	132.479	139.677	29.0025	18.0976	66.1529	77.8924	20.9292	24.0455	40.9139	55.1585	79.501	42.774
	100	38.2257	65.1136		26.0529	121.356	43.1623	76.6885	106.747	57.1077	89.4736	33.4714	42.774	21.1986	72.7527	82.7004	30.9854	24.4632	47.2951	68.7734	89.5785
	120	42.9787	39.5705		28.7603	130.208	65.7407	87.5474	126.443	73.5603	84.9243	36.4141	39.7911	36.2971	80.897	70.6889	36.9227	31.6838	40.6427	113.906	67.3119
	134	44.4556	50.2983	28.0205	53.6389	262.551	33.0561	72.1933	92.4489	63.4586	88.2818	44.3499	49.2169	17.8038	92.7207	143.695	33.6019	23.4583	16.343	43.6478	85.611
	148	46.7131	55.0492		59.1935	220.904	39.9733	159.583	169.223	164.553	166.377	41.9394	42.6228	24.7701	99.7378	102.369	31.7523	42.9564	25.9646	81.4637	99.2166
	168	56.8455	67.8943	19.0489		265.399	68.0791	180.901	149.027	231.976	278.841	36.9264	46.444	27.4935	129.384	174.627	67.6211	39.7478	45.3004	107.188	108.283
	185	71.3264	44.4071		49.6559	328.246	53.1008	91.432	172.291	149.238	182.85	38.1484	46.444	34.7594	29.7027	125.554	103.588	49.2799	25.2671	230.336	105.427
	198	79.3341	39.7952	94.6301	58.7879	230.634	49.8505	213.952	196.53	271.044	273.564	41.5133	65.3538	40.5907	182.233	95.2926	53.9667	45.5728	36.8937	173.502	166.936
	211	104.766	65.5933	188.157	43.007	200.85	67.4906	214.977	139.952	245.252	279.99	37.7566	45.331	33.073	152.777	181.045	131.287	38.7036	56.423	110.282	129.916
	225	105.982	61.9466	251.489	30.5096	249.806	28.3245	187.811	89.2842	252.146	280.474	42.7017	74.7224	27.7885	160.262	168.621	51.7538	37.8167	53.0688	152.297	127.306
	239	125.14	68.2471	333.357	63.5037	259.767	46.3698	200.152	119.74	288.488	228.561	45.3463	71.8485	39.0183	154.192	141.215	80.3533	41.5544	52.9251	166.567	128.688
	253	156.646	69.4677	468.225	69.6101	393.628	60.5957	245.903	163.418	304.689	233.805	57.818	76.2772	45.8882	154.235	169.059	112.945	47.9438	49.2707	175.68	137.515
	267	175.681	116.828	633.609	66.6589	378.238	41.0333	255.672	170.01	350.069	315.079	43.5393	69.2119	39.2837	157.474	144.438	99.7666	49.722	75.0039	272.035	119.602
