# Supplementary material for: Mitochondrial redox adaptations enable alternative aspartate synthesis in SDH-deficient cells
Source: eLife. 2023 Mar 8;12:e78654. doi: 10.7554/eLife.78654 (PMC10027318; doi:10.7554/eLife.78654)
Supplement: Supplementary file 1. — Organized by tab for each figure; tables include cell line, treatment, and metabolite measured. [file elife-78654-supp1.xlsx]

## Sheet: Figure 1
Figure 1B	Aspartate		Figure 1C	Aspartate		Figure 1D	NAD+	NADH
Vehicle -PYR	188566077		Vehicle -PYR	377848310		Vehicle -PYR	1881865	1299343
Vehicle -PYR	190508710		Vehicle -PYR	371314524		Vehicle -PYR	1913020	1393511
Vehicle -PYR	192106228		Vehicle -PYR	388740614		Vehicle -PYR	1941484	1548362
50 nM Rot -PYR	11539215		0.1 nM Rot -PYR	408740302		50 nM Rot -PYR	1308305	2888134
50 nM Rot -PYR	12735838		0.1 nM Rot -PYR	439824344		50 nM Rot -PYR	1584269	3401700
50 nM Rot -PYR	13412946		0.1 nM Rot -PYR	320077125		50 nM Rot -PYR	1494019	3198222
5 uM AA5 -PYR	16409735		1.5 nM Rot -PYR	305216294		5 uM AA5 -PYR	2098898	1333188
5 uM AA5 -PYR	18464424		1.5 nM Rot -PYR	301642298		5 uM AA5 -PYR	2460283	1698861
5 uM AA5 -PYR	17258208		1.5 nM Rot -PYR	299008911		5 uM AA5 -PYR	1758395	1332915
Vehicle +PYR	287097650		3.125 nM Rot -PYR	361409012		Vehicle +PYR	2458205	1478097
Vehicle +PYR	295374556		3.125 nM Rot -PYR	302854167		Vehicle +PYR	2110448	1408912
Vehicle +PYR	306492453		3.125 nM Rot -PYR	245578726		Vehicle +PYR	2301603	1474477
50 nM Rot +PYR	166325669		6.25 nM Rot -PYR	151569640		50 nM Rot +PYR	1925203	1836936
50 nM Rot +PYR	171445336		6.25 nM Rot -PYR	170414632		50 nM Rot +PYR	2165517	2173094
50 nM Rot +PYR	177921749		6.25 nM Rot -PYR	160744858		50 nM Rot +PYR	2195482	2118272
5 uM AA5 +PYR	34499974		12.5 nM Rot -PYR	127178103		5 uM AA5 +PYR	2726706	829935
5 uM AA5 +PYR	33334607		12.5 nM Rot -PYR	96343638		5 uM AA5 +PYR	2627320	776248
5 uM AA5 +PYR	32662035		12.5 nM Rot -PYR	81014838		5 uM AA5 +PYR	2677029	736168
			25 nM Rot -PYR	61401925
			25 nM Rot -PYR	64297768
			25 nM Rot -PYR	74842522
			50 nM Rot -PYR	37717492
			50 nM Rot -PYR	40922993
			50 nM Rot -PYR	41626277
			50 nM Rot +PYR	400293842
			50 nM Rot +PYR	410697003
			50 nM Rot +PYR	405177173
			Vehicle +PYR	589316643
			Vehicle +PYR	534574741
			Vehicle +PYR	479032545
			5 uM AA5 -PYR	27360790
			5 uM AA5 -PYR	25067944
			5 uM AA5 -PYR	54988362
			5 uM AA5 +PYR	81521398
			5 uM AA5 +PYR	87233660
			5 uM AA5 +PYR	83334910

## Sheet: Supp Figure 1
	Figures S1C, S1D
	Aspartate	M+0	M+1	M+2	M+3	M+4	Sum		Figure S1H	Succinate		Figure S1I	Fumarate
	WT NT	2.41016e+08	875863	1.97998e+06	1.17517e+06	0	2.45047e+08		Untr	27040290		Untr	6330886
	WT 10 uM ASP	1.12908e+08	0	3.28518e+06	0	0	1.16193e+08		Untr	ND		Untr	5217735
	WT 150 uM ASP	2.33345e+08	0	1.17511e+07	950569	0	2.46047e+08		Untr	12458208		Untr	7005926
	WT 150 uM ASP	2.27667e+08	400551	1.14356e+07	1.46777e+06	0	2.40971e+08		5 uM AA5	4030000000		5 uM AA5	4602
	WT 1000 uM ASP	2.21277e+08	706203	2.30557e+07	381577	803675	2.46224e+08		5 uM AA5	4030000000		5 uM AA5	920023
	WT 1000 uM ASP	1.9288e+08	376046	2.65404e+07	160458	0	2.19957e+08		5 uM AA5	4340000000		5 uM AA5	ND
	SLC NT	2.3733e+08	426984	1.21062e+06	728570	0	2.39696e+08
	SLC1A3 10 ASP	1.66385e+08	5.60538e+06	6.00565e+08	2.11527e+06	3.54782e+06	7.78219e+08
	SLC1A3 150 ASP	7.29438e+07	6.77471e+06	1.24438e+09	4.18408e+06	9.27481e+06	1.33756e+09		Figure S1L
	SLC1A3 150 ASP	5.83713e+07	5.03706e+06	1.20998e+09	4.64035e+06	8.06048e+06	1.28609e+09		See previous tab (Figure 1C)
	SLC1A3 1000 ASP	4.20139e+07	4.21879e+06	1.33208e+09	3.13407e+06	7.46569e+06	1.38891e+09
	SLC1A3 1000 ASP	4.88245e+07	6.2929e+06	1.49339e+09	5.1754e+06	1.17292e+07	1.56541e+09
	Figure S1J								Figure S1M
	Aspartate	M+0	M+1	M+2	M+3	M+4	Sum		Succinate	M+0	M+1	M+2	M+3	M+4	Sum
	Vehicle -PYR	12791500	936158	6452921	6647164	59355129	86182872		WT UOK269 Q	335892953	14656685	7225533	22695003	847105956	1227576130
	Vehicle -PYR	16694559	1467448	7782714	7963170	69445885	103353776		WT UOK269 Q	316481100	13726345	6788974	21397559	797491944	1155885922
	Vehicle -PYR	19200268	2107661	10452093	10233556	86945020	128938598		WT UOK269 Q	301430430	13092470	6694444	21415187	785061815	1127694346
	AA5 -PYR	3751977	62871	54916	2190451	2899387	8959602		SDHB UOK269 Q	51651972	6642138	29626696	9255399	313811642	410987847
	AA5 -PYR	3340142	61038	59732	1416510	1514890	6392312		SDHB UOK269 Q	50324226	6439846	28926810	9447026	304719094	399857002
	AA5 -PYR	4994123	135756	67046	3312552	3713130	12222607		SDHB UOK269 Q	55877423	6994396	32586781	10169569	336972767	442600936
	Rotenone -PYR	3262639	78462	13248	1023852	487275	4865476
	Rotenone -PYR	3438901	135946	111305	1233311	562490	5481953		Figure S1N
	Rotenone -PYR	4183354	92845	30329	1213000	626341	6145869		Aspartate	M+0	M+1	M+2	M+3	M+4	Sum
	Vehicle +PYR	141758069	22922116	64268895	27030481	303321179	559300740		WT UOK269 Q	77296874	2890000	2653915	54599178	7502760	144942727
	Vehicle +PYR	138154809	21493806	60477804	25317319	286977101	532420839		WT UOK269 Q	77540246	2717507	2625582	54492365	7608931	144984631
	Vehicle +PYR	139777796	22135682	61598254	26382525	295638582	545532839		WT UOK269 Q	72172239	2561135	2445610	51400865	7152454	135732303
	AA5 +PYR	30588798	811970	187166	7525631	6504031	45617596		SDHB UOK269 Q	98419698	20114170	60453759	72013893	327943392	578944912
	AA5 +PYR	33322319	1058691	246257	8387252	7008512	50023031		SDHB UOK269 Q	94666268	19021133	58858682	69685237	318695571	560926891
	AA5 +PYR	31257250	988881	257519	7483561	5619623	45606834		SDHB UOK269 Q	107771613	22179870	66529959	78838567	361427522	636747531
	Rotenone +PYR	119067678	4908196	3047805	79682783	88043195	294749657
	Rotenone +PYR	127808092	5178688	3255021	84211999	94856868	315310668
	Rotenone +PYR	143016920	5748462	4138460	91347763	112155120	356406725

## Sheet: Figure 2
	Figure 2B	Aspartate		Figure 2G	Aspartate
	Vehicle	559300740		WT DMSO	483233648
	Vehicle	532420839		WT DMSO	475592890
	Vehicle	545532839		WT DMSO	456413307
	Rot	294749657		WT Rot	171001097
	Rot	315310668		WT Rot	221717742
	Rot	356406725		WT Rot	188631178
	AA5	45617596		SDHB KO DMSO	59185232
	AA5	50023031		SDHB KO DMSO	66702947
	AA5	45606834		SDHB KO DMSO	67530343
	AA5+Rot	163321223		SDHB KO Rot	171936868
	AA5+Rot	181788683		SDHB KO Rot	162088714
	AA5+Rot	184938269		SDHB KO Rot	180299204

## Sheet: Supp Figure 2
		A549	HCT116	HEK293T	TF-1
	Figure S2C	Aspartate	Aspartate	Aspartate	Aspartate			Figure S2F	Aspartate		Figure S2G	NAD+	NADH
	Vehicle	354671694	645767066	914981008	10684545024			Vehicle	70883771		Vehicle	1997570	1448289
	Vehicle	350276070	597444006	1025907640	1.22476e+10			Vehicle	84194742		Vehicle	1932803	1161556
	Vehicle	321567015	532447199	953476537	1.23399e+10			Vehicle	68984536		Vehicle	2057322	1387966
	AA5	60723089	47833859	249688363	6.2016e+09			AA5	64682220		AA5	2812293	1777748
	AA5	35698942	21927453	264517529	5.42118e+09			AA5	64014125		AA5	2998406	1619282
	AA5	61334095	35710313	266820060	5.70364e+09			AA5	59385941		AA5	2288814	1250116
	AA5+Rot	121917831	72193697	323900191	9.46969e+09
	AA5+Rot	107511863	71203097	350292443	8.65686e+09
	AA5+Rot	124431168	78699448	388912074	8.75037e+09
	AA5+Metformin	119942544
	AA5+Metformin	89993850
	AA5+Metformin	118385104

## Sheet: Figure 3
Figure 3A	NAD+	NADH		Figure 3F	Aspartate		NAD+	NADH
Vehicle	2018153	1833678		eGFP 143B Vehicle	743078980		1283536	1056868
Vehicle	1301085	1714021		eGFP 143B Vehicle	648890655		1052762	921343
Vehicle	1586607	1370099		eGFP 143B Vehicle	706735009		1033247	1044070
Rot	1289876	2151499		eGFP 143B 50 nM Rotenone	358027779		1137940	1269689
Rot	1007192	1915883		eGFP 143B 50 nM Rotenone	317718512		825719	1466451
Rot	1560176	2392267		eGFP 143B 50 nM Rotenone	354412582		913906	1603681
AA5	1697002	1196631		eGFP 143B 5 uM AA5	59436552		1339028	640692
AA5	1992809	891330		eGFP 143B 5 uM AA5	72110595		1158425	849616
AA5	1623249	1161738		eGFP 143B 5 uM AA5	67574085		1210410	796922
AA5+Rot	1822195	2887030		eGFP 143B AA5+Rotenone	150031372		1309907	1866484
AA5+Rot	1475731	2075922		eGFP 143B AA5+Rotenone	141229228		1523918	2020555
AA5+Rot	1507062	2531295		eGFP 143B AA5+Rotenone	169473045		1894458	2141787
				cytoLbNOX 143B Vehicle	689362363		1367427	1074628
				cytoLbNOX 143B Vehicle	669298507		1245809	1239435
				cytoLbNOX 143B Vehicle	624775559		1099125	1118238
				cytoLbNOX 143B 50 nM Rotenone	346425306		987147	1340985
				cytoLbNOX 143B 50 nM Rotenone	418870529		1385800	1522419
				cytoLbNOX 143B 50 nM Rotenone	375457172		1077846	1355778
				cytoLbNOX 143B 5 uM AA5	68436761		1383626	721673
				cytoLbNOX 143B 5 uM AA5	78451403		1463946	735472
				cytoLbNOX 143B 5 uM AA5	75698048		1248790	724354
				cytoLbNOX 143B AA5+Rotenone	161125702		1464355	2019360
				cytoLbNOX 143B AA5+Rotenone	175550793		1467941	2171862
				cytoLbNOX 143B AA5+Rotenone	171876221		1344211	2126710
				mitoLbNOX 143B Vehicle	524044931		1350594	1160171
				mitoLbNOX 143B Vehicle	495467703		1147992	1192803
				mitoLbNOX 143B Vehicle	443096003		1031924	767599
				mitoLbNOX 143B 50 nM Rotenone	355428006		1296995	1348245
				mitoLbNOX 143B 50 nM Rotenone	376735493		1352599	1348916
				mitoLbNOX 143B 50 nM Rotenone	351910035		1046496	1486575
				mitoLbNOX 143B 5 uM AA5	68535739		1320890	746747
				mitoLbNOX 143B 5 uM AA5	57049894		1549042	866916
				mitoLbNOX 143B 5 uM AA5	62523500		1518470	484634
				mitoLbNOX 143B AA5+Rotenone	73374084		1484052	1448115
				mitoLbNOX 143B AA5+Rotenone	93863063		1175336	1590250
				mitoLbNOX 143B AA5+Rotenone	85734134		1551385	1833940

## Sheet: Supp Figure 3
	Supp 1			Supp 2	cis-Aconitate									Supp 2
	Figure S3D	Aspartate		Figure S3C	M+0	M+1	M+2	M+3	M+4	M+5	M+6			Figure S3E	Aspartate
	DMSO	709767537		DMSO	14161381	854119	31665673	1058981	1636418	2183310	92401			DMSO	709767537
	DMSO	642090444		DMSO	14028345	996272	30089366	1090338	1503910	1937610	83762			DMSO	642090444
	DMSO	645436933		DMSO	12001561	1014458	25950578	947350	1233334	1846416	N/F			DMSO	645436933
	Rotenone	303458306		AA5	3563758	176363	838032	70324	53182	1558711	N/F			AZD	649057568
	Rotenone	239068871		AA5	5437297	131718	1039443	54359	74890	1824119	N/F			AZD	566870946
	Rotenone	362020552		AA5	4825298	132728	779944	23412	123024	1837087	N/F			AZD	589219330
	AA5	74846839		AA5+Rot	7811936	232885	271572	55483	N/F	388355	N/F			AA5	74846839
	AA5	84424986		AA5+Rot	6224836	161373	64744	40597	N/F	292143	N/F			AA5	84424986
	AA5	70783680		AA5+Rot	6202738	279259	314804	91132	15760	460966	N/F			AA5	70783680
	AA5+Rot	174399473		AA5+AZD	4999072	150926	1105986	62584	88013	2196464	28220			AA5+AZD	83379572
	AA5+Rot	160213200		AA5+AZD	5653564	172983	988400	51327	91127	2300194	N/F			AA5+AZD	87741792
	AA5+Rot	156338820		AA5+AZD	4358441	158144	930676	75629	69972	2483417	N/F			AA5+AZD	87570135
	Oligo	477590895
	Oligo	456596466
	Oligo	529803299
	AA5+Oligo	91866062
	AA5+Oligo	84932335
	AA5+Oligo	73371417
	Antim	137761407
	Antim	166897435
	Antim	181394607
	AA5+Antim	137498994
	AA5+Antim	130457091
	AA5+Antim	118066697

## Sheet: Figure 4
														Aspartate (Glucose Tracing)
	Figure 4B								Figure 4D	Aspartate			Figure 4I	M+0	M+1	M+2	M+3	M+4	Sum
	Aspartate	M+0	M+1	M+2	M+3	M+4	Sum		WT DMSO	489851169			PC KO DMSO	656947710	30676155	35019639	14418846	628809	737691159
	WT DMSO Q	261653001	26742628	127210117	165811407	1571228292	2152645445		WT DMSO	643025276			PC KO DMSO	609466206	28431501	33836075	12882957	563197	685179936
	WT DMSO Q	255581183	25024913	116637873	158393146	1572203348	2127840463		WT DMSO	638097413			PC KO DMSO	616518237	27603144	32858939	13213761	661133	690855214
	WT DMSO Q	194510165	19223188	94283731	136273346	1218700484	1662990914		WT BMS	647281108			PC KO Rot	79802800	2738518	382791	3186447	63004	86173560
	WT Rot Q	292675099	13527110	22594754	94012251	634347502	1057156716		WT BMS	646178134			PC KO Rot	77089347	2901470	492620	3119289	66987	83669713
	WT Rot Q	244152456	10288258	21206452	68724704	564339938	908711808		WT BMS	759456595			PC KO Rot	76893248	3033532	446632	3065898	112133	83551443
	WT Rot Q	319030435	14149417	27108959	87321576	740302055	1187912442		WT Rot	223859921			PC KO AA5	15226233	412306	37624	1142133	N/F	16818296
	SDHB KO DMSO Q	87030929	2468988	235065	15495483	222660	105453125		WT Rot	300460895			PC KO AA5	12557013	356433	14663	879531	42144	13849784
	SDHB KO DMSO Q	90928113	2805786	351532	17407816	195042	111688289		WT Rot	218781580			PC KO AA5	13493789	394467	64955	939432	48742	14941385
	SDHB KO DMSO Q	93683293	2508247	398826	17740498	27921	114358785		WT AA5	37224781			PC KO AA5+Rot	25182124	712826	17742	2574119	60969	28547780
	SDHB KO Rot Q	242207719	8665350	969715	34929195	411282	287183261		WT AA5	38195643			PC KO AA5+Rot	16615019	540320	46674	2215211	N/F	19417224
	SDHB KO Rot Q	232329385	8439395	1122728	35064248	347748	277303504		WT AA5	44616028			PC KO AA5+Rot	14774982	518310	33621	2119654	32486	17479053
	SDHB KO Rot Q	252293463	9625584	1195370	40533345	330356	303978118		WT AA5+Rot	73830761			PC KO AA5+Rot+BMS	13023423	367195	N/F	1495630	68090	14954338
									WT AA5+Rot	61699212			PC KO AA5+Rot+BMS	12692759	326721	20953	1248632	29118	14318183
									WT AA5+Rot	68803286			PC KO AA5+Rot+BMS	14183300	442012	46275	1508362	57647	16237596
									WT AA5+Rot+BMS	54023288			PC KO BMS	748804207	35988401	46370568	13615782	659094	845438052
	Figure 4F								WT AA5+Rot+BMS	59145487			PC KO BMS	672293206	32472741	43178564	12302993	611128	760858632
	Aspartate	M+0	M+1	M+2	M+3	M+4	Sum		WT AA5+Rot+BMS	64788610			PC KO BMS	592568863	28333373	36332464	10582499	562848	668380047
	WT DMSO Glc	1540618222	78774348	98899738	57830673	4547834	1780670815						PC AB DMSO	593771449	28327398	38061435	72783147	4143321	737086750
	WT DMSO Glc	1342831324	67300032	82023103	40767261	3463649	1536385369						PC AB DMSO	588801091	27558877	38165802	72521830	4042781	731090381
	WT DMSO Glc	1236250580	62565923	74014175	50406884	3443605	1426681167						PC AB DMSO	616603513	28986378	40534636	76391913	4213571	766730011
	WT Rot Glc	803243444	37744192	31537792	84091628	3851448	960468504						PC AB Rot	93903583	3560642	1760834	25917611	408666	125551336
	WT Rot Glc	639930582	29409579	24096183	78239559	3239765	774915668						PC AB Rot	142518244	5585034	2743239	39445422	720983	191012922
	WT Rot Glc	657482560	29856237	23467680	79795549	3176798	793778824						PC AB Rot	92960136	3553526	1497716	25611466	417988	124040832
	SDHB KO DMSO Glc	32888562	890773	1175436	35883591	279048	71117410						PC AB AA5	10918030	248559	331860	9464908	184586	21147943
	SDHB KO DMSO Glc	33974368	768923	1180210	36101950	272466	72297917						PC AB AA5	11130701	291773	350001	9686590	162936	21622001
	SDHB KO DMSO Glc	40365553	1151133	1686937	47132659	353017	90689299						PC AB AA5	11046613	263860	319847	9337786	158764	21126870
	SDHB KO Rot Glc	98880290	3367323	10606515	178969841	1912844	293736813						PC AB AA5+Rot	20301444	649633	765293	21966672	215848	43898890
	SDHB KO Rot Glc	95584705	2604983	9465552	164105666	1692362	273453268						PC AB AA5+Rot	21534223	690571	789488	24777101	210479	48001862
	SDHB KO Rot Glc	92139862	2819952	8375320	151631180	1445069	256411383						PC AB AA5+Rot	23539588	669493	979921	25120731	254592	50564325
													PC AB AA5+Rot+BMS	16427251	501039	570296	18053612	182238	35734436
													PC AB AA5+Rot+BMS	18502653	554891	661714	20438470	218784	40376512
													PC AB AA5+Rot+BMS	15621805	429633	572866	17995813	206787	34826904
													PC AB BMS	720634083	34307199	51694313	50662609	3023414	860321618
													PC AB BMS	687536729	33523392	52220810	48130237	3053138	824464306
													PC AB BMS	704582712	34589336	52822370	50035528	3015360	845045306

## Sheet: Supp Figure 4
	Figure 4B (PYR)	Aspartate		Figure 4B (AKB)	Aspartate
	Vehicle	78744231		Vehicle	489851169
	Vehicle	81159452		Vehicle	643025276
	Vehicle	134796954		Vehicle	638097413
	Rot	66987864		Rot	223859921
	Rot	109502588		Rot	300460895
	Rot	101450107		Rot	218781580
	AA5	30521441		AA5	37224781
	AA5	24168136		AA5	38195643
	AA5	24948659		AA5	44616028
	AA5+Rot	96232040		AA5+Rot	73830761
	AA5+Rot	81840011		AA5+Rot	61699212
	AA5+Rot	95189629		AA5+Rot	68803286

## Sheet: Figure 5
	Figure 5C	Aspartate		Figure 5E	AKG
	MPC1 KO DMSO	408386931		MPC1 KO DMSO	6160720
	MPC1 KO DMSO	393511429		MPC1 KO DMSO	5780576
	MPC1 KO DMSO	402293979		MPC1 KO DMSO	6086701
	MPC1 KO AA5	20281484		MPC1 KO AA5	5726931
	MPC1 KO AA5	24263643		MPC1 KO AA5	6578641
	MPC1 KO AA5	21308973		MPC1 KO AA5	5608277
	MPC1 KO AA5+Rot	25016104		MPC1 KO AA5+Rot	1496645
	MPC1 KO AA5+Rot	29107489		MPC1 KO AA5+Rot	2156021
	MPC1 KO AA5+Rot	29330623		MPC1 KO AA5+Rot	1672762
	MPC1 AB DMSO	568678906		MPC1 AB DMSO	25269945
	MPC1 AB DMSO	491661043		MPC1 AB DMSO	21207654
	MPC1 AB DMSO	502602852		MPC1 AB DMSO	21597137
	MPC1 AB AA5	33544325		MPC1 AB AA5	10327532
	MPC1 AB AA5	29634688		MPC1 AB AA5	9274900
	MPC1 AB AA5	32522982		MPC1 AB AA5	10018074
	MPC1 AB AA5+Rot	77272177		MPC1 AB AA5+Rot	17682277
	MPC1 AB AA5+Rot	94912321		MPC1 AB AA5+Rot	21689944
	MPC1 AB AA5+Rot	82864782		MPC1 AB AA5+Rot	17987266

## Sheet: Supp Figure 5
		Figure S5B	Alanine
		MPC1 KO DMSO	2206321
		MPC1 KO DMSO	1850489
		MPC1 KO DMSO	1834479
		MPC1 KO AA5	1096247
		MPC1 KO AA5	1163950
		MPC1 KO AA5	1863451
		MPC1 KO AA5+Rot	1803797
		MPC1 KO AA5+Rot	1713790
		MPC1 KO AA5+Rot	1630991
		MPC1 AB DMSO	82187857
		MPC1 AB DMSO	63022064
		MPC1 AB DMSO	64903739
		MPC1 AB AA5	47360533
		MPC1 AB AA5	35446571
		MPC1 AB AA5	38229854
		MPC1 AB AA5+Rot	65980689
		MPC1 AB AA5+Rot	72356067
		MPC1 AB AA5+Rot	65011134

[truncated: 5 more sheets: Figure 6, Supp Figure 6, Figure 7, Figure 8, Supp Figure 8]
