# Supplementary material for: Mitochondrial redox adaptations enable alternative aspartate synthesis in SDH-deficient cells
Source: eLife. 2023 Mar 8;12:e78654. doi: 10.7554/eLife.78654 (PMC10027318; doi:10.7554/eLife.78654)
Supplement: Supplementary file 2. [file elife-78654-supp2.xlsx]

## Sheet: Legend
Tab:	Contents:
proteins	Contains all protein abundance data, these data were used to generate Figure S4F (unsupervised clustering)
	Sample ID: WT; 126, 127N, 127C, 128N. AB; 128C, 129N, 129C, 130N. EP; 130C, 131N, 131C, 132N. LP; 132C, 133N, 133C, 134N.
processed_data	contains data used to generate Figs 4C, 4D, 4E
	include p-values and fold change between sample average comparisons (eg WT/LP)
	mitochondrial proteins are marked with a 1 in last column
MitoPathways	MitoPathways data from MitoCarta 3.0
MitoCarta_GSEA_results	Contains analysis used in Fig. 4C
	ES; Enrichment Score. NES; Normalized Enrichment Score. Size; Pathway size.

## Sheet: Proteins
Protein FDR Confidence: Combined	Master	Accession	Description	Exp. q-value: Combined	Contaminant	Sum PEP Score	Coverage [%]	# Peptides	# PSMs	# Unique Peptides	# AAs	MW [kDa]	calc. pI	Score Sequest HT: Sequest HT	# Peptides (by Search Engine): Sequest HT	Biological Process	Cellular Component	Molecular Function	Pfam IDs	Entrez Gene ID	Ensembl Gene ID	Gene Symbol	Gene ID	Reactome Pathways	WikiPathways	# Protein Pathway Groups	# Razor Peptides	Abundance Ratio: (127N) / (126)	Abundance Ratio: (127C) / (126)	Abundance Ratio: (128N) / (126)	Abundance Ratio: (128C) / (126)	Abundance Ratio: (129N) / (126)	Abundance Ratio: (129C) / (126)	Abundance Ratio: (130N) / (126)	Abundance Ratio: (130C) / (126)	Abundance Ratio: (131N) / (126)	Abundance Ratio: (131C) / (126)	Abundance Ratio: (132N) / (126)	Abundance Ratio: (132C) / (126)	Abundance Ratio: (133N) / (126)	Abundance Ratio: (133C) / (126)	Abundance Ratio: (134N) / (126)	Abundance Ratio: (127C) / (127N)	Abundance Ratio: (128N) / (127N)	Abundance Ratio: (128C) / (127N)	Abundance Ratio: (129N) / (127N)	Abundance Ratio: (129C) / (127N)	Abundance Ratio: (130N) / (127N)	Abundance Ratio: (130C) / (127N)
High	Master Protein	O95881	Thioredoxin domain-containing protein 12 OS=Homo sapiens OX=9606 GN=TXNDC12 PE=1 SV=1	0	FALSE	16.936	50	6	9	6	172	19.2	5.4	21.21	6	other biological processes	ER/Golgi	other molecular function	Pf13899	51060	ENSG00000117862	TXNDC12	B3KQS0; hsa:51060; O95881; Q5T1T4; Q96H50			0	0	0.773	0.785	0.769	0.637	0.587	0.694	0.674	0.265	0.295	0.333	0.293	0.389	0.51	0.448	0.525	1.015	0.995	0.824	0.759	0.898	0.871	0.343
High	Master Protein	O00330	Pyruvate dehydrogenase protein X component, mitochondrial OS=Homo sapiens OX=9606 GN=PDHX PE=1 SV=3	0	FALSE	37.176	12	6	21	6	501	54.1	8.66	72.26	6	other metabolic processes	mitochondrion;other cell component	other molecular function	Pf00198, Pf00364, Pf02817	8050	ENSG00000110435	PDHX	B4DW62; D3DR11; E9PB14; E9PBP7; hsa:8050; O00330; O60221; Q96FV8; Q99783	Glyoxylate metabolism and glycine degradation; Regulation of pyruvate dehydrogenase (PDH) complex; Signaling by Retinoic Acid	Amino acid metabolism	5	0	0.849	0.924	0.892	1.056	1.044	1.054	1.084	0.67	0.835	0.713	0.698	0.727	0.936	0.755	0.934	1.088	1.05	1.244	1.229	1.241	1.277	0.789
High	Master Protein	O76071	Probable cytosolic iron-sulfur protein assembly protein CIAO1 OS=Homo sapiens OX=9606 GN=CIAO1 PE=1 SV=1	0.001	FALSE	4.457	3	1	2	1	339	37.8	4.97	3.19	1	cell organization and biogenesis;protein metabolism;other metabolic processes;other biological processes	cytosol;cytoskeleton;other cell component		Pf00400	9391	ENSG00000144021	CIAO1	A0MNN9; hsa:9391; O76071; Q53FM5	Cytosolic iron-sulfur cluster assembly		1	0	1.537	1.385	1.426	0.958	1.646	1.222	1.242	2.842	2.435	2.118	2.81	1.512	1.246	1.56	1.522	0.901	0.928	0.623	1.071	0.795	0.808	1.85
High	Master Protein	Q53EP0	Fibronectin type III domain-containing protein 3B OS=Homo sapiens OX=9606 GN=FNDC3B PE=1 SV=2	0	FALSE	74.154	13	12	34	12	1204	132.8	5.95	82.66	12		other membranes		Pf00041	64778	ENSG00000075420	FNDC3B	B2RB36; B3KXR8; D3DNQ7; hsa:64778; Q53EP0; Q5U5T8; Q6PIJ3; Q6UXG1; Q6UXZ5; Q8IXB2; Q8NBU7; Q96D78; Q9H5I7; Q9NSQ8			0	0	1.02	0.965	1.084	0.873	0.732	0.736	0.742	0.45	0.419	0.458	0.456	0.732	0.744	0.742	0.832	0.946	1.063	0.856	0.718	0.722	0.728	0.441
High	Master Protein	E5RFK4	Dematin (Fragment) OS=Homo sapiens OX=9606 GN=DMTN PE=1 SV=2	0	FALSE	4.707	12	2	4	1	218	24.9	5.9	5.17	2				Pf16182		ENSG00000158856	DMTN	E5RFK4			0	0
High	Master Protein	Q5XG87	Terminal nucleotidyltransferase 4A OS=Homo sapiens OX=9606 GN=TENT4A PE=1 SV=3	0	FALSE	8.004	5	3	5	2	772	82.3	9.52	9.54	3	cell cycle OR cell proliferation;cell organization and biogenesis;DNA metabolism;RNA metabolism OR transcription;other metabolic processes;stress response;other biological processes	other membranes;ER/Golgi;nucleus	other molecular function	Pf01909, Pf03828	11044	ENSG00000112941	TENT4A	A8K1E2; hsa:11044; M1JCE6; O43289; Q17RZ1; Q5XG87; Q9Y6C1	Signaling by BRAF and RAF1 fusions		1	0	1.189	1.274	0.944	1.101	0.911	0.582	0.981	0.894	0.901	0.66	0.809	0.873	0.991	0.475	1.185	1.071	0.794	0.926	0.767	0.489	0.825	0.752
High	Master Protein	H3BQ52	cAMP-regulated phosphoprotein 19 OS=Homo sapiens OX=9606 GN=ARPP19 PE=1 SV=1	0	FALSE	8.563	52	3	6	2	71	7.7	7.24	12.76	3	cell cycle OR cell proliferation;other biological processes	other cell component	enzyme regulator activity	Pf04667		ENSG00000128989	ARPP19	H3BQ52			0	0	0.752	0.799	0.839	0.571	0.614	0.604	0.62	0.558	0.598	0.584	0.549	0.592	0.843	0.696	0.635	1.063	1.116	0.759	0.817	0.803	0.825	0.743
High	Master Protein	E5RJP2	Vinexin (Fragment) OS=Homo sapiens OX=9606 GN=SORBS3 PE=1 SV=1	0	FALSE	15.8	31	5	8	5	174	19.6	8.56	16.88	5	cell adhesion;cell organization and biogenesis			Pf00018, Pf14604		ENSG00000120896	SORBS3	E5RJP2			0	0	1.089	0.908	1.053	0.998	1.12	1	1.209	1.629	1.664	1.917	1.743	1.104	1.066	0.953	0.807	0.834	0.967	0.917	1.028	0.918	1.111	1.496
High	Master Protein	E9PQ51	Wee1-like protein kinase (Fragment) OS=Homo sapiens OX=9606 GN=WEE1 PE=1 SV=1	0.002	FALSE	3.576	12	1	1	1	162	18.1	5.54	3.39	1	protein metabolism;other metabolic processes		kinase activity;other molecular function	Pf00069		ENSG00000166483	WEE1	E9PQ51		Cell cycle; Ciliary landscape	2	0
High	Master Protein	Q13423	NAD(P) transhydrogenase, mitochondrial OS=Homo sapiens OX=9606 GN=NNT PE=1 SV=3	0	FALSE	86.108	20	20	40	20	1086	113.8	8.09	113.79	20	other metabolic processes;transport;other biological processes	other membranes;mitochondrion	transporter activity;other molecular function	Pf01262, Pf02233, Pf05222, Pf12769	23530	ENSG00000112992	NNT	hsa:23530; Q13423; Q16796; Q2TB60; Q8N3V4	Citric acid cycle (TCA cycle)		1	0	1.004	1.13	1.087	0.689	0.792	0.785	0.785	0.575	0.611	0.586	0.59	0.584	0.582	0.649	0.662	1.126	1.083	0.686	0.789	0.782	0.782	0.573
High	Master Protein	O15066	Kinesin-like protein KIF3B OS=Homo sapiens OX=9606 GN=KIF3B PE=1 SV=1	0	FALSE	27.594	16	8	13	6	747	85.1	7.69	30.41	8	cell cycle OR cell proliferation;cell organization and biogenesis;transport;developmental processes;other biological processes	cytosol;cytoskeleton;other cell component	cytoskeletal activity;other molecular function	Pf00225	9371	ENSG00000101350	KIF3B	B2RMP4; B4DSR5; E1P5M5; hsa:9371; O15066	Intraflagellar transport; COPI-dependent Golgi-to-ER retrograde traffic; Translocation of SLC2A4 (GLUT4) to the plasma membrane; MHC class II antigen presentation; Kinesins		5	1	1.004	1.243	1.212	0.88	1.13	1.107	1.065	1.425	1.385	1.188	1.346	1.319	1.408	1.365	1.294	1.237	1.207	0.877	1.125	1.102	1.061	1.419
High	Master Protein	O75385	Serine/threonine-protein kinase ULK1 OS=Homo sapiens OX=9606 GN=ULK1 PE=1 SV=2	0.009	FALSE	2.138	1	1	1	1	1050	112.6	8.79	1.77	1	cell organization and biogenesis;protein metabolism;other metabolic processes;stress response;developmental processes;signal transduction;other biological processes	other membranes;cytosol;mitochondrion;ER/Golgi;other cytoplasmic organelle;other cell component	kinase activity;other molecular function	Pf00069, Pf12063	8408	ENSG00000177169	ULK1	hsa:8408; O75385; Q9UQ28	RAB GEFs exchange GTP for GDP on RABs; Macroautophagy; TBC/RABGAPs; Receptor Mediated Mitophagy	Target of rapamycin (TOR) signaling; Alzheimer's disease and miRNA effects; Nanoparticle triggered autophagic cell death; PI3K-AKT-mTOR signaling pathway and therapeutic opportunities; Focal adhesion: PI3K-Akt-mTOR-signaling pathway; Neurodegeneration with brain iron accumulation (NBIA) subtypes pathway; Autophagy; 7q11.23 copy number variation syndrome; p53 transcriptional gene network; Malignan…	17	0
High	Master Protein	P62875	DNA-directed RNA polymerases I, II, and III subunit RPABC5 OS=Homo sapiens OX=9606 GN=POLR2L PE=1 SV=1	0	FALSE	5.213	16	1	1	1	67	7.6	7.77	3.43	1	DNA metabolism;RNA metabolism OR transcription;other metabolic processes;stress response;signal transduction;other biological processes	cytosol;nucleus	nucleic acid binding activity;other molecular function	Pf01194	5441	ENSG00000177700	POLR2L	hsa:5441; P52436; P62875; Q6FHX3	Activation of anterior HOX genes in hindbrain development during early embryogenesis; RNA Pol II CTD phosphorylation and interaction with CE during HIV infection; mRNA Capping; RNA Pol II CTD phosphorylation and interaction with CE; mRNA Splicing - Major Pathway; Dual incision in TC-NER; Gap-filling DNA repair synthesis and ligation in TC-NER; Viral Messenger RNA Synthesis; Transcriptional regula…	Pyrimidine metabolism; Cytosolic DNA-sensing pathway	55	0	1.03	1.072	0.936	0.864	0.631	0.722	0.677	1.561	1.602	1.398	1.769	1.403	1.45	1.348	1.169	1.041	0.908	0.838	0.613	0.701	0.657	1.515
High	Master Protein	Q9UIJ7	GTP:AMP phosphotransferase AK3, mitochondrial OS=Homo sapiens OX=9606 GN=AK3 PE=1 SV=4	0	FALSE	44.414	56	11	24	11	227	25.6	9.16	65.03	11	other metabolic processes;stress response	mitochondrion;other cell component	kinase activity;other molecular function	Pf00406, Pf05191	50808	ENSG00000147853	AK3	B4DP58; D3DRI1; E7ET30; hsa:50808; Q5VYW6; Q9H576; Q9HC01; Q9NPB4; Q9UIJ7	Factors involved in megakaryocyte development and platelet production		1	0	0.782	0.95	0.797	1.13	1.064	1.147	1.143	1.056	1.196	1.155	1.218	0.932	1.175	1.034	1.224	1.214	1.019	1.444	1.36	1.466	1.461	1.349
High	Master Protein	O60942	mRNA-capping enzyme OS=Homo sapiens OX=9606 GN=RNGTT PE=1 SV=1	0	FALSE	23.101	14	6	10	6	597	68.5	8.13	28.81	6	protein metabolism;RNA metabolism OR transcription;other metabolic processes;other biological processes	nucleus	other molecular function	Pf00782, Pf01331, Pf03919	8732	ENSG00000111880	RNGTT	E1P513; E1P514; hsa:8732; O43483; O60257; O60351; O60942; Q5TCW8; Q8WUM8	RNA Pol II CTD phosphorylation and interaction with CE during HIV infection; mRNA Capping; RNA Pol II CTD phosphorylation and interaction with CE	mRNA processing; Ciliary landscape	5	0	1.462	1.229	1.079	0.904	1.185	0.715	0.888	1.368	1.426	1.703	1.126	1.72	1.561	0.867	1.074	0.84	0.738	0.618	0.81	0.489	0.607	0.936
High	Master Protein	Q6F5E8	Capping protein, Arp2/3 and myosin-I linker protein 2 OS=Homo sapiens OX=9606 GN=CARMIL2 PE=1 SV=2	0	FALSE	16.783	6	5	7	5	1435	154.6	6.76	18.95	5	cell organization and biogenesis;stress response;other biological processes	plasma membrane;other membranes;cytoskeleton;other cytoplasmic organelle;other cell component	other molecular function	Pf13516, Pf16000, Pf17888	146206	ENSG00000159753	CARMIL2	B8X2Z3; hsa:146206; Q6F5E8			0	0	1.343	1.407	1.419	0.981	0.722	0.75	1.031	2.991	2.73	2.965	2.582	1.717	1.743	1.585	1.665	1.048	1.056	0.73	0.537	0.559	0.767	2.227
High	Master Protein	A0A0D9SG79	Ubiquitin-associated protein 1 (Fragment) OS=Homo sapiens OX=9606 GN=UBAP1 PE=1 SV=1	0	FALSE	15.663	7	2	6	2	528	57.8	5.57	25.5	2	protein metabolism;other metabolic processes	other membranes;other cytoplasmic organelle	other molecular function			ENSG00000165006	UBAP1	A0A0D9SG79			0	0	0.675	0.852	1.224	0.514	0.805	0.983	0.802	1.597	1.969	1.865	1.586	1.288	1.782	1.642	1.274	1.263	1.813	0.762	1.192	1.456	1.188	2.366
High	Master Protein	Q00577	Transcriptional activator protein Pur-alpha OS=Homo sapiens OX=9606 GN=PURA PE=1 SV=2	0	FALSE	55.357	45	9	21	9	322	34.9	6.44	65.36	9	cell cycle OR cell proliferation;cell organization and biogenesis;DNA metabolism;other metabolic processes;transport;developmental processes;other biological processes	nucleus;other cell component	nucleic acid binding activity;other molecular function	Pf04845	5813	ENSG00000185129	PURA	hsa:5813; Q00577		Exercise-induced circadian regulation	1	0	1.118	0.932	1.114	1.181	1.133	1.037	1.11	1.803	1.811	1.651	1.858	2.25	2.025	2.406	2.129	0.834	0.997	1.056	1.013	0.928	0.993	1.613
High	Master Protein	Q9C0J8	pre-mRNA 3' end processing protein WDR33 OS=Homo sapiens OX=9606 GN=WDR33 PE=1 SV=2	0	FALSE	42.301	14	10	20	10	1336	145.8	9.17	54.63	10	DNA metabolism;RNA metabolism OR transcription;other metabolic processes;stress response;transport;other biological processes	nucleus;other cell component		Pf00400	55339	ENSG00000136709	WDR33	hsa:55339; Q05DP8; Q53FG9; Q587J1; Q69YF7; Q6NUQ0; Q9C0J8; Q9NUL1	mRNA Splicing - Major Pathway; Transport of Mature mRNA Derived from an Intronless Transcript; mRNA 3'-end processing; RNA Polymerase II Transcription Termination; Processing of Intronless Pre-mRNAs		5	0	0.939	0.994	1.005	0.777	0.593	0.717	0.577	0.731	0.497	0.855	0.965	0.821	0.959	0.765	1.007	1.059	1.07	0.827	0.631	0.764	0.614	0.779
High	Master Protein	A0A0A0MTP3	M-phase phosphoprotein 9 OS=Homo sapiens OX=9606 GN=MPHOSPH9 PE=1 SV=1	0.002	FALSE	3.36	1	1	1	1	1153	129.2	6.25	1.83	1						ENSG00000051825	MPHOSPH9	A0A0A0MTP3			0	0
High	Master Protein	Q13185	Chromobox protein homolog 3 OS=Homo sapiens OX=9606 GN=CBX3 PE=1 SV=4	0	FALSE	19.126	44	5	8	4	183	20.8	5.33	21.51	5	cell organization and biogenesis;stress response;other biological processes	other membranes;cytoskeleton;nucleus;other cell component	other molecular function	Pf00385, Pf01393	11335	ENSG00000122565	CBX3	hsa:11335; Q13185; Q96CD7; Q99409; Q9BVS3; Q9P0Z6	RNA Polymerase I Promoter Escape; Transcriptional Regulation by E2F6; ERCC6 (CSB) and EHMT2 (G9a) positively regulate rRNA expression	Exercise-induced circadian regulation; Effect of progerin on genes involved in Hutchinson-Gilford progeria syndrome; NIPBL role in DNA damage - Cornelia de Lange syndrome	6	1	1.137	1.077	1.57	0.821	0.72	0.669	0.601	0.828	0.819	0.837	0.882	0.803	0.926	0.555	0.802	0.947	1.382	0.722	0.633	0.588	0.528	0.729
High	Master Protein	F5H5N1	NADH dehydrogenase [ubiquinone] iron-sulfur protein 7, mitochondrial OS=Homo sapiens OX=9606 GN=NDUFS7 PE=1 SV=1	0	FALSE	13.109	21	4	12	4	182	19.8	9.5	27.94	4	other metabolic processes;transport	other membranes;mitochondrion	transporter activity;other molecular function	Pf01058		ENSG00000115286	NDUFS7	F5H5N1			0	0	1.001	1.088	0.939	1.068	1.202	1.215	1.204	0.867	0.942	0.875	0.95	0.759	0.774	0.834	0.849	1.087	0.938	1.067	1.201	1.213	1.203	0.867
High	Master Protein	A6PW57	Phosphatidylinositol 4-phosphate 5-kinase type-1 alpha OS=Homo sapiens OX=9606 GN=PIP5K1A PE=1 SV=2	0	FALSE	64.142	36	13	35	12	550	61.2	8.34	87.71	13	other metabolic processes	plasma membrane;other membranes;cytosol;nucleus	kinase activity;other molecular function	Pf01504	8394	ENSG00000143398	PIP5K1A	A6PW57		B cell receptor signaling pathway; Regulation of actin cytoskeleton	2	1	1.241	0.998	0.716	1.453	0.659	0.675	0.936	1.524	1.629	1.576	1.553	1.233	1.282	1.325	1.161	0.805	0.577	1.171	0.531	0.544	0.754	1.229
High	Master Protein	E7EUC7	UTP--glucose-1-phosphate uridylyltransferase OS=Homo sapiens OX=9606 GN=UGP2 PE=1 SV=1	0	FALSE	68.108	38	15	37	15	517	57.8	8.13	113.12	15	other metabolic processes	other cell component	other molecular function	Pf01704		ENSG00000169764	UGP2	E7EUC7		Glucuronidation	1	0	1.173	1.005	0.963	0.675	0.865	0.852	0.876	2.114	2.063	1.966	2.163	1.491	1.39	1.322	1.264	0.857	0.822	0.576	0.738	0.727	0.747	1.803
High	Master Protein	H0YMJ0	Mortality factor 4-like protein 1 (Fragment) OS=Homo sapiens OX=9606 GN=MORF4L1 PE=1 SV=1	0	FALSE	23.617	35	6	7	5	245	28.2	9.26	18.89	6	cell organization and biogenesis;other biological processes	nucleus		Pf05712, Pf11717		ENSG00000185787	MORF4L1	H0YMJ0		Pathways affected in adenoid cystic carcinoma	1	0	1.121	1.139	1.275	0.894	0.658	0.764	0.621	1.127	0.959	1.101	1.212	1.223	1.14	0.788	1.027	1.016	1.137	0.797	0.587	0.682	0.554	1.005
High	Master Protein	H0YAJ5	Amyloid-beta A4 precursor protein-binding family B member 2 (Fragment) OS=Homo sapiens OX=9606 GN=APBB2 PE=1 SV=1	0	FALSE	14.076	8	4	4	3	728	80	6.18	10.04	4			other molecular function	Pf00397, Pf00640		ENSG00000163697	APBB2	H0YAJ5			0	0
High	Master Protein	Q96A46	Mitoferrin-2 OS=Homo sapiens OX=9606 GN=SLC25A28 PE=2 SV=1	0	FALSE	4.86	4	1	1	1	364	39.2	8.59	2.63	1	transport;other biological processes	other membranes;mitochondrion	transporter activity	Pf00153	81894	ENSG00000155287	SLC25A28	hsa:81894; Q4VBZ0; Q5T777; Q86VX5; Q969G8; Q96A46; Q9H2J3	Mitochondrial iron-sulfur cluster biogenesis		1	0
High	Master Protein	E5RFF9	DNA replication complex GINS protein SLD5 OS=Homo sapiens OX=9606 GN=GINS4 PE=1 SV=1	0	FALSE	6.901	26	3	3	3	192	22.6	4.89	5.25	3	other metabolic processes	nucleus;other cell component		Pf05916		ENSG00000147536	GINS4	E5RFF9			0	0
High	Master Protein	Q15750	TGF-beta-activated kinase 1 and MAP3K7-binding protein 1 OS=Homo sapiens OX=9606 GN=TAB1 PE=1 SV=1	0	FALSE	35.608	17	7	11	7	504	54.6	5.52	35.01	7	protein metabolism;other metabolic processes;stress response;developmental processes;signal transduction;other biological processes	other membranes;cytosol;nucleus;other cytoplasmic organelle;other cell component	enzyme regulator activity;other molecular function	Pf00481	10454	ENSG00000100324	TAB1	hsa:10454; Q15750; Q2PP09; Q8IZW2	NOD1/2 Signaling Pathway; FCERI mediated NF-kB activation; CLEC7A (Dectin-1) signaling; Ub-specific processing proteases; TRAF6-mediated induction of TAK1 complex within TLR4 complex; IRAK2 mediated activation of TAK1 complex upon TLR7/8 or 9 stimulation; JNK (c-Jun kinases) phosphorylation and activation mediated by activated human TAK1; TAK1 activates NFkB by phosphorylation and activation of I…	Regulation of toll-like receptor signaling pathway; MicroRNAs in cardiomyocyte hypertrophy; IL-1 signaling pathway; RANKL/RANK signaling pathway; TNF-alpha signaling pathway; Interleukin-1 (IL-1) structural pathway; TGF-beta signaling pathway; MAPK signaling pathway; TLR4 signaling and tolerance; miRNAs involvement in the immune response in sepsis; Signal transduction through IL1R; Hepatitis B in…	27	0	1.088	0.987	1.114	1.123	1.109	0.902	1.185	1.89	1.962	1.988	1.729	1.327	1.365	1.42	1.167	0.908	1.024	1.032	1.019	0.829	1.089	1.738
High	Master Protein	J3KSW2	DNA polymerase iota OS=Homo sapiens OX=9606 GN=POLI PE=1 SV=1	0.002	FALSE	3.477	2	1	1	1	637	71.8	6.86	2.11	1	DNA metabolism;other metabolic processes;stress response	nucleus;other cell component	nucleic acid binding activity	Pf00817, Pf11799		ENSG00000101751	POLI	J3KSW2		DNA repair pathways, full network	1	0
High	Master Protein	Q5QPI9	Ectonucleoside triphosphate diphosphohydrolase 6 OS=Homo sapiens OX=9606 GN=ENTPD6 PE=1 SV=2	0	FALSE	6.576	5	2	3	2	437	47.5	8.94	8.42	2		other membranes;ER/Golgi	other molecular function	Pf01150		ENSG00000197586	ENTPD6	Q5QPI9			0	0	0.908	0.954	0.906	1.161	1.219	1.166	1.096	0.467	0.57	0.475	0.603	0.522	0.631	0.486	0.694	1.05	0.998	1.278	1.342	1.284	1.207	0.514
High	Master Protein	E9PPJ1	Kinetochore scaffold 1 OS=Homo sapiens OX=9606 GN=KNL1 PE=1 SV=2	0	FALSE	15.97	4	4	6	4	1746	195.5	5.57	14.18	4	cell cycle OR cell proliferation;other biological processes	nucleus		Pf19221		ENSG00000137812	KNL1	E9PPJ1			0	0	1.791	1.687	0.933	1.554	0.944	1.087	1.588	2.514	2.308	1.502	2.504	2.456	2.435	2.329	1.509	0.942	0.521	0.867	0.527	0.607	0.886	1.403
High	Master Protein	A0A494C0B4	UV excision repair protein RAD23 homolog A OS=Homo sapiens OX=9606 GN=RAD23A PE=1 SV=1	0	FALSE	35.287	36	8	13	6	282	30.5	4.84	36.53	8	protein metabolism;DNA metabolism;other metabolic processes;stress response	nucleus;other cell component	nucleic acid binding activity	Pf00240, Pf00627, Pf09280		ENSG00000179262	RAD23A	A0A494C0B4		Nucleotide excision repair; DNA repair pathways, full network; Nucleotide excision repair in xeroderma pigmentosum	3	0	0.9	0.869	1.022	0.549	1.049	1.05	0.991	0.983	1.088	1.015	1.081	0.956	1.038	0.931	0.943	0.966	1.136	0.61	1.165	1.166	1.101	1.092
High	Master Protein	P57105	Synaptojanin-2-binding protein OS=Homo sapiens OX=9606 GN=SYNJ2BP PE=1 SV=2	0	FALSE	41.909	86	8	27	8	145	15.9	6.3	94.2	8	cell adhesion;cell-cell signaling;other biological processes	plasma membrane;other membranes;mitochondrion;other cell component		Pf00595	55333	ENSG00000213463	SYNJ2BP	hsa:55333; P57105; Q49SH3; Q96IA4			0	0	1.007	1.074	0.896	1.097	1.206	1.183	1.246	0.722	0.773	0.691	0.729	1.06	1.055	1.091	1.198	1.066	0.89	1.09	1.198	1.175	1.238	0.717
High	Master Protein	P45974	Ubiquitin carboxyl-terminal hydrolase 5 OS=Homo sapiens OX=9606 GN=USP5 PE=1 SV=2	0	FALSE	62.897	25	16	31	16	858	95.7	5.03	87.11	16	protein metabolism;other metabolic processes;other biological processes	cytosol;nucleus;other cytoplasmic organelle	other molecular function	Pf00443, Pf00627, Pf02148, Pf17807	8078	ENSG00000111667	USP5	D3DUS7; D3DUS8; hsa:8078; P45974; Q96J22	Synthesis of active ubiquitin: roles of E1 and E2 enzymes; Ub-specific processing proteases	IL-18 signaling pathway	3	0	0.978	0.987	0.983	0.61	1.136	1.133	1.144	1.992	1.766	1.836	1.917	1.244	1.237	1.286	1.156	1.009	1.005	0.624	1.161	1.158	1.17	2.036
High	Master Protein	P04075	Fructose-bisphosphate aldolase A OS=Homo sapiens OX=9606 GN=ALDOA PE=1 SV=2	0	FALSE	148.159	65	21	124	6	364	39.4	8.09	387.81	21	cell organization and biogenesis;other metabolic processes;transport;other biological processes	non-structural extracellular;cytosol;cytoskeleton;other cell component	cytoskeletal activity;other molecular function	Pf00274	226	ENSG00000149925	ALDOA	B4DXI7; hsa:226; P04075; Q6FH76; Q6FI10; Q96B15; Q9BWD9; Q9UCN2	Neutrophil degranulation; Glycolysis; Platelet degranulation ; Gluconeogenesis	VEGFA-VEGFR2 signaling pathway; Clear cell renal cell carcinoma pathways; Aerobic glycolysis; 16p11.2 proximal deletion syndrome; Glycolysis and gluconeogenesis; Sudden infant death syndrome (SIDS) susceptibility pathways	10	13	0.962	0.9	1.068	0.911	0.901	0.974	0.869	0.951	0.888	0.861	0.828	0.805	0.819	0.743	0.731	0.936	1.111	0.947	0.936	1.013	0.903	0.988
High	Master Protein	H3BSB3	M-phase phosphoprotein 6 OS=Homo sapiens OX=9606 GN=MPHOSPH6 PE=1 SV=1	0	FALSE	23.36	47	5	6	5	131	15.5	4.88	19.62	5		cytosol;nucleus		Pf10175		ENSG00000135698	MPHOSPH6	H3BSB3			0	0	1.11	0.991	1.262	0.689	0.606	0.559	0.853	1.722	1.486	1.511	1.764	1.411	1.394	1.442	1.292	0.893	1.137	0.621	0.546	0.504	0.768	1.551
High	Master Protein	O43617	Trafficking protein particle complex subunit 3 OS=Homo sapiens OX=9606 GN=TRAPPC3 PE=1 SV=1	0	FALSE	17.262	23	5	11	5	180	20.3	4.96	26.18	5	cell organization and biogenesis;transport	other membranes;cytosol;ER/Golgi;other cell component		Pf04051	27095	ENSG00000054116	TRAPPC3	A6NDN0; B2RDN2; D3DPS2; hsa:27095; O43617	COPII-mediated vesicle transport; RAB GEFs exchange GTP for GDP on RABs		2	0	1.061	1.07	1.082	0.913	1.143	1.069	1.107	1.044	1.057	0.993	1.174	0.99	1.039	1.198	1.053	1.008	1.02	0.861	1.077	1.007	1.043	0.984
High	Master Protein	A0A2R8YDC7	Mitoguardin 1 OS=Homo sapiens OX=9606 GN=MIGA1 PE=1 SV=1	0	FALSE	12.415	5	2	4	2	585	65.5	5.87	12.02	2	cell organization and biogenesis	other membranes;mitochondrion		Pf10265		ENSG00000180488	MIGA1	A0A2R8YDC7			0	0
High	Master Protein	K7ERP4	Glutathione peroxidase (Fragment) OS=Homo sapiens OX=9606 GN=GPX4 PE=1 SV=1	0	FALSE	30.217	54	8	14	8	155	17.6	7.71	39.29	8	stress response;other biological processes		other molecular function	Pf00255		ENSG00000167468	GPX4	K7ERP4		One-carbon metabolism and related pathways; Ferroptosis; Metapathway biotransformation Phase I and II	3	0	0.971	0.932	0.776	2.159	1.395	1.453	1.454	2.009	2.181	2.085	2.091	2.581	2.778	2.866	2.907	0.96	0.799	2.223	1.436	1.496	1.497	2.068
Medium	Master Protein	Q7Z624	Calmodulin-lysine N-methyltransferase OS=Homo sapiens OX=9606 GN=CAMKMT PE=1 SV=2	0.01	FALSE	2.091	4	1	2	1	323	36.1	6.83	1.83	1	cell organization and biogenesis;protein metabolism;other metabolic processes;other biological processes	cytosol;ER/Golgi;nucleus;other cell component	other molecular function	Pf10294	79823	ENSG00000143919	CAMKMT	hsa:79823; Q4ZG15; Q53SS6; Q7Z624; Q8N6P5; Q9H5G8	Inactivation, recovery and regulation of the phototransduction cascade; Protein methylation		2	0
High	Master Protein	Q9BSJ2	Gamma-tubulin complex component 2 OS=Homo sapiens OX=9606 GN=TUBGCP2 PE=1 SV=2	0	FALSE	94.058	36	26	36	26	902	102.5	6.84	100.5	26	cell cycle OR cell proliferation;cell organization and biogenesis;developmental processes	cytosol;cytoskeleton;nucleus	cytoskeletal activity	Pf04130, Pf17681	10844	ENSG00000130640	TUBGCP2	B4DM18; B7ZKL8; F5H4E0; F5H4L0; hsa:10844; O43632; Q5VWX7; Q9BSJ2	Recruitment of NuMA to mitotic centrosomes; Recruitment of mitotic centrosome proteins and complexes	15q11.2 copy number variation syndrome	3	0	1.091	1.113	1.028	1.08	1.108	1.068	1.071	1.301	1.272	1.35	1.258	1.083	0.984	1.044	0.995	1.021	0.942	0.99	1.016	0.98	0.982	1.193
High	Master Protein	P0DPB6	DNA-directed RNA polymerases I and III subunit RPAC2 OS=Homo sapiens OX=9606 GN=POLR1D PE=1 SV=1	0.001	FALSE	4.354	10	1	2	1	133	15.2	5.8	4.65	1	RNA metabolism OR transcription;other metabolic processes	nucleus	nucleic acid binding activity;other molecular function	Pf13656	51082	ENSG00000186184	POLR1D	hsa:51082; P0DPB6; Q5TBX2; Q96BR3; Q9Y2S0		Pyrimidine metabolism; Eukaryotic transcription initiation; Cytosolic DNA-sensing pathway	3	0
High	Master Protein	Q8NHQ8	Ras association domain-containing protein 8 OS=Homo sapiens OX=9606 GN=RASSF8 PE=1 SV=2	0	FALSE	44.342	29	10	16	10	419	48.3	6.49	41.09	10	signal transduction			Pf00788	11228	ENSG00000123094	RASSF8	A8K1Z0; hsa:11228; O95647; Q5SCI2; Q76KB6; Q8NHQ8			0	0	0.98	1.135	1.401	1.792	1.49	1.415	1.364	0.955	0.845	0.95	0.87	1.019	1.075	1.095	1.019	1.158	1.43	1.828	1.52	1.444	1.392	0.975
High	Master Protein	Q71RC2	La-related protein 4 OS=Homo sapiens OX=9606 GN=LARP4 PE=1 SV=3	0	FALSE	68.837	33	16	33	16	724	80.5	6.61	88.62	16	cell organization and biogenesis;protein metabolism;other metabolic processes;other biological processes	cytosol;other cell component	nucleic acid binding activity	Pf05383	113251	ENSG00000161813	LARP4	A8K6T1; E9PDG5; G3XAA8; G5E976; hsa:113251; Q5CZ97; Q6ZV14; Q71RC2; Q96NF9			0	0	1.149	1.1	0.676	1.1	0.697	0.657	0.776	0.897	0.972	0.975	0.928	0.983	0.953	1.018	0.952	0.958	0.588	0.958	0.607	0.572	0.676	0.781
High	Master Protein	Q86SQ0	Pleckstrin homology-like domain family B member 2 OS=Homo sapiens OX=9606 GN=PHLDB2 PE=1 SV=2	0	FALSE	43.56	13	14	22	14	1253	142.1	7.43	51.93	14	cell organization and biogenesis;other biological processes	plasma membrane;other membranes;cytosol;cytoskeleton;other cell component		Pf00169	90102	ENSG00000144824	PHLDB2	A5PKZ3; hsa:90102; Q59EA8; Q68CY3; Q6NT98; Q86SQ0; Q8N8U8; Q8NAB1; Q8NCU5		Microtubule cytoskeleton regulation	1	0	1.107	1.058	1.258	0.828	0.794	0.653	0.664	2.201	2.641	2.192	2.412	2.165	1.908	2.162	1.623	0.956	1.136	0.748	0.717	0.59	0.6	1.988
High	Master Protein	P31751	RAC-beta serine/threonine-protein kinase OS=Homo sapiens OX=9606 GN=AKT2 PE=1 SV=2	0	FALSE	8.41	12	5	5	3	481	55.7	6.37	4.37	5	cell organization and biogenesis;protein metabolism;other metabolic processes;transport;developmental processes;signal transduction;other biological processes	plasma membrane;other membranes;cytosol;nucleus;other cytoplasmic organelle;other cell component	kinase activity;other molecular function	Pf00069, Pf00169, Pf00433	208	ENSG00000105221	AKT2	B2RBD8; hsa:208; P31751; Q05BV0; Q0VAN0; Q0VAN1; Q68GC0	Regulation of PTEN stability and activity; Deactivation of the beta-catenin transactivating complex; Translocation of SLC2A4 (GLUT4) to the plasma membrane; Constitutive Signaling by AKT1 E17K in Cancer; Regulation of TP53 Degradation; CD28 dependent PI3K/Akt signaling; G beta:gamma signalling through PI3Kgamma; Activation of AKT2; VEGFR2 mediated vascular permeability; RAB GEFs exchange GTP for …	AMP-activated protein kinase (AMPK) signaling; Regulation of toll-like receptor signaling pathway; MicroRNAs in cardiomyocyte hypertrophy; Transcription factors regulate miRNAs related to cardiac hypertrophy; Integrin-mediated cell adhesion; RANKL/RANK signaling pathway; TNF-related weak inducer of apoptosis (TWEAK) signaling pathway; Alzheimer's disease and miRNA effects; Glioblastoma signaling …	76	0	1.384	1.244	1.078	0.971	0.938	0.819	0.973	1.862	1.896	1.955	1.904	1.713	1.658	1.716	1.504	0.899	0.779	0.702	0.678	0.592	0.703	1.346
High	Master Protein	Q9UH17	DNA dC->dU-editing enzyme APOBEC-3B OS=Homo sapiens OX=9606 GN=APOBEC3B PE=1 SV=1	0	FALSE	22.926	15	4	5	4	382	45.9	6.06	19.81	4	DNA metabolism;RNA metabolism OR transcription;other metabolic processes;stress response;other biological processes	nucleus;other cell component	other molecular function	Pf05240, Pf18782	9582	ENSG00000179750	APOBEC3B	B0QYD2; hsa:9582; O95618; Q20WL1; Q5IFJ4; Q7Z2N3; Q7Z6D6; Q9UE74; Q9UH17	Formation of the Editosome		2	0	1.189	1.19	1.277	1.141	1.081	1.051	1.096	1.986	1.781	1.734	1.864	1.724	1.613	1.457	1.426	1	1.074	0.96	0.908	0.884	0.921	1.67
High	Master Protein	Q495B1	Ankyrin repeat and death domain-containing protein 1A OS=Homo sapiens OX=9606 GN=ANKDD1A PE=2 SV=2	0.001	FALSE	3.832	2	1	2	1	522	57.5	6.71	2.13	1	signal transduction			Pf12796, Pf13637	348094	ENSG00000166839	ANKDD1A	hsa:348094; Q495B1; Q495B2; Q495B3; Q8N7A0; Q8NBS5			0	0
High	Master Protein	Q9ULK4	Mediator of RNA polymerase II transcription subunit 23 OS=Homo sapiens OX=9606 GN=MED23 PE=1 SV=2	0	FALSE	28.207	9	10	11	10	1368	156.4	7.4	17.63	10	RNA metabolism OR transcription;other metabolic processes;other biological processes	nucleus;other cell component	other molecular function	Pf11573	9439	ENSG00000112282	MED23	B9TX55; hsa:9439; O95403; Q5JWT3; Q5JWT4; Q6P9H6; Q9H0J2; Q9NTT9; Q9NTU0; Q9ULK4; Q9Y5P7; Q9Y667	Generic Transcription Pathway; PPARA activates gene expression; Transcriptional regulation of white adipocyte differentiation		3	0	0.954	1.068	0.965	0.75	0.826	0.746	0.786	1.09	1.081	1.235	1.063	1.257	1.109	1.137	1.234	1.119	1.012	0.786	0.865	0.782	0.823	1.142
High	Master Protein	Q92538	Golgi-specific brefeldin A-resistance guanine nucleotide exchange factor 1 OS=Homo sapiens OX=9606 GN=GBF1 PE=1 SV=2	0	FALSE	112.898	19	27	47	26	1859	206.3	5.73	133.34	27	cell organization and biogenesis;other metabolic processes;transport;other biological processes	other membranes;cytosol;ER/Golgi;other cell component	enzyme regulator activity;other molecular function	Pf01369, Pf12783	8729	ENSG00000107862	GBF1	hsa:8729; Q149P0; Q149P1; Q5VXX3; Q92538; Q96CK6; Q96HZ3; Q9H473	COPI-dependent Golgi-to-ER retrograde traffic; COPI-mediated anterograde transport; VxPx cargo-targeting to cilium; trans-Golgi Network Vesicle Budding		4	0	1.417	1.368	1.068	1.128	1.136	1.145	1.198	2.277	2.004	2.146	2.133	1.686	1.178	1.625	1.249	0.966	0.754	0.796	0.802	0.808	0.846	1.607
High	Master Protein	Q9UHC6	Contactin-associated protein-like 2 OS=Homo sapiens OX=9606 GN=CNTNAP2 PE=1 SV=1	0	FALSE	14.606	3	2	5	1	1331	148.1	6.58	26.73	2	cell adhesion;cell organization and biogenesis;developmental processes;other biological processes	plasma membrane;other membranes;ER/Golgi;other cytoplasmic organelle;other cell component	other molecular function	Pf00754, Pf02210	26047	ENSG00000174469; ENSG00000278728	CNTNAP2	D3DWG2; hsa:26047; Q14DG2; Q52LV1; Q5H9Q7; Q9UHC6; Q9UQ12			0	0
Medium	Master Protein	K7EKS6	Mediator of RNA polymerase II transcription subunit 16 (Fragment) OS=Homo sapiens OX=9606 GN=MED16 PE=1 SV=1	0.021	FALSE	1.738	3	1	1	1	462	51.4	6.76	0	1		nucleus		Pf11635		ENSG00000175221	MED16	K7EKS6			0	0
High	Master Protein	P04632	Calpain small subunit 1 OS=Homo sapiens OX=9606 GN=CAPNS1 PE=1 SV=1	0	FALSE	52.171	44	7	22	7	268	28.3	5.2	68.39	7	cell organization and biogenesis;protein metabolism;developmental processes;other biological processes	plasma membrane;other membranes;cytosol	other molecular function		826	ENSG00000126247	CAPNS1	A8K0P1; hsa:826; P04632; Q8WTX3; Q96EW0	Formation of the cornified envelope; Degradation of the extracellular matrix; Deregulated CDK5 triggers multiple neurodegenerative pathways in Alzheimer's disease models	Integrin-mediated cell adhesion	4	0	1.048	1.021	0.957	0.501	0.946	1.036	0.926	1.278	1.254	1.266	1.204	0.834	0.948	0.873	0.832	0.974	0.913	0.478	0.903	0.988	0.883	1.22
High	Master Protein	O14686	Histone-lysine N-methyltransferase 2D OS=Homo sapiens OX=9606 GN=KMT2D PE=1 SV=2	0	FALSE	14.28	1	4	4	4	5537	593	5.58	14.21	4	cell organization and biogenesis;protein metabolism;other metabolic processes;other biological processes	nucleus	nucleic acid binding activity;other molecular function	Pf00628, Pf00856, Pf05964, Pf05965, Pf13771, Pf13832	8085	ENSG00000167548	KMT2D	hsa:8085; O14686; O14687	Formation of the beta-catenin:TCF transactivating complex; Deactivation of the beta-catenin transactivating complex; Activation of anterior HOX genes in hindbrain development during early embryogenesis; PKMTs methylate histone lysines; RUNX1 regulates genes involved in megakaryocyte differentiation and platelet function	Histone modifications; 16p11.2 proximal deletion syndrome	7	0	1.111	1.146	1.343	0.698	0.915	1.043	0.725	1.019	1.132	1.205	1.382	1.274	0.929	0.774	1.124	1.032	1.209	0.628	0.824	0.938	0.653	0.917
High	Master Protein	Q96FV9	THO complex subunit 1 OS=Homo sapiens OX=9606 GN=THOC1 PE=1 SV=1	0	FALSE	39.765	24	11	17	11	657	75.6	4.98	45.84	11	DNA metabolism;RNA metabolism OR transcription;other metabolic processes;transport;signal transduction;other biological processes	nucleus;other cell component	nucleic acid binding activity	Pf00531, Pf11957	9984	ENSG00000079134	THOC1	B2RBP6; hsa:9984; Q15219; Q64I72; Q64I73; Q96FV9	Transport of Mature mRNA derived from an Intron-Containing Transcript; mRNA 3'-end processing; RNA Polymerase II Transcription Termination		3	0	1.107	1.132	1.132	1.089	1.001	0.879	0.965	1.492	1.215	1.478	1.387	1.176	1.176	0.96	1.185	1.022	1.023	0.984	0.904	0.794	0.872	1.348
High	Master Protein	F8W8H5	Ras-related protein Rab-24 OS=Homo sapiens OX=9606 GN=RAB24 PE=1 SV=1	0	FALSE	13.449	25	5	7	5	174	19.7	5.43	15.88	5			other molecular function	Pf00071		ENSG00000169228	RAB24	F8W8H5			0	0	0.822	0.983	0.826	1.068	0.891	0.994	0.915	0.938	0.971	1.106	1.221	0.8	0.775	0.843	0.937	1.197	1.005	1.3	1.085	1.21	1.114	1.142
High	Master Protein	P63104	14-3-3 protein zeta/delta OS=Homo sapiens OX=9606 GN=YWHAZ PE=1 SV=1	0	FALSE	114.044	69	15	83	9	245	27.7	4.79	270.76	15	cell organization and biogenesis;protein metabolism;other metabolic processes;stress response;transport;signal transduction;other biological processes	cytosol;mitochondrion;nucleus;other cell component	other molecular function	Pf00244	7534	ENSG00000164924	YWHAZ	A8K1N0; B7Z465; hsa:7534; P29213; P29312; P63104; Q32P43; Q5XJ08; Q6GPI2; Q6IN74; Q6NUR9; Q6P3U9; Q86V33	Deactivation of the beta-catenin transactivating complex; Translocation of SLC2A4 (GLUT4) to the plasma membrane; RHO GTPases activate PKNs; Regulation of localization of FOXO transcription factors; TP53 Regulates Metabolic Genes; Activation of BAD and translocation to mitochondria ; Negative regulation of NOTCH4 signaling; Interleukin-3, Interleukin-5 and GM-CSF signaling; NOTCH4 Activation and …	Cell cycle; Prolactin signaling pathway; Pathogenic Escherichia coli infection; Myometrial relaxation and contraction pathways; Hepatitis B infection; Calcium regulation in cardiac cells; Sudden infant death syndrome (SIDS) susceptibility pathways	20	1	1.011	1.004	1.143	0.618	0.924	0.902	0.898	1.1	1.163	1.15	1.099	0.809	0.836	0.902	0.769	0.993	1.13	0.611	0.914	0.892	0.888	1.087
High	Master Protein	A0A087X2I1	26S proteasome regulatory subunit 10B OS=Homo sapiens OX=9606 GN=PSMC6 PE=1 SV=1	0	FALSE	78.953	38	11	29	11	403	45.8	7.78	91.42	11	protein metabolism;other metabolic processes;stress response;other biological processes	cytosol;nucleus;other cell component	other molecular function	Pf00004, Pf16450, Pf17862	5706	ENSG00000100519	PSMC6	A0A087X2I1; hsa:5706		Proteasome degradation; Alzheimer's disease and miRNA effects; Parkin-ubiquitin proteasomal system pathway; Ciliary landscape; Alzheimer's disease	5	0	1.101	1.058	0.965	0.592	1.019	1.035	1.008	1.945	1.675	1.755	1.842	1.298	1.196	1.299	1.137	0.96	0.876	0.537	0.925	0.939	0.915	1.766
High	Master Protein	E5RGZ2	Homeobox-containing protein 1 OS=Homo sapiens OX=9606 GN=HMBOX1 PE=1 SV=1	0.003	FALSE	2.774	4	1	1	1	386	43.7	6.81	2.66	1	other biological processes	cytosol;cytoskeleton;nucleus	nucleic acid binding activity	Pf00046, Pf04814		ENSG00000147421	HMBOX1	E5RGZ2		miR-222 in exercise-induced cardiac growth	1	0
High	Master Protein	A0A2R8YDP2	Casein kinase II subunit alpha OS=Homo sapiens OX=9606 GN=CSNK2A1 PE=1 SV=1	0	FALSE	42.129	31	7	16	7	354	40.6	8.03	66.39	7	protein metabolism;other metabolic processes		kinase activity;other molecular function	Pf00069		ENSG00000101266	CSNK2A1	A0A2R8YDP2		Alzheimer's disease and miRNA effects; lncRNA in canonical Wnt signaling and colorectal cancer; Breast cancer pathway; Wnt signaling; ncRNAs involved in Wnt signaling in hepatocellular carcinoma; Translation inhibitors in chronically activated PDGFRA cells; Malignant pleural mesothelioma; Alzheimer's disease	8	0	1.034	1.032	1.215	1.058	0.879	0.838	0.911	1.176	1.315	1.036	1.186	1.024	1.005	1.019	0.926	0.998	1.175	1.024	0.85	0.81	0.882	1.137
High	Master Protein	Q9NVV5	Androgen-induced gene 1 protein OS=Homo sapiens OX=9606 GN=AIG1 PE=1 SV=2	0.002	FALSE	3.502	4	1	4	1	245	28.2	8.25	7.17	1	other metabolic processes	other membranes	other molecular function	Pf04750		ENSPPAG00000028952; ENSPTRG00000018666	AIG1	A0A2I3SH05; A0A2J8PSC7; A0A2R9A2I3; A0A6D2X5L0			0	0	0.777	0.924	0.76	0.469	0.679	0.72	0.636	0.199	0.269	0.121	0.221	0.493	0.288	0.356	0.372	1.189	0.978	0.603	0.874	0.927	0.818	0.256
High	Master Protein	Q86XK2	F-box only protein 11 OS=Homo sapiens OX=9606 GN=FBXO11 PE=1 SV=3	0	FALSE	10.674	5	4	5	4	927	103.5	6.99	13.69	4	protein metabolism;other metabolic processes;other biological processes	cytosol;nucleus;other cell component	other molecular function	Pf02207, Pf12937, Pf13229	80204	ENSG00000138081	FBXO11	A1L491; hsa:80204; Q52ZP1; Q53EP7; Q53RT5; Q86XK2; Q8IXG3; Q96E90; Q9H6V8; Q9H9L1; Q9NR14; Q9UFK1; Q9UHI1; Q9UKC2	Antigen processing: Ubiquitination & Proteasome degradation; Neddylation		2	0
High	Master Protein	Q9HA77	Probable cysteine--tRNA ligase, mitochondrial OS=Homo sapiens OX=9606 GN=CARS2 PE=1 SV=1	0	FALSE	17.658	11	5	8	5	564	62.2	8.34	23.79	5	protein metabolism;RNA metabolism OR transcription;other metabolic processes	mitochondrion;other cell component	other molecular function	Pf01406	79587	ENSG00000134905	CARS2	hsa:79587; Q8NI84; Q96IV4; Q9HA77	Mitochondrial tRNA aminoacylation		1	0	0.725	0.876	0.631	1.127	0.726	0.816	0.75	0.595	0.673	0.944	0.755	0.658	0.701	0.635	0.674	1.209	0.871	1.554	1.002	1.125	1.035	0.82
High	Master Protein	Q53T59	HCLS1-binding protein 3 OS=Homo sapiens OX=9606 GN=HS1BP3 PE=1 SV=1	0	FALSE	8.643	7	2	6	2	392	42.8	5.01	16.39	2	other biological processes	mitochondrion;ER/Golgi	other molecular function	Pf00787	64342	ENSG00000118960	HS1BP3	B2RAW2; D6W529; hsa:64342; Q53T59; Q86VC2; Q8N367			0	0
High	Master Protein	H0YGR4	Oligoribonuclease, mitochondrial (Fragment) OS=Homo sapiens OX=9606 GN=REXO2 PE=1 SV=1	0	FALSE	35.198	44	8	18	8	192	22.1	8.24	47.52	8	RNA metabolism OR transcription;other metabolic processes	mitochondrion;nucleus;other cell component	nucleic acid binding activity;other molecular function	Pf00929		ENSG00000076043	REXO2	H0YGR4			0	0	0.935	0.934	0.868	0.98	1.149	1.192	1.308	1.152	1.441	1.165	1.285	1.057	1.356	1.117	1.347	0.999	0.929	1.049	1.229	1.275	1.399	1.233
High	Master Protein	P83436	Conserved oligomeric Golgi complex subunit 7 OS=Homo sapiens OX=9606 GN=COG7 PE=1 SV=1	0	FALSE	17.222	11	6	8	6	770	86.3	5.47	22.75	6	cell organization and biogenesis;protein metabolism;other metabolic processes;transport;other biological processes	other membranes;ER/Golgi;nucleus;other cell component		Pf10191	91949	ENSG00000168434	COG7	hsa:91949; P83436; Q6UWU7	COPI-mediated anterograde transport; Intra-Golgi traffic; Retrograde transport at the Trans-Golgi-Network		3	0	1.122	1.112	1.168	0.776	0.998	1.011	0.942	0.774	0.767	0.938	0.837	0.851	0.595	0.84	0.684	0.991	1.041	0.691	0.889	0.901	0.84	0.69
High	Master Protein	C9JVC9	Voltage-dependent calcium channel subunit alpha-2/delta-2 OS=Homo sapiens OX=9606 GN=CACNA2D2 PE=1 SV=1	0	FALSE	5.625	2	2	2	1	1153	130	5.8	4.69	2	transport;other biological processes	other membranes	transporter activity	Pf00092, Pf08399, Pf08473		ENSG00000007402	CACNA2D2	C9JVC9		MAPK signaling pathway	1	0
High	Master Protein	Q92581	Sodium/hydrogen exchanger 6 OS=Homo sapiens OX=9606 GN=SLC9A6 PE=1 SV=2	0	FALSE	36.578	18	8	23	1	669	74.1	6.48	71.83	8	cell organization and biogenesis;transport;developmental processes;other biological processes	plasma membrane;other membranes;ER/Golgi;other cytoplasmic organelle;other cell component	transporter activity	Pf00999	10479	ENSG00000198689	SLC9A6	A6NIQ9; A8K160; B4DU30; B7ZAE0; hsa:10479; Q3ZCW7; Q5JPP8; Q5JPP9; Q86VS0; Q92581	Sodium/Proton exchangers; Defective SLC9A6 causes X-linked, syndromic mental retardation,, Christianson type (MRXSCH)		2	0
High	Master Protein	Q05639	Elongation factor 1-alpha 2 OS=Homo sapiens OX=9606 GN=EEF1A2 PE=1 SV=1	0	FALSE	123.454	63	21	94	9	463	50.4	9.03	220.53	21	protein metabolism;other metabolic processes;other biological processes	other membranes;other cytoplasmic organelle;other cell component	nucleic acid binding activity;other molecular function	Pf00009, Pf03143, Pf03144	1917	ENSG00000101210	EEF1A2	B5BUF3; E1P5J1; hsa:1917; P54266; Q05639; Q0VGC7	Eukaryotic Translation Elongation	Translation factors	2	0	1.067	1.019	1.012	0.397	0.49	0.439	0.486	0.975	0.961	0.789	0.928	0.864	0.779	0.814	0.759	0.956	0.949	0.372	0.459	0.412	0.455	0.915
High	Master Protein	H3BQZ5	UPF0235 protein C15orf40 OS=Homo sapiens OX=9606 GN=C15orf40 PE=1 SV=1	0.002	FALSE	3.087	19	1	2	1	68	7.5	10.83	2.8	1						ENSG00000169609	C15orf40	H3BQZ5			0	0	0.966	1.073	0.943	0.776	0.771	0.889	0.857	0.853	0.892	0.833	0.794	0.952	1.042	0.874	1.021	1.111	0.976	0.803	0.798	0.92	0.887	0.883
Medium	Master Protein	Q6IC98	GRAM domain-containing protein 4 OS=Homo sapiens OX=9606 GN=GRAMD4 PE=1 SV=1	0.018	FALSE	1.803	2	1	1	1	578	66.4	8.84	2.1	1	other biological processes	other membranes;mitochondrion;ER/Golgi		Pf02893	23151	ENSG00000075240	GRAMD4	A9IN51; A9IN57; hsa:23151; Q68EN0; Q6IC98; Q9UGE6; Q9Y4B9			0	0
High	Master Protein	G5E9M4	Zinc finger protein 277 OS=Homo sapiens OX=9606 GN=ZNF277 PE=1 SV=1	0	FALSE	9.174	6	2	3	1	290	33.8	6.95	8.66	2				Pf12756		ENSG00000198839	ZNF277	G5E9M4			0	0
High	Master Protein	D6RCP8	Lipoyl synthase, mitochondrial OS=Homo sapiens OX=9606 GN=LIAS PE=1 SV=1	0.001	FALSE	4.602	8	1	3	1	242	27.5	9.11	7.78	1	other metabolic processes		other molecular function	Pf04055, Pf16881		ENSG00000121897	LIAS	D6RCP8			0	0	0.958	1.161	0.752	1.488	0.985	1.027	1.165	0.672	0.685	0.656	0.92	0.418	0.505	0.483	0.487	1.212	0.785	1.554	1.029	1.072	1.216	0.702
High	Master Protein	Q12979	Active breakpoint cluster region-related protein OS=Homo sapiens OX=9606 GN=ABR PE=1 SV=2	0	FALSE	68.448	30	19	33	18	859	97.5	6.55	84.24	19	signal transduction;other biological processes	cytosol;other cell component	enzyme regulator activity	Pf00168, Pf00169, Pf00620, Pf00621	29	ENSG00000159842; ENSG00000276016; ENSG00000278741	ABR	B3KW89; B7Z6H7; D3DTH3; D3DTH4; F5H3S2; F5H8B3; hsa:29; Q12979; Q13693; Q13694	RHOA GTPase cycle; CDC42 GTPase cycle; RAC1 GTPase cycle; RAC3 GTPase cycle; NRAGE signals death through JNK; G alpha (12/13) signalling events; RHOC GTPase cycle; RAC2 GTPase cycle; RHOB GTPase cycle		9	1	1.187	1.227	1.181	1.045	1.276	1.216	1.266	2.09	2.032	2.038	2.11	1.648	1.365	1.608	1.361	1.034	0.996	0.881	1.076	1.025	1.067	1.761
Medium	Master Protein	Q9ULZ3	Apoptosis-associated speck-like protein containing a CARD OS=Homo sapiens OX=9606 GN=PYCARD PE=1 SV=2	0.025	FALSE	1.568	4	1	1	1	195	21.6	6.34	1.68	1	cell organization and biogenesis;protein metabolism;other metabolic processes;stress response;transport;signal transduction;other biological processes	non-structural extracellular;other membranes;cytosol;mitochondrion;ER/Golgi;nucleus;other cytoplasmic organelle;other cell component	signal transduction activity or receptor binding;enzyme regulator activity;cytoskeletal activity;other molecular function	Pf00619, Pf02758	29108	ENSG00000103490	PYCARD	hsa:29108; Q96D12; Q9BSZ5; Q9HBD0; Q9NXJ8; Q9ULZ3	Neutrophil degranulation; The AIM2 inflammasome; The NLRP3 inflammasome; Purinergic signaling in leishmaniasis infection; CLEC7A/inflammasome pathway	Nucleotide-binding oligomerization domain (NOD) pathway; Nanomaterial-induced inflammasome activation; TYROBP causal network in microglia; Acute viral myocarditis; Cytosolic DNA-sensing pathway; Activation of NLRP3 inflammasome by SARS-CoV-2; Prostaglandin signaling	12	0
High	Master Protein	Q9P0P8	Mitochondrial transcription rescue factor 1 OS=Homo sapiens OX=9606 GN=MTRES1 PE=1 SV=1	0	FALSE	7.815	9	3	4	3	240	27.9	9.29	5.09	3	protein metabolism;other metabolic processes;other biological processes	mitochondrion	translation activity;nucleic acid binding activity		51250	ENSG00000130349	MTRES1	B3KRG9; hsa:51250; Q9P0P8			0	0	0.971	1.169	1.049	1.203	1.517	1.588	1.428	1.034	1.043	0.973	0.898	1.212	1.23	1.366	1.325	1.204	1.08	1.239	1.563	1.636	1.47	1.065
High	Master Protein	A0A0C4DG51	Calcium-independent phospholipase A2-gamma (Fragment) OS=Homo sapiens OX=9606 GN=PNPLA8 PE=1 SV=1	0	FALSE	8.519	5	3	4	3	639	71.8	8.72	5.24	3	other metabolic processes			Pf01734		ENSG00000135241	PNPLA8	A0A0C4DG51			0	0	1.079	1.062	1.207	0.825	0.975	1.204	1.159	0.513	0.963	0.598	0.553	0.499	0.71	0.378	0.87	0.985	1.119	0.765	0.904	1.116	1.074	0.475
High	Master Protein	A0A1W2PNX8	Protein unc-45 homolog A OS=Homo sapiens OX=9606 GN=UNC45A PE=1 SV=1	0	FALSE	90.778	25	22	45	22	1084	118.3	6.71	119.93	22	developmental processes;other biological processes	cytosol;ER/Golgi;nucleus		Pf11701, Pf13181, Pf13432		ENSG00000140553	UNC45A	A0A1W2PNX8			0	0	1.158	1.071	0.909	0.806	0.805	0.749	0.821	1.17	1.051	1.111	1.147	1.005	0.832	0.979	0.838	0.925	0.785	0.695	0.695	0.647	0.709	1.01
High	Master Protein	Q9H5N1	Rab GTPase-binding effector protein 2 OS=Homo sapiens OX=9606 GN=RABEP2 PE=1 SV=2	0	FALSE	12.102	7	3	3	3	569	63.5	4.78	9.2	3	cell organization and biogenesis;transport;signal transduction;other biological processes	cytosol;cytoskeleton;other cytoplasmic organelle;other cell component	signal transduction activity or receptor binding;enzyme regulator activity	Pf03528, Pf09311	79874	ENSG00000177548	RABEP2	hsa:79874; Q9H5N1		Ciliary landscape; 16p11.2 distal deletion syndrome	2	0
High	Master Protein	Q8N5A5	Zinc finger CCCH-type with G patch domain-containing protein OS=Homo sapiens OX=9606 GN=ZGPAT PE=1 SV=3	0	FALSE	30.88	19	7	9	7	531	57.3	5.43	30.23	7	other biological processes	plasma membrane;other membranes;nucleus;other cell component	nucleic acid binding activity;other molecular function	Pf01585, Pf18044	84619	ENSG00000197114	ZGPAT	E1P5K1; hsa:84619; Q4VXN9; Q5JWI9; Q5JWJ0; Q8N5A5; Q8NC55; Q8WUV4; Q96JI0; Q96JU4; Q9H401			0	0	1.195	1.087	0.903	1.231	0.892	0.816	0.806	0.799	0.836	0.871	0.801	1.246	1.058	1.233	1.02	0.91	0.755	1.03	0.747	0.683	0.675	0.669
High	Master Protein	A0A0D9SGE8	PHD finger protein 6 OS=Homo sapiens OX=9606 GN=PHF6 PE=1 SV=1	0	FALSE	36.256	23	8	23	8	366	41.3	8.68	66.67	8	developmental processes	nucleus	other molecular function	Pf13771		ENSG00000156531	PHF6	A0A0D9SGE8		Mesodermal commitment pathway	1	0	1.005	1.001	1.014	0.999	1.024	1.016	1.095	1.132	1.037	0.967	1.02	1.288	1.149	0.995	1.176	0.996	1.009	0.994	1.018	1.01	1.089	1.126
High	Master Protein	Q5JXI8	Four and a half LIM domains protein 1 (Fragment) OS=Homo sapiens OX=9606 GN=FHL1 PE=1 SV=1	0	FALSE	34.612	32	7	12	7	257	29.1	8.27	33.48	7	developmental processes	plasma membrane;other membranes;cytosol	other molecular function	Pf00412		ENSG00000022267	FHL1	Q5JXI8			0	0	1.047	0.996	1.072	0.938	1.091	1.144	1.085	1.555	1.669	1.391	1.443	1.296	1.224	1.319	1.117	0.951	1.024	0.896	1.042	1.092	1.037	1.485
High	Master Protein	A8MXP9	Matrin-3 OS=Homo sapiens OX=9606 GN=MATR3 PE=1 SV=1	0	FALSE	149.109	44	36	86	36	895	99.9	6.04	238.78	36		nucleus	nucleic acid binding activity;other molecular function			ENSG00000280987	MATR3	A8MXP9			0	0	1.103	1.083	1.154	0.776	0.734	0.753	0.671	1.049	0.88	0.921	1.053	1.118	1.099	0.76	1.065	0.981	1.046	0.703	0.665	0.682	0.608	0.951
High	Master Protein	Q14C86	GTPase-activating protein and VPS9 domain-containing protein 1 OS=Homo sapiens OX=9606 GN=GAPVD1 PE=1 SV=2	0	FALSE	83.531	18	19	29	1	1478	164.9	5.22	86.11	19	cell organization and biogenesis;transport;signal transduction;other biological processes	plasma membrane;other membranes;cytosol;other cytoplasmic organelle	enzyme regulator activity;other molecular function	Pf00616, Pf02204, Pf18151	26130	ENSG00000165219	GAPVD1	A8MYK3; B0QZ62; B0QZ63; B0QZ64; hsa:26130; Q14C76; Q14C86; Q2Q1W1; Q8ND92; Q8WU86; Q96CZ4; Q9NXQ1; Q9P207; Q9Y4N0	RAB GEFs exchange GTP for GDP on RABs; Clathrin-mediated endocytosis		2	10	1.294	1.268	1.102	0.882	1.055	1.092	1.121	3.048	2.566	2.914	2.94	2.43	1.8	2.258	1.782	0.98	0.851	0.681	0.815	0.844	0.866	2.356
High	Master Protein	Q9Y6D5	Brefeldin A-inhibited guanine nucleotide-exchange protein 2 OS=Homo sapiens OX=9606 GN=ARFGEF2 PE=1 SV=3	0	FALSE	95.345	17	24	36	19	1785	201.9	6.33	95.54	24	cell organization and biogenesis;other metabolic processes;transport;signal transduction;other biological processes	other membranes;cytosol;cytoskeleton;ER/Golgi;other cytoplasmic organelle;other cell component	signal transduction activity or receptor binding;enzyme regulator activity;cytoskeletal activity;other molecular function	Pf01369, Pf09324, Pf12783, Pf16213	10564	ENSG00000124198	ARFGEF2	hsa:10564; Q5TFT9; Q9NTS1; Q9Y6D5	Association of TriC/CCT with target proteins during biosynthesis		1	2	1.175	1.194	1.111	1.061	0.944	0.984	1.018	1.846	1.978	1.989	1.857	1.891	1.565	1.849	1.755	1.016	0.946	0.903	0.803	0.838	0.866	1.571
High	Master Protein	Q15434	RNA-binding motif, single-stranded-interacting protein 2 OS=Homo sapiens OX=9606 GN=RBMS2 PE=1 SV=1	0	FALSE	23.932	31	5	9	4	407	43.9	9.07	29.55	5	RNA metabolism OR transcription;other metabolic processes	cytosol;nucleus;other cell component	nucleic acid binding activity	Pf00076	5939	ENSG00000076067	RBMS2	hsa:5939; Q15434			0	0	1.215	1.119	0.895	0.675	0.664	0.739	0.722	2.004	1.868	1.983	2.106	1.356	1.23	1.331	1.145	0.921	0.737	0.555	0.546	0.609	0.594	1.65
High	Master Protein	A0A087X119	Contactin-associated protein-like 3B OS=Homo sapiens OX=9606 GN=CNTNAP3B PE=4 SV=1	0	FALSE	10.11	3	4	5	4	1207	131.8	7.21	11.74	4	cell adhesion	other membranes		Pf00754, Pf02210		ENSG00000154529	CNTNAP3B	A0A087X119			0	0	0.653	0.749	0.847	0.725	1.031	1.092	0.844	0.255	0.135	0.18	0.127	0.228	0.327	0.24	0.386	1.146	1.297	1.11	1.579	1.672	1.292	0.39
High	Master Protein	Q9P0T7	Transmembrane protein 9 OS=Homo sapiens OX=9606 GN=TMEM9 PE=1 SV=1	0	FALSE	11.533	25	4	8	3	183	20.6	6.65	9.62	4	cell organization and biogenesis;transport;other biological processes	non-structural extracellular;other membranes;cytoskeleton;other cytoplasmic organelle;other cell component		Pf05434	252839	ENSG00000116857	TMEM9	B1ALM6; hsa:252839; Q96NQ9; Q9BQF5; Q9P0T7			0	1	0.912	0.883	0.991	0.954	0.82	0.94	0.752	0.409	0.384	0.393	0.403	0.464	0.477	0.46	0.552	0.969	1.088	1.047	0.899	1.031	0.824	0.449
High	Master Protein	A0A2R8YDT1	Glutamine synthetase OS=Homo sapiens OX=9606 GN=GLUL PE=1 SV=1	0	FALSE	14.304	7	3	4	3	507	57.1	8.37	15.12	3	other metabolic processes;stress response;developmental processes;other biological processes	plasma membrane;other membranes;mitochondrion;ER/Golgi;other cell component	other molecular function	Pf00120, Pf03951		ENSG00000135821	GLUL	A0A2R8YDT1		Amino acid metabolism	1	0	1.058	1.017	0.916	0.454	1.034	0.8	1.025	2.042	1.901	2.335	2.135	1.105	0.812	0.912	1.01	0.961	0.865	0.429	0.977	0.756	0.969	1.93
Medium	Master Protein	O75386	Tubby-related protein 3 OS=Homo sapiens OX=9606 GN=TULP3 PE=1 SV=2	0.022	FALSE	1.678	2	1	1	1	442	49.6	7.74	0	1	developmental processes;signal transduction;other biological processes	non-structural extracellular;plasma membrane;other membranes;cytoskeleton;nucleus;other cell component	signal transduction activity or receptor binding;other molecular function	Pf01167, Pf16322	7289	ENSG00000078246	TULP3	B3KNB7; B7Z6A2; D3DUQ4; F8WBZ9; hsa:7289; O75386; Q8N5B0	Hedgehog 'off' state	H19 action Rb-E2F1 signaling and CDK-Beta-catenin activity; Genes related to primary cilium development (based on CRISPR)	3	0
High	Master Protein	E9PSD7	Uracil phosphoribosyltransferase homolog OS=Homo sapiens OX=9606 GN=UPRT PE=1 SV=1	0.001	FALSE	3.657	6	1	1	1	173	19.5	7.81	3	1	other metabolic processes	nucleus;other cell component		Pf14681		ENSG00000094841	UPRT	E9PSD7			0	0
High	Master Protein	P26641	Elongation factor 1-gamma OS=Homo sapiens OX=9606 GN=EEF1G PE=1 SV=3	0	FALSE	114.537	51	20	103	20	437	50.1	6.67	286.49	20	protein metabolism;other metabolic processes;other biological processes	cytosol;other cell component	nucleic acid binding activity	Pf00043, Pf00647, Pf02798	1937	ENSG00000254772	EEF1G	B4DTG2; hsa:1937; P26641; Q6PJ62; Q6PK31; Q96CU2; Q9P196	Signaling by ALK fusions and activated point mutants; Eukaryotic Translation Elongation	Translation factors	3	0	1.172	1.203	1.258	1.203	0.858	0.8	0.862	1.053	0.935	0.933	0.994	1.167	1.062	0.791	1.084	1.026	1.074	1.026	0.732	0.683	0.735	0.898
High	Master Protein	Q9UJX6	Anaphase-promoting complex subunit 2 OS=Homo sapiens OX=9606 GN=ANAPC2 PE=1 SV=1	0.001	FALSE	4.198	4	2	3	2	822	93.8	5.22	5.83	2	cell cycle OR cell proliferation;cell organization and biogenesis;protein metabolism;other metabolic processes;developmental processes;other biological processes	cytosol;nucleus	other molecular function	Pf00888, Pf08672	29882	ENSG00000176248	ANAPC2	hsa:29882; Q5VSG1; Q96DG5; Q96GG4; Q9P2E1; Q9UJX6	Separation of Sister Chromatids; Senescence-Associated Secretory Phenotype (SASP); Antigen processing: Ubiquitination & Proteasome degradation; APC/C:Cdc20 mediated degradation of Securin; APC/C:Cdh1 mediated degradation of Cdc20 and other APC/C:Cdh1 targeted proteins in late mitosis/early G1; Cdc20:Phospho-APC/C mediated degradation of Cyclin A; CDK-mediated phosphorylation and removal of Cdc6; …	Cell cycle; Regulation of sister chromatid separation at the metaphase-anaphase transition	19	0
High	Master Protein	P51970	NADH dehydrogenase [ubiquinone] 1 alpha subcomplex subunit 8 OS=Homo sapiens OX=9606 GN=NDUFA8 PE=1 SV=3	0	FALSE	15.054	24	4	9	4	172	20.1	7.65	14.53	4	cell organization and biogenesis;other metabolic processes;transport	other membranes;mitochondrion	transporter activity;other molecular function	Pf06747	4702	ENSG00000119421	NDUFA8	B1AM93; hsa:4702; P51970; Q9Y6N0	Complex I biogenesis	Electron transport chain: OXPHOS system in mitochondria; Nonalcoholic fatty liver disease; Oxidative phosphorylation	5	0	1.027	1.12	0.914	0.945	1.224	1.323	1.334	0.882	0.84	0.777	0.89	0.61	0.595	0.651	0.677	1.091	0.89	0.92	1.192	1.289	1.299	0.859
High	Master Protein	Q4G0F5	Vacuolar protein sorting-associated protein 26B OS=Homo sapiens OX=9606 GN=VPS26B PE=1 SV=2	0	FALSE	34.028	26	7	18	6	336	39.1	7.36	49.46	7	stress response;transport;other biological processes	other membranes;cytosol;other cytoplasmic organelle;other cell component		Pf03643	112936	ENSG00000151502	VPS26B	hsa:112936; Q4G0F5; Q96A55			0	0	0.96	1.062	0.9	0.971	1.096	0.89	1.006	0.571	0.516	0.411	0.573	0.756	0.786	1.054	0.938	1.106	0.937	1.011	1.141	0.926	1.048	0.594
High	Master Protein	O95980	Reversion-inducing cysteine-rich protein with Kazal motifs OS=Homo sapiens OX=9606 GN=RECK PE=1 SV=1	0.001	FALSE	4.207	4	2	2	2	971	106.4	6.74	5.89	2	cell-cell signaling;cell organization and biogenesis;developmental processes;signal transduction;other biological processes	non-structural extracellular;plasma membrane;other membranes;other cell component	enzyme regulator activity;other molecular function	Pf07648	8434	ENSG00000122707	RECK	B2RNS1; hsa:8434; O95980; Q5W0K6; Q8WX37	Post-translational modification: synthesis of GPI-anchored proteins		1	0
High	Master Protein	Q16777	Histone H2A type 2-C OS=Homo sapiens OX=9606 GN=HIST2H2AC PE=1 SV=4	0	FALSE	21.883	50	4	18	2	129	14	10.9	42.72	4	cell organization and biogenesis	nucleus;other cell component	nucleic acid binding activity;other molecular function	Pf00125, Pf16211	8338	ENSG00000184260	H2AC20	hsa:8338; Q16777; Q6DRA7; Q8IUE5	Formation of the beta-catenin:TCF transactivating complex; Activation of anterior HOX genes in hindbrain development during early embryogenesis; RUNX1 regulates genes involved in megakaryocyte differentiation and platelet function; HCMV Late Events; HCMV Early Events; Transcriptional regulation by small RNAs; Ub-specific processing proteases; RMTs methylate histone arginines; B-WICH complex posit…		41	0	1.504	1.317	1.622	1.135	0.887	0.87	0.794	1.024	0.794	0.908	0.986	1.062	0.758	0.534	0.708	0.876	1.079	0.755	0.59	0.579	0.528	0.681
High	Master Protein	O95772	STARD3 N-terminal-like protein OS=Homo sapiens OX=9606 GN=STARD3NL PE=1 SV=1	0	FALSE	17.84	27	4	7	4	234	26.6	4.81	20.19	4	cell organization and biogenesis;other metabolic processes;transport	other membranes;cytosol;other cytoplasmic organelle;other cell component	other molecular function	Pf10457	83930	ENSG00000010270	STARD3NL	A4D1X0; hsa:83930; O95772	Pregnenolone biosynthesis		1	0	1.042	1.097	0.936	1.187	1.081	1.035	0.92	0.628	0.605	0.61	0.519	0.59	0.573	0.671	0.535	1.053	0.898	1.139	1.037	0.993	0.882	0.603
High	Master Protein	Q9BQ67	Glutamate-rich WD repeat-containing protein 1 OS=Homo sapiens OX=9606 GN=GRWD1 PE=1 SV=1	0	FALSE	44.287	40	9	17	9	446	49.4	4.92	51.83	9	cell organization and biogenesis;other metabolic processes	cytosol;nucleus;other cell component	nucleic acid binding activity;other molecular function	Pf00400, Pf12265	83743	ENSG00000105447	GRWD1	A0MNN5; hsa:83743; Q8TF59; Q9BQ67			0	0	1.097	0.974	1.035	0.765	0.785	0.788	0.963	1.771	1.382	1.284	1.571	1.446	1.281	1.216	1.274	0.888	0.943	0.697	0.716	0.718	0.878	1.614
High	Master Protein	F8WEF5	PHD and RING finger domain-containing protein 1 OS=Homo sapiens OX=9606 GN=PHRF1 PE=1 SV=1	0	FALSE	5.622	2	2	3	2	1647	178.3	8.98	5.39	2			other molecular function	Pf00628, Pf13639	57661	ENSG00000070047	PHRF1	F8WEF5			0	0
High	Master Protein	P11586	C-1-tetrahydrofolate synthase, cytoplasmic OS=Homo sapiens OX=9606 GN=MTHFD1 PE=1 SV=3	0	FALSE	259.673	70	51	160	50	935	101.5	7.3	429.21	51											0	0	1.09	0.971	0.835	0.787	0.812	0.844	0.822	1.545	1.614	1.518	1.491	1.325	1.207	1.27	1.261	0.891	0.766	0.722	0.745	0.775	0.754	1.418
High	Master Protein	Q08AM6	Protein VAC14 homolog OS=Homo sapiens OX=9606 GN=VAC14 PE=1 SV=1	0	FALSE	45.18	17	11	17	11	782	87.9	6.13	42.82	11	other metabolic processes;signal transduction;other biological processes	other membranes;cytosol;ER/Golgi;other cytoplasmic organelle;other cell component	other molecular function	Pf11916, Pf12755	55697	ENSG00000103043	VAC14	B3KPJ5; B3KSM8; hsa:55697; Q08AM6; Q13174; Q6IA12; Q7L4Y1; Q9BW96; Q9H6V6	Synthesis of PIPs at the Golgi membrane; Synthesis of PIPs at the early endosome membrane; Synthesis of PIPs at the late endosome membrane		3	0	1.033	0.976	1.021	0.892	1.089	1.001	1.094	0.882	0.919	0.924	0.949	1.233	0.979	1.215	1.105	0.945	0.988	0.864	1.054	0.969	1.059	0.854
High	Master Protein	J3QQY7	Protein TANC2 (Fragment) OS=Homo sapiens OX=9606 GN=TANC2 PE=1 SV=1	0	FALSE	6.298	23	1	2	1	111	12	5.45	8.32	1						ENSG00000170921	TANC2	J3QQY7			0	0
Medium	Master Protein	F8WBI6	Golgin subfamily A member 8N OS=Homo sapiens OX=9606 GN=GOLGA8N PE=3 SV=1	0.03	FALSE	1.487	1	1	2	1	632	71.5	6.33	4.66	1	cell organization and biogenesis	other membranes;ER/Golgi		Pf15070, Pf19046	643699	ENSG00000232653	GOLGA8N	F8WBI6; hsa:643699			0	0
High	Master Protein	A0A2R8Y589	Centrosomal protein of 78 kDa OS=Homo sapiens OX=9606 GN=CEP78 PE=1 SV=1	0	FALSE	5.505	3	2	3	2	673	74.9	8.5	2.71	2				Pf13516		ENSG00000148019	CEP78	A0A2R8Y589		Ciliopathies	1	0	0.994	0.919	1.043	0.604	0.827	0.822	0.911	1.387	1.369	1.369	1.648	1.36	1.342	1.418	1.297	0.925	1.05	0.608	0.833	0.827	0.917	1.396
High	Master Protein	A0A2R8Y504	Epsilon-sarcoglycan OS=Homo sapiens OX=9606 GN=SGCE PE=1 SV=1	0	FALSE	5.297	8	2	2	2	500	56.7	7.42	5.07	2		plasma membrane;other membranes;cytoskeleton;ER/Golgi		Pf05510		ENSG00000127990	SGCE	A0A2R8Y504			0	0	0.959	0.815	0.916	1.028	0.907	1.124	1.032	0.48	0.688	0.795	0.552	0.537	0.924	0.704	1.071	0.849	0.955	1.072	0.946	1.172	1.076	0.5
High	Master Protein	H0YBV9	Probable C-mannosyltransferase DPY19L4 (Fragment) OS=Homo sapiens OX=9606 GN=DPY19L4 PE=1 SV=1	0.004	FALSE	2.638	5	1	3	1	190	21.7	6.77	6.39	1		other membranes		Pf10034		ENSG00000156162	DPY19L4	H0YBV9			0	0
High	Master Protein	O14879	Interferon-induced protein with tetratricopeptide repeats 3 OS=Homo sapiens OX=9606 GN=IFIT3 PE=1 SV=1	0	FALSE	8.546	6	2	3	2	490	56	5.2	9.39	2	stress response;signal transduction;other biological processes	cytosol;mitochondrion;other cell component	nucleic acid binding activity;other molecular function	Pf13176, Pf13181, Pf13424	3437	ENSG00000119917	IFIT3	hsa:3437; O14879; Q99634; Q9BSK7	Interferon alpha/beta signaling	Immune response to tuberculosis	2	0
High	Master Protein	B0QYK0	RNA-binding protein EWS OS=Homo sapiens OX=9606 GN=EWSR1 PE=1 SV=1	0	FALSE	61.112	17	8	25	3	618	64.9	9.38	78.6	8	other biological processes	nucleus	nucleic acid binding activity;other molecular function	Pf00076, Pf00641		ENSG00000182944	EWSR1	B0QYK0			0	3	1.081	1.421	1.329	1.224	1.239	0.99	1.122	0.645	0.636	1.415	1.235	0.779	0.736	1.674	1.531	1.315	1.23	1.133	1.147	0.916	1.039	0.597
High	Master Protein	C9JRD2	DnaJ homolog subfamily B member 2 (Fragment) OS=Homo sapiens OX=9606 GN=DNAJB2 PE=1 SV=1	0	FALSE	11.827	10	2	5	1	228	25.4	5.73	11.14	2	other biological processes	other membranes;nucleus	other molecular function	Pf00226		ENSG00000135924	DNAJB2	C9JRD2			0	0
High	Master Protein	Q86XN8	RNA-binding protein MEX3D OS=Homo sapiens OX=9606 GN=MEX3D PE=1 SV=3	0.001	FALSE	4.172	3	2	4	1	651	64.8	5.35	2.06	2	other biological processes	nucleus;other cell component	nucleic acid binding activity;other molecular function	Pf00013, Pf13920	399664	ENSG00000181588	MEX3D	A0PJL8; A1L023; E9PAL6; hsa:399664; Q71M49; Q86XN8			0	0
High	Master Protein	O60909	Beta-1,4-galactosyltransferase 2 OS=Homo sapiens OX=9606 GN=B4GALT2 PE=1 SV=1	0.001	FALSE	4.613	6	1	1	1	372	41.9	9.38	3.6	1	protein metabolism;other metabolic processes;developmental processes;other biological processes	other membranes;ER/Golgi;nucleus;other cell component	other molecular function	Pf02709, Pf13733	8704	ENSG00000117411	B4GALT2	B3KTP0; B4DE14; D3DPY6; D3DPY7; hsa:8704; O60511; O60909; Q4V9L9; Q5T4X5; Q5T4Y5; Q9BUP6; Q9NSY7	N-Glycan antennae elongation; Keratan sulfate biosynthesis		2	0
High	Master Protein	D6W5Y5	Cold inducible RNA binding protein, isoform CRA_c OS=Homo sapiens OX=9606 GN=CIRBP PE=1 SV=1	0	FALSE	20.93	21	6	16	1	297	31.9	9.61	38.87	6		nucleus;other cell component	nucleic acid binding activity	Pf00076	1153	ENSG00000099622	CIRBP	D6W5Y5			0	4	1.011	1.032	0.809	0.881	0.857	0.832	0.801	0.844	0.765	0.72	0.835	1.073	0.972	0.964	0.881	1.02	0.8	0.871	0.847	0.822	0.792	0.835
High	Master Protein	A0A0G2JLB3	Glucosylceramidase OS=Homo sapiens OX=9606 GN=GBA PE=1 SV=1	0	FALSE	27.915	17	7	9	7	536	59.6	7.42	26.25	7	other metabolic processes	other membranes;other cytoplasmic organelle	other molecular function	Pf02055, Pf17189		ENSG00000262446	GBA	A0A0G2JLB3			0	0	0.99	0.92	1.168	1.35	1.066	1.079	1.133	0.656	0.701	0.618	0.731	1.135	1.01	1.229	1.121	0.93	1.18	1.364	1.077	1.09	1.144	0.663
High	Master Protein	Q9UNN8	Endothelial protein C receptor OS=Homo sapiens OX=9606 GN=PROCR PE=1 SV=1	0	FALSE	18.775	18	4	5	4	238	26.7	7.18	14.83	4	stress response;other biological processes	non-structural extracellular;plasma membrane;other membranes;cytoskeleton;other cell component	other molecular function	Pf16497	10544	ENSG00000101000	PROCR	B2RC04; hsa:10544; Q14218; Q6IB56; Q96CB3; Q9ULX1; Q9UNN8	Cell surface interactions at the vascular wall; Common Pathway of Fibrin Clot Formation		2	0	0.928	0.973	0.635	0.908	0.719	0.696	0.712	0.777	0.852	0.872	0.761	0.852	0.821	0.717	0.765	1.048	0.684	0.979	0.774	0.75	0.768	0.837
High	Master Protein	F5GZS6	4F2 cell-surface antigen heavy chain OS=Homo sapiens OX=9606 GN=SLC3A2 PE=1 SV=1	0	FALSE	156.598	51	25	79	25	599	64.8	5.1	263.81	25	other metabolic processes;transport	plasma membrane;other membranes;nucleus	other molecular function	Pf00128, Pf16028		ENSG00000168003	SLC3A2	F5GZS6		Ferroptosis; Proximal tubule transport; Malignant pleural mesothelioma	3	0	0.966	0.999	0.978	0.693	0.957	0.966	0.915	0.664	0.701	0.721	0.649	0.866	0.856	0.967	0.768	1.034	1.012	0.718	0.991	1	0.947	0.688
High	Master Protein	A0A590UJQ1	E3 ubiquitin-protein ligase OS=Homo sapiens OX=9606 GN=ITCH PE=1 SV=1	0	FALSE	94.063	32	23	36	21	900	103.1	6.48	106.49	23	protein metabolism;other metabolic processes		other molecular function	Pf00168, Pf00397, Pf00632	83737	ENSG00000078747	ITCH	A0A590UJQ1		TGF-beta signaling pathway; VEGFA-VEGFR2 signaling pathway; EGF/EGFR signaling pathway; Nonalcoholic fatty liver disease; Notch signaling pathway (Netpath)	5	1	0.999	1.021	0.961	1.257	0.955	0.998	1.019	1.352	1.287	1.546	1.301	0.942	1.066	0.978	0.986	1.022	0.962	1.258	0.956	0.999	1.02	1.353
High	Master Protein	I3L2M9	Phosphatidylcholine transfer protein OS=Homo sapiens OX=9606 GN=PCTP PE=1 SV=1	0.005	FALSE	2.515	12	1	1	1	203	23.4	5.3	3.75	1			other molecular function	Pf01852	58488	ENSG00000141179	PCTP	I3L2M9			0	0
High	Master Protein	M0R0V2	Deoxyhypusine synthase (Fragment) OS=Homo sapiens OX=9606 GN=DHPS PE=1 SV=1	0	FALSE	5.818	8	1	3	1	159	17.9	9.83	11.78	1	protein metabolism;other metabolic processes			Pf01916		ENSG00000095059	DHPS	M0R0V2			0	0
High	Master Protein	H3BRD5	Unconventional myosin-IXa OS=Homo sapiens OX=9606 GN=MYO9A PE=1 SV=1	0	FALSE	7.519	2	4	4	4	2396	275.8	8.73	6.87	4	signal transduction;other biological processes	other membranes;cytoskeleton;other cell component	enzyme regulator activity;cytoskeletal activity;other molecular function	Pf00063, Pf00612, Pf00620, Pf00788		ENSG00000066933	MYO9A	H3BRD5			0	0
High	Master Protein	Q8WUA8	Tsukushin OS=Homo sapiens OX=9606 GN=TSKU PE=2 SV=3	0	FALSE	6.547	4	1	1	1	353	37.8	6.87	3.77	1	cell organization and biogenesis;other metabolic processes;stress response;transport;developmental processes;other biological processes	non-structural extracellular	other molecular function	Pf13855	25987	ENSG00000182704	TSKU	B3KQT7; hsa:25987; Q6UXK1; Q8WUA8; Q9UG10; Q9UJX9		Ectoderm differentiation	1	0	1.133	1.029	0.986	1.426	1.54	1.035	1.295	0.705	0.784	0.608	0.641	1.283	1.164	1.169	1.266	0.908	0.87	1.258	1.359	0.913	1.142	0.622
High	Master Protein	M0R122	Epithelial membrane protein 3 OS=Homo sapiens OX=9606 GN=EMP3 PE=1 SV=1	0.001	FALSE	4.251	25	1	1	1	63	7.1	4.72	4.44	1		other membranes		Pf00822		ENSG00000142227	EMP3	M0R122			0	0
High	Master Protein	A0A1B0GWA0	Zinc finger protein 654 OS=Homo sapiens OX=9606 GN=ZNF654 PE=1 SV=1	0.009	FALSE	2.203	1	1	1	1	1128	127.8	5.27	2.75	1				Pf00096		ENSG00000175105	ZNF654	A0A1B0GWA0			0	0
High	Master Protein	Q2Q1W2	E3 ubiquitin-protein ligase TRIM71 OS=Homo sapiens OX=9606 GN=TRIM71 PE=1 SV=1	0.001	FALSE	4.607	3	2	3	2	868	93.3	7.61	7.81	2	cell cycle OR cell proliferation;protein metabolism;RNA metabolism OR transcription;other metabolic processes;developmental processes;signal transduction;other biological processes	other cell component	nucleic acid binding activity;other molecular function	Pf00630, Pf00643, Pf01436	131405	ENSG00000206557	TRIM71	hsa:131405; Q2Q1W2	Antigen processing: Ubiquitination & Proteasome degradation	Mesodermal commitment pathway; let-7 inhibition of ES cell reprogramming	3	0
High	Master Protein	Q9Y259	Choline/ethanolamine kinase OS=Homo sapiens OX=9606 GN=CHKB PE=1 SV=3	0	FALSE	7.242	8	3	5	3	395	45.2	5.49	6.04	3	other metabolic processes	cytosol	kinase activity;other molecular function	Pf01633	1120	ENSG00000100288	CHKB	A0PJM6; hsa:1120; Q13388; Q9Y259	Synthesis of PC; Synthesis of PE	Fatty acid beta-oxidation; Kennedy pathway from sphingolipids; One-carbon metabolism and related pathways; Glycerolipids and glycerophospholipids	6	0
High	Master Protein	P30154	Serine/threonine-protein phosphatase 2A 65 kDa regulatory subunit A beta isoform OS=Homo sapiens OX=9606 GN=PPP2R1B PE=1 SV=3	0	FALSE	74.649	36	14	32	9	601	66.2	4.94	94.87	14	protein metabolism;other metabolic processes;other biological processes	other membranes;other cell component	enzyme regulator activity	Pf02985, Pf13646	5519	ENSG00000137713	PPP2R1B	A8MY67; B0YJ69; B4DGQ6; B4DK91; B4DWW5; F8W8G1; hsa:5519; O75620; P30154; Q8NHV8	Regulation of TP53 Degradation; PI5P, PP2A and IER3 Regulate PI3K/AKT Signaling; DARPP-32 events; Separation of Sister Chromatids; Resolution of Sister Chromatid Cohesion; RHO GTPases Activate Formins; EML4 and NUDC in mitotic spindle formation; Amplification of signal from unattached kinetochores via a MAD2 inhibitory signal; Cyclin D associated events in G1; Disassembly of the destruction compl…	Focal adhesion: PI3K-Akt-mTOR-signaling pathway; Wnt signaling pathway and pluripotency; PI3K-Akt signaling pathway; Netrin-UNC5B signaling pathway; Glycogen synthesis and degradation; Cohesin complex - Cornelia de Lange syndrome	39	0	1.075	1.095	0.95	0.962	0.95	0.977	1.039	1.841	1.643	1.931	1.645	1.488	1.242	1.443	1.236	1.018	0.884	0.894	0.884	0.908	0.966	1.712
High	Master Protein	Q92805	Golgin subfamily A member 1 OS=Homo sapiens OX=9606 GN=GOLGA1 PE=1 SV=3	0	FALSE	69.228	31	16	27	16	767	88.1	5.27	76.5	16		other membranes;cytosol;ER/Golgi;other cell component		Pf01465	2800	ENSG00000136935	GOLGA1	hsa:2800; Q5T164; Q8IYZ9; Q92805	Retrograde transport at the Trans-Golgi-Network		1	0	0.92	1.087	0.963	1.008	1.176	1.045	1.225	0.612	0.614	0.525	0.655	0.828	0.693	0.92	0.836	1.182	1.047	1.095	1.279	1.136	1.332	0.665
High	Master Protein	B8ZZ54	10 kDa heat shock protein, mitochondrial OS=Homo sapiens OX=9606 GN=HSPE1 PE=1 SV=1	0	FALSE	13.559	70	3	10	1	47	5.2	4.72	21.09	3	other biological processes		other molecular function	Pf00166		ENSG00000115541	HSPE1	B8ZZ54			0	0	0.644	0.829	0.687	1.487	1.151	1.268	1.302	0.564	0.809	0.772	0.674	0.673	1.088	0.756	1.016	1.286	1.066	2.309	1.787	1.968	2.022	0.876
High	Master Protein	Q9BYG5	Partitioning defective 6 homolog beta OS=Homo sapiens OX=9606 GN=PARD6B PE=1 SV=1	0	FALSE	22.202	20	6	13	6	372	41.2	5.58	28.12	6	cell cycle OR cell proliferation;cell organization and biogenesis;developmental processes;other biological processes	plasma membrane;other membranes;cytosol;nucleus;other cell component	other molecular function	Pf00564, Pf00595	84612	ENSG00000124171	PARD6B	A2A2A7; hsa:84612; Q9BYG5; Q9Y510	Tight junction interactions; RHOV GTPase cycle	Complement system in neuronal development and plasticity	3	0	0.999	0.883	1.069	0.714	0.78	0.758	0.775	0.578	0.6	0.591	0.558	0.655	0.689	0.753	0.667	0.884	1.071	0.715	0.781	0.759	0.776	0.579
High	Master Protein	X6R9S5	Ubiquitin carboxyl-terminal hydrolase MINDY-3 OS=Homo sapiens OX=9606 GN=MINDY3 PE=1 SV=1	0.002	FALSE	3.53	15	1	2	1	150	17	4.41	6.98	1	protein metabolism;other metabolic processes		other molecular function			ENSG00000148481	MINDY3	X6R9S5			0	0
High	Master Protein	A0A0A0MTL6	Rho family-interacting cell polarization regulator 1 OS=Homo sapiens OX=9606 GN=RIPOR1 PE=1 SV=1	0	FALSE	62.436	19	16	28	16	1238	134	6.43	75.3	16				Pf15903		ENSG00000039523	RIPOR1	A0A0A0MTL6			0	0	1.193	1.077	0.975	0.669	0.897	0.886	0.889	1.549	1.612	1.443	1.528	1.235	1.135	1.163	1.127	0.903	0.817	0.56	0.752	0.743	0.745	1.298
Medium	Master Protein	Q8TEL6	Short transient receptor potential channel 4-associated protein OS=Homo sapiens OX=9606 GN=TRPC4AP PE=1 SV=2	0.019	FALSE	1.763	1	1	1	1	797	90.8	7.61	2.13	1	protein metabolism;other metabolic processes;transport;developmental processes	plasma membrane;other membranes;other cell component	other molecular function	Pf12463	26133	ENSG00000100991	TRPC4AP	E1P5Q0; E1P5Q1; hsa:26133; Q8TEL6; Q96H82; Q9BVB8; Q9H429; Q9UFS6	TRP channels	IL-18 signaling pathway	2	0
High	Master Protein	P27540	Aryl hydrocarbon receptor nuclear translocator OS=Homo sapiens OX=9606 GN=ARNT PE=1 SV=1	0.001	FALSE	4.449	3	2	2	2	789	86.6	6.54	5.66	2	other metabolic processes;stress response;developmental processes;signal transduction;other biological processes	nucleus;other cell component	signal transduction activity or receptor binding;nucleic acid binding activity;other molecular function	Pf00010, Pf00989, Pf14598	405	ENSG00000143437	ARNT	B2R9H1; C4AMA1; F8WAP6; hsa:405; P27540; Q59ED4; Q5QP39; Q8NDC7	PPARA activates gene expression; Endogenous sterols; Xenobiotics; Aryl hydrocarbon receptor signalling; Regulation of gene expression by Hypoxia-inducible Factor	Angiogenesis; Aryl hydrocarbon receptor Netpath; Aryl hydrocarbon receptor pathway; Nuclear receptors meta-pathway; Photodynamic therapy-induced HIF-1 survival signaling; VEGFA-VEGFR2 signaling pathway; Clear cell renal cell carcinoma pathways; Type 2 papillary renal cell carcinoma	14	0
High	Master Protein	H0Y4E8	Serine/threonine-protein kinase SIK3 (Fragment) OS=Homo sapiens OX=9606 GN=SIK3 PE=1 SV=1	0	FALSE	10.926	2	2	4	2	1363	150	6.98	13.38	2	protein metabolism;other metabolic processes	nucleus	kinase activity;other molecular function	Pf00069		ENSG00000160584	SIK3	H0Y4E8			0	0
High	Master Protein	Q5T280	Putative methyltransferase C9orf114 OS=Homo sapiens OX=9606 GN=SPOUT1 PE=1 SV=3	0	FALSE	17.836	18	6	7	6	376	42	7.43	16.31	6	cell cycle OR cell proliferation;RNA metabolism OR transcription;other metabolic processes;other biological processes	cytoskeleton;other cell component	nucleic acid binding activity;other molecular function	Pf02598	51490	ENSG00000198917	SPOUT1	hsa:51490; Q0D2P6; Q5T280; Q6P469; Q6PGP9; Q6PIJ1; Q6PJV9			0	0	1.082	0.995	0.91	0.585	0.699	0.808	0.825	0.796	0.594	0.604	0.899	1.583	1.411	1.293	1.295	0.92	0.841	0.541	0.646	0.747	0.763	0.736
High	Master Protein	Q96BX8	MOB kinase activator 3A OS=Homo sapiens OX=9606 GN=MOB3A PE=1 SV=1	0	FALSE	10.63	29	3	5	3	217	25.4	8.63	16.24	3			other molecular function	Pf03637	126308	ENSG00000172081	MOB3A	B3KTF1; hsa:126308; O75249; Q8TF69; Q96BX8			0	0	1.196	1.208	0.973	0.948	0.731	0.969	0.753	0.998	0.87	1.143	0.987	1.421	0.849	1.033	1.174	1.01	0.814	0.793	0.611	0.81	0.629	0.834
High	Master Protein	P53597	Succinate--CoA ligase [ADP/GDP-forming] subunit alpha, mitochondrial OS=Homo sapiens OX=9606 GN=SUCLG1 PE=1 SV=4	0	FALSE	21.053	14	4	10	4	346	36.2	8.79	27.39	4	other metabolic processes	mitochondrion;other cell component	other molecular function	Pf00549, Pf02629	8802	ENSG00000163541	SUCLG1	hsa:8802; P53597; Q9BWB0; Q9UNP6	Citric acid cycle (TCA cycle)	Amino acid metabolism; TCA cycle (aka Krebs or citric acid cycle)	3	0	0.733	0.906	0.735	1.247	1.212	1.297	1.391	0.611	0.804	0.65	0.7	0.62	0.745	0.623	0.782	1.235	1.002	1.701	1.654	1.769	1.897	0.833
High	Master Protein	O75381	Peroxisomal membrane protein PEX14 OS=Homo sapiens OX=9606 GN=PEX14 PE=1 SV=1	0	FALSE	74.498	49	14	24	14	377	41.2	4.94	70.97	14	cell organization and biogenesis;protein metabolism;other metabolic processes;transport;other biological processes	other membranes;cytosol;nucleus;other cytoplasmic organelle;other cell component	signal transduction activity or receptor binding;cytoskeletal activity;other molecular function	Pf04695	5195	ENSG00000142655	PEX14	B2R7N1; B3KML6; B7Z1N2; hsa:5195; O75381; Q8WX51	E3 ubiquitin ligases ubiquitinate target proteins; Peroxisomal protein import; Class I peroxisomal membrane protein import		3	0	0.986	0.93	0.909	0.691	0.739	0.701	0.649	0.429	0.456	0.494	0.459	0.661	0.656	0.75	0.704	0.943	0.922	0.7	0.749	0.711	0.658	0.435
High	Master Protein	D6RAN8	39S ribosomal protein L27, mitochondrial OS=Homo sapiens OX=9606 GN=MRPL27 PE=1 SV=1	0	FALSE	19.887	51	4	13	4	93	10.5	9.54	27.46	4	protein metabolism;other metabolic processes	translational apparatus	other molecular function	Pf01016		ENSG00000108826	MRPL27	D6RAN8			0	0	0.8	1.016	0.685	1.249	1.271	1.44	1.371	0.705	0.84	0.753	0.748	0.823	0.94	0.861	0.918	1.27	0.856	1.56	1.588	1.8	1.714	0.881
High	Master Protein	P46977	Dolichyl-diphosphooligosaccharide--protein glycosyltransferase subunit STT3A OS=Homo sapiens OX=9606 GN=STT3A PE=1 SV=2	0	FALSE	73.054	24	17	61	15	705	80.5	8.07	163.9	17	protein metabolism;other metabolic processes;other biological processes	other membranes;ER/Golgi	other molecular function	Pf02516	3703	ENSG00000134910	STT3A	B4DJ24; E9PNQ1; hsa:3703; P46977; Q86XU9; Q8TE35; Q8WUB4	Asparagine N-linked glycosylation; Maturation of spike protein		2	0	0.977	0.921	1.048	0.928	0.923	0.9	0.923	0.619	0.595	0.638	0.648	0.833	0.861	0.891	0.934	0.943	1.073	0.95	0.946	0.922	0.945	0.634
High	Master Protein	P10644	cAMP-dependent protein kinase type I-alpha regulatory subunit OS=Homo sapiens OX=9606 GN=PRKAR1A PE=1 SV=1	0	FALSE	51.524	29	9	19	9	381	43	5.35	59.21	9	cell-cell signaling;cell cycle OR cell proliferation;cell organization and biogenesis;stress response;developmental processes;signal transduction;other biological processes	plasma membrane;other membranes;cytosol;cytoskeleton;other cytoplasmic organelle;other cell component	enzyme regulator activity;other molecular function	Pf00027, Pf02197	5573	ENSG00000108946	PRKAR1A	hsa:5573; K7ER48; P10644; Q567S7	ALK mutants bind TKIs; Signaling by ALK fusions and activated point mutants; Hedgehog 'off' state; FCGR3A-mediated IL10 synthesis; ADORA2B mediated anti-inflammatory cytokines production; Factors involved in megakaryocyte development and platelet production; Glucagon-like Peptide-1 (GLP1) regulates insulin secretion; Vasopressin regulates renal water homeostasis via Aquaporins; PKA activation; PK…	Mesodermal commitment pathway; Myometrial relaxation and contraction pathways; Mesodermal commitment pathway; G protein signaling pathways; Cannabinoid receptor signaling; Lipid metabolism pathway; Hippo signaling regulation pathways; Hippo-Merlin signaling dysregulation; Fragile X syndrome; Calcium regulation in cardiac cells; Sudden infant death syndrome (SIDS) susceptibility pathways	23	0	0.976	0.97	1.037	0.9	0.975	0.916	0.926	0.924	0.985	0.928	0.929	1.246	1.281	1.314	1.169	0.995	1.063	0.922	0.999	0.939	0.949	0.947
High	Master Protein	Q9Y4G6	Talin-2 OS=Homo sapiens OX=9606 GN=TLN2 PE=1 SV=4	0	FALSE	169.225	20	38	83	24	2542	271.4	5.57	217.32	38	cell adhesion;cell organization and biogenesis	plasma membrane;other membranes;cytoskeleton;other cell component	signal transduction activity or receptor binding;cytoskeletal activity;other molecular function	Pf00373, Pf01608, Pf08913, Pf09141, Pf16511	83660	ENSG00000171914	TLN2	A6NLB8; hsa:83660; Q9Y4G6		Focal adhesion	1	1	1.045	1.024	0.921	1.152	1.028	0.96	1.024	0.963	0.924	0.973	0.905	0.871	0.842	0.973	0.826	0.981	0.882	1.103	0.984	0.919	0.98	0.922
High	Master Protein	Q8TDW4	Suppressor of tumorigenicity 7 protein-like OS=Homo sapiens OX=9606 GN=ST7L PE=2 SV=1	0	FALSE	11.704	8	4	6	1	575	64.7	7.53	11.52	4	other biological processes	other membranes		Pf04184	54879	ENSG00000007341	ST7L	A8K4S7; hsa:54879; Q49AH6; Q5TEI4; Q5U5K6; Q6N067; Q7Z2Z0; Q7Z3C2; Q8N7P8; Q8TDW1; Q8TDW2; Q8TDW3; Q8TDW4; Q9NXF3			0	0
High	Master Protein	O15498	Synaptobrevin homolog YKT6 OS=Homo sapiens OX=9606 GN=YKT6 PE=1 SV=1	0	FALSE	39.205	55	10	20	10	198	22.4	6.92	54.46	10	cell organization and biogenesis;transport	plasma membrane;other membranes;cytosol;mitochondrion;ER/Golgi;other cytoplasmic organelle;other cell component	other molecular function	Pf00957, Pf13774	10652	ENSG00000106636	YKT6	B4DR94; hsa:10652; O15498; Q53F01; Q6FGU9; Q6IB15	RHOA GTPase cycle; CDC42 GTPase cycle; RAC1 GTPase cycle; RHOG GTPase cycle; COPI-mediated anterograde transport; RAC3 GTPase cycle; Intra-Golgi traffic; COPII-mediated vesicle transport		8	0	1.412	1.288	1.07	1.296	0.997	0.993	1.139	2.305	2.373	2.391	2.204	1.682	1.3	1.576	1.425	0.912	0.757	0.918	0.706	0.703	0.807	1.632
High	Master Protein	A0A087WZT0	Protein Smaug homolog 2 OS=Homo sapiens OX=9606 GN=SAMD4B PE=1 SV=1	0	FALSE	8.566	6	2	4	2	663	72.4	7.31	12.06	2	other biological processes	cytosol	nucleic acid binding activity;other molecular function	Pf00536		ENSG00000179134	SAMD4B	A0A087WZT0			0	0	1.376	1.333	0.887	0.893	1.461	0.846	1.102	1.224	1.522	1.771	1.555	1.508	1.726	1.831	1.398	0.968	0.644	0.649	1.061	0.615	0.801	0.889
High	Master Protein	Q8WVK2	U4/U6.U5 small nuclear ribonucleoprotein 27 kDa protein OS=Homo sapiens OX=9606 GN=SNRNP27 PE=1 SV=1	0.001	FALSE	3.789	6	1	3	1	155	18.8	11.62	9.39	1	RNA metabolism OR transcription;other metabolic processes	nucleus	nucleic acid binding activity	Pf08648	11017	ENSG00000124380	SNRNP27	hsa:11017; Q15410; Q8WVK2	mRNA Splicing - Major Pathway		1	0	1.064	0.958	0.831	0.643	0.576	0.888	0.504	0.597	0.435	0.983	0.879	0.598	0.536	0.774	0.668	0.901	0.781	0.604	0.542	0.834	0.473	0.561
Medium	Master Protein	B4DGE2	A-kinase-interacting protein 1 OS=Homo sapiens OX=9606 GN=AKIP1 PE=1 SV=1	0.016	FALSE	1.852	4	1	1	1	195	21.7	8.19	2.48	1	other biological processes	nucleus				ENSG00000166452	AKIP1	B4DGE2			0	0
High	Master Protein	A0A494C182	Breast cancer type 1 susceptibility protein (Fragment) OS=Homo sapiens OX=9606 GN=BRCA1 PE=1 SV=1	0	FALSE	7.258	5	2	4	2	601	67.5	6.77	6.77	2	DNA metabolism;other metabolic processes;stress response			Pf12820		ENSG00000012048	BRCA1	A0A494C182		miRNA regulation of DNA damage response; Glioblastoma signaling pathways; Hepatitis C and hepatocellular carcinoma; Pathways affected in adenoid cystic carcinoma; PI3K-Akt signaling pathway; Breast cancer pathway; DNA repair pathways, full network; Nucleotide excision repair in xeroderma pigmentosum ; SMC1/SMC3 role in DNA damage - Cornelia de Lange Syndrome; DNA damage response	10	0
High	Master Protein	A0A590PXD8	Cordon-bleu protein-like 1 OS=Homo sapiens OX=9606 GN=COBLL1 PE=1 SV=1	0	FALSE	17.109	6	4	6	4	1204	131.7	6.67	14.98	4											0	0	1.257	1.186	1.149	1.824	0.903	1.098	0.963	2.242	2.556	2.13	2.304	1.717	1.777	1.914	1.746	0.943	0.914	1.451	0.718	0.874	0.766	1.784
High	Master Protein	Q9H173	Nucleotide exchange factor SIL1 OS=Homo sapiens OX=9606 GN=SIL1 PE=1 SV=1	0	FALSE	28.5	25	7	12	7	461	52.1	5.36	29.86	7	transport;other biological processes	ER/Golgi	other molecular function		64374	ENSG00000120725	SIL1	D3DQC2; hsa:64374; Q8N2L3; Q9H173			0	0	0.901	0.907	0.913	1.149	1.173	1.287	1.217	0.577	0.699	0.628	0.641	0.577	0.774	0.649	0.802	1.007	1.013	1.276	1.303	1.429	1.351	0.64
High	Master Protein	Q6JQN1	Acyl-CoA dehydrogenase family member 10 OS=Homo sapiens OX=9606 GN=ACAD10 PE=1 SV=1	0	FALSE	20.108	8	7	13	7	1059	118.8	8.06	29.23	7	other metabolic processes	mitochondrion	other molecular function	Pf00441, Pf01636, Pf02770, Pf02771, Pf13419	80724	ENSG00000111271	ACAD10	G3XAJ0; hsa:80724; Q6JQN1; Q8N828; Q8NAP2; Q96BX5	Mitochondrial Fatty Acid Beta-Oxidation		1	0	0.718	0.906	0.877	0.988	1.262	1.539	1.135	0.914	0.985	0.906	0.835	0.963	1.214	0.725	1.019	1.262	1.221	1.376	1.758	2.143	1.582	1.273
High	Master Protein	H0YKR4	Ceramide synthase 4 (Fragment) OS=Homo sapiens OX=9606 GN=CERS4 PE=1 SV=1	0	FALSE	6.283	16	1	1	1	136	16.2	10.23	4.81	1		nucleus	nucleic acid binding activity	Pf00046		ENSG00000090661	CERS4	H0YKR4		Sphingolipid metabolism overview; Sphingolipid metabolism: integrated pathway; Sphingolipid metabolism in senescence	3	0
High	Master Protein	Q08623	Pseudouridine-5'-phosphatase OS=Homo sapiens OX=9606 GN=PUDP PE=1 SV=3	0	FALSE	5.586	11	2	2	2	228	25.2	5.31	4.68	2	other metabolic processes	cytosol	other molecular function	Pf13419	8226	ENSG00000130021	PUDP	B2R7X6; B4DV93; B7Z6Q3; E9PAV8; F5GWZ2; hsa:8226; Q08623; Q53F84; Q96EB8	Pyrimidine salvage		1	0	0.984	1.049	1.021	0.86	1.183	1.239	1.002	1.535	1.538	1.683	1.65	1.177	1.338	1.175	1.215	1.066	1.038	0.874	1.202	1.259	1.018	1.561
High	Master Protein	D6RCC9	Glutathione S-transferase C-terminal domain-containing protein (Fragment) OS=Homo sapiens OX=9606 GN=GSTCD PE=1 SV=1	0.001	FALSE	4.136	17	2	2	2	167	19.1	5.62	5.19	2						ENSG00000138780	GSTCD	D6RCC9		Metapathway biotransformation Phase I and II	1	0	1.151	1.239	0.968	0.598	1.164	1.441	1.356	2.998	2.606	2.343	2.622	1.594	1.664	1.785	1.376	1.076	0.841	0.519	1.011	1.251	1.178	2.604
High	Master Protein	Q9UBS4	DnaJ homolog subfamily B member 11 OS=Homo sapiens OX=9606 GN=DNAJB11 PE=1 SV=1	0	FALSE	84.71	56	15	55	15	358	40.5	6.18	160.41	15	protein metabolism;other metabolic processes;stress response;signal transduction;other biological processes	ER/Golgi;other cell component	other molecular function	Pf00226, Pf01556	51726	ENSG00000090520	DNAJB11	hsa:51726; Q542Y5; Q542Y9; Q6IAQ8; Q96JC6; Q9UBS4	XBP1(S) activates chaperone genes	Photodynamic therapy-induced unfolded protein response	2	0	0.966	0.921	1.03	0.986	0.917	0.906	0.899	0.523	0.543	0.509	0.523	0.741	0.8	0.819	0.845	0.953	1.066	1.021	0.95	0.938	0.931	0.541
High	Master Protein	Q6PIJ6	F-box only protein 38 OS=Homo sapiens OX=9606 GN=FBXO38 PE=1 SV=3	0	FALSE	7.418	5	4	4	4	1188	133.9	6.33	8.06	4	protein metabolism;other metabolic processes;other biological processes	cytosol;nucleus;other cell component		Pf00646	81545	ENSG00000145868	FBXO38	hsa:81545; Q6PIJ6; Q6PK72; Q7Z2U0; Q86VN3; Q9BXY6; Q9H837; Q9HC40			0	0
High	Master Protein	B5MBX0	Sororin OS=Homo sapiens OX=9606 GN=CDCA5 PE=1 SV=1	0	FALSE	13.221	12	2	4	2	307	33.7	9.64	20.05	2	cell cycle OR cell proliferation;cell organization and biogenesis;other biological processes	nucleus;other cell component		Pf09666		ENSG00000146670	CDCA5	B5MBX0			0	0
High	Master Protein	P61026	Ras-related protein Rab-10 OS=Homo sapiens OX=9606 GN=RAB10 PE=1 SV=1	0	FALSE	62.987	54	10	41	7	200	22.5	8.38	113.31	10	cell cycle OR cell proliferation;cell organization and biogenesis;transport;developmental processes;other biological processes	plasma membrane;other membranes;cytosol;cytoskeleton;ER/Golgi;other cytoplasmic organelle;other cell component	cytoskeletal activity;other molecular function	Pf00071	10890	ENSG00000084733	RAB10	D6W538; hsa:10890; O88386; P61026; Q6IA52; Q9D7X6; Q9H0T3	Neutrophil degranulation; Translocation of SLC2A4 (GLUT4) to the plasma membrane; RAB GEFs exchange GTP for GDP on RABs; RAB geranylgeranylation	Focal adhesion: PI3K-Akt-mTOR-signaling pathway	5	0	0.916	1.027	1.078	0.991	1.127	1.067	1.091	0.581	0.574	0.617	0.545	0.823	0.837	0.92	0.915	1.122	1.177	1.082	1.231	1.165	1.191	0.634
High	Master Protein	Q8TED0	U3 small nucleolar RNA-associated protein 15 homolog OS=Homo sapiens OX=9606 GN=UTP15 PE=1 SV=3	0	FALSE	30.619	16	8	17	8	518	58.4	9.11	43.77	8	RNA metabolism OR transcription;other metabolic processes;other biological processes	ER/Golgi;nucleus;other cell component		Pf00400, Pf09384	84135	ENSG00000164338	UTP15	B4DU75; B4DXK8; hsa:84135; Q6IA60; Q8TED0; Q96E08; Q9H9F8	Major pathway of rRNA processing in the nucleolus and cytosol; rRNA modification in the nucleus and cytosol		2	0	1.237	1.02	1.28	0.637	0.844	0.64	0.783	1.658	1.305	1.415	1.515	1.797	1.829	1.434	1.759	0.825	1.035	0.515	0.682	0.517	0.633	1.34
High	Master Protein	F8VVD5	2-methoxy-6-polyprenyl-1,4-benzoquinol methylase, mitochondrial (Fragment) OS=Homo sapiens OX=9606 GN=COQ5 PE=1 SV=1	0	FALSE	6.904	25	2	3	1	91	9.9	7.39	6.96	2	other metabolic processes		other molecular function	Pf01209		ENSG00000110871	COQ5	F8VVD5			0	0
High	Master Protein	G3V2C6	Integrin alpha-7 (Fragment) OS=Homo sapiens OX=9606 GN=ITGA7 PE=1 SV=1	0	FALSE	4.792	12	1	2	1	153	16.6	5.29	6.08	1	cell adhesion;signal transduction	plasma membrane;other membranes				ENSG00000135424	ITGA7	G3V2C6		Focal adhesion: PI3K-Akt-mTOR-signaling pathway; PI3K-Akt signaling pathway	2	0
High	Master Protein	Q7L5N7	Lysophosphatidylcholine acyltransferase 2 OS=Homo sapiens OX=9606 GN=LPCAT2 PE=1 SV=1	0.001	FALSE	3.685	2	1	2	1	544	60.2	6.55	5.32	1	cell organization and biogenesis;other metabolic processes	plasma membrane;other membranes;ER/Golgi;other cell component	other molecular function	Pf00036, Pf01553, Pf13202	54947	ENSG00000087253	LPCAT2	A3KBM1; hsa:54947; Q6MZJ6; Q7L5N7; Q9NX23	Acyl chain remodelling of PC		1	0	1.006	0.988	1.073	0.4	0.476	0.485	0.286	0.25	0.414	0.234	0.188	0.267	0.239	0.235	0.272	0.982	1.066	0.398	0.473	0.482	0.284	0.248
High	Master Protein	G3V5T0	Maleylacetoacetate isomerase OS=Homo sapiens OX=9606 GN=GSTZ1 PE=1 SV=1	0	FALSE	5.656	14	2	3	2	202	22.6	7.69	6.01	2	other metabolic processes	other cell component	other molecular function	Pf13409, Pf14497		ENSG00000100577	GSTZ1	G3V5T0		Metapathway biotransformation Phase I and II	1	0	0.999	1.064	1.033	1.165	1.462	1.662	1.426	0.8	1.07	1.072	1.021	1.011	1.312	1.308	1.168	1.066	1.035	1.166	1.464	1.664	1.428	0.801
High	Master Protein	P61758	Prefoldin subunit 3 OS=Homo sapiens OX=9606 GN=VBP1 PE=1 SV=4	0	FALSE	48.302	49	10	36	10	197	22.6	7.11	83.63	10	cell organization and biogenesis;other biological processes	cytosol;nucleus;other cell component	cytoskeletal activity;other molecular function	Pf02996	7411	ENSG00000155959	VBP1	B2R8L5; B4DWR3; F5H2A7; hsa:7411; O55228; P61758; Q15765; Q5JT81; Q86X96	Prefoldin mediated transfer of substrate to CCT/TriC	Cellular proteostasis	2	0	1.099	0.965	0.995	0.716	1.125	1.059	1.125	1.591	1.514	1.503	1.546	1.048	1.058	1.098	1.038	0.878	0.905	0.651	1.024	0.964	1.024	1.448
High	Master Protein	P62633	Cellular nucleic acid-binding protein OS=Homo sapiens OX=9606 GN=CNBP PE=1 SV=1	0	FALSE	42.714	58	10	28	10	177	19.5	7.71	75.93	10	DNA metabolism;other metabolic processes;other biological processes	cytosol;ER/Golgi;nucleus;other cell component	nucleic acid binding activity;other molecular function	Pf00098	7555	ENSG00000169714	CNBP	A8K7V4; B2RAV9; B4DP17; D3DNB9; D3DNC0; D3DNC1; E9PDR7; hsa:7555; P20694; P62633; Q4JGY0; Q4JGY1; Q5QJR0; Q5U0E9; Q6PJI7; Q96NV3			0	0	1.02	0.933	0.688	1.035	0.821	0.798	0.909	0.805	0.805	0.417	0.769	1.122	0.954	1.066	0.977	0.915	0.674	1.015	0.805	0.782	0.891	0.789
High	Master Protein	F5H5T5	Ubiquitin-protein ligase E3B (Fragment) OS=Homo sapiens OX=9606 GN=UBE3B PE=1 SV=8	0	FALSE	5.738	3	1	1	1	871	100.4	7.85	3.29	1	protein metabolism;other metabolic processes		other molecular function	Pf00612, Pf00632		ENSG00000151148	UBE3B	F5H5T5			0	0
High	Master Protein	Q07889	Son of sevenless homolog 1 OS=Homo sapiens OX=9606 GN=SOS1 PE=1 SV=1	0	FALSE	8.69	4	5	5	5	1333	152.4	6.84	7.43	5	cell organization and biogenesis;developmental processes;signal transduction;other biological processes	plasma membrane;other membranes;cytosol;other cell component	enzyme regulator activity;nucleic acid binding activity;other molecular function	Pf00125, Pf00169, Pf00617, Pf00618, Pf00621	6654	ENSG00000115904	SOS1	A8K2G3; B4DXG2; hsa:6654; Q07889	RAC1 GTPase cycle; Role of LAT2/NTAL/LAB on calcium mobilization; GRB2:SOS provides linkage to MAPK signaling for Integrins ; RET signaling; Downstream signal transduction; Tie2 Signaling; FRS-mediated FGFR1 signaling; FRS-mediated FGFR2 signaling; FRS-mediated FGFR3 signaling; FRS-mediated FGFR4 signaling; Activated NTRK2 signals through FRS2 and FRS3; Signaling by FLT3 ITD and TKD mutants; FCER…	IL-5 signaling pathway; Integrin-mediated cell adhesion; Leptin signaling pathway; Prolactin signaling pathway; Pilocytic astrocytoma; B cell receptor signaling pathway; TNF-alpha signaling pathway; Oncostatin M signaling pathway; Alpha 6 beta 4 signaling pathway; IL-3 signaling pathway; Kit receptor signaling pathway; Focal adhesion; Hepatocyte growth factor receptor signaling; RAC1/PAK1/p38/MMP…	112	0	1.115	1.13	1.114	1.215	1.026	1.127	1.182	1.951	2.083	1.866	1.853	2.3	1.806	2.08	1.741	1.013	0.999	1.09	0.92	1.011	1.06	1.749
High	Master Protein	O43815	Striatin OS=Homo sapiens OX=9606 GN=STRN PE=1 SV=4	0	FALSE	85.721	31	16	32	15	780	86.1	5.27	89.74	16	cell-cell signaling;cell organization and biogenesis;developmental processes;signal transduction;other biological processes	plasma membrane;other membranes;cytosol;other cell component	other molecular function	Pf00400, Pf08232	6801	ENSG00000115808	STRN	hsa:6801; O43815; Q3KP65; Q53TQ8; Q9NP38	PIP3 activates AKT signaling; Extra-nuclear estrogen signaling; ALK mutants bind TKIs; Signaling by ALK fusions and activated point mutants; Constitutive Signaling by Aberrant PI3K in Cancer; PI5P, PP2A and IER3 Regulate PI3K/AKT Signaling; Signaling by cytosolic PDGFRA and PDGFRB fusion proteins		7	0	1.033	1.012	1.107	1.116	1.124	1.099	1.11	1.125	1.124	1.203	1.077	1.135	1.226	1.206	1.094	0.98	1.072	1.08	1.088	1.064	1.074	1.089
High	Master Protein	G3V3R7	Ataxin-3 (Fragment) OS=Homo sapiens OX=9606 GN=ATXN3 PE=1 SV=1	0	FALSE	17.639	23	5	7	5	329	37.7	4.82	21.78	5	protein metabolism;other metabolic processes	plasma membrane;other membranes;nucleus	other molecular function	Pf02099, Pf02809, Pf16619		ENSG00000066427	ATXN3	G3V3R7			0	0
High	Master Protein	E9PNP3	Mth938 domain-containing protein OS=Homo sapiens OX=9606 GN=AAMDC PE=1 SV=1	0	FALSE	4.817	11	1	1	1	141	15.6	9.06	3.17	1				Pf04430		ENSG00000087884	AAMDC	E9PNP3			0	0	0.873	0.816	1.095	0.877	1.025	1.444	0.748	0.585	0.817	0.75	0.627	1.205	1.095	1.007	1.224	0.934	1.255	1.005	1.174	1.654	0.857	0.67
High	Master Protein	C9JE98	Nuclear receptor corepressor 2 OS=Homo sapiens OX=9606 GN=NCOR2 PE=1 SV=1	0	FALSE	136.007	21	33	47	32	2458	267.9	7.83	111.79	33		nucleus	nucleic acid binding activity	Pf00249, Pf15784	9612	ENSG00000196498	NCOR2	C9JE98		Androgen receptor signaling pathway; Adipogenesis; Aryl hydrocarbon receptor Netpath; Notch signaling; Rett syndrome causing genes; Notch signaling pathway (Netpath)	6	1	1.133	1.076	0.909	1.152	0.748	0.833	0.851	1.155	1.21	1.164	1.295	1.595	1.452	1.566	1.362	0.949	0.802	1.017	0.66	0.735	0.751	1.019
High	Master Protein	Q9BVS4	Serine/threonine-protein kinase RIO2 OS=Homo sapiens OX=9606 GN=RIOK2 PE=1 SV=2	0	FALSE	9.777	7	3	5	3	552	63.2	5.94	11.01	3	cell cycle OR cell proliferation;protein metabolism;RNA metabolism OR transcription;other metabolic processes;other biological processes	cytosol;nucleus;other cell component	kinase activity;other molecular function	Pf01163, Pf09202	55781	ENSG00000058729	RIOK2	D6RDI3; hsa:55781; Q9BVS4; Q9NUT0	Major pathway of rRNA processing in the nucleolus and cytosol		1	0
High	Master Protein	H3BQ06	Rab-GAP TBC domain-containing protein OS=Homo sapiens OX=9606 PE=4 SV=1	0.001	FALSE	4.432	3	1	1	1	376	42.5	8.28	3.41	1	cell organization and biogenesis;developmental processes	other cell component		Pf00566							0	0
High	Master Protein	Q5T593	Protein FAM219A (Fragment) OS=Homo sapiens OX=9606 GN=FAM219A PE=1 SV=8	0	FALSE	8.076	34	2	2	2	168	18.6	4.67	8.3	2				Pf15260		ENSG00000164970	FAM219A	Q5T593			0	0
Medium	Master Protein	Q86YD5	Low-density lipoprotein receptor class A domain-containing protein 3 OS=Homo sapiens OX=9606 GN=LDLRAD3 PE=2 SV=3	0.017	FALSE	1.821	3	1	1	1	345	37.4	4.87	2.62	1	transport;other biological processes	plasma membrane;other membranes	other molecular function	Pf00057	143458	ENSG00000179241	LDLRAD3	B7Z1U3; B9EG81; hsa:143458; Q86YD5; Q8NBJ0			0	0
High	Master Protein	Q9UL54	Serine/threonine-protein kinase TAO2 OS=Homo sapiens OX=9606 GN=TAOK2 PE=1 SV=2	0	FALSE	30.596	11	8	14	7	1235	138.2	7.27	40.29	8	cell adhesion;cell cycle OR cell proliferation;cell organization and biogenesis;protein metabolism;other metabolic processes;stress response;transport;developmental processes;signal transduction;other biological processes	other membranes;cytosol;cytoskeleton;nucleus;other cell component	signal transduction activity or receptor binding;cytoskeletal activity;kinase activity;other molecular function	Pf00069	9344	ENSG00000149930	TAOK2	A5PKY1; A7MCZ2; B2RN35; B7ZM88; hsa:9344; O94957; Q6UW73; Q7LC09; Q9NSW2; Q9UL54		MAPK signaling pathway; VEGFA-VEGFR2 signaling pathway; 16p11.2 proximal deletion syndrome	3	0	0.952	0.895	0.913	1.205	0.759	0.778	0.791	0.719	0.761	0.806	0.717	0.748	0.851	0.794	0.752	0.941	0.96	1.266	0.797	0.817	0.831	0.756
High	Master Protein	Q15047	Histone-lysine N-methyltransferase SETDB1 OS=Homo sapiens OX=9606 GN=SETDB1 PE=1 SV=1	0	FALSE	4.838	2	2	2	2	1291	143.1	6.02	6.6	2	cell organization and biogenesis;protein metabolism;other metabolic processes;signal transduction;other biological processes	nucleus;other cell component	nucleic acid binding activity;other molecular function	Pf00856, Pf01429, Pf05033, Pf18300, Pf18358, Pf18359	9869	ENSG00000143379	SETDB1	A6NEW2; hsa:9869; Q15047; Q5SZD8; Q5SZD9; Q5SZE0; Q5SZE7; Q96GM9	PKMTs methylate histone lysines	Histone modifications; Malignant pleural mesothelioma	3	0	1.191	1.19	1.197	0.832	1.236	0.997	1.068	1.832	1.828	1.683	1.99	1.564	1.978	1.439	1.556	0.998	1.005	0.698	1.037	0.837	0.897	1.538
High	Master Protein	Q9UHL4	Dipeptidyl peptidase 2 OS=Homo sapiens OX=9606 GN=DPP7 PE=1 SV=3	0	FALSE	10.345	9	3	3	3	492	54.3	6.32	8.09	3	protein metabolism;transport	non-structural extracellular;cytosol;ER/Golgi;other cytoplasmic organelle;other cell component	other molecular function	Pf05577	29952	ENSG00000176978	DPP7	A8K7U7; hsa:29952; Q5VSF1; Q969X4; Q9UHL4	Neutrophil degranulation		1	0	0.887	0.86	0.946	0.648	0.788	0.826	0.856	0.482	0.417	0.491	0.479	0.634	0.694	0.594	0.634	0.969	1.066	0.731	0.889	0.931	0.965	0.544
High	Master Protein	Q9Y496	Kinesin-like protein KIF3A OS=Homo sapiens OX=9606 GN=KIF3A PE=1 SV=4	0	FALSE	27.915	8	5	12	3	699	80	6.54	39.63	5	cell cycle OR cell proliferation;cell organization and biogenesis;transport;other biological processes	cytosol;cytoskeleton;other cell component	cytoskeletal activity;other molecular function	Pf00225	11127	ENSG00000131437	KIF3A	A8MSW9; hsa:11127; Q59EN1; Q86XE9; Q9Y496; Q9Y6V4	Intraflagellar transport; COPI-dependent Golgi-to-ER retrograde traffic; Translocation of SLC2A4 (GLUT4) to the plasma membrane; MHC class II antigen presentation; Kinesins; Hedgehog 'off' state; Activation of SMO	Hedgehog signaling pathway; Endochondral ossification; Endochondral ossification with skeletal dysplasias; Insulin signaling	11	0	0.97	0.696	0.795	0.815	0.928	0.727	0.887	1.275	1.736	1.094	1.284	1.667	1.23	1.44	1.123	0.718	0.82	0.84	0.956	0.749	0.914	1.314
High	Master Protein	A0A075B7G8	Amyloid-beta A4 precursor protein-binding family B member 1 OS=Homo sapiens OX=9606 GN=APBB1 PE=1 SV=7	0	FALSE	22.479	12	5	6	4	706	76.7	4.96	23.51	5			other molecular function	Pf00397, Pf00640		ENSG00000166313	APBB1	A0A075B7G8		Alzheimer's disease and miRNA effects; Alzheimer's disease	2	0	1.148	1.373	1.628	1.102	1.195	1.165	1.337	1.962	1.813	1.897	2.137	2.03	2.142	1.985	2.194	1.196	1.419	0.96	1.041	1.016	1.165	1.71
High	Master Protein	J3KN67	Tropomyosin alpha-3 chain OS=Homo sapiens OX=9606 GN=TPM3 PE=1 SV=1	0	FALSE	71.369	46	17	73	1	285	33.2	4.77	206.54	17		cytosol;cytoskeleton	cytoskeletal activity	Pf00261		ENSG00000143549	TPM3	J3KN67		Mammary gland development pathway - Pregnancy and lactation (Stage 3 of 4)	1	15	0.963	0.944	0.781	0.599	0.929	0.946	1.005	1.83	2.025	1.897	1.719	0.933	1.025	1.035	0.858	0.98	0.811	0.622	0.964	0.982	1.044	1.9
High	Master Protein	E7EQL8	Gamma-tubulin complex component 6 OS=Homo sapiens OX=9606 GN=TUBGCP6 PE=1 SV=1	0	FALSE	13.176	2	3	3	3	1493	163.8	6.87	9.33	3	cell organization and biogenesis	cytoskeleton;other cell component	cytoskeletal activity	Pf17681, Pf19340		ENSG00000128159	TUBGCP6	E7EQL8		15q11.2 copy number variation syndrome	1	0
High	Master Protein	A0A0D9SFB1	Dynamin-1 OS=Homo sapiens OX=9606 GN=DNM1 PE=1 SV=1	0	FALSE	58.566	20	17	32	4	835	94	6.64	66.16	17	transport	cytoskeleton;nucleus	other molecular function	Pf00169, Pf00350, Pf01031, Pf02212		ENSG00000106976	DNM1	A0A0D9SFB1		Synaptic vesicle pathway; Primary focal segmental glomerulosclerosis (FSGS); One-carbon metabolism and related pathways	3	2	1.011	1.117	1.251	0.609	0.726	0.715	0.603	0.605	0.624	0.711	0.664	0.718	0.703	0.733	0.816	1.104	1.236	0.602	0.718	0.707	0.596	0.598
High	Master Protein	P15407	Fos-related antigen 1 OS=Homo sapiens OX=9606 GN=FOSL1 PE=1 SV=1	0	FALSE	26.005	19	6	13	6	271	29.4	8.02	30.25	6	cell organization and biogenesis;stress response;developmental processes;other biological processes	plasma membrane;other membranes;cytosol;nucleus;other cell component	nucleic acid binding activity;other molecular function	Pf00170	8061	ENSG00000175592	FOSL1	B4DR11; hsa:8061; P15407; Q6FG51	NGF-stimulated transcription	Integrated breast cancer pathway; Corticotropin-releasing hormone signaling pathway; Mammary gland development pathway - Puberty (Stage 2 of 4); Wnt signaling pathway and pluripotency; lncRNA in canonical Wnt signaling and colorectal cancer; Wnt signaling; ncRNAs involved in Wnt signaling in hepatocellular carcinoma; Malignant pleural mesothelioma; DNA damage response (only ATM dependent)	10	0	1.125	1.192	1.382	0.912	0.834	0.909	0.943	0.901	0.807	0.825	0.812	1.313	1.211	0.9	1.214	1.06	1.229	0.811	0.741	0.808	0.838	0.801
High	Master Protein	A0A2R8YFH3	Protein SERAC1 OS=Homo sapiens OX=9606 GN=SERAC1 PE=1 SV=1	0	FALSE	6.326	5	3	3	3	622	70.4	7.42	4.97	3						ENSG00000122335	SERAC1	A0A2R8YFH3			0	0	0.806	0.937	1.201	0.705	1.409	1.41	1.226	1.37	1.645	1.135	1.248	1.838	1.23	1.549	1.613	1.163	1.491	0.875	1.75	1.75	1.522	1.7
Medium	Master Protein	M0R2E2	Ryanodine receptor 1 (Fragment) OS=Homo sapiens OX=9606 GN=RYR1 PE=1 SV=1	0.037	FALSE	1.387	3	1	1	1	287	32.6	6.02	0	1	transport;signal transduction		transporter activity;other molecular function			ENSG00000196218	RYR1	M0R2E2		Cell-type dependent selectivity of CCK2R signaling; Airway smooth muscle cell contraction	2	0
Medium	Master Protein	Q8NGA1	Olfactory receptor 1M1 OS=Homo sapiens OX=9606 GN=OR1M1 PE=2 SV=1	0.024	FALSE	1.598	2	1	1	1	313	34.8	8.91	2.57	1	signal transduction;other biological processes	plasma membrane;other membranes	other molecular function	Pf13853	125963	ENSG00000170929	OR1M1	B9EHA6; hsa:125963; Q6IFJ3; Q8NGA1; Q96R91			0	0	0.679	0.857	1.127	0.392	0.901	0.907	0.791	1.056	0.833	0.922	0.996	0.869	1.238	1.14	1.314	1.263	1.66	0.578	1.327	1.336	1.165	1.556
High	Master Protein	Q4R9M9	Kinesin family member 1Bbeta isoform II OS=Homo sapiens OX=9606 GN=KIF1B PE=1 SV=1	0	FALSE	34.519	8	12	17	3	1809	203.5	5.55	39.79	12	other biological processes	cytoskeleton;other cell component	cytoskeletal activity;other molecular function	Pf00169, Pf00225, Pf00498, Pf12423, Pf12473, Pf16183		ENSG00000054523	KIF1B	Q4R9M9		Intracellular trafficking proteins involved in CMT neuropathy	1	1	1.306	1.181	0.998	0.961	1.043	0.953	1.036	1.988	1.795	1.347	1.765	1.693	1.515	1.661	1.44	0.904	0.764	0.736	0.799	0.73	0.793	1.522
High	Master Protein	A0A2R8Y3T0	Cochlin OS=Homo sapiens OX=9606 GN=COCH PE=1 SV=1	0.004	FALSE	2.581	2	1	1	1	513	55.4	8.27	2.72	1	stress response;other biological processes	extracellular matrix		Pf00092, Pf03815		ENSG00000100473	COCH	A0A2R8Y3T0			0	0
High	Master Protein	Q9H1E3	Nuclear ubiquitous casein and cyclin-dependent kinase substrate 1 OS=Homo sapiens OX=9606 GN=NUCKS1 PE=1 SV=1	0	FALSE	28.956	34	5	10	5	243	27.3	5.08	34.9	5	cell organization and biogenesis;DNA metabolism;other metabolic processes;stress response;other biological processes	nucleus;other cell component	nucleic acid binding activity;other molecular function		64710	ENSG00000069275	NUCKS1	hsa:64710; Q54AC0; Q5PXE7; Q9H1D6; Q9H1E3; Q9H723			0	0	0.962	1.103	1.186	0.747	1.084	1.086	1.155	0.858	0.939	0.781	0.723	0.612	0.559	0.53	0.618	1.147	1.233	0.777	1.127	1.13	1.201	0.893
High	Master Protein	O60645	Exocyst complex component 3 OS=Homo sapiens OX=9606 GN=EXOC3 PE=1 SV=3	0	FALSE	64.96	34	18	27	18	745	85.5	6.29	69.08	18	cell organization and biogenesis;transport;other biological processes	plasma membrane;other membranes;cytosol;ER/Golgi;other cell component	other molecular function	Pf06046	11336	ENSG00000180104	EXOC3	hsa:11336; O60645; Q6P2E8; Q8TEN6; Q8WUW0; Q96DI4	Translocation of SLC2A4 (GLUT4) to the plasma membrane; Insulin processing; VxPx cargo-targeting to cilium	Ciliary landscape	4	0	1.037	1.051	1.272	1.397	1.301	1.206	1.211	0.979	1.074	1.077	0.96	1.039	1.068	1.05	1.05	1.014	1.227	1.348	1.255	1.164	1.168	0.945
High	Master Protein	K7EL44	CDP-diacylglycerol--glycerol-3-phosphate 3-phosphatidyltransferase (Fragment) OS=Homo sapiens OX=9606 GN=PGS1 PE=1 SV=1	0	FALSE	10.068	8	3	3	1	384	43.3	8.62	7.85	3	other metabolic processes	mitochondrion	other molecular function			ENSG00000087157	PGS1	K7EL44			0	0
High	Master Protein	I3L4T6	TBC1 domain family member 16 (Fragment) OS=Homo sapiens OX=9606 GN=TBC1D16 PE=1 SV=1	0.002	FALSE	3.123	11	1	1	1	190	22.6	5.94	3.77	1				Pf00566		ENSG00000167291	TBC1D16	I3L4T6			0	0
High	Master Protein	Q86U28	Iron-sulfur cluster assembly 2 homolog, mitochondrial OS=Homo sapiens OX=9606 GN=ISCA2 PE=1 SV=2	0	FALSE	6.772	16	2	2	2	154	16.5	5.25	6.07	2	cell organization and biogenesis;protein metabolism;other metabolic processes	mitochondrion	other molecular function	Pf01521	122961	ENSG00000165898	ISCA2	A6NFF1; A8K3W3; G3V291; hsa:122961; Q86U28; Q8IYZ0; Q96BB2	Mitochondrial iron-sulfur cluster biogenesis		1	0	0.627	0.783	0.661	1.155	1.022	1.041	0.98	0.689	0.949	0.813	0.772	0.659	0.928	0.679	0.912	1.248	1.055	1.842	1.63	1.659	1.562	1.098
High	Master Protein	Q9P1F3	Costars family protein ABRACL OS=Homo sapiens OX=9606 GN=ABRACL PE=1 SV=1	0	FALSE	5.13	30	1	1	1	81	9.1	6.29	3.27	1	other biological processes			Pf14705	58527	ENSG00000146386	ABRACL	hsa:58527; Q5SZC8; Q9P0A1; Q9P1F3			0	0
High	Master Protein	K7EIY6	E3 ubiquitin-protein ligase RNF126 (Fragment) OS=Homo sapiens OX=9606 GN=RNF126 PE=1 SV=7	0.003	FALSE	2.892	5	1	1	1	283	30.8	5	2.68	1	protein metabolism;other metabolic processes	cytosol;nucleus	other molecular function	Pf13639, Pf14369		ENSG00000070423	RNF126	K7EIY6			0	0
Medium	Master Protein	A0A0G2JJ84	Butyrophilin-like protein 2 OS=Homo sapiens OX=9606 GN=BTNL2 PE=4 SV=1	0.018	FALSE	1.786	2	1	1	1	482	53.5	5.19	2.14	1		other membranes		Pf07686		ENSG00000224242; ENSG00000225412; ENSG00000225845	BTNL2	A0A0G2JJ84			0	0
High	Master Protein	A0A0G2JNY3	Rho GTPase-activating protein 27 OS=Homo sapiens OX=9606 GN=ARHGAP27 PE=1 SV=1	0	FALSE	6.879	4	2	2	2	889	98.4	5.64	6.21	2	signal transduction;other biological processes		enzyme regulator activity	Pf00169, Pf00397, Pf00620		ENSG00000276836	ARHGAP27	A0A0G2JNY3			0	0
High	Master Protein	A0A0G2JMX7	Microtubule-associated protein OS=Homo sapiens OX=9606 GN=MAPT PE=1 SV=1	0.003	TRUE	2.806	2	1	1	1	776	80.9	7.11	2.89	1		plasma membrane;other membranes;cytosol;cytoskeleton;other cell component	cytoskeletal activity	Pf00418		ENSG00000277956	MAPT	A0A0G2JMX7			0	0
High	Master Protein	A0A3B3ISA1	GATOR complex protein WDR24 OS=Homo sapiens OX=9606 GN=WDR24 PE=1 SV=1	0	FALSE	11.402	6	4	5	4	864	96.2	6.65	11.68	4	other biological processes			Pf00400		ENSG00000127580	WDR24	A0A3B3ISA1			0	0
High	Master Protein	Q6ZR64	HBV PreS1-transactivated protein 1 OS=Homo sapiens OX=9606 GN=MXRA7 PE=1 SV=1	0	FALSE	13.814	17	4	11	1	213	23.4	6.52	34.65	4					439921	ENSG00000182534	MXRA7	Q6ZR64			0	0
High	Master Protein	E9PS76	Probable RNA-binding protein EIF1AD (Fragment) OS=Homo sapiens OX=9606 GN=EIF1AD PE=1 SV=1	0	FALSE	9.666	29	2	3	2	114	13.2	8.7	8.89	2	protein metabolism;other metabolic processes	cytoskeleton;nucleus;other cell component	nucleic acid binding activity	Pf01176		ENSG00000175376	EIF1AD	E9PS76			0	0	1.187	1.003	0.779	0.594	0.571	0.64	0.56	0.667	0.696	0.836	0.554	0.742	0.863	0.826	0.681	0.845	0.656	0.501	0.481	0.539	0.471	0.562
High	Master Protein	Q9NR28	Diablo homolog, mitochondrial OS=Homo sapiens OX=9606 GN=DIABLO PE=1 SV=1	0	FALSE	52.238	66	12	29	12	239	27.1	5.9	85.37	12	stress response;signal transduction;other biological processes	plasma membrane;other membranes;cytosol;mitochondrion		Pf09057	56616	ENSG00000184047	DIABLO	B2RDQ0; hsa:56616; Q6W3F3; Q96LV0; Q9BT11; Q9HAV6; Q9NR28	SMAC (DIABLO) binds to IAPs ; SMAC(DIABLO)-mediated dissociation of IAP:caspase complexes ; Regulation of the apoptosome activity; Release of apoptotic factors from the mitochondria	TNF-alpha signaling pathway; Nanomaterial induced apoptosis; Apoptosis; Complement system in neuronal development and plasticity	9	0	0.919	1.083	1.285	0.541	1.201	1.193	1.225	0.923	0.992	0.972	1.042	0.938	1.086	0.954	1.179	1.179	1.399	0.589	1.307	1.299	1.333	1.005
High	Master Protein	Q6XZF7	Dynamin-binding protein OS=Homo sapiens OX=9606 GN=DNMBP PE=1 SV=1	0	FALSE	130.541	28	34	59	34	1577	177.2	5.39	150.06	34	signal transduction;other biological processes	cytoskeleton;ER/Golgi;other cell component	enzyme regulator activity	Pf00018, Pf00621, Pf03114, Pf07653, Pf14604	23268	ENSG00000107554	DNMBP	hsa:23268; Q6XZF7; Q8IVY3; Q9Y2L3	CDC42 GTPase cycle		1	0	1.226	1.183	1.032	1.108	0.935	0.958	1.042	1.608	1.483	1.602	1.568	1.31	1.112	1.228	1.118	0.965	0.842	0.903	0.762	0.781	0.85	1.311
High	Master Protein	Q12996	Cleavage stimulation factor subunit 3 OS=Homo sapiens OX=9606 GN=CSTF3 PE=1 SV=1	0	FALSE	84.986	32	16	34	16	717	82.9	8.12	97.53	16	RNA metabolism OR transcription;other metabolic processes	nucleus	nucleic acid binding activity	Pf05843	1479	ENSG00000176102	CSTF3	A8K471; D3DR04; E9PB40; hsa:1479; Q12996; Q32P22; Q96FQ8; Q96QD6; Q96QK4	mRNA Splicing - Major Pathway; mRNA 3'-end processing; RNA Polymerase II Transcription Termination; Processing of Intronless Pre-mRNAs	mRNA processing	5	0	1.101	1.027	0.986	0.791	0.65	0.681	0.68	1.285	1.205	1.293	1.328	1.366	1.346	1.173	1.352	0.933	0.896	0.718	0.59	0.619	0.618	1.167
High	Master Protein	Q9UHQ1	Nuclear prelamin A recognition factor OS=Homo sapiens OX=9606 GN=NARF PE=1 SV=1	0	FALSE	7.18	5	1	1	1	456	51.1	7.08	4.69	1		cytoskeleton;nucleus	other molecular function	Pf02256, Pf02906	26502	ENSG00000141562	NARF	A6NCJ3; B3KPX2; hsa:26502; K4DI98; Q96AY9; Q9BWC6; Q9UHQ1			0	0
High	Master Protein	Q9BVC4	Target of rapamycin complex subunit LST8 OS=Homo sapiens OX=9606 GN=MLST8 PE=1 SV=1	0	FALSE	20.213	15	4	11	4	326	35.9	5.86	34.1	4	stress response;signal transduction;other biological processes	cytosol;nucleus;other cell component	enzyme regulator activity	Pf00400	64223	ENSG00000167965	MLST8	B3KMM4; B4DY00; D3DU88; hsa:64223; Q5M800; Q86Y18; Q8WUI5; Q9BVC4; Q9HA66; Q9UJV6	Constitutive Signaling by AKT1 E17K in Cancer; Regulation of TP53 Degradation; PIP3 activates AKT signaling; CD28 dependent PI3K/Akt signaling; VEGFR2 mediated vascular permeability; Macroautophagy; TP53 Regulates Metabolic Genes; Amino acids regulate mTORC1; Regulation of PTEN gene transcription; mTORC1-mediated signalling; Energy dependent regulation of mTOR by LKB1-AMPK; HSF1-dependent transac…	Regulation of toll-like receptor signaling pathway; Target of rapamycin (TOR) signaling; Factors and pathways affecting insulin-like growth factor (IGF1)-Akt signaling; VEGFA-VEGFR2 signaling pathway; Angiopoietin-like protein 8 regulatory pathway; Focal adhesion: PI3K-Akt-mTOR-signaling pathway; Clear cell renal cell carcinoma pathways; PI3K-Akt signaling pathway; Thermogenesis; Fragile X syndro…	31	0	0.867	0.945	0.865	0.963	0.84	0.792	0.851	1.049	1.067	1.122	1.07	1.028	1.04	1.028	0.923	1.089	0.998	1.11	0.969	0.913	0.981	1.21
High	Master Protein	G3XAN8	Mitochondrial import inner membrane translocase subunit Tim8 B OS=Homo sapiens OX=9606 GN=TIMM8B PE=1 SV=1	0	FALSE	11.797	27	3	5	3	98	11.1	8.1	11.74	3		other membranes;mitochondrion		Pf02953	26521	ENSG00000150779	TIMM8B	G3XAN8; hsa:26521			0	0	0.643	0.871	0.961	0.896	1.026	1.208	0.941	0.718	1.157	0.888	1.013	1.344	1.481	1.389	1.362	1.355	1.495	1.394	1.596	1.879	1.463	1.117
High	Master Protein	A0A2R8Y4Q0	DnaJ homolog subfamily C member 21 OS=Homo sapiens OX=9606 GN=DNAJC21 PE=1 SV=1	0.004	FALSE	2.746	4	1	2	1	473	55.2	6.21	3.44	1			nucleic acid binding activity;other molecular function	Pf12171		ENSG00000168724	DNAJC21	A0A2R8Y4Q0			0	0
High	Master Protein	P34810	Macrosialin OS=Homo sapiens OX=9606 GN=CD68 PE=1 SV=2	0	FALSE	4.923	15	2	2	2	354	37.4	8.87	6.85	2	cell-cell signaling;stress response;transport;other biological processes	plasma membrane;other membranes;other cytoplasmic organelle		Pf01299	968	ENSG00000129226	CD68	B4DVT4; hsa:968; P34810; Q53HR6; Q53XI3; Q96BI7	Neutrophil degranulation	Macrophage markers	2	0
High	Master Protein	E7ERP7	Apolipoprotein E (Fragment) OS=Homo sapiens OX=9606 GN=APOE PE=1 SV=1	0	FALSE	5.768	11	1	1	1	219	24.9	5.85	5.21	1	protein metabolism;other metabolic processes;transport	non-structural extracellular	other molecular function	Pf01442		ENSG00000130203	APOE	E7ERP7		Alzheimer's disease and miRNA effects; ApoE and miR-146 in inflammation and atherosclerosis; Familial hyperlipidemia type 3; Alzheimer's disease	4	0
High	Master Protein	Q8TBE7	Solute carrier family 35 member G2 OS=Homo sapiens OX=9606 GN=SLC35G2 PE=1 SV=3	0	FALSE	15.894	17	3	10	3	412	46.4	7.34	34.49	3		plasma membrane;other membranes;ER/Golgi		Pf00892	80723	ENSG00000168917	SLC35G2	B2RA80; D3DNE1; hsa:80723; Q8TBE7; Q9BWN4; Q9H0S6			0	0	1.022	0.985	0.793	0.996	0.794	0.856	0.718	0.464	0.426	0.468	0.441	0.578	0.649	0.627	0.636	0.964	0.776	0.975	0.777	0.837	0.703	0.455
High	Master Protein	F5GXK4	TBC1 domain family member 14 OS=Homo sapiens OX=9606 GN=TBC1D14 PE=1 SV=2	0.008	FALSE	2.23	3	1	1	1	353	40.8	6.46	2.97	1				Pf00566	57533	ENSG00000132405	TBC1D14	F5GXK4			0	0	1.123	1.212	1.075	0.861	0.822	0.775	1.053	1.186	1.374	1.411	1.488	1.149	1.18	1.067	0.993	1.079	0.957	0.766	0.732	0.69	0.937	1.056
High	Master Protein	A0A2R8Y7Q1	Nucleosome-remodeling factor subunit BPTF OS=Homo sapiens OX=9606 GN=BPTF PE=1 SV=1	0	FALSE	64.926	8	17	25	17	2965	330.6	6.1	74.37	17	other biological processes	nucleus	other molecular function	Pf00439, Pf00628, Pf02791, Pf15613		ENSG00000171634	BPTF	A0A2R8Y7Q1		Endoderm differentiation; 16p11.2 proximal deletion syndrome	2	0	1.179	1.238	1.406	0.89	0.862	0.875	0.893	1.398	1.187	1.237	1.509	1.534	1.671	1.172	1.63	1.05	1.193	0.756	0.731	0.742	0.758	1.187
High	Master Protein	Q9NYB9	Abl interactor 2 OS=Homo sapiens OX=9606 GN=ABI2 PE=1 SV=1	0	FALSE	37.718	21	9	17	4	513	55.6	6.16	45.03	9	cell organization and biogenesis;protein metabolism;other metabolic processes;developmental processes;signal transduction;other biological processes	cytosol;cytoskeleton;nucleus;other cell component	other molecular function	Pf07815, Pf14604	10152	ENSG00000138443	ABI2	B4DSN1; hsa:10152; Q13147; Q13249; Q13801; Q9BV70; Q9NYB9	VEGFA-VEGFR2 Pathway; RAC1 GTPase cycle; RAC3 GTPase cycle; RAC2 GTPase cycle; Regulation of actin dynamics for phagocytic cup formation; FCGR3A-mediated phagocytosis; RHO GTPases Activate WASPs and WAVEs	Regulation of actin cytoskeleton	8	1	1.012	0.983	0.9	0.987	1.063	0.826	0.853	1.327	1.472	1.321	1.286	1.065	1.076	1.083	1.099	0.971	0.89	0.975	1.05	0.816	0.843	1.311
High	Master Protein	F2Z2T0	Rab-like protein 6 OS=Homo sapiens OX=9606 GN=RABL6 PE=1 SV=1	0	FALSE	8.289	11	4	4	1	484	53.8	7.94	6.83	4			other molecular function	Pf08477		ENSG00000196642	RABL6	F2Z2T0			0	0	1.264	1.161	0.929	0.984	1.305	1.109	0.584	1.796	1.405	1.556	1.868	1.157	1.517	1.302	1.318	0.919	0.735	0.778	1.032	0.878	0.462	1.421
High	Master Protein	Q9Y6I4	Ubiquitin carboxyl-terminal hydrolase 3 OS=Homo sapiens OX=9606 GN=USP3 PE=1 SV=2	0	FALSE	26.386	16	6	9	6	520	58.9	8.18	30.6	6	cell cycle OR cell proliferation;protein metabolism;DNA metabolism;other metabolic processes;stress response;other biological processes	nucleus;other cell component	nucleic acid binding activity;other molecular function	Pf00443, Pf02148	9960	ENSG00000140455	USP3	B4DVU5; F5H1A6; hsa:9960; Q8WVD0; Q9Y6I4	Ub-specific processing proteases		1	0
High	Master Protein	Q99590	Protein SCAF11 OS=Homo sapiens OX=9606 GN=SCAF11 PE=1 SV=2	0	FALSE	30.113	8	8	13	8	1463	164.6	8.41	35.08	8	cell organization and biogenesis;RNA metabolism OR transcription;other metabolic processes	nucleus	other molecular function		9169	ENSG00000139218	SCAF11	A6NEU9; A6NLW5; hsa:9169; Q8IW59; Q99590		Apoptosis	1	0	1.444	1.003	1.228	1.519	0.723	0.952	1.084	1.722	1.555	1.737	1.955	1.763	1.473	1.159	1.751	0.695	0.851	1.052	0.501	0.659	0.751	1.193
High	Master Protein	Q9H9Q4	Non-homologous end-joining factor 1 OS=Homo sapiens OX=9606 GN=NHEJ1 PE=1 SV=1	0	FALSE	18.966	23	4	6	4	299	33.3	5.97	20.76	4	DNA metabolism;other metabolic processes;stress response;developmental processes;other biological processes	nucleus;other cell component	nucleic acid binding activity	Pf09302	79840	ENSG00000187736	NHEJ1	B8ZZA4; hsa:79840; Q4ZFW7; Q6IA64; Q96JS9; Q9H9Q4	Nonhomologous End-Joining (NHEJ)	Non-homologous end joining; DNA repair pathways, full network	3	0	1.13	0.833	1.585	1.192	0.959	1.276	1.02	1.833	2.02	2.083	2	2.218	1.676	1.751	1.736	0.737	1.403	1.054	0.849	1.129	0.902	1.622
High	Master Protein	A0A2R8Y5V9	Tropomyosin alpha-4 chain OS=Homo sapiens OX=9606 GN=TPM4 PE=1 SV=1	0	FALSE	69.614	48	13	59	1	248	28.6	4.7	168.07	13		cytoskeleton	cytoskeletal activity	Pf00261		ENSG00000167460	TPM4	A0A2R8Y5V9			0	0	0.814	0.944	0.591	0.455	0.662	0.69	0.456	0.822	0.787	0.853	0.63	0.448	0.799	0.791	0.673	1.16	0.726	0.559	0.814	0.848	0.56	1.009
High	Master Protein	E5RHK9	Clathrin coat assembly protein AP180 OS=Homo sapiens OX=9606 GN=SNAP91 PE=1 SV=1	0	FALSE	5.062	18	2	3	1	120	13.2	9.2	7.48	2			other molecular function	Pf07651		ENSG00000065609	SNAP91	E5RHK9			0	0
High	Master Protein	E9PR23	Immunoglobulin-like domain-containing receptor 2 OS=Homo sapiens OX=9606 GN=ILDR2 PE=1 SV=1	0.008	FALSE	2.243	5	1	1	1	512	58	8.97	2.28	1						ENSG00000143195	ILDR2	E9PR23			0	0
High	Master Protein	Q12815	Tastin OS=Homo sapiens OX=9606 GN=TROAP PE=1 SV=3	0.002	FALSE	3.382	3	1	1	1	778	83.8	7.36	3.3	1	cell adhesion	other cell component			10024	ENSG00000135451	TROAP	F8VSF9; hsa:10024; Q12815; Q6PJU7; Q8N5B2			0	0
High	Master Protein	Q9BUH6	Protein PAXX OS=Homo sapiens OX=9606 GN=PAXX PE=1 SV=2	0	FALSE	6.563	13	2	3	2	204	21.6	5.48	7.67	2	DNA metabolism;other metabolic processes;stress response	nucleus;other cell component	other molecular function	Pf15384	286257	ENSG00000148362	PAXX	hsa:286257; Q8IY19; Q9BUH6			0	0
High	Master Protein	O15530	3-phosphoinositide-dependent protein kinase 1 OS=Homo sapiens OX=9606 GN=PDPK1 PE=1 SV=1	0	FALSE	16.572	10	4	5	4	556	63.1	7.36	16.09	4	cell adhesion;cell organization and biogenesis;protein metabolism;other metabolic processes;stress response;developmental processes;signal transduction;other biological processes	plasma membrane;other membranes;cytosol;nucleus;other cell component	signal transduction activity or receptor binding;enzyme regulator activity;kinase activity;other molecular function	Pf00069, Pf14593	5170	ENSG00000140992	PDPK1	H0Y4Z0; hsa:5170; O15530; Q59EH6; Q6FI20; Q8IV52; Q9BRD5	Role of LAT2/NTAL/LAB on calcium mobilization; FCERI mediated NF-kB activation; Downstream TCR signaling; CLEC7A (Dectin-1) signaling; Constitutive Signaling by AKT1 E17K in Cancer; Regulation of TP53 Degradation; PIP3 activates AKT signaling; GPVI-mediated activation cascade; CD28 dependent PI3K/Akt signaling; G beta:gamma signalling through PI3Kgamma; RHO GTPases activate PKNs; Activation of AK…	MicroRNAs in cardiomyocyte hypertrophy; Integrin-mediated cell adhesion; Thyroid stimulating hormone (TSH) signaling pathway; Glioblastoma signaling pathways; B cell receptor signaling pathway; Interleukin-11 signaling pathway; Brain-derived neurotrophic factor (BDNF) signaling pathway; Cardiac hypertrophic response; Focal adhesion; VEGFA-VEGFR2 signaling pathway; Angiopoietin-like protein 8 regu…	40	0	1.392	1.212	1.128	1.214	1.001	1.043	1.098	2.394	2.504	2.519	2.613	2.246	1.768	2.047	1.542	0.87	0.81	0.872	0.719	0.749	0.788	1.719
High	Master Protein	O95749	Geranylgeranyl pyrophosphate synthase OS=Homo sapiens OX=9606 GN=GGPS1 PE=1 SV=1	0.005	FALSE	2.427	3	1	1	1	300	34.8	6.14	2.78	1	other metabolic processes;other biological processes	cytosol	other molecular function	Pf00348	9453	ENSG00000152904	GGPS1	A8MVQ8; hsa:9453; O95749; Q5T2C8; Q6NW19	Activation of gene expression by SREBF (SREBP); Cholesterol biosynthesis	Cholesterol metabolism with Bloch and Kandutsch-Russell pathways	3	0	0.69	0.855	1.274	0.298	1.046	0.737	0.775	0.676	0.657	0.732	0.708	0.394	0.378	0.563	0.363	1.24	1.846	0.431	1.515	1.067	1.123	0.98
High	Master Protein	Q6P1L5	Protein FAM117B OS=Homo sapiens OX=9606 GN=FAM117B PE=1 SV=2	0.005	FALSE	2.429	4	1	1	1	589	61.9	9.82	0	1				Pf15388	150864	ENSG00000138439	FAM117B	hsa:150864; Q53QZ5; Q585T9; Q6P1L5; Q8N8W1; Q96Q34			0	0
High	Master Protein	I3L3Y9	G protein pathway suppressor 2 (Fragment) OS=Homo sapiens OX=9606 GN=GPS2 PE=1 SV=1	0	FALSE	6.857	6	2	2	2	327	36.4	9.64	5.88	2				Pf15991		ENSG00000132522	GPS2	I3L3Y9		Rett syndrome causing genes	1	0	1.042	0.854	1.105	0.933	0.538	0.687	0.771	0.746	0.828	0.761	1.007	1.053	1.084	0.985	0.982	0.819	1.061	0.895	0.516	0.659	0.74	0.716
Medium	Master Protein	Q5U5Z8	Cytosolic carboxypeptidase 2 OS=Homo sapiens OX=9606 GN=AGBL2 PE=1 SV=2	0.026	FALSE	1.543	2	1	1	1	902	104.1	9	2.19	1	protein metabolism;other metabolic processes	cytosol;cytoskeleton	other molecular function	Pf00246, Pf18027	79841	ENSG00000165923; ENSG00000285501	AGBL2	A8MPX2; hsa:79841; Q53FV5; Q5U5Z8; Q8IV57; Q9H5C0	Carboxyterminal post-translational modifications of tubulin		1	0
High	Master Protein	Q9NZC9	SWI/SNF-related matrix-associated actin-dependent regulator of chromatin subfamily A-like protein 1 OS=Homo sapiens OX=9606 GN=SMARCAL1 PE=1 SV=1	0	FALSE	31.303	12	8	15	8	954	105.9	9.06	41.73	8	cell organization and biogenesis;DNA metabolism;other metabolic processes;stress response;other biological processes	nucleus;other cell component	nucleic acid binding activity;other molecular function	Pf00176, Pf00271, Pf07443	50485	ENSG00000138375	SMARCAL1	A6NEH0; hsa:50485; Q53R00; Q96AY1; Q9NXQ5; Q9NZC9; Q9UFH3; Q9UI93		Primary focal segmental glomerulosclerosis (FSGS); Nephrotic syndrome	2	0	1.316	1.197	1.459	1.367	1.12	0.899	1.111	1.209	1.511	1.229	1.356	1.212	1.338	1.093	1.233	0.91	1.109	1.039	0.851	0.683	0.845	0.919
High	Master Protein	O43824	Putative GTP-binding protein 6 OS=Homo sapiens OX=9606 GN=GTPBP6 PE=2 SV=4	0	FALSE	12.437	8	2	3	2	516	56.9	9.42	12.1	2		other cell component	translation activity;other molecular function	Pf01926, Pf13167, Pf16360	8225	ENSG00000178605	GTPBP6	H0Y2S1; hsa:8225; O43824; Q53F77; Q5HYX8			0	0	0.743	0.643	0.573	1.511	1.185	0.963	1.486	1.297	1.481	0.98	1.031	1.107	1.092	0.944	1.288	0.866	0.772	2.035	1.596	1.297	2.001	1.747
High	Master Protein	Q8ND24	RING finger protein 214 OS=Homo sapiens OX=9606 GN=RNF214 PE=1 SV=2	0	FALSE	44.809	19	12	27	12	703	77.6	6.95	65.71	12	protein metabolism;other metabolic processes		other molecular function		257160	ENSG00000167257	RNF214	B2RUW0; B4DTD1; hsa:257160; Q8ND24			0	0	1.089	1.044	0.946	1.192	1.152	1.214	1.203	1.582	1.638	1.605	1.562	1.299	1.354	1.463	1.404	0.959	0.869	1.095	1.058	1.115	1.105	1.453
High	Master Protein	Q9UPR0	Inactive phospholipase C-like protein 2 OS=Homo sapiens OX=9606 GN=PLCL2 PE=1 SV=2	0	FALSE	7.041	3	2	3	2	1127	125.8	6.9	8.98	2	cell-cell signaling;cell cycle OR cell proliferation;other metabolic processes;developmental processes;signal transduction;other biological processes	other cell component	signal transduction activity or receptor binding;other molecular function	Pf00168, Pf00387, Pf00388, Pf09279, Pf16457	23228	ENSG00000154822; ENSG00000284017	PLCL2	A8K5V4; hsa:23228; Q8N498; Q9H8L0; Q9UFP9; Q9UPR0			0	0
High	Master Protein	P48739	Phosphatidylinositol transfer protein beta isoform OS=Homo sapiens OX=9606 GN=PITPNB PE=1 SV=2	0	FALSE	31.329	36	10	24	8	271	31.5	6.87	59.02	10	cell organization and biogenesis;other metabolic processes;transport	other membranes;ER/Golgi;other cell component	transporter activity;other molecular function	Pf02121	23760	ENSG00000180957	PITPNB	B3KYB8; B7Z7Q0; hsa:23760; P48739; Q8N5W1	PI and PC transport between ER and Golgi membranes		1	2	1.086	1.095	0.874	0.964	1.063	1.15	1.095	1.887	1.769	1.79	1.849	1.445	1.249	1.396	1.244	1.008	0.805	0.888	0.978	1.059	1.008	1.737
High	Master Protein	Q00341	Vigilin OS=Homo sapiens OX=9606 GN=HDLBP PE=1 SV=2	0	FALSE	317.843	53	54	161	54	1268	141.4	6.87	476.3	54	other metabolic processes;transport;other biological processes	non-structural extracellular;plasma membrane;other membranes;cytosol;nucleus;other cell component	nucleic acid binding activity;other molecular function	Pf00013	3069	ENSG00000115677	HDLBP	B4DTQ2; E7EM71; hsa:3069; Q00341; Q53QU2; Q9UCY3	HDL clearance		1	0	1.069	1.029	0.91	1.297	0.94	0.905	0.909	0.66	0.665	0.662	0.671	0.799	0.756	0.821	0.817	0.962	0.851	1.213	0.879	0.847	0.85	0.618
High	Master Protein	E7END4	Lysyl oxidase homolog 3 OS=Homo sapiens OX=9606 GN=LOXL3 PE=1 SV=1	0.002	FALSE	3.132	1	1	1	1	697	77.1	6.83	2.95	1	protein metabolism;other metabolic processes;transport	non-structural extracellular;other membranes	other molecular function	Pf00530, Pf01186		ENSG00000115318	LOXL3	E7END4		TYROBP causal network in microglia	1	0
High	Master Protein	Q96D71	RalBP1-associated Eps domain-containing protein 1 OS=Homo sapiens OX=9606 GN=REPS1 PE=1 SV=3	0	FALSE	25.477	17	9	12	9	796	86.6	5.69	33.86	9	cell organization and biogenesis;transport	plasma membrane;other membranes;cytosol	other molecular function	Pf12763	85021	ENSG00000135597	REPS1	B7ZBZ8; B7ZBZ9; B7ZC00; hsa:85021; J3KP76; Q5JWJ5; Q5JWJ6; Q5JWJ7; Q8NDR7; Q8WU62; Q96D71; Q9BXY9	Cargo recognition for clathrin-mediated endocytosis		2	0	0.959	0.999	0.98	1.577	1.091	1.121	1.06	1.028	1.02	0.977	1.087	0.973	0.949	0.931	0.885	1.042	1.022	1.644	1.138	1.169	1.105	1.072
High	Master Protein	A6NNK5	TP53-binding protein 1 OS=Homo sapiens OX=9606 GN=TP53BP1 PE=1 SV=2	0	FALSE	32.055	7	8	14	8	1927	208.9	4.67	37.2	8		nucleus		Pf09038, Pf18428	7158	ENSG00000067369	TP53BP1	A6NNK5		ATM signaling pathway; ATM signaling in development and disease	2	0
High	Master Protein	Q9ULM6	CCR4-NOT transcription complex subunit 6 OS=Homo sapiens OX=9606 GN=CNOT6 PE=1 SV=2	0	FALSE	5.982	2	1	1	1	557	63.3	7.27	3.47	1	cell cycle OR cell proliferation;RNA metabolism OR transcription;other metabolic processes;stress response;signal transduction;other biological processes	cytosol;nucleus;other cell component	nucleic acid binding activity;other molecular function	Pf03372, Pf13855		ENSG00000113300	CNOT6	A7MD46; D3DWR0; Q9ULM6	Activation of anterior HOX genes in hindbrain development during early embryogenesis; Deadenylation of mRNA; TP53 regulates transcription of additional cell cycle genes whose exact role in the p53 pathway remain uncertain		3	0	1.123	1.239	1.221	1.304	1.112	1.326	1.164	1.069	0.984	1.154	1.16	1.312	0.956	1.058	1.17	1.103	1.087	1.161	0.99	1.18	1.036	0.952
High	Master Protein	Q9H1C4	Protein unc-93 homolog B1 OS=Homo sapiens OX=9606 GN=UNC93B1 PE=1 SV=2	0	FALSE	7.388	4	2	2	2	597	66.6	6.96	4.58	2	stress response;transport;signal transduction;other biological processes	other membranes;ER/Golgi;other cytoplasmic organelle;other cell component	signal transduction activity or receptor binding	Pf05978	81622	ENSG00000110057	UNC93B1	hsa:81622; O95764; Q569H6; Q710D4; Q9H1C4	Trafficking and processing of endosomal TLR; UNC93B1 deficiency - HSE		2	0	0.968	0.894	0.893	0.769	0.855	0.82	0.863	0.615	0.428	0.468	0.511	0.569	0.529	0.459	0.507	0.924	0.923	0.795	0.883	0.847	0.892	0.636
Medium	Master Protein	H7C0T2	Inositol 1,4,5-trisphosphate receptor-interacting protein-like 1 (Fragment) OS=Homo sapiens OX=9606 GN=ITPRIPL1 PE=1 SV=1	0.03	FALSE	1.483	2	1	1	1	587	66.8	6.55	0	1		other membranes		Pf03281		ENSG00000198885	ITPRIPL1	H7C0T2			0	0
High	Master Protein	A0A494C0S0	Sorting nexin-25 OS=Homo sapiens OX=9606 GN=SNX25 PE=1 SV=1	0	FALSE	12.381	6	3	6	3	1004	114.1	6.92	20.25	3	transport;other biological processes	other membranes	other molecular function	Pf00615, Pf00787, Pf02194, Pf08628		ENSG00000109762	SNX25	A0A494C0S0			0	0	0.904	0.985	1.182	0.958	1.015	1.142	1.008	0.875	0.853	0.82	0.777	0.894	1.055	0.898	0.984	1.089	1.307	1.06	1.122	1.263	1.114	0.968
High	Master Protein	O94967	WD repeat-containing protein 47 OS=Homo sapiens OX=9606 GN=WDR47 PE=1 SV=1	0	FALSE	16.205	7	3	4	3	919	101.9	5.94	17.25	3	developmental processes	cytoskeleton;other cell component		Pf00400, Pf17814	22911	ENSG00000085433	WDR47	A8MX09; hsa:22911; O94967; Q5TYV7; Q5TYV8; Q5TYV9; Q8IXT7; Q8IYU9			0	0	1.437	1.351	2.224	1.311	1.209	1.557	1.661	2.886	2.955	3.05	2.902	2.459	1.524	1.741	1.275	0.94	1.548	0.912	0.841	1.084	1.156	2.009
High	Master Protein	A0A3F2YNW7	AT-rich interactive domain-containing protein 1B OS=Homo sapiens OX=9606 GN=ARID1B PE=1 SV=1	0	FALSE	9.093	2	3	5	3	2332	245.3	6.86	12.58	3	cell organization and biogenesis	nucleus	nucleic acid binding activity	Pf01388, Pf12031		ENSG00000049618	ARID1B	A0A3F2YNW7		Tumor suppressor activity of SMARCB1; Thermogenesis	2	0	0.948	0.557	1.174	0.476	0.524	0.481	0.452	0.811	0.858	0.822	0.929	1.193	1.357	1.128	1.266	0.587	1.238	0.502	0.553	0.507	0.477	0.856
Medium	Master Protein	H3BS09	Ubiquitin carboxyl-terminal hydrolase CYLD OS=Homo sapiens OX=9606 GN=CYLD PE=1 SV=1	0.011	FALSE	2.067	1	1	1	1	771	87.3	5.66	0	1	cell-cell signaling;protein metabolism;other metabolic processes;stress response;signal transduction	plasma membrane;other membranes;cytoskeleton;other cell component	other molecular function	Pf00443, Pf01302, Pf16607		ENSG00000083799	CYLD	H3BS09		Regulation of toll-like receptor signaling pathway; Novel intracellular components of RIG-I-like receptor (RLR) pathway; Cytosolic DNA-sensing pathway	3	0
High	Master Protein	G3V1B2	Solute carrier family 39 (Zinc transporter), member 13, isoform CRA_a OS=Homo sapiens OX=9606 GN=SLC39A13 PE=1 SV=1	0	FALSE	7.553	11	2	2	2	325	34	7.87	5.64	2	transport	other membranes	transporter activity	Pf02535		ENSG00000165915	SLC39A13	G3V1B2		Nuclear receptors meta-pathway; NRF2 pathway	2	0
High	Master Protein	A0A1W2PRA1	Stromal interaction molecule 2 OS=Homo sapiens OX=9606 GN=STIM2 PE=1 SV=1	0	FALSE	41.273	20	11	20	10	754	84.8	6.76	51.86	11	transport;other biological processes	plasma membrane;other membranes;ER/Golgi	other molecular function	Pf07647, Pf16533	57620	ENSG00000109689	STIM2	H0Y860		Calcium regulation in cardiac cells	1	0	0.93	0.887	0.812	1.119	0.958	1.051	0.927	0.903	0.679	0.875	0.837	0.942	0.877	0.899	0.903	0.954	0.873	1.203	1.031	1.13	0.997	0.971
High	Master Protein	A0A2R8Y761	Ribonuclease H2 subunit B OS=Homo sapiens OX=9606 GN=RNASEH2B PE=1 SV=1	0	FALSE	15.286	24	6	8	6	289	32.8	8.02	14.91	6		nucleus;other cell component		Pf09468, Pf17745		ENSG00000136104	RNASEH2B	A0A2R8Y761			0	0	0.935	1.015	1.081	0.63	0.864	0.789	0.754	1.3	1.023	1.262	1.531	1.017	0.905	0.994	0.951	1.085	1.156	0.674	0.924	0.844	0.806	1.39
High	Master Protein	Q16342	Programmed cell death protein 2 OS=Homo sapiens OX=9606 GN=PDCD2 PE=1 SV=2	0	FALSE	12.72	11	2	4	2	344	38.6	5.38	12.88	2	other biological processes	nucleus;other cell component	nucleic acid binding activity;other molecular function	Pf01753, Pf04194	5134	ENSG00000071994	PDCD2	E9PCU7; F5GYS7; hsa:5134; Q16342; Q58HM9; Q58HN0; Q9UH12			0	0	1.401	1.034	1.031	1.161	0.773	0.699	0.959	1.34	1.146	1.536	1.322	1.246	1.626	1.055	1.033	0.738	0.736	0.829	0.552	0.499	0.684	0.956
High	Master Protein	Q16836	Hydroxyacyl-coenzyme A dehydrogenase, mitochondrial OS=Homo sapiens OX=9606 GN=HADH PE=1 SV=3	0	FALSE	41.501	38	10	22	10	314	34.3	8.85	52.89	10	other metabolic processes;other biological processes	mitochondrion;nucleus;other cell component	other molecular function	Pf00725, Pf02737	3033	ENSG00000138796	HADH	hsa:3033; J3KQ17; O00324; O00397; O00753; Q16836; Q4W5B4	Beta oxidation of decanoyl-CoA to octanoyl-CoA-CoA; Beta oxidation of octanoyl-CoA to hexanoyl-CoA; Beta oxidation of hexanoyl-CoA to butanoyl-CoA; Beta oxidation of butanoyl-CoA to acetyl-CoA; Beta oxidation of lauroyl-CoA to decanoyl-CoA-CoA	Fatty acid beta-oxidation; Fatty acid biosynthesis; Mitochondrial long chain fatty acid beta-oxidation; Amino acid metabolism; Tryptophan metabolism; IL-18 signaling pathway	11	0	0.773	0.912	0.816	1.346	1.245	1.304	1.33	0.423	0.51	0.505	0.478	0.626	0.753	0.678	0.779	1.179	1.056	1.741	1.61	1.686	1.72	0.547
High	Master Protein	E9PIN5	Tumor protein p53-inducible protein 11 (Fragment) OS=Homo sapiens OX=9606 GN=TP53I11 PE=1 SV=1	0	FALSE	11.864	20	2	5	2	123	13.3	6.52	23.34	2		other membranes		Pf14936		ENSG00000175274	TP53I11	E9PIN5			0	0	1.046	0.881	1.236	0.611	0.866	0.789	0.707	0.576	0.614	0.581	0.577	0.605	0.656	0.607	0.705	0.843	1.182	0.585	0.829	0.754	0.676	0.55
High	Master Protein	B7XGB9	Protein phosphatase 1M OS=Homo sapiens OX=9606 GN=PPM1M PE=1 SV=1	0.002	FALSE	3.317	3	1	1	1	459	51.1	5.82	2.04	1	protein metabolism;other metabolic processes		other molecular function	Pf00481	132160	ENSG00000164088	PPM1M	B7XGB9; F8W976			0	0
High	Master Protein	Q5T0F9	Coiled-coil and C2 domain-containing protein 1B OS=Homo sapiens OX=9606 GN=CC2D1B PE=1 SV=1	0	FALSE	10.698	8	3	4	3	858	94.2	5.26	13.13	3	cell cycle OR cell proliferation;cell organization and biogenesis;other biological processes	nucleus;other cell component	nucleic acid binding activity;other molecular function	Pf00168	200014	ENSG00000154222	CC2D1B	hsa:200014; Q49AE8; Q5T0F8; Q5T0F9; Q5T0G0; Q6ZNQ1; Q96AP3; Q96I04; Q96JJ1	Sealing of the nuclear envelope (NE) by ESCRT-III		1	0
High	Master Protein	Q96F24	Nuclear receptor-binding factor 2 OS=Homo sapiens OX=9606 GN=NRBF2 PE=1 SV=1	0	FALSE	13.601	15	4	4	4	287	32.4	5.87	11.3	4	RNA metabolism OR transcription;other metabolic processes;stress response;other biological processes	other membranes;nucleus;other cytoplasmic organelle;other cell component		Pf08961, Pf17169	29982	ENSG00000148572	NRBF2	A6PW36; B4DWS0; hsa:29982; Q86UR2; Q96F24; Q96NP6; Q9H0S9; Q9H2I2		Alzheimer's disease and miRNA effects; Alzheimer's disease	2	0
High	Master Protein	Q9NYZ3	G2 and S phase-expressed protein 1 OS=Homo sapiens OX=9606 GN=GTSE1 PE=1 SV=3	0	FALSE	6.707	3	2	4	2	720	76.6	9.39	5.69	2	cell cycle OR cell proliferation;stress response;signal transduction;other biological processes	cytosol;cytoskeleton;nucleus	cytoskeletal activity	Pf15259	51512	ENSG00000075218	GTSE1	B0QYM3; hsa:51512; Q20WK2; Q53GX5; Q5R3I6; Q6DHX4; Q9BRE0; Q9NYZ3; Q9UGZ9; Q9Y557	G2/M Checkpoints; The role of GTSE1 in G2/M progression after G2 checkpoint		2	0
High	Master Protein	Q06278	Aldehyde oxidase OS=Homo sapiens OX=9606 GN=AOX1 PE=1 SV=2	0.006	FALSE	2.305	1	1	1	1	1338	147.8	7.17	0	1	other metabolic processes	cytosol	other molecular function	Pf00111, Pf00941, Pf01315, Pf01799, Pf02738, Pf03450	316	ENSG00000138356	AOX1	hsa:316; O14765; Q06278; Q53RR8; Q53TV3; Q9BYF0; Q9UPG6	Vitamins B6 activation to pyridoxal phosphate	Nicotine metabolism in liver cells; Effects of nitric oxide; Tryptophan metabolism	4	0
Medium	Master Protein	A0A3B3IS67	Tissue factor pathway inhibitor OS=Homo sapiens OX=9606 GN=TFPI2 PE=1 SV=1	0.016	FALSE	1.844	3	1	1	1	241	27.7	8.51	0	1	stress response;other biological processes	non-structural extracellular	enzyme regulator activity	Pf00014		ENSG00000105825	TFPI2	A0A3B3IS67			0	0	1.068	1.083	1.191	1.312	1.659	1.571	2.019	0.717	0.646	0.493	0.826	1.204	1.456	1.425	1.957	1.014	1.115	1.229	1.553	1.471	1.891	0.672
High	Master Protein	Q7Z2W9	39S ribosomal protein L21, mitochondrial OS=Homo sapiens OX=9606 GN=MRPL21 PE=1 SV=2	0	FALSE	21.384	33	6	18	6	205	22.8	9.89	41.09	6	cell organization and biogenesis;protein metabolism;other metabolic processes	other membranes;mitochondrion;translational apparatus	other molecular function	Pf00829	219927	ENSG00000197345	MRPL21	A6NKU0; C9JPR2; hsa:219927; Q7Z2W9	Mitochondrial translation initiation; Mitochondrial translation elongation; Mitochondrial translation termination		3	0	0.792	0.985	0.61	1.406	1.241	1.24	1.369	0.669	0.942	0.783	0.843	0.752	0.925	0.676	0.896	1.244	0.77	1.776	1.567	1.566	1.728	0.845
High	Master Protein	F5H1N7	Capping protein-inhibiting regulator of actin dynamics OS=Homo sapiens OX=9606 GN=CRACD PE=1 SV=1	0.006	FALSE	2.271	2	1	1	1	1226	136.3	5.88	2.31	1				Pf15262		ENSG00000109265	CRACD	F5H1N7			0	0
High	Master Protein	Q5HYK3	2-methoxy-6-polyprenyl-1,4-benzoquinol methylase, mitochondrial OS=Homo sapiens OX=9606 GN=COQ5 PE=1 SV=2	0	FALSE	29.668	27	7	14	6	327	37.1	6.95	33.48	7	other metabolic processes	other membranes;mitochondrion;other cell component	other molecular function	Pf01209	84274	ENSG00000110871	COQ5	B2RDU9; B3GK62; B4DEJ4; hsa:84274; Q32Q28; Q53HH0; Q5HYK3; Q96LV1; Q9BSP8	Ubiquinol biosynthesis		1	0	0.913	0.942	0.672	1.291	1.028	1.193	1.308	0.608	0.662	0.675	0.684	0.845	0.99	0.781	0.984	1.032	0.736	1.414	1.126	1.306	1.433	0.666
High	Master Protein	Q2M296	Methenyltetrahydrofolate synthase domain-containing protein OS=Homo sapiens OX=9606 GN=MTHFSD PE=1 SV=2	0.003	FALSE	2.795	6	1	1	1	383	42.1	8.73	3.03	1		other cell component		Pf00076, Pf01812	64779	ENSG00000103248	MTHFSD	A8MQ77; B7ZLC0; B7ZLC2; D3DUM9; E9PAM1; hsa:64779; Q2M296; Q9H878; Q9H954			0	0
High	Master Protein	Q9NVI1	Fanconi anemia group I protein OS=Homo sapiens OX=9606 GN=FANCI PE=1 SV=4	0	FALSE	37.238	10	11	13	11	1328	149.2	6.74	33.62	11	cell cycle OR cell proliferation;DNA metabolism;other metabolic processes;stress response;other biological processes	cytosol;nucleus;other cell component	nucleic acid binding activity;other molecular function	Pf14674, Pf14675, Pf14676, Pf14677, Pf14678, Pf14679, Pf14680	55215	ENSG00000140525	FANCI	A4ZVE4; A5YMH4; A6NJZ0; hsa:55215; Q96JN1; Q96ST0; Q9BT96; Q9NVI1	TP53 Regulates Transcription of DNA Repair Genes; Fanconi Anemia Pathway	Gastric cancer network 2; DNA repair pathways, full network	4	0	1.269	1.205	1.21	0.721	0.595	0.56	0.622	1.325	1.125	1.174	1.246	1.361	1.176	1.163	1.168	0.949	0.954	0.568	0.469	0.441	0.49	1.044
High	Master Protein	Q9NXD2	Myotubularin-related protein 10 OS=Homo sapiens OX=9606 GN=MTMR10 PE=1 SV=3	0	FALSE	8.783	5	2	4	2	777	88.2	8.53	9.21	2	other metabolic processes	cytosol;other cell component	other molecular function	Pf06602, Pf12578	54893	ENSG00000166912; ENSG00000277086	MTMR10	hsa:54893; Q6P4Q6; Q9NXD2	Synthesis of PIPs at the early endosome membrane	15q13.3 copy number variation syndrome	2	0
High	Master Protein	Q92733	Proline-rich protein PRCC OS=Homo sapiens OX=9606 GN=PRCC PE=1 SV=1	0	FALSE	8.742	5	2	3	2	491	52.4	5.1	9.76	2	cell cycle OR cell proliferation;RNA metabolism OR transcription;other metabolic processes;other biological processes	nucleus		Pf10253	5546	ENSG00000143294	PRCC	A8K1F7; hsa:5546; O00665; O00724; Q5SZ06; Q92733	mRNA Splicing - Major Pathway	Type 2 papillary renal cell carcinoma; IL-18 signaling pathway	3	0	0.843	1.091	0.982	0.675	0.771	0.642	0.667	0.881	0.738	0.602	0.881	0.778	0.599	0.588	0.631	1.294	1.165	0.801	0.915	0.761	0.791	1.045
High	Master Protein	J3QRG5	Cytochrome b-245 chaperone 1 OS=Homo sapiens OX=9606 GN=CYBC1 PE=1 SV=1	0	FALSE	5.458	12	1	1	1	148	16.7	9.54	3.75	1		other membranes;ER/Golgi		Pf15169		ENSG00000178927	CYBC1	J3QRG5			0	0	1.041	1.082	1.075	0.804	0.98	1.41	1.116	0.684	0.452	0.491	0.686	0.741	1.173	1.048	0.985	1.039	1.032	0.772	0.941	1.354	1.071	0.657
High	Master Protein	F5H5T6	Uncharacterized protein (Fragment) OS=Homo sapiens OX=9606 PE=3 SV=1	0	FALSE	11.021	28	5	9	5	163	18.7	8.15	21.97	5	protein metabolism;other metabolic processes	mitochondrion		Pf03937							0	0	0.711	0.905	0.844	1.663	1.717	1.972	1.828	0.988	1.339	1.52	1.317	1.873	2.456	1.988	2.632	1.273	1.186	2.338	2.416	2.774	2.571	1.389
High	Master Protein	E9PMH5	Baculoviral IAP repeat-containing protein 2 OS=Homo sapiens OX=9606 GN=BIRC2 PE=1 SV=1	0	FALSE	19.517	12	6	7	6	597	67.5	6.32	20.39	6	other biological processes	nucleus;other cell component	other molecular function	Pf00619, Pf00653, Pf13920		ENSG00000110330	BIRC2	E9PMH5		Nuclear receptors meta-pathway; Small cell lung cancer; Head and neck squamous cell carcinoma	3	0	1.391	1.189	0.98	1.539	1.095	1.136	1.554	1.797	1.772	1.954	1.708	1.955	1.586	1.527	1.567	0.855	0.705	1.106	0.787	0.817	1.117	1.292
High	Master Protein	P13473	Lysosome-associated membrane glycoprotein 2 OS=Homo sapiens OX=9606 GN=LAMP2 PE=1 SV=2	0	FALSE	19.247	12	4	11	2	410	44.9	5.63	25.77	4	cell organization and biogenesis;protein metabolism;other metabolic processes;stress response;transport;other biological processes	non-structural extracellular;plasma membrane;other membranes;ER/Golgi;other cytoplasmic organelle;other cell component	other molecular function	Pf01299	3920	ENSG00000005893	LAMP2	A8K4X5; D3DTF0; hsa:3920; P13473; Q16641; Q6Q3G8; Q96J30; Q99534; Q9UD93	Neutrophil degranulation; Platelet degranulation ; Chaperone Mediated Autophagy	Senescence and autophagy in cancer	4	1	0.891	0.848	0.959	1.213	1.319	1.276	1.371	0.761	0.783	0.738	0.773	1.008	1.151	1.179	1.187	0.951	1.076	1.361	1.48	1.432	1.538	0.854
High	Master Protein	P39023	60S ribosomal protein L3 OS=Homo sapiens OX=9606 GN=RPL3 PE=1 SV=2	0	FALSE	104.065	52	19	64	19	403	46.1	10.18	132.69	19	cell organization and biogenesis;protein metabolism;RNA metabolism OR transcription;other metabolic processes;transport;other biological processes	cytosol;translational apparatus;nucleus;other cell component	nucleic acid binding activity;other molecular function	Pf00297	6122	ENSG00000100316	RPL3	B2RDV9; hsa:6122; P39023; Q15548; Q5I0G0	Regulation of expression of SLITs and ROBOs; L13a-mediated translational silencing of Ceruloplasmin expression; Formation of a pool of free 40S subunits; GTP hydrolysis and joining of the 60S ribosomal subunit; Major pathway of rRNA processing in the nucleolus and cytosol; Nonsense Mediated Decay (NMD) enhanced by the Exon Junction Complex (EJC); SRP-dependent cotranslational protein targeting to…	Cytoplasmic ribosomal proteins	14	0	1.045	1.012	0.807	1.054	0.888	0.84	0.981	0.703	0.688	0.638	0.67	0.954	0.805	0.882	0.849	0.968	0.772	1.008	0.849	0.804	0.939	0.673
High	Master Protein	Q96NW7	Leucine-rich repeat-containing protein 7 OS=Homo sapiens OX=9606 GN=LRRC7 PE=1 SV=1	0	FALSE	8.205	2	2	3	1	1537	172.5	6.81	8.45	2	cell adhesion;transport;signal transduction;other biological processes	non-structural extracellular;plasma membrane;other membranes;cytosol;cytoskeleton;nucleus;other cell component		Pf00595, Pf13855			LRRC7	Q5VXC2; Q5VXC3; Q68D07; Q86VE8; Q8WX20; Q96NW7; Q9P2I2	Neutrophil degranulation; RAF/MAP kinase cascade; Assembly and cell surface presentation of NMDA receptors; Ras activation upon Ca2+ influx through NMDA receptor; Unblocking of NMDA receptors, glutamate binding and activation; Negative regulation of NMDA receptor-mediated neuronal transmission; Long-term potentiation		7	0
High	Master Protein	H9KVA9	Lys-63-specific deubiquitinase BRCC36 OS=Homo sapiens OX=9606 GN=BRCC3 PE=1 SV=2	0	FALSE	10.735	16	4	5	4	317	36.2	6	13.41	4	cell cycle OR cell proliferation;protein metabolism;DNA metabolism;other metabolic processes;stress response;signal transduction;other biological processes	cytoskeleton;nucleus;other cell component	other molecular function	Pf01398, Pf18110		ENSG00000185515	BRCC3	H9KVA9			0	0	1.212	1.51	1.281	0.752	1.7	1.337	1.56	1.777	1.547	0.995	1.778	1.111	1.242	1.131	1.175	1.246	1.057	0.62	1.402	1.103	1.287	1.465
High	Master Protein	Q8TBZ3	WD repeat-containing protein 20 OS=Homo sapiens OX=9606 GN=WDR20 PE=1 SV=2	0	FALSE	23.938	14	8	12	8	569	62.9	8	21.42	8	protein metabolism;other metabolic processes	nucleus		Pf00400	91833	ENSG00000140153	WDR20	B4DN18; E7EUY8; F8W9S4; G3V2F8; G3V5R0; H0YJJ1; hsa:91833; Q86TU2; Q8NCN7; Q8TBZ3; Q8WXX2; Q9UF86	Ub-specific processing proteases		1	0	0.976	0.934	0.751	1.512	1.132	1.299	1.138	1.159	1.105	1.324	1.122	1.171	1.264	1.212	1.196	0.957	0.77	1.549	1.16	1.331	1.166	1.188
Medium	Master Protein	H3BRF6	bMERB domain-containing protein 1 (Fragment) OS=Homo sapiens OX=9606 GN=BMERB1 PE=1 SV=1	0.04	FALSE	1.34	7	1	1	1	175	20.2	5.55	2.77	1				Pf12130		ENSG00000166780; ENSG00000278823	BMERB1	H3BRF6			0	0
High	Master Protein	Q9H4E7	Differentially expressed in FDCP 6 homolog OS=Homo sapiens OX=9606 GN=DEF6 PE=1 SV=1	0	FALSE	38.452	17	9	18	7	631	73.9	6.05	53.71	9		plasma membrane;other membranes;cytosol;cytoskeleton;nucleus;other cell component		Pf00169	50619	ENSG00000023892	DEF6	hsa:50619; Q86VF4; Q9H4E7	RHOA GTPase cycle; CDC42 GTPase cycle; RAC1 GTPase cycle; RAC2 GTPase cycle		4	2	1.049	1.082	0.927	0.909	1.116	0.994	1.051	1.765	1.911	1.832	1.829	1.85	1.6	1.912	1.596	1.032	0.884	0.867	1.064	0.948	1.002	1.684
High	Master Protein	Q86VY4	Testis-specific Y-encoded-like protein 5 OS=Homo sapiens OX=9606 GN=TSPYL5 PE=1 SV=2	0	FALSE	6.196	4	1	1	1	417	45.1	9.54	3.14	1	cell organization and biogenesis;other biological processes	nucleus;other cell component	other molecular function	Pf00956	85453	ENSG00000180543	TSPYL5	B3KRF0; hsa:85453; Q86VY4; Q9C0B3			0	0	1.381	1	0.851	0.617	0.558	0.752	0.797	0.81	0.782	0.6	0.707	0.86	0.637	0.606	0.645	0.724	0.616	0.447	0.404	0.545	0.577	0.587
High	Master Protein	A0A024QZ33	Coiled-coil domain containing 55, isoform CRA_a OS=Homo sapiens OX=9606 GN=NSRP1 PE=1 SV=1	0	FALSE	13.899	9	4	6	4	504	60.4	8.94	17.57	4		nucleus		Pf09745	84081	ENSG00000126653	NSRP1	A0A024QZ33			0	0	0.773	0.92	0.855	0.973	0.569	0.637	0.719	1.184	1.114	1.038	1.304	0.99	0.989	0.706	0.887	1.191	1.106	1.259	0.736	0.824	0.93	1.532
High	Master Protein	P52943	Cysteine-rich protein 2 OS=Homo sapiens OX=9606 GN=CRIP2 PE=1 SV=1	0	FALSE	15.49	36	4	7	4	208	22.5	8.72	22.5	4	developmental processes;other biological processes	other cell component	other molecular function	Pf00412	1397	ENSG00000182809	CRIP2	A1A4U1; B7Z6C0; E9PD13; hsa:1397; P52943		VEGFA-VEGFR2 signaling pathway	1	0	1.008	0.982	1.465	1.829	1.423	1.416	1.195	1.504	1.586	1.497	1.497	1.377	1.354	1.635	1.181	0.974	1.453	1.814	1.412	1.404	1.186	1.491
High	Master Protein	X6RLX0	ELKS/Rab6-interacting/CAST family member 1 OS=Homo sapiens OX=9606 GN=ERC1 PE=1 SV=1	0	FALSE	99.804	31	30	67	30	1120	128.4	5.97	183.22	30		other membranes;other cell component		Pf09457, Pf10174	23085	ENSG00000082805	ERC1	X6RLX0			0	0	1.069	1.103	1.184	1.393	1.297	1.231	1.309	1.818	1.843	1.941	1.813	1.706	1.669	1.74	1.61	1.032	1.107	1.302	1.213	1.151	1.224	1.7
High	Master Protein	Q15642	Cdc42-interacting protein 4 OS=Homo sapiens OX=9606 GN=TRIP10 PE=1 SV=3	0	FALSE	88.336	43	19	42	1	601	68.3	5.73	121.43	19	cell organization and biogenesis;transport;signal transduction;other biological processes	plasma membrane;cytosol;cytoskeleton;ER/Golgi;nucleus;other cytoplasmic organelle;other cell component	other molecular function	Pf00018, Pf00611	9322	ENSG00000125733	TRIP10	B2R8A6; B7WP22; D6W645; hsa:9322; O15184; Q15642; Q53G22; Q5TZN1; Q6FI24; Q8NFL1; Q8TCY1; Q8TDX3; Q96RJ1	RHOQ GTPase cycle; Clathrin-mediated endocytosis	Angiopoietin-like protein 8 regulatory pathway	3	12	1.023	1.129	1.055	0.915	1.068	1.04	1.013	1.858	1.856	1.972	1.944	1.603	1.667	1.813	1.546	1.103	1.031	0.895	1.045	1.016	0.99	1.817
High	Master Protein	Q14114	Low-density lipoprotein receptor-related protein 8 OS=Homo sapiens OX=9606 GN=LRP8 PE=1 SV=4	0	FALSE	31.833	10	7	11	7	963	105.6	5.05	23.79	7	cell-cell signaling;cell organization and biogenesis;protein metabolism;other metabolic processes;transport;developmental processes;signal transduction;other biological processes	non-structural extracellular;plasma membrane;other membranes;cytoskeleton;other cell component	cytoskeletal activity;other molecular function	Pf00057, Pf00058, Pf14670	7804	ENSG00000157193	LRP8	B1AMT6; B1AMT7; B1AMT8; hsa:7804; O14968; Q14114; Q86V27; Q99876; Q9BR78	Platelet sensitization by LDL; Retinoid metabolism and transport		2	0	1.036	1.005	1.298	0.554	0.696	0.632	0.675	0.326	0.349	0.37	0.329	0.435	0.367	0.444	0.405	0.97	1.252	0.534	0.672	0.61	0.652	0.314
High	Master Protein	Q9HB66	Alternative protein MKKS OS=Homo sapiens OX=9606 GN=MKKS PE=1 SV=1	0	FALSE	5.419	27	1	2	1	63	7.3	9.61	7.16	1		other membranes				ENSG00000285723	MKKS	Q9HB66			0	0	1.024	1.137	0.949	1.195	1.239	1.048	1.304	1.001	1.047	1.102	1.083	0.863	0.924	0.809	1.14	1.11	0.926	1.167	1.209	1.023	1.273	0.977
High	Master Protein	P29692	Elongation factor 1-delta OS=Homo sapiens OX=9606 GN=EEF1D PE=1 SV=5	0	FALSE	91.478	72	15	45	6	281	31.1	5.01	125.23	15	protein metabolism;RNA metabolism OR transcription;other metabolic processes;other biological processes	cytosol;nucleus;other cell component	enzyme regulator activity;nucleic acid binding activity;other molecular function	Pf00736, Pf10587	1936	ENSG00000104529; ENSG00000273594	EEF1D	B4DDU4; D3DWK3; E9PBQ9; hsa:1936; P29692; Q4VBZ6; Q969J1; Q96I38	Eukaryotic Translation Elongation	Translation factors	2	6	1.144	1.182	1.231	1.027	0.774	0.696	0.785	0.83	0.711	0.601	0.724	0.954	0.784	0.57	0.805	1.034	1.076	0.898	0.677	0.608	0.686	0.726
Medium	Master Protein	Q6ZMG9	Ceramide synthase 6 OS=Homo sapiens OX=9606 GN=CERS6 PE=1 SV=1	0.016	FALSE	1.835	2	1	1	1	384	44.9	7.65	2.29	1	other metabolic processes;stress response	other membranes;ER/Golgi	nucleic acid binding activity;other molecular function	Pf00046, Pf03798	253782	ENSG00000172292	CERS6	hsa:253782; Q32M63; Q6ZMG9; Q8N617	Sphingolipid de novo biosynthesis	Sphingolipid pathway; Sphingolipid metabolism overview; Sphingolipid metabolism: integrated pathway	4	0	1.011	1.07	1.043	1	0.884	1.034	0.988	0.735	0.736	0.761	0.762	0.847	0.941	0.756	0.911	1.058	1.031	0.989	0.874	1.022	0.977	0.726
High	Master Protein	F8VWW7	SPRY domain-containing protein 3 OS=Homo sapiens OX=9606 GN=SPRYD3 PE=1 SV=1	0.004	FALSE	2.765	4	1	1	1	479	53.8	6.07	2.5	1				Pf00622		ENSG00000167778	SPRYD3	F8VWW7			0	0
High	Master Protein	H0YNW1	POU domain protein OS=Homo sapiens OX=9606 GN=POU2F2 PE=1 SV=1	0	FALSE	10.85	10	3	4	1	424	45.5	8.82	11.41	3	other biological processes	nucleus;other cell component	nucleic acid binding activity;other molecular function	Pf00046, Pf00157		ENSG00000028277	POU2F2	H0YNW1		Ectoderm differentiation; Prion disease pathway; Sudden infant death syndrome (SIDS) susceptibility pathways	3	0
High	Master Protein	A0PJW6	Transmembrane protein 223 OS=Homo sapiens OX=9606 GN=TMEM223 PE=1 SV=1	0	FALSE	11.861	18	4	5	4	202	22	11.02	13.08	4	developmental processes	other membranes		Pf06979	79064	ENSG00000168569	TMEM223	A0PJW6; hsa:79064; Q504S0; Q86YD4; Q8WUC5; Q96HG0			0	0	0.997	0.981	0.65	0.823	0.758	1.227	1.011	0.665	0.665	0.516	0.631	1.325	1.088	1.309	1.061	0.984	0.652	0.826	0.76	1.231	1.014	0.667
High	Master Protein	Q96S66	Chloride channel CLIC-like protein 1 OS=Homo sapiens OX=9606 GN=CLCC1 PE=1 SV=1	0	FALSE	101.319	44	21	51	21	551	62	5.55	153.26	21	transport	other membranes;ER/Golgi;nucleus;other cell component	transporter activity	Pf05934	23155	ENSG00000121940	CLCC1	hsa:23155; O94861; Q8WYP8; Q8WYP9; Q96S66; Q9BU25			0	0	1.011	0.937	0.947	0.945	0.878	0.846	0.857	0.596	0.575	0.564	0.583	0.774	0.764	0.797	0.836	0.927	0.936	0.934	0.868	0.837	0.847	0.59
High	Master Protein	A8MT19	Putative rhophilin-2-like protein RHPN2P1 OS=Homo sapiens OX=9606 GN=RHPN2P1 PE=5 SV=2	0.001	FALSE	4.236	3	2	2	2	583	65.9	6.98	3.8	2				Pf03097			RHPN2P1	A8MT19			0	0	0.784	0.861	0.805	0.668	0.534	0.6	0.753	1.791	1.592	1.722	1.202	1.149	1.298	1.169	0.862	1.099	1.027	0.853	0.681	0.765	0.961	2.286
High	Master Protein	H0YIQ8	KAT8 regulatory NSL complex subunit 2 (Fragment) OS=Homo sapiens OX=9606 GN=KANSL2 PE=1 SV=1	0	FALSE	8.229	11	3	3	3	340	38.5	8.44	5.6	3		nucleus		Pf13891		ENSG00000139620	KANSL2	H0YIQ8			0	0
High	Master Protein	P05106	Integrin beta-3 OS=Homo sapiens OX=9606 GN=ITGB3 PE=1 SV=2	0	FALSE	79.844	29	17	37	17	788	87	5.24	90.42	17	cell adhesion;cell organization and biogenesis;stress response;transport;developmental processes;signal transduction;other biological processes	plasma membrane;other membranes;nucleus;other cell component	signal transduction activity or receptor binding;other molecular function	Pf00362, Pf07965, Pf07974, Pf08725, Pf17205, Pf18372	3690	ENSG00000259207	ITGB3	A0PJW2; D3DXJ8; hsa:3690; O15495; P05106; Q12806; Q13413; Q14648; Q16499	VEGFA-VEGFR2 Pathway; Platelet degranulation ; Integrin cell surface interactions; ECM proteoglycans; Signaling by BRAF and RAF1 fusions; Signal transduction by L1; Syndecan interactions; Signaling by moderate kinase activity BRAF mutants; Paradoxical activation of RAF signaling by kinase inactive BRAF; Signaling downstream of RAS mutants; Signaling by RAF1 mutants; Molecules associated with elas…	Osteoclast signaling; Osteopontin signaling; Serotonin transporter activity; Integrin-mediated cell adhesion; Arrhythmogenic right ventricular cardiomyopathy; Primary focal segmental glomerulosclerosis (FSGS); Complement system; Focal adhesion; Osteoblast signaling; MFAP5-mediated ovarian cancer cell motility and invasiveness; TGF-beta signaling pathway; VEGFA-VEGFR2 signaling pathway; Focal adhe…	40	0	0.968	0.977	1.052	0.734	1.574	1.445	1.505	0.386	0.397	0.365	0.355	0.795	0.898	0.894	0.906	1.009	1.086	0.758	1.626	1.492	1.554	0.399
High	Master Protein	Q9ULM3	YEATS domain-containing protein 2 OS=Homo sapiens OX=9606 GN=YEATS2 PE=1 SV=2	0	FALSE	12.219	4	4	7	3	1422	150.7	8.98	15.79	4	protein metabolism;other metabolic processes;other biological processes	cytoskeleton	other molecular function	Pf03366	55689	ENSG00000163872	YEATS2	A7E2B9; D3DNS9; hsa:55689; Q641P6; Q9NW96; Q9ULM3	HATs acetylate histones		1	0
Medium	Master Protein	A0A0A6YYL0	Protein TGIF2-C20orf24 OS=Homo sapiens OX=9606 GN=TGIF2-C20orf24 PE=4 SV=1	0.031	FALSE	1.463	6	1	1	1	155	17.9	4.97	2.47	1	cell organization and biogenesis;other biological processes	other membranes;mitochondrion;nucleus	nucleic acid binding activity	Pf05920, Pf07019	100527943	ENSG00000259399	TGIF2-C20orf24	A0A0A6YYL0; hsa:100527943			0	0
High	Master Protein	Q92621	Nuclear pore complex protein Nup205 OS=Homo sapiens OX=9606 GN=NUP205 PE=1 SV=3	0	FALSE	160.949	26	41	79	41	2012	227.8	6.19	213.02	41	cell cycle OR cell proliferation;cell organization and biogenesis;protein metabolism;other metabolic processes;transport;other biological processes	other membranes;cytosol;nucleus;other cell component	other molecular function	Pf11894	23165	ENSG00000155561	NUP205	A6H8X3; hsa:23165; Q86YC1; Q92621	Rev-mediated nuclear export of HIV RNA; Nuclear import of Rev protein; Postmitotic nuclear pore complex (NPC) reformation; SUMOylation of DNA damage response and repair proteins; HCMV Late Events; HCMV Early Events; ISG15 antiviral mechanism; Transport of the SLBP independent Mature mRNA; Transport of the SLBP Dependant Mature mRNA; Transport of Mature mRNA Derived from an Intronless Transcript; …		28	0	1.088	1.063	1.546	0.892	1.085	1.181	1.098	1.536	1.436	1.46	1.446	1.766	1.597	1.536	1.843	0.977	1.42	0.82	0.997	1.085	1.009	1.412
High	Master Protein	P53365	Arfaptin-2 OS=Homo sapiens OX=9606 GN=ARFIP2 PE=1 SV=1	0	FALSE	58.832	59	12	24	10	341	37.8	6.04	66.06	12	cell organization and biogenesis;other metabolic processes;transport;signal transduction	plasma membrane;other membranes;cytosol;ER/Golgi;other cell component	other molecular function	Pf06456	23647	ENSG00000132254	ARFIP2	B4DX86; B4E306; D3DQT5; hsa:23647; P53365	Retrograde transport at the Trans-Golgi-Network		1	0	1.086	1.128	0.974	0.94	0.914	0.992	0.941	1.243	1.317	1.479	1.246	1.032	1.246	1.124	1.039	1.038	0.897	0.865	0.842	0.913	0.867	1.144
High	Master Protein	P28838	Cytosol aminopeptidase OS=Homo sapiens OX=9606 GN=LAP3 PE=1 SV=3	0	FALSE	110.551	50	22	45	22	519	56.1	7.93	140.69	22	protein metabolism	cytosol;ER/Golgi;nucleus;other cell component	other molecular function	Pf00883, Pf02789	51056	ENSG00000002549	LAP3	B3KMQ3; hsa:51056; P28838; Q6IAM6; Q6P0L6; Q9UQE3			0	0	0.77	0.929	0.731	1.027	1.139	1.237	1.267	0.763	0.955	0.851	0.827	0.786	1.026	0.857	1.016	1.207	0.95	1.334	1.48	1.608	1.647	0.992
High	Master Protein	D6REW7	E3 ubiquitin-protein transferase MAEA (Fragment) OS=Homo sapiens OX=9606 GN=MAEA PE=1 SV=1	0.005	FALSE	2.521	6	1	1	1	274	30.4	8.97	2.67	1	developmental processes;other biological processes	nucleus	cytoskeletal activity			ENSG00000090316	MAEA	D6REW7		Ciliary landscape	1	0
High	Master Protein	E7ESC6	Exportin-7 OS=Homo sapiens OX=9606 GN=XPO7 PE=1 SV=1	0	FALSE	60.709	18	16	29	16	1088	124	6.48	76.2	16	transport	nucleus;other cell component	other molecular function	Pf03810		ENSG00000130227	XPO7	E7ESC6			0	0	1.229	1.197	0.996	0.656	0.811	0.827	0.861	2.173	1.712	2.172	2.099	1.804	1.29	1.692	1.235	0.974	0.81	0.534	0.661	0.673	0.701	1.768
High	Master Protein	Q06124	Tyrosine-protein phosphatase non-receptor type 11 OS=Homo sapiens OX=9606 GN=PTPN11 PE=1 SV=3	0	FALSE	74.573	42	21	47	20	593	68	7.3	124.63	21	cell cycle OR cell proliferation;cell organization and biogenesis;protein metabolism;other metabolic processes;stress response;developmental processes;signal transduction;other biological processes	plasma membrane;other membranes;cytosol;mitochondrion;nucleus;other cell component	signal transduction activity or receptor binding;other molecular function	Pf00017, Pf00102	5781	ENSG00000179295	PTPN11	A8K1D9; hsa:5781; Q06124; Q96HD7	PIP3 activates AKT signaling; GPVI-mediated activation cascade; Constitutive Signaling by Aberrant PI3K in Cancer; PI5P, PP2A and IER3 Regulate PI3K/AKT Signaling; PECAM1 interactions; Platelet sensitization by LDL; CTLA4 inhibitory signaling; Interleukin-3, Interleukin-5 and GM-CSF signaling; PD-1 signaling; Activation of IRF3/IRF7 mediated by TBK1/IKK epsilon; Signal regulatory protein family i…	IL-5 signaling pathway; Heart development; IL-1 signaling pathway; Leptin signaling pathway; Prolactin signaling pathway; Thymic stromal lymphopoietin (TSLP) signaling pathway; Pilocytic astrocytoma; B cell receptor signaling pathway; Interleukin-11 signaling pathway; Oncostatin M signaling pathway; Brain-derived neurotrophic factor (BDNF) signaling pathway; Alpha 6 beta 4 signaling pathway; IL-3…	85	1	1.155	1.013	0.965	0.869	0.906	0.95	0.936	1.532	1.501	1.506	1.485	1.216	1.233	1.101	1.057	0.877	0.836	0.753	0.785	0.823	0.81	1.326
High	Master Protein	P38606	V-type proton ATPase catalytic subunit A OS=Homo sapiens OX=9606 GN=ATP6V1A PE=1 SV=2	0	FALSE	99.819	45	20	53	20	617	68.3	5.52	150.25	20	cell organization and biogenesis;other metabolic processes;stress response;transport;signal transduction;other biological processes	plasma membrane;other membranes;cytosol;nucleus;other cell component	transporter activity;other molecular function	Pf00006, Pf02874, Pf16886	523	ENSG00000114573	ATP6V1A	B2RBR8; B7Z1R5; D3DN75; hsa:523; P38606; Q53YD9; Q96DY6; Q9UHY3	Amino acids regulate mTORC1; ROS and RNS production in phagocytes; Insulin receptor recycling; Transferrin endocytosis and recycling; Ion channel transport	Proximal tubule transport	6	0	0.97	0.954	1.082	0.773	1	0.948	0.921	0.94	0.983	1.004	0.955	1.069	1.018	1.072	0.987	0.984	1.115	0.798	1.031	0.978	0.95	0.969
High	Master Protein	Q9NY12	H/ACA ribonucleoprotein complex subunit 1 OS=Homo sapiens OX=9606 GN=GAR1 PE=1 SV=1	0	FALSE	9.117	15	4	5	4	217	22.3	10.92	11.59	4	cell organization and biogenesis;DNA metabolism;RNA metabolism OR transcription;other metabolic processes	nucleus	nucleic acid binding activity	Pf04410	54433	ENSG00000109534	GAR1	hsa:54433; Q5MJQ2; Q9NY12	rRNA modification in the nucleus and cytosol; Telomere Extension By Telomerase		2	0	1.367	1.166	1.373	0.634	0.87	0.789	0.863	1.368	1.061	1.458	1.317	1.458	1.307	1.414	1.487	0.853	1.004	0.464	0.637	0.577	0.631	1
High	Master Protein	Q7Z7L7	Protein zer-1 homolog OS=Homo sapiens OX=9606 GN=ZER1 PE=1 SV=1	0.001	FALSE	4.23	1	1	1	1	766	88.1	5.62	2.29	1	protein metabolism;other metabolic processes;other biological processes	other cell component			10444	ENSG00000160445	ZER1	hsa:10444; O00156; Q5T272; Q5T273; Q7Z7L7			0	0
High	Master Protein	Q9UI42	Carboxypeptidase A4 OS=Homo sapiens OX=9606 GN=CPA4 PE=1 SV=2	0.001	FALSE	4.337	8	1	2	1	421	47.3	6.7	6.67	1	protein metabolism;other metabolic processes	non-structural extracellular	other molecular function	Pf00246, Pf02244	51200	ENSG00000128510	CPA4	B7Z576; hsa:51200; Q86UY9; Q9UI42			0	0
High	Master Protein	A0A087WUS1	MAGUK p55 subfamily member 4 OS=Homo sapiens OX=9606 GN=MPP4 PE=1 SV=1	0.001	FALSE	4.414	3	1	1	1	606	69.2	6.65	3.89	1		cytosol;cytoskeleton		Pf00595, Pf00625, Pf02828	58538	ENSG00000082126	MPP4	A0A087WUS1			0	0
High	Master Protein	Q71UI9	Histone H2A.V OS=Homo sapiens OX=9606 GN=H2AFV PE=1 SV=3	0	FALSE	23.916	48	4	11	3	128	13.5	10.58	24.02	4	cell organization and biogenesis	nucleus;other cell component	nucleic acid binding activity;other molecular function	Pf00125, Pf16211	94239	ENSG00000105968	H2AZ2	A6NFA8; A6NKY0; A6NN01; A8MQC5; hsa:94239; Q59GV8; Q6PK98; Q71UI9	Formation of the beta-catenin:TCF transactivating complex; Activation of anterior HOX genes in hindbrain development during early embryogenesis; RUNX1 regulates genes involved in megakaryocyte differentiation and platelet function; Transcriptional regulation by small RNAs; RMTs methylate histone arginines; B-WICH complex positively regulates rRNA expression; NoRC negatively regulates rRNA express…	FBXL10 enhancement of MAP/ERK signaling in diffuse large B-cell lymphoma	34	0	1.519	1.24	1.568	0.995	0.96	0.975	0.962	1.548	1.248	1.488	1.439	1.501	1.054	0.942	1.009	0.816	1.032	0.655	0.632	0.642	0.634	1.019
High	Master Protein	Q12929	Epidermal growth factor receptor kinase substrate 8 OS=Homo sapiens OX=9606 GN=EPS8 PE=1 SV=1	0	FALSE	153.457	47	28	82	28	822	91.8	7.5	241.33	28	cell cycle OR cell proliferation;cell organization and biogenesis;signal transduction;other biological processes	plasma membrane;other membranes;other cell component	cytoskeletal activity;other molecular function	Pf00018, Pf08416, Pf18016	2059	ENSG00000151491	EPS8	A6NMC3; A8K6W2; A8KA66; B4DX66; hsa:2059; Q12929; Q8N6J0	Sensory processing of sound by inner hair cells of the cochlea; Sensory processing of sound by outer hair cells of the cochlea	EGF/EGFR signaling pathway; IL-18 signaling pathway	4	0	1.068	0.993	1.03	1.144	0.997	1.031	1.172	2.427	2.626	2.635	2.399	1.567	1.712	1.638	1.427	0.93	0.964	1.071	0.933	0.965	1.097	2.272
High	Master Protein	Q9NSC2	Sal-like protein 1 OS=Homo sapiens OX=9606 GN=SALL1 PE=1 SV=2	0.002	FALSE	3.046	1	1	1	1	1324	140.3	7.02	2.36	1	developmental processes;other biological processes	nucleus;other cell component	nucleic acid binding activity;other molecular function	Pf00096, Pf12874	6299	ENSG00000103449	SALL1	hsa:6299; Q99881; Q9NSC2; Q9NSC3; Q9P1R0	POU5F1 (OCT4), SOX2, NANOG activate genes related to proliferation	GDNF/RET signaling axis; Development of ureteric collection system	3	0
High	Master Protein	B1AKW3	Eyes absent homolog (Fragment) OS=Homo sapiens OX=9606 GN=EYA2 PE=1 SV=1	0.005	FALSE	2.484	7	1	1	1	197	21.7	6.28	2.08	1	protein metabolism;DNA metabolism;other metabolic processes;stress response;other biological processes		other molecular function			ENSG00000064655	EYA2	B1AKW3			0	0
High	Master Protein	Q8IV38	Ankyrin repeat and MYND domain-containing protein 2 OS=Homo sapiens OX=9606 GN=ANKMY2 PE=1 SV=1	0	FALSE	10.166	8	2	2	2	441	49.3	6.25	8.49	2		other cell component	other molecular function	Pf01753, Pf12796	57037	ENSG00000106524	ANKMY2	A4D124; hsa:57037; Q659G1; Q8IV38; Q96BL3			0	0
High	Master Protein	Q14914	Prostaglandin reductase 1 OS=Homo sapiens OX=9606 GN=PTGR1 PE=1 SV=2	0	FALSE	22.169	24	6	8	6	329	35.8	8.29	22.08	6	other metabolic processes;other biological processes	other cell component	other molecular function	Pf00107, Pf16884	22949	ENSG00000106853	PTGR1	A8K0N2; B4DPK3; F5GY50; hsa:22949; Q14914; Q8IYQ0; Q9H1X6	Synthesis of Leukotrienes (LT) and Eoxins (EX); Synthesis of Lipoxins (LX)	Nuclear receptors meta-pathway; NRF2 pathway; Eicosanoid metabolism via cyclooxygenases (COX); Eicosanoid metabolism via lipooxygenases (LOX)	6	0	1.213	1.129	1.119	0.697	1.03	0.931	1.071	1.794	1.798	1.677	1.935	2.139	2.026	2.225	1.972	0.931	0.922	0.574	0.849	0.767	0.883	1.479
High	Master Protein	L0B3M6	RE1-silencing transcription factor OS=Homo sapiens OX=9606 GN=REST PE=1 SV=1	0	FALSE	5.052	17	2	2	2	307	34.4	6.3	2.61	2						ENSG00000084093	REST	L0B3M6		MECP2 and associated Rett syndrome; Sudden infant death syndrome (SIDS) susceptibility pathways	2	0
High	Master Protein	Q96IW7	Vesicle-trafficking protein SEC22a OS=Homo sapiens OX=9606 GN=SEC22A PE=1 SV=1	0	FALSE	12.298	10	2	3	2	307	34.9	8.24	11.61	2	transport	other membranes;ER/Golgi	transporter activity	Pf13774	26984	ENSG00000121542	SEC22A	B2RE26; hsa:26984; Q96IW7; Q9Y682	COPII-mediated vesicle transport		1	0
High	Master Protein	Q16718	NADH dehydrogenase [ubiquinone] 1 alpha subcomplex subunit 5 OS=Homo sapiens OX=9606 GN=NDUFA5 PE=1 SV=3	0	FALSE	49.173	66	6	23	6	116	13.5	5.99	77.61	6	cell organization and biogenesis;other metabolic processes;transport	other membranes;mitochondrion	transporter activity	Pf04716	4698	ENSG00000128609	NDUFA5	B2RD98; hsa:4698; Q16718; Q5H9R2; Q6IRX7	RHOG GTPase cycle; Complex I biogenesis	Electron transport chain: OXPHOS system in mitochondria; Ciliary landscape; Nonalcoholic fatty liver disease; Oxidative phosphorylation	7	0	0.991	1.092	0.902	1.102	1.273	1.326	1.393	0.864	0.97	0.922	0.984	0.755	0.774	0.831	0.889	1.101	0.91	1.111	1.284	1.338	1.405	0.872
High	Master Protein	A0A2R8YH03	Protein TASOR 2 OS=Homo sapiens OX=9606 GN=TASOR2 PE=1 SV=1	0	FALSE	15	3	5	5	5	2645	293.4	5.95	13.97	5				Pf12480, Pf12509		ENSG00000108021	TASOR2	A0A2R8YH03			0	0
High	Master Protein	P35658	Nuclear pore complex protein Nup214 OS=Homo sapiens OX=9606 GN=NUP214 PE=1 SV=2	0	FALSE	161.918	23	33	70	33	2090	213.5	7.47	204.53	33	cell cycle OR cell proliferation;protein metabolism;other metabolic processes;transport;other biological processes	cytosol;nucleus;other cell component	other molecular function	Pf18617	8021	ENSG00000126883	NUP214	A6NFQ0; hsa:8021; P35658; Q15010; Q3KQZ0; Q5JUP7; Q75R47; Q86XD3	Rev-mediated nuclear export of HIV RNA; Nuclear import of Rev protein; SUMOylation of DNA damage response and repair proteins; HCMV Late Events; HCMV Early Events; ISG15 antiviral mechanism; Transport of the SLBP independent Mature mRNA; Transport of the SLBP Dependant Mature mRNA; Transport of Mature mRNA Derived from an Intronless Transcript; Transport of Mature mRNA derived from an Intron-Cont…	TGF-beta signaling pathway	29	0	1.1	1.002	1.483	1.051	1.204	1.189	1.121	1.586	1.617	1.587	1.688	1.963	1.721	1.781	1.934	0.911	1.348	0.956	1.095	1.081	1.019	1.441
High	Master Protein	Q86VL0	TCEA2 protein OS=Homo sapiens OX=9606 GN=TCEA2 PE=1 SV=1	0.002	FALSE	3.394	4	1	2	1	242	26.6	9.16	4.58	1	protein metabolism;RNA metabolism OR transcription;other metabolic processes	cytoskeleton;nucleus	nucleic acid binding activity	Pf08711		ENSG00000171703	TCEA2	Q86VL0			0	0
High	Master Protein	O15370	Transcription factor SOX-12 OS=Homo sapiens OX=9606 GN=SOX12 PE=2 SV=2	0.001	FALSE	4.264	9	1	2	1	315	34.1	5.16	7.26	1	developmental processes;other biological processes	nucleus;other cell component	nucleic acid binding activity;other molecular function	Pf00505	6666	ENSG00000177732	SOX12	hsa:6666; O15370; Q5D038; Q9NUD4			0	0
High	Master Protein	P18583	Protein SON OS=Homo sapiens OX=9606 GN=SON PE=1 SV=4	0	FALSE	101.582	16	24	43	24	2426	263.7	5.64	127.81	24	cell cycle OR cell proliferation;cell organization and biogenesis;RNA metabolism OR transcription;other metabolic processes;other biological processes	nucleus	nucleic acid binding activity	Pf01585, Pf14709, Pf17069	6651	ENSG00000159140	SON	D3DSF5; D3DSF6; E7ETE8; E7EU67; E7EVW3; E9PFQ2; hsa:6651; O14487; O95981; P18583; Q14120; Q6PKE0; Q9H7B1; Q9P070; Q9P072; Q9UKP9; Q9UPY0			0	0	1.43	1.292	1.592	1.296	1.006	0.881	0.886	1.261	0.999	1.257	1.503	1.409	1.214	1.039	1.559	0.904	1.113	0.906	0.703	0.616	0.62	0.882
High	Master Protein	O14647	Chromodomain-helicase-DNA-binding protein 2 OS=Homo sapiens OX=9606 GN=CHD2 PE=1 SV=2	0	FALSE	12.339	2	3	5	3	1828	211.2	8.1	16.59	3	cell organization and biogenesis;developmental processes;other biological processes	nucleus	nucleic acid binding activity;other molecular function	Pf00176, Pf00271, Pf00385, Pf13907, Pf18375	1106	ENSG00000173575	CHD2	C6G482; hsa:1106; O14647; Q96IP5		Prion disease pathway; Male infertility	2	0
High	Master Protein	O75508	Claudin-11 OS=Homo sapiens OX=9606 GN=CLDN11 PE=1 SV=2	0	FALSE	16.241	14	3	8	3	207	22	7.9	17.37	3	cell adhesion;cell organization and biogenesis;developmental processes;other biological processes	plasma membrane;other membranes;cytoskeleton;other cell component	other molecular function	Pf00822	5010	ENSG00000013297	CLDN11	B2R7C1; D3DNQ5; hsa:5010; O75508; Q5U0P3	Tight junction interactions	Ectoderm differentiation; Epithelial to mesenchymal transition in colorectal cancer	3	0	1.021	0.971	0.668	0.639	0.447	0.521	0.504	0.893	0.878	0.983	0.831	0.964	0.953	0.974	0.844	0.95	0.654	0.625	0.437	0.51	0.494	0.874
High	Master Protein	P35251	Replication factor C subunit 1 OS=Homo sapiens OX=9606 GN=RFC1 PE=1 SV=4	0	FALSE	87.737	22	22	38	22	1148	128.2	9.36	104.56	22	cell cycle OR cell proliferation;cell organization and biogenesis;DNA metabolism;other metabolic processes;stress response;other biological processes	nucleus;other cell component	enzyme regulator activity;nucleic acid binding activity;other molecular function	Pf00004, Pf00533, Pf08519	5981	ENSG00000035928	RFC1	A8K6E7; hsa:5981; P35251; Q5XKF5; Q6PKU0; Q86V41; Q86V46	PCNA-Dependent Long Patch Base Excision Repair; Termination of translesion DNA synthesis; HDR through Homologous Recombination (HRR); Dual incision in TC-NER; Gap-filling DNA repair synthesis and ligation in TC-NER; Translesion synthesis by REV1; Translesion synthesis by POLK; Translesion synthesis by POLI; Recognition of DNA damage by PCNA-containing replication complex; Dual Incision in GG-NER;…	miRNA regulation of DNA damage response; DNA replication; Male infertility; Nucleotide excision repair; DNA repair pathways, full network; Nucleotide excision repair in xeroderma pigmentosum ; DNA mismatch repair; DNA damage response	22	0	1.132	1.217	1.019	0.6	0.597	0.651	0.764	1.12	1.066	1.051	1.091	1.199	1.068	1.013	1.195	1.075	0.9	0.53	0.527	0.575	0.675	0.99
High	Master Protein	Q6ZT12	E3 ubiquitin-protein ligase UBR3 OS=Homo sapiens OX=9606 GN=UBR3 PE=2 SV=2	0	FALSE	6.644	1	2	2	2	1888	212.3	6.1	6.52	2	protein metabolism;other metabolic processes;developmental processes;other biological processes	other membranes;other cell component	other molecular function	Pf02207, Pf18995	130507	ENSG00000144357	UBR3	B4DZR7; hsa:130507; Q2KHN5; Q6ZR55; Q6ZSC2; Q6ZT12; Q8IVE7; Q8ND96			0	0	1.168	0.936	1.078	0.988	1.102	0.771	1.409	2.192	1.757	2.192	1.684	1.757	1.288	1.449	1.251	0.801	0.923	0.846	0.943	0.66	1.206	1.876
High	Master Protein	Q9HAU0	Pleckstrin homology domain-containing family A member 5 OS=Homo sapiens OX=9606 GN=PLEKHA5 PE=1 SV=1	0	FALSE	141.993	40	29	57	29	1116	127.4	7.53	161.07	29	developmental processes	cytosol;nucleus;other cell component	other molecular function	Pf00169, Pf00397	54477	ENSG00000052126	PLEKHA5	A0JP03; B4DGS1; E9PHQ3; F5H0I0; hsa:54477; Q6NSF8; Q86ST7; Q8N3K6; Q96DY9; Q9BVR4; Q9C0H7; Q9H924; Q9HAU0; Q9NVK8	Synthesis of PIPs at the plasma membrane		1	0	1.08	1.003	0.986	2.105	1.385	1.366	1.295	1.88	1.897	1.995	1.843	1.643	1.56	1.495	1.35	0.928	0.913	1.949	1.282	1.264	1.199	1.74
High	Master Protein	P19823	Inter-alpha-trypsin inhibitor heavy chain H2 OS=Homo sapiens OX=9606 GN=ITIH2 PE=1 SV=2	0.001	FALSE	3.892	1	1	1	1	946	106.4	6.86	3.18	1	protein metabolism;other metabolic processes;other biological processes	non-structural extracellular;ER/Golgi	enzyme regulator activity	Pf00092, Pf06668, Pf08487	3698	ENSG00000151655	ITIH2	hsa:3698; P19823; Q14659; Q15484; Q5T986	Regulation of Insulin-like Growth Factor (IGF) transport and uptake by Insulin-like Growth Factor Binding Proteins (IGFBPs); Post-translational protein phosphorylation		2	0
High	Master Protein	P18754	Regulator of chromosome condensation OS=Homo sapiens OX=9606 GN=RCC1 PE=1 SV=1	0	FALSE	69.802	43	10	25	10	421	44.9	7.52	101.98	10	cell cycle OR cell proliferation;cell organization and biogenesis;signal transduction;other biological processes	other membranes;nucleus;other cell component	enzyme regulator activity;nucleic acid binding activity;other molecular function	Pf00415	1104	ENSG00000180198	RCC1	hsa:1104; P18754; Q16269; Q6NT97	Rev-mediated nuclear export of HIV RNA; Nuclear import of Rev protein; Postmitotic nuclear pore complex (NPC) reformation	22q11.2 copy number variation syndrome	4	0	1.218	1.094	1.741	0.541	0.566	0.574	0.544	0.912	0.631	0.667	0.826	1.073	0.969	0.62	0.988	0.899	1.429	0.445	0.465	0.471	0.447	0.749
High	Master Protein	Q9NZV5	Selenoprotein N OS=Homo sapiens OX=9606 GN=SELENON PE=1 SV=5	0	FALSE	7.431	6	3	4	3	590	65.8	5.48	8	3	developmental processes;other biological processes	other membranes;ER/Golgi	other molecular function		57190	ENSG00000162430	SELENON	A6NJG8; A8MQ64; hsa:57190; Q6PI70; Q969F6; Q9NUI6; Q9NZV5		Selenium micronutrient network	1	0	0.949	0.854	0.947	1.05	0.696	1.104	0.97	0.487	0.463	0.371	0.534	0.65	0.624	0.545	0.779	0.901	0.998	1.107	0.734	1.164	1.023	0.513
High	Master Protein	P49441	Inositol polyphosphate 1-phosphatase OS=Homo sapiens OX=9606 GN=INPP1 PE=1 SV=1	0.006	FALSE	2.39	5	1	1	1	399	44	5.26	0	1	other metabolic processes;signal transduction	cytosol	other molecular function	Pf00459	3628	ENSG00000151689	INPP1	hsa:3628; P49441	Synthesis of IP2, IP, and Ins in the cytosol		1	0
High	Master Protein	Q96KB5	Lymphokine-activated killer T-cell-originated protein kinase OS=Homo sapiens OX=9606 GN=PBK PE=1 SV=3	0	FALSE	34.597	32	8	16	8	322	36.1	5.12	39.83	8	cell cycle OR cell proliferation;protein metabolism;other metabolic processes;signal transduction;other biological processes	nucleus	kinase activity;other molecular function	Pf00069	55872	ENSG00000168078	PBK	B4DX68; D3DST2; hsa:55872; Q96KB5; Q9NPD9; Q9NYL7; Q9NZK6		4-hydroxytamoxifen, Dexamethasone, and Retinoic Acids Regulation of p27 Expression; VEGFA-VEGFR2 signaling pathway	2	0	1.204	1.047	0.659	0.573	0.666	0.783	0.849	3.601	3.031	3.014	3.422	1.615	1.498	1.346	1.227	0.87	0.547	0.476	0.553	0.65	0.705	2.99
High	Master Protein	O43166	Signal-induced proliferation-associated 1-like protein 1 OS=Homo sapiens OX=9606 GN=SIPA1L1 PE=1 SV=4	0	FALSE	91.251	18	22	35	3	1804	199.9	8.19	99.61	22	cell organization and biogenesis;signal transduction;other biological processes	plasma membrane;other membranes;cytoskeleton;other cell component	signal transduction activity or receptor binding;enzyme regulator activity	Pf02145, Pf11881	26037	ENSG00000197555	SIPA1L1	hsa:26037; J3KP19; O43166; O95321; Q9UDU4; Q9UNU4	Neurexins and neuroligins		1	8	0.919	0.99	1.701	1.253	1.295	1.08	1.121	0.723	0.737	0.832	0.716	1.185	1.111	1.145	1.158	1.077	1.85	1.363	1.409	1.175	1.219	0.786
Medium	Master Protein	B5MCF3	Protein GUCD1 (Fragment) OS=Homo sapiens OX=9606 GN=GUCD1 PE=1 SV=2	0.027	FALSE	1.528	7	1	1	1	127	14.8	7.43	2.05	1				Pf09778		ENSG00000138867	GUCD1	B5MCF3			0	0	0.885	0.667	0.481	0.868	1.059	1.474	1.05	0.962	1.064	1.044	1.016	1.376	1.104	1.049	0.887	0.754	0.544	0.982	1.197	1.666	1.187	1.088
High	Master Protein	P24539	ATP synthase F(0) complex subunit B1, mitochondrial OS=Homo sapiens OX=9606 GN=ATP5PB PE=1 SV=2	0	FALSE	68.446	55	14	53	14	256	28.9	9.36	147.34	14	cell organization and biogenesis;other metabolic processes;transport	other membranes;mitochondrion;nucleus	transporter activity	Pf05405	515	ENSG00000116459	ATP5PB	hsa:515; P24539; Q9BQ68; Q9BRU8	Cristae formation; Formation of ATP by chemiosmotic coupling	Electron transport chain: OXPHOS system in mitochondria; 7q11.23 copy number variation syndrome; Oxidative phosphorylation	5	0	1.01	1.118	0.839	1.001	1.059	1.09	1.076	0.755	0.769	0.822	0.761	0.777	0.736	0.8	0.823	1.108	0.831	0.991	1.049	1.08	1.066	0.748
High	Master Protein	Q5TB21	Anterior pharynx defective 1 homolog A (C. elegans) (Fragment) OS=Homo sapiens OX=9606 GN=APH1A PE=1 SV=1	0	FALSE	5.845	9	1	2	1	150	15.8	6.27	6.8	1	protein metabolism;other metabolic processes;signal transduction;other biological processes	other membranes		Pf06105		ENSG00000117362	APH1A	A6NM39; Q5TB21		Alzheimer's disease and miRNA effects; Notch signaling; Alzheimer's disease	3	0	0.994	1.083	0.792	1.2	0.973	0.804	0.733	0.702	0.575	0.749	0.786	0.817	0.865	0.902	1.095	1.09	0.797	1.207	0.979	0.809	0.738	0.706
Medium	Master Protein	A0A1X7SC99	Zinc finger E-box-binding homeobox 2 (Fragment) OS=Homo sapiens OX=9606 GN=ZEB2 PE=1 SV=1	0.021	FALSE	1.721	2	1	1	1	612	68.4	6.62	0	1				Pf00096, Pf05605		ENSG00000169554	ZEB2	A0A1X7SC99		Mammary gland development pathway - Embryonic development (Stage 1 of 4); Epithelial to mesenchymal transition in colorectal cancer	2	0
High	Master Protein	P43304	Glycerol-3-phosphate dehydrogenase, mitochondrial OS=Homo sapiens OX=9606 GN=GPD2 PE=1 SV=3	0	FALSE	153.78	57	32	86	32	727	80.8	7.69	229.54	32	other metabolic processes	other membranes;mitochondrion;other cell component	other molecular function	Pf01266, Pf16901	2820	ENSG00000115159	GPD2	A8K4V0; B3KSA9; hsa:2820; P43304; Q59FR1; Q9HAP9	Triglyceride catabolism; Synthesis of PA	Fatty acid beta-oxidation	3	0	0.98	1.111	0.925	1.052	1.21	1.245	1.253	1.091	1.144	1.098	1.12	0.946	0.937	1.011	1.083	1.133	0.943	1.073	1.234	1.27	1.278	1.112
High	Master Protein	O95926	Pre-mRNA-splicing factor SYF2 OS=Homo sapiens OX=9606 GN=SYF2 PE=1 SV=1	0	FALSE	11.258	21	3	4	3	243	28.7	8.4	10.99	3	cell cycle OR cell proliferation;RNA metabolism OR transcription;other metabolic processes;stress response;developmental processes;signal transduction;other biological processes	nucleus;other cell component		Pf08231	25949	ENSG00000117614	SYF2	hsa:25949; O95926; Q5TH73	mRNA Splicing - Major Pathway		1	0
High	Master Protein	Q8WW12	PEST proteolytic signal-containing nuclear protein OS=Homo sapiens OX=9606 GN=PCNP PE=1 SV=2	0	FALSE	31.446	52	7	13	7	178	18.9	7.49	30.33	7	cell cycle OR cell proliferation;protein metabolism;other metabolic processes	nucleus		Pf15473	57092	ENSG00000081154	PCNP	B2RBE7; D3DN52; hsa:57092; Q53GF3; Q6AI44; Q8WW12; Q96CU3; Q9NS81			0	0	1.098	1.142	1.122	0.974	0.814	0.865	0.824	1.454	1.43	1.426	1.482	1.491	1.442	1.238	1.357	1.04	1.022	0.888	0.742	0.789	0.751	1.325
High	Master Protein	H0YIS7	RNASEK-C17orf49 readthrough (Fragment) OS=Homo sapiens OX=9606 GN=RNASEK-C17orf49 PE=4 SV=1	0	FALSE	11.147	21	2	2	2	233	24.9	5.48	8.12	2		other membranes;cytosol;nucleus				ENSG00000161939	RNASEK-C17orf49	H0YIS7			0	0
High	Master Protein	Q15631	Translin OS=Homo sapiens OX=9606 GN=TSN PE=1 SV=1	0	FALSE	42.173	42	8	26	8	228	26.2	6.44	66.1	8	DNA metabolism;RNA metabolism OR transcription;other metabolic processes	cytosol;ER/Golgi;nucleus;other cell component	nucleic acid binding activity;other molecular function	Pf01997	7247	ENSG00000211460	TSN	B7Z3X8; hsa:7247; Q15631; Q5U0K7	Small interfering RNA (siRNA) biogenesis		1	0	1.133	1.008	0.851	0.94	1.081	1.079	1.092	1.827	1.752	1.623	1.735	1.591	1.434	1.596	1.317	0.89	0.751	0.83	0.955	0.952	0.964	1.613
High	Master Protein	K7EK11	N-acetylglutamate synthase, mitochondrial (Fragment) OS=Homo sapiens OX=9606 GN=NAGS PE=1 SV=1	0	FALSE	9.901	5	3	4	3	511	55.9	8.38	10.4	3	other metabolic processes	mitochondrion	other molecular function	Pf04768		ENSG00000161653	NAGS	K7EK11			0	0	0.789	0.872	0.607	0.904	0.767	0.873	0.969	0.564	0.545	0.582	0.558	0.839	0.831	0.78	0.93	1.105	0.77	1.147	0.973	1.107	1.229	0.716
High	Master Protein	Q15058	Kinesin-like protein KIF14 OS=Homo sapiens OX=9606 GN=KIF14 PE=1 SV=1	0	FALSE	67.033	13	17	23	17	1648	186.4	7.91	64.26	17	cell adhesion;cell cycle OR cell proliferation;cell organization and biogenesis;protein metabolism;other metabolic processes;developmental processes;other biological processes	cytosol;cytoskeleton;nucleus;other cell component	cytoskeletal activity;other molecular function	Pf00225, Pf00498, Pf16183	9928	ENSG00000118193	KIF14	hsa:9928; Q14CI8; Q15058; Q4G0A5; Q5T1W3	RND2 GTPase cycle; RND1 GTPase cycle; RHO GTPases activate CIT		3	0	1.073	1.043	1.06	0.98	1.004	1.034	1.106	1.265	1.337	1.211	1.238	0.765	0.882	0.829	0.765	0.972	0.987	0.913	0.935	0.963	1.03	1.179
High	Master Protein	C9JBM3	1-acylglycerol-3-phosphate O-acyltransferase ABHD5 (Fragment) OS=Homo sapiens OX=9606 GN=ABHD5 PE=1 SV=8	0.004	FALSE	2.651	16	1	1	1	126	14.1	8.18	2.67	1	protein metabolism		other molecular function	Pf00561		ENSG00000011198	ABHD5	C9JBM3		Lipid metabolism pathway	1	0
High	Master Protein	Q9NVX0	HAUS augmin-like complex subunit 2 OS=Homo sapiens OX=9606 GN=HAUS2 PE=1 SV=1	0	FALSE	8.195	11	2	4	2	235	26.9	7.88	5.56	2	cell cycle OR cell proliferation;cell organization and biogenesis;other biological processes	cytosol;cytoskeleton		Pf15003	55142	ENSG00000137814	HAUS2	C9JH36; hsa:55142; Q9H9B3; Q9NVX0	Recruitment of NuMA to mitotic centrosomes; Recruitment of mitotic centrosome proteins and complexes; Regulation of PLK1 Activity at G2/M Transition; Loss of Nlp from mitotic centrosomes; Anchoring of the basal body to the plasma membrane; AURKA Activation by TPX2		7	0	1.162	1.229	1.148	1.016	0.985	0.948	0.999	1.603	1.536	2.13	1.493	1.377	1.413	1.397	1.379	1.058	0.988	0.874	0.848	0.816	0.859	1.38
High	Master Protein	B9EGQ5	Protein Wiz OS=Homo sapiens OX=9606 GN=WIZ PE=1 SV=1	0	FALSE	32.22	17	10	11	1	832	89	9.48	29.04	10		nucleus;other cell component				ENSG00000011451	WIZ	B9EGQ5			0	0
High	Master Protein	A0A494C0G1	Phosphoacetylglucosamine mutase OS=Homo sapiens OX=9606 GN=PGM3 PE=1 SV=1	0	FALSE	23.369	15	7	10	7	501	55.4	6.42	23.88	7	other metabolic processes		other molecular function	Pf00408, Pf02878		ENSG00000013375	PGM3	A0A494C0G1		Glucuronidation	1	0	1.11	1.096	1.073	0.767	1.349	1.189	1.355	2.245	2.261	1.709	1.979	1.513	1.6	1.609	1.519	0.988	0.967	0.691	1.216	1.072	1.221	2.024
High	Master Protein	P23497	Nuclear autoantigen Sp-100 OS=Homo sapiens OX=9606 GN=SP100 PE=1 SV=3	0	FALSE	34.633	14	9	11	8	879	100.4	8.22	31.5	9	cell organization and biogenesis;DNA metabolism;stress response;signal transduction;other biological processes	nucleus;other cell component	nucleic acid binding activity;other molecular function	Pf00505, Pf01342, Pf03172, Pf09011	6672	ENSG00000067066	SP100	B4DDX5; B8ZZD8; E7EUA7; E9PH61; F8WFE2; hsa:6672; O75450; P23497; Q13343; Q8TE34; Q96F70; Q96T24; Q96T95; Q9NP33; Q9UE32	SUMOylation of DNA damage response and repair proteins; Interferon gamma signaling		2	0	1.115	1.182	1.587	1.18	1.45	1.332	1.258	1.552	1.519	1.485	1.743	1.214	1.471	1.352	1.538	1.06	1.424	1.059	1.3	1.195	1.128	1.393
High	Master Protein	Q86YV5	Inactive tyrosine-protein kinase PRAG1 OS=Homo sapiens OX=9606 GN=PRAG1 PE=1 SV=4	0	FALSE	19.512	6	7	9	7	1406	149.5	7.2	21.58	7	protein metabolism;other metabolic processes;other biological processes	nucleus;other cell component	kinase activity;other molecular function	Pf00069	157285	ENSG00000275342	PRAG1	hsa:157285; Q86YV5; Q8N3N5	RND2 GTPase cycle		1	0
High	Master Protein	A0A087X0R6	Sorting nexin-12 OS=Homo sapiens OX=9606 GN=SNX12 PE=1 SV=1	0	FALSE	27.695	32	6	14	5	172	19.8	7.78	37.53	6			other molecular function	Pf00787		ENSG00000147164	SNX12	A0A087X0R6			0	1	1.06	1.046	1.121	1.045	1.229	1.088	1.216	1.405	1.498	1.399	1.506	1.345	1.244	1.37	1.301	0.986	1.058	0.986	1.159	1.027	1.147	1.326
Medium	Master Protein	O00462	Beta-mannosidase OS=Homo sapiens OX=9606 GN=MANBA PE=1 SV=3	0.016	FALSE	1.845	1	1	1	1	879	100.8	5.52	2.84	1	protein metabolism;other metabolic processes;transport	plasma membrane;other membranes;other cytoplasmic organelle	other molecular function	Pf02836, Pf17753, Pf17786	4126	ENSG00000109323	MANBA	hsa:4126; O00462; Q96BC3; Q9NYX9	Neutrophil degranulation; Lysosomal oligosaccharide catabolism		2	0
High	Master Protein	Q14703	Membrane-bound transcription factor site-1 protease OS=Homo sapiens OX=9606 GN=MBTPS1 PE=1 SV=1	0	FALSE	21.475	9	7	7	7	1052	117.7	8.75	18.7	7	cell organization and biogenesis;protein metabolism;other metabolic processes;stress response;transport;signal transduction;other biological processes	other membranes;ER/Golgi	other molecular function	Pf00082	8720	ENSG00000140943	MBTPS1	A8K6V8; hsa:8720; Q14703; Q24JQ2; Q9UF67	Regulation of Insulin-like Growth Factor (IGF) transport and uptake by Insulin-like Growth Factor Binding Proteins (IGFBPs); Post-translational protein phosphorylation; Regulation of cholesterol biosynthesis by SREBP (SREBF); ATF6 (ATF6-alpha) activates chaperones; CREB3 factors activate genes; Assembly of active LPL and LIPC lipase complexes	Sterol regulatory element-binding proteins (SREBP) signaling; IL-18 signaling pathway; Type I collagen synthesis in the context of osteogenesis imperfecta; Unfolded protein response	10	0	1.01	1.189	1.07	1.056	0.98	1.052	1.029	0.428	0.514	0.392	0.452	0.91	0.791	1.016	1.009	1.177	1.059	1.046	0.97	1.041	1.018	0.424
High	Master Protein	Q12769	Nuclear pore complex protein Nup160 OS=Homo sapiens OX=9606 GN=NUP160 PE=1 SV=3	0	FALSE	98.544	22	23	49	23	1436	162	5.5	133.6	23	cell cycle OR cell proliferation;cell organization and biogenesis;protein metabolism;other metabolic processes;transport;developmental processes;other biological processes	cytosol;nucleus;other cell component	other molecular function	Pf11715	23279	ENSG00000030066	NUP160	B4DYE8; B4E2J9; hsa:23279; Q08AD3; Q12769; Q7Z5X6; Q96GB3; Q9H660	Rev-mediated nuclear export of HIV RNA; Nuclear import of Rev protein; Postmitotic nuclear pore complex (NPC) reformation; SUMOylation of DNA damage response and repair proteins; Separation of Sister Chromatids; Resolution of Sister Chromatid Cohesion; RHO GTPases Activate Formins; EML4 and NUDC in mitotic spindle formation; Amplification of signal from unattached kinetochores via a MAD2 inhibito…		34	0	1.151	1.003	1.515	0.866	1.023	1.091	1.057	1.532	1.302	1.212	1.49	1.714	1.471	1.422	1.59	0.871	1.316	0.752	0.889	0.948	0.919	1.332
High	Master Protein	P27695	DNA-(apurinic or apyrimidinic site) lyase OS=Homo sapiens OX=9606 GN=APEX1 PE=1 SV=2	0	FALSE	44.753	33	8	24	8	318	35.5	8.12	84.89	8	cell organization and biogenesis;DNA metabolism;RNA metabolism OR transcription;other metabolic processes;stress response;other biological processes	cytoskeleton;mitochondrion;ER/Golgi;translational apparatus;nucleus;other cell component	nucleic acid binding activity;other molecular function	Pf03372	328	ENSG00000100823	APEX1	hsa:328; P27695; Q969L5; Q99775	Displacement of DNA glycosylase by APEX1; POLB-Dependent Long Patch Base Excision Repair; PCNA-Dependent Long Patch Base Excision Repair; Abasic sugar-phosphate removal via the single-nucleotide replacement pathway	Thyroid stimulating hormone (TSH) signaling pathway; Spinal cord injury; Base excision repair; DNA repair pathways, full network	10	0	1.033	1.058	1.357	0.827	0.891	0.855	0.876	0.795	0.69	0.667	0.695	1.233	1.011	0.924	1.165	1.025	1.314	0.8	0.863	0.828	0.848	0.77
High	Master Protein	A0A1W2PQK5	Calcium-activated potassium channel subunit alpha-1 OS=Homo sapiens OX=9606 GN=KCNMA1 PE=1 SV=1	0	FALSE	66.461	18	15	24	15	1177	130.8	6.89	80.06	15	transport	plasma membrane;other membranes	transporter activity	Pf00520, Pf03493	3778	ENSG00000156113	KCNMA1	A0A1W2PQK5		Splicing factor NOVA regulated synaptic proteins	1	0	0.905	0.881	0.815	1.113	1.094	1.102	1.055	0.492	0.525	0.474	0.443	0.324	0.411	0.322	0.383	0.974	0.901	1.23	1.209	1.218	1.165	0.544
High	Master Protein	C9JC32	Trafficking kinesin-binding protein 1 OS=Homo sapiens OX=9606 GN=TRAK1 PE=1 SV=1	0.001	FALSE	4.091	4	2	2	2	895	99.6	5.81	2.25	2		mitochondrion;other cytoplasmic organelle		Pf04849, Pf12448		ENSG00000182606	TRAK1	C9JC32			0	0
High	Master Protein	A0A1W2PNP0	GPI transamidase component PIG-T (Fragment) OS=Homo sapiens OX=9606 GN=PIGT PE=1 SV=1	0	FALSE	47.721	31	14	22	14	580	65.9	8.65	54.35	14	protein metabolism;other metabolic processes;developmental processes;other biological processes	other membranes;ER/Golgi;other cell component		Pf04113		ENSG00000124155	PIGT	A0A1W2PNP0			0	0	0.971	0.942	0.92	0.737	0.762	0.769	0.764	0.419	0.419	0.402	0.413	0.532	0.564	0.537	0.567	0.97	0.947	0.759	0.785	0.792	0.787	0.431
Medium	Master Protein	Q70EK8	Inactive ubiquitin carboxyl-terminal hydrolase 53 OS=Homo sapiens OX=9606 GN=USP53 PE=1 SV=2	0.026	FALSE	1.547	1	1	1	1	1073	120.7	7.59	0	1	protein metabolism;other metabolic processes;other biological processes	other cell component		Pf00443	54532	ENSG00000145390	USP53	hsa:54532; Q68DA5; Q70EK8; Q8WVQ5; Q9P2J7			0	0
Medium	Master Protein	Q71SY5	Mediator of RNA polymerase II transcription subunit 25 OS=Homo sapiens OX=9606 GN=MED25 PE=1 SV=2	0.022	FALSE	1.666	2	1	1	1	747	78.1	8.34	0	1	other biological processes	nucleus;other cell component	other molecular function	Pf11232, Pf11235, Pf11244, Pf11265	81857	ENSG00000104973	MED25	A8K095; B9TX30; hsa:81857; O95783; Q6P143; Q6QMH5; Q707U4; Q71SY5; Q8TB55; Q9H0L5; Q9HB34	Generic Transcription Pathway; PPARA activates gene expression; Transcriptional regulation of white adipocyte differentiation		3	0	1.006	1.271	0.906	0.873	0.718	0.813	0.763	0.842	0.894	0.622	0.765	1.043	0.874	0.894	0.987	1.263	0.9	0.868	0.713	0.808	0.759	0.837
High	Master Protein	F8W9V1	Succinate dehydrogenase assembly factor 3, mitochondrial OS=Homo sapiens OX=9606 GN=SDHAF3 PE=1 SV=1	0	FALSE	5.865	25	2	3	2	68	8	9.72	6.74	2	cell organization and biogenesis	mitochondrion		Pf13233		ENSG00000196636	SDHAF3	F8W9V1		Mitochondrial complex II assembly	1	0	0.801	0.973	0.543	1.866	1.689	1.832	1.588	0.384	0.496	0.471	0.389	0.458	0.686	0.418	0.62	1.214	0.678	2.329	2.109	2.287	1.983	0.48
High	Master Protein	G3V3H3	Kinesin light chain 1 OS=Homo sapiens OX=9606 GN=KLC1 PE=1 SV=1	0	FALSE	116.316	40	23	45	1	609	68.7	5.96	133.25	23		cytoskeleton;other cell component		Pf13374, Pf13424		ENSG00000126214	KLC1	G3V3H3		Alzheimer's disease and miRNA effects; Alzheimer's disease	2	0	0.855	0.926	1.094	1.089	1.302	1.513	1.216	3.242	3.835	3.671	3.246	1.684	1.797	1.645	1.711	1.082	1.279	1.274	1.522	1.769	1.422	3.79
High	Master Protein	J3QRU8	ARF GTPase-activating protein GIT1 OS=Homo sapiens OX=9606 GN=GIT1 PE=1 SV=1	0	FALSE	45.524	24	11	16	10	694	76.8	6.51	45.04	11	other biological processes	cytosol;mitochondrion;other cell component	enzyme regulator activity;other molecular function	Pf01412, Pf08518, Pf12205, Pf12796, Pf16559		ENSG00000108262	GIT1	J3QRU8			0	1	1.087	1.113	1.322	1.129	1.092	1.243	1.178	1.784	2.016	1.902	1.859	1.729	1.549	1.655	1.605	1.024	1.217	1.039	1.005	1.144	1.083	1.642
High	Master Protein	A0A0A0MT64	NADPH:adrenodoxin oxidoreductase, mitochondrial OS=Homo sapiens OX=9606 GN=FDXR PE=1 SV=1	0	FALSE	39.141	34	11	17	1	534	58.2	7.87	39.87	11	other metabolic processes	mitochondrion	other molecular function		2232	ENSG00000161513	FDXR	A0A0A0MT64			0	0
High	Master Protein	Q5VV50	Zinc finger protein 691 OS=Homo sapiens OX=9606 GN=ZNF691 PE=1 SV=1	0	FALSE	5.545	7	2	6	1	306	34.6	8.29	12.25	2				Pf00096	51058	ENSG00000164011	ZNF691	Q5VV50			0	0	1.017	1.001	0.7	0.429	0.466	0.658	0.553	0.607	0.356	0.632	0.431	0.883	0.662	0.518	0.69	0.985	0.688	0.422	0.459	0.647	0.544	0.597
High	Master Protein	Q9BRP4	Proteasomal ATPase-associated factor 1 OS=Homo sapiens OX=9606 GN=PAAF1 PE=1 SV=2	0	FALSE	18.745	11	4	6	3	392	42.2	6.32	19.1	4	other biological processes	other cell component		Pf00400	80227	ENSG00000175575	PAAF1	A6NDR5; B4DPB0; B7ZAS9; hsa:80227; Q4G165; Q53HS9; Q7Z500; Q8TBU6; Q9BRP4; Q9HAB6			0	0	1.026	0.911	1.044	0.568	1.239	1.244	1.226	2.057	1.734	2.133	1.946	1.543	1.642	1.749	1.578	0.888	1.017	0.554	1.208	1.212	1.194	2.005
High	Master Protein	C9JW52	Insulin-like growth factor-binding protein 2 (Fragment) OS=Homo sapiens OX=9606 GN=IGFBP2 PE=1 SV=1	0	FALSE	5.584	17	1	1	1	78	8.7	10.2	4.45	1	other biological processes	non-structural extracellular				ENSG00000115457	IGFBP2	C9JW52			0	0	0.691	0.808	1.039	0.896	0.757	0.915	0.723	0.412	0.267	0.242	0.352	0.48	0.672	0.53	0.738	1.169	1.504	1.298	1.096	1.325	1.046	0.597
High	Master Protein	Q5SZM1	TBC1 domain family member 7 (Fragment) OS=Homo sapiens OX=9606 GN=TBC1D7 PE=1 SV=1	0.003	FALSE	2.865	7	1	1	1	156	18.4	6.21	2.79	1	other biological processes		enzyme regulator activity			ENSG00000145979	TBC1D7	Q5SZM1		Fragile X syndrome	1	0
High	Master Protein	A0A0C4DFL7	Lanosterol 14-alpha demethylase OS=Homo sapiens OX=9606 GN=CYP51A1 PE=1 SV=1	0	FALSE	94.273	53	18	41	16	509	57.2	8.53	112.49	18	other metabolic processes	other membranes;ER/Golgi	other molecular function	Pf00067	1595	ENSG00000001630	CYP51A1	A0A0C4DFL7; hsa:1595		Cholesterol biosynthesis pathway; Sterol regulatory element-binding proteins (SREBP) signaling; Oxidation by cytochrome P450; Cholesterol metabolism with Bloch and Kandutsch-Russell pathways; Cholesterol biosynthesis with skeletal dysplasias; Metapathway biotransformation Phase I and II	6	2	1.023	0.99	1.218	0.819	0.948	0.955	0.948	0.682	0.664	0.758	0.685	0.582	0.624	0.641	0.599	0.968	1.191	0.801	0.927	0.934	0.927	0.666
High	Master Protein	A0A087WUR6	Calcium/calmodulin-dependent protein kinase type 1D OS=Homo sapiens OX=9606 GN=CAMK1D PE=1 SV=1	0	FALSE	4.822	6	1	3	1	291	32.5	7.4	9.94	1	protein metabolism;other metabolic processes		kinase activity;other molecular function	Pf00069		ENSG00000183049	CAMK1D	A0A087WUR6			0	0
High	Master Protein	J3KR97	Tubulin-specific chaperone D OS=Homo sapiens OX=9606 GN=TBCD PE=1 SV=1	0	FALSE	54.361	14	14	17	14	1230	136.5	6.34	45.99	14	cell organization and biogenesis;other biological processes		enzyme regulator activity;cytoskeletal activity	Pf12612		ENSG00000141556	TBCD	J3KR97			0	0	1.141	1.118	0.997	0.649	0.948	0.938	0.996	1.837	1.431	1.676	1.651	1.464	1.101	1.41	0.932	0.98	0.874	0.569	0.831	0.822	0.873	1.61
High	Master Protein	C9JLV4	Apoptotic protease-activating factor 1 OS=Homo sapiens OX=9606 GN=APAF1 PE=1 SV=1	0	FALSE	19.866	7	6	6	6	1163	132.4	6.51	12.94	6	other biological processes		other molecular function	Pf00400, Pf00619, Pf00931, Pf17908		ENSG00000120868	APAF1	C9JLV4		miRNA regulation of DNA damage response; Alzheimer's disease and miRNA effects; Nanomaterial induced apoptosis; Oxidative damage response; miRNA regulation of p53 pathway in prostate cancer; Small cell lung cancer; Hepatitis B infection; Regucalcin in proximal tubule epithelial kidney cells; Host-pathogen interaction of human coronaviruses - apoptosis; p53 transcriptional gene network; Alzheimer'…	12	0	0.799	0.973	1.059	0.794	0.944	0.835	1.021	1.336	1.271	1.352	1.215	0.975	1.019	0.913	1.003	1.217	1.325	0.993	1.181	1.044	1.278	1.671
High	Master Protein	Q5TCU3	Tropomyosin beta chain OS=Homo sapiens OX=9606 GN=TPM2 PE=1 SV=1	0	FALSE	61.5	46	13	48	3	284	32.8	4.68	133.45	13		cytoskeleton	cytoskeletal activity	Pf00261	7169	ENSG00000198467	TPM2	Q5TCU3		Striated muscle contraction pathway	1	0	0.888	0.991	0.684	0.57	0.736	0.82	0.8	1.247	1.364	1.315	1.095	0.444	0.563	0.471	0.525	1.116	0.77	0.642	0.829	0.924	0.901	1.404
High	Master Protein	Q9NXS2	Glutaminyl-peptide cyclotransferase-like protein OS=Homo sapiens OX=9606 GN=QPCTL PE=1 SV=2	0	FALSE	20.058	24	6	9	6	382	42.9	9.82	21.77	6	protein metabolism;other metabolic processes	other membranes;ER/Golgi	other molecular function	Pf04389	54814	ENSG00000011478	QPCTL	hsa:54814; Q53HE4; Q96F74; Q9NXS2			0	0	0.991	0.997	1.513	0.871	1.227	1.025	1.043	0.841	0.809	0.73	0.908	1.002	0.884	1.183	1.067	1.007	1.527	0.879	1.238	1.035	1.053	0.849
High	Master Protein	G3V4K3	Spermatogenesis-defective protein 39 homolog OS=Homo sapiens OX=9606 GN=VIPAS39 PE=1 SV=1	0	FALSE	49.004	25	10	17	10	519	59.7	8.1	60.35	10	cell organization and biogenesis;protein metabolism;other metabolic processes;transport	other cytoplasmic organelle		Pf04840		ENSG00000151445	VIPAS39	G3V4K3			0	0	1.028	1.17	1.041	0.696	0.96	0.938	0.797	0.531	0.596	0.665	0.562	0.758	0.717	0.882	0.736	1.137	1.013	0.677	0.933	0.912	0.775	0.516
High	Master Protein	A0A5F9ZH18	Ankyrin-2 OS=Homo sapiens OX=9606 GN=ANK2 PE=1 SV=1	0	FALSE	9.745	5	4	4	3	1109	124.4	4.92	8.49	4	signal transduction			Pf00531, Pf00791, Pf17809		ENSG00000145362	ANK2	A0A5F9ZH18			0	0	1.242	0.997	1.774	1.427	1.739	1.04	1.203	0.886	0.908	0.922	0.666	1.125	1.056	1.377	1.249	0.803	1.429	1.149	1.401	0.837	0.969	0.714
Medium	Master Protein	Q53EQ6	Tigger transposable element-derived protein 5 OS=Homo sapiens OX=9606 GN=TIGD5 PE=1 SV=3	0.03	FALSE	1.485	3	1	1	1	642	69.2	8.41	0	1		nucleus	nucleic acid binding activity	Pf03184, Pf03221, Pf04218	84948	ENSG00000179886; ENSG00000278016	TIGD5	E7EWS2; hsa:84948; Q53EQ6; Q6NT83; Q8N5A1; Q96JW8			0	0	1.445	1.558	0.977	2.289	1.826	2.003	1.836	2.082	2.418	2.496	1.68	1.629	2.437	1.808	1.53	1.079	0.676	1.584	1.264	1.387	1.271	1.441
High	Master Protein	Q8NC44	Reticulophagy regulator 2 OS=Homo sapiens OX=9606 GN=RETREG2 PE=1 SV=3	0	FALSE	24.928	24	6	11	3	543	57.8	4.45	36.76	6		other membranes			79137	ENSG00000144567	RETREG2	hsa:79137; Q6P1P5; Q8NC44; Q9H0K7			0	0	0.879	0.934	0.709	0.869	1.104	0.976	1.095	0.857	0.609	1.132	1.022	1.184	1.282	0.823	1.19	1.063	0.806	0.988	1.255	1.11	1.245	0.974
High	Master Protein	Q7Z2E3	Aprataxin OS=Homo sapiens OX=9606 GN=APTX PE=1 SV=2	0	FALSE	12.163	16	4	4	1	356	40.7	9.17	9.62	4	DNA metabolism;other metabolic processes;stress response;other biological processes	nucleus;other cell component	nucleic acid binding activity;other molecular function	Pf11969, Pf16278, Pf17913	54840	ENSG00000137074	APTX	A8MTN4; D3DRK9; D3DRL0; hsa:54840; Q0P662; Q5T781; Q5T782; Q5T784; Q6JV81; Q6JV82; Q6JV85; Q7Z2E3; Q7Z2F3; Q7Z336; Q7Z5R5; Q7Z6V7; Q7Z6V8; Q9NXM5			0	2	1.069	1.15	1.006	0.855	0.861	0.843	0.888	1.162	1.008	1.268	1.197	1.288	1.077	1.059	1.023	1.076	0.941	0.8	0.806	0.789	0.83	1.087
High	Master Protein	Q8NBU5	ATPase family AAA domain-containing protein 1 OS=Homo sapiens OX=9606 GN=ATAD1 PE=1 SV=1	0	FALSE	62	52	13	26	13	361	40.7	6.9	80.61	13	cell organization and biogenesis;transport;other biological processes	plasma membrane;other membranes;cytosol;mitochondrion;other cytoplasmic organelle;other cell component	transporter activity;other molecular function	Pf00004, Pf17862	84896	ENSG00000138138; ENSG00000283024	ATAD1	D3DR26; hsa:84896; Q6DKG1; Q6P4B9; Q8N3G1; Q8NBU5; Q8WYR9; Q969Y3	Class I peroxisomal membrane protein import		1	0	0.977	1.024	0.742	1.088	1.097	1.114	1.17	0.765	0.813	0.699	0.803	0.673	0.675	0.702	0.753	1.048	0.759	1.113	1.123	1.14	1.197	0.782
High	Master Protein	Q8WWV3	Reticulon-4-interacting protein 1, mitochondrial OS=Homo sapiens OX=9606 GN=RTN4IP1 PE=1 SV=2	0	FALSE	35.397	28	7	13	7	396	43.6	9.11	39.94	7	developmental processes;other biological processes	other membranes;mitochondrion	other molecular function	Pf08240, Pf13602	84816	ENSG00000130347	RTN4IP1	hsa:84816; Q8N9B3; Q8WWV3; Q8WZ66; Q9BRA4			0	0	0.681	0.942	0.684	0.748	0.905	0.937	0.836	0.477	0.529	0.524	0.481	0.434	0.532	0.463	0.541	1.383	1.003	1.098	1.329	1.375	1.228	0.701
High	Master Protein	P08133	Annexin A6 OS=Homo sapiens OX=9606 GN=ANXA6 PE=1 SV=3	0	FALSE	263.119	75	49	185	19	673	75.8	5.6	511.91	49	cell organization and biogenesis;stress response;transport;developmental processes;signal transduction;other biological processes	other membranes;mitochondrion;other cytoplasmic organelle;other cell component	transporter activity;cytoskeletal activity;other molecular function	Pf00191	309	ENSG00000197043	ANXA6	B7Z8A7; D3DQH4; E9PGK1; hsa:309; P08133; Q6ZT79	Smooth Muscle Contraction	Calcium regulation in cardiac cells; Prostaglandin synthesis and regulation	3	26	1.025	1.025	1.136	0.256	0.824	0.943	0.815	0.762	0.815	0.785	0.801	0.827	0.915	0.911	0.833	1	1.108	0.25	0.804	0.92	0.795	0.744
High	Master Protein	P26373	60S ribosomal protein L13 OS=Homo sapiens OX=9606 GN=RPL13 PE=1 SV=4	0	FALSE	34.178	31	7	42	7	211	24.2	11.65	95.83	7	protein metabolism;RNA metabolism OR transcription;other metabolic processes;transport;developmental processes;other biological processes	cytosol;ER/Golgi;translational apparatus;nucleus	other molecular function	Pf01294	6137	ENSG00000167526	RPL13	B4DLX3; F5H1S2; hsa:6137; P26373; Q3KQT8; Q567Q8; Q9BPX0	Regulation of expression of SLITs and ROBOs; L13a-mediated translational silencing of Ceruloplasmin expression; Formation of a pool of free 40S subunits; GTP hydrolysis and joining of the 60S ribosomal subunit; Major pathway of rRNA processing in the nucleolus and cytosol; Nonsense Mediated Decay (NMD) enhanced by the Exon Junction Complex (EJC); SRP-dependent cotranslational protein targeting to…	Cytoplasmic ribosomal proteins	14	0	1.066	1.047	0.851	1.085	0.928	0.866	0.955	0.683	0.695	0.666	0.683	0.913	0.846	0.923	0.849	0.983	0.799	1.018	0.871	0.812	0.896	0.641
High	Master Protein	A0A494C0W0	Poly(A)-specific ribonuclease PARN OS=Homo sapiens OX=9606 GN=PARN PE=1 SV=1	0	FALSE	16.089	7	4	6	4	664	76.3	6.18	19.13	4	RNA metabolism OR transcription;other metabolic processes	nucleus;other cell component	nucleic acid binding activity;other molecular function	Pf04857, Pf08675		ENSG00000140694	PARN	A0A494C0W0		Lung fibrosis	1	0	1.538	1.537	1.815	0.975	1.038	1.102	1.196	3.13	2.954	3.021	3.245	2.944	2.769	2.084	2.363	0.999	1.18	0.634	0.675	0.716	0.777	2.035
High	Master Protein	E7EX21	Collagen alpha-1(XIII) chain OS=Homo sapiens OX=9606 GN=COL13A1 PE=1 SV=1	0	FALSE	9.662	5	3	4	3	582	57.6	9.48	10.7	3				Pf01391		ENSG00000197467	COL13A1	E7EX21			0	0	1.034	1.012	1.045	0.668	0.894	0.928	0.95	0.65	0.663	0.6	0.582	0.361	0.461	0.496	0.551	0.979	1.011	0.646	0.864	0.897	0.919	0.629
High	Master Protein	K7ELE1	GPI ethanolamine phosphate transferase 1 OS=Homo sapiens OX=9606 GN=PIGN PE=1 SV=2	0.002	FALSE	3.02	5	2	2	2	490	55.9	8.12	2.14	2	protein metabolism;other metabolic processes	plasma membrane;other membranes;cytosol;ER/Golgi	other molecular function	Pf01663, Pf04987		ENSG00000197563	PIGN	K7EK83; K7ELE1			0	0
High	Master Protein	Q5TF45	Peptide chain release factor 1-like, mitochondrial (Fragment) OS=Homo sapiens OX=9606 GN=MTRF1L PE=1 SV=8	0.003	FALSE	2.906	8	1	2	1	163	18.2	9.94	5.56	1	cell organization and biogenesis;protein metabolism;other metabolic processes	mitochondrion	nucleic acid binding activity	Pf00472, Pf03462		ENSG00000112031	MTRF1L	Q5TF45			0	0
High	Master Protein	H7C389	WD repeat-containing protein 92 (Fragment) OS=Homo sapiens OX=9606 GN=WDR92 PE=1 SV=1	0.004	FALSE	2.743	10	1	1	1	92	10.5	9.99	2.75	1						ENSG00000243667	DNAAF10	H7C389			0	0	0.663	0.845	1.013	0.771	0.672	0.704	0.876	0.934	1.162	0.749	0.816	1.247	1.221	1.074	1.142	1.275	1.528	1.162	1.013	1.062	1.32	1.408
High	Master Protein	O43422	52 kDa repressor of the inhibitor of the protein kinase OS=Homo sapiens OX=9606 GN=THAP12 PE=1 SV=2	0	FALSE	14.31	10	5	5	4	761	87.6	5.86	15.05	5	signal transduction;other biological processes	nucleus	nucleic acid binding activity;other molecular function	Pf05485, Pf05699, Pf14291	5612	ENSG00000137492	THAP12	A8K728; hsa:5612; O43422; Q17RY9; Q8WTW1; Q9Y3Z4			0	0
High	Master Protein	O00308	NEDD4-like E3 ubiquitin-protein ligase WWP2 OS=Homo sapiens OX=9606 GN=WWP2 PE=1 SV=2	0	FALSE	17.789	6	4	7	4	870	98.9	7.12	22.83	4	protein metabolism;other metabolic processes;transport;other biological processes	cytosol;nucleus;other cell component	other molecular function	Pf00397, Pf00632	11060	ENSG00000198373	WWP2	A6NEP1; B2R706; B4DTL5; F5H213; H3BRF3; hsa:11060; I3RSG8; O00308; Q6ZTQ5; Q96CZ2; Q9BWN6	RHOQ GTPase cycle; Regulation of PTEN stability and activity; RHOJ GTPase cycle; NOTCH3 Activation and Transmission of Signal to the Nucleus; RHOU GTPase cycle		5	0	0.778	0.757	1.067	1.25	0.998	0.532	0.613	0.402	0.72	0.658	0.508	0.674	0.59	0.62	0.597	0.973	1.371	1.606	1.282	0.683	0.788	0.517
High	Master Protein	E7EXA3	NIF3-like protein 1 (Fragment) OS=Homo sapiens OX=9606 GN=NIF3L1 PE=1 SV=1	0	FALSE	8.689	13	3	3	3	209	23.6	7.03	7.45	3				Pf01784		ENSG00000196290	NIF3L1	E7EXA3			0	0	0.906	0.94	0.805	0.818	1.082	1.071	0.973	1.022	1.127	1.356	1.275	0.908	0.768	0.824	0.742	1.038	0.889	0.903	1.194	1.182	1.074	1.128
Medium	Master Protein	A0A3B3IS87	Forkhead box protein P1 (Fragment) OS=Homo sapiens OX=9606 GN=FOXP1 PE=1 SV=1	0.013	FALSE	1.945	4	1	1	1	468	51.7	7.23	0	1	other biological processes	nucleus	nucleic acid binding activity;other molecular function	Pf00250, Pf16159		ENSG00000114861	FOXP1	A0A3B3IS87			0	0
High	Master Protein	P23786	Carnitine O-palmitoyltransferase 2, mitochondrial OS=Homo sapiens OX=9606 GN=CPT2 PE=1 SV=2	0	FALSE	65.566	34	17	41	16	658	73.7	8.18	108.66	17	other metabolic processes;transport;other biological processes	other membranes;mitochondrion;nucleus	other molecular function	Pf00755	1376	ENSG00000157184	CPT2	B2R6S0; hsa:1376; P23786; Q5SW68; Q9BQ26	PPARA activates gene expression; Carnitine metabolism	Fatty acid beta-oxidation; PPAR-alpha pathway; Nuclear receptors meta-pathway; Mitochondrial long chain fatty acid beta-oxidation; PPAR signaling pathway; Thermogenesis	8	1	0.877	1.044	0.98	0.858	1.016	1.076	0.981	0.748	0.843	0.792	0.805	0.76	0.888	0.825	0.913	1.19	1.117	0.978	1.158	1.226	1.118	0.853
High	Master Protein	Q12792	Twinfilin-1 OS=Homo sapiens OX=9606 GN=TWF1 PE=1 SV=3	0	FALSE	55.623	38	12	28	9	350	40.3	6.96	73.2	12	cell organization and biogenesis;protein metabolism;other metabolic processes;other biological processes	cytosol;cytoskeleton;nucleus;other cell component	cytoskeletal activity;other molecular function	Pf00241	5756	ENSG00000151239	TWF1	A8K5A8; B3KXS6; B4DLX9; hsa:5756; Q12792; Q59G07; Q5U0B1; Q6FHJ1; Q6FHL6; Q6NUK9; Q86XL6; Q8TCD3	Sensory processing of sound by inner hair cells of the cochlea; Sensory processing of sound by outer hair cells of the cochlea; RHOBTB2 GTPase cycle		3	0	1.111	1.13	0.885	1.072	1.013	1.073	1.058	1.794	1.779	1.843	1.726	1.312	1.216	1.329	1.178	1.017	0.797	0.964	0.911	0.966	0.952	1.614
High	Master Protein	Q8N2G8	GH3 domain-containing protein OS=Homo sapiens OX=9606 GN=GHDC PE=1 SV=2	0	FALSE	9.194	5	2	3	2	530	57.5	7.88	8.53	2	transport	non-structural extracellular;ER/Golgi;nucleus;other cell component	other molecular function	Pf03321	84514	ENSG00000167925	GHDC	B4DQS4; E9PDB5; hsa:84514; Q8N2G8; Q9BXM6	Neutrophil degranulation		1	0	0.848	1.184	0.805	0.589	0.5	0.697	0.741	0.408	0.467	0.417	0.406	0.503	0.419	0.585	0.467	1.395	0.949	0.695	0.59	0.821	0.873	0.481
High	Master Protein	P48426	Phosphatidylinositol 5-phosphate 4-kinase type-2 alpha OS=Homo sapiens OX=9606 GN=PIP4K2A PE=1 SV=2	0	FALSE	13.253	9	4	7	2	406	46.2	6.99	15.36	4	cell organization and biogenesis;other metabolic processes;transport;developmental processes;other biological processes	plasma membrane;other membranes;cytosol;nucleus;other cytoplasmic organelle;other cell component	kinase activity;other molecular function	Pf01504	5305	ENSG00000150867	PIP4K2A	B0YJ66; B4DGX2; D3DRV1; hsa:5305; P48426; P53807; Q5VUX3	PI5P, PP2A and IER3 Regulate PI3K/AKT Signaling; Synthesis of PIPs at the plasma membrane; PI5P Regulates TP53 Acetylation; Synthesis of PIPs in the nucleus	Regulation of actin cytoskeleton; G13 signaling pathway	6	0	0.869	0.587	0.896	2.404	1.124	1.133	1.156	2.04	2.122	2.604	1.991	1.433	1.581	1.378	1.095	0.675	1.031	2.766	1.293	1.304	1.33	2.347
High	Master Protein	Q8N573	Oxidation resistance protein 1 OS=Homo sapiens OX=9606 GN=OXR1 PE=1 SV=2	0	FALSE	13.304	8	3	3	3	874	97.9	5.47	7.66	3	stress response;other biological processes	mitochondrion;nucleus	other molecular function	Pf01476, Pf07534	55074	ENSG00000164830	OXR1	A6NK11; A8KA34; B3KXL1; B7Z402; B7Z8N5; D3HIS6; hsa:55074; Q3LIB5; Q6ZVK9; Q8N573; Q8N8V0; Q9H266; Q9NWC7			0	0	1.39	0.98	1.394	0.739	1.046	1.199	1.308	3.314	3.168	3.876	3.983	2.655	2.141	2.717	2.4	0.705	1.003	0.531	0.753	0.862	0.941	2.384
High	Master Protein	J3KPD3	RNA binding motif protein 7, isoform CRA_c OS=Homo sapiens OX=9606 GN=RBM7 PE=1 SV=1	0	FALSE	11.589	20	5	5	5	267	30.6	9.57	10.83	5		nucleus	nucleic acid binding activity	Pf00076	10179	ENSG00000076053	RBM7	J3KPD3			0	0	1.208	1.105	1.111	1.129	0.915	0.853	0.957	1.807	1.453	1.662	1.736	1.794	1.568	1.356	1.59	0.915	0.92	0.935	0.758	0.706	0.792	1.496
High	Master Protein	Q12906	Interleukin enhancer-binding factor 3 OS=Homo sapiens OX=9606 GN=ILF3 PE=1 SV=3	0	FALSE	191.211	51	30	99	27	894	95.3	8.76	307.67	30	protein metabolism;other metabolic processes;stress response;other biological processes	mitochondrion;nucleus;other cell component	nucleic acid binding activity	Pf00035, Pf07528	3609	ENSG00000129351	ILF3	A8K6F2; G5E9M5; hsa:3609; O43409; Q12906; Q6P1X1; Q86XY7; Q99544; Q99545; Q9BZH4; Q9BZH5; Q9NQ95; Q9NQ96; Q9NQ97; Q9NQ98; Q9NQ99; Q9NQA0; Q9NQA1; Q9NQA2; Q9NRN2; Q9NRN3; Q9NRN4; Q9UMZ9; Q9UN00; Q9UN84; Q9UNA2			0	3	1.099	1.088	0.942	0.946	0.819	0.782	0.741	1.159	0.914	1.174	1.084	1.388	1.238	1.131	1.181	0.99	0.857	0.861	0.746	0.711	0.674	1.055
High	Master Protein	P78417	Glutathione S-transferase omega-1 OS=Homo sapiens OX=9606 GN=GSTO1 PE=1 SV=2	0	FALSE	22.606	32	8	15	8	241	27.5	6.6	36.71	8	other metabolic processes;signal transduction;other biological processes	cytosol;nucleus;other cell component	other molecular function	Pf13417, Pf14497	9446	ENSG00000148834	GSTO1	D3DRA3; F5H7H0; hsa:9446; P78417; Q5TA03; Q7Z3T2	Gene and protein expression by JAK-STAT signaling after Interleukin-12 stimulation; Glutathione conjugation; Vitamin C (ascorbate) metabolism; Methylation	Myometrial relaxation and contraction pathways; Metapathway biotransformation Phase I and II	6	0	0.97	1.016	0.961	0.778	1.262	1.288	1.319	1.695	1.819	1.685	1.628	1.178	1.264	1.342	1.179	1.047	0.991	0.802	1.301	1.328	1.36	1.748
High	Master Protein	S4R3N6	Allergin-1 (Fragment) OS=Homo sapiens OX=9606 GN=MILR1 PE=1 SV=1	0.001	FALSE	4.122	11	1	1	1	89	10	4.84	2.29	1	transport;other biological processes					ENSG00000271605	MILR1	S4R3N6			0	0
High	Master Protein	A0A024RCQ8	HCG1999928, isoform CRA_a OS=Homo sapiens OX=9606 GN=PPT2 PE=1 SV=1	0.003	FALSE	2.816	3	1	1	1	302	34.3	6.33	2.29	1	other metabolic processes	other cytoplasmic organelle	other molecular function	Pf02089		ENSG00000168452; ENSG00000206329; ENSG00000227600; ENSG00000231618; ENSG00000236649	PPT2	A0A024RCQ8			0	0
Medium	Master Protein	O94868	F-BAR and double SH3 domains protein 2 OS=Homo sapiens OX=9606 GN=FCHSD2 PE=1 SV=3	0.012	FALSE	2.011	4	1	1	1	740	84.2	5.77	2.68	1	cell-cell signaling;cell organization and biogenesis;transport	plasma membrane;other membranes;other cytoplasmic organelle;other cell component	other molecular function	Pf00018, Pf00611, Pf14604	9873	ENSG00000137478	FCHSD2	B4DNI3; hsa:9873; O94868; Q7L8J9; Q8WVM2; Q96FV7; Q9UF77			0	0
High	Master Protein	P33947	ER lumen protein-retaining receptor 2 OS=Homo sapiens OX=9606 GN=KDELR2 PE=1 SV=1	0	FALSE	26.1	38	7	17	3	212	24.4	8.72	45.91	7	transport;other biological processes	other membranes;ER/Golgi	other molecular function	Pf00810	11014	ENSG00000136240	KDELR2	A4D2P4; hsa:11014; P33947; Q6IPC5; Q96E30	COPI-dependent Golgi-to-ER retrograde traffic; COPI-mediated anterograde transport		2	3	1.004	0.917	0.893	0.719	0.856	0.85	0.855	0.607	0.473	0.704	0.55	0.717	0.705	0.681	0.696	0.913	0.889	0.716	0.852	0.846	0.851	0.604
High	Master Protein	Q6PGP7	Tetratricopeptide repeat protein 37 OS=Homo sapiens OX=9606 GN=TTC37 PE=1 SV=1	0	FALSE	75.797	18	25	34	25	1564	175.4	7.53	89.61	25	RNA metabolism OR transcription;other metabolic processes	cytosol;nucleus;other cell component		Pf13181, Pf13432	9652	ENSG00000198677	TTC37	hsa:9652; O15077; Q6PGP7; Q6PJI3	mRNA decay by 3' to 5' exoribonuclease		1	0	1.072	1.077	1.034	0.876	1.026	1.022	0.904	1.752	1.792	1.806	1.847	1.452	1.424	1.476	1.472	1.004	0.965	0.817	0.956	0.953	0.843	1.634
High	Master Protein	A0A087WYI0	Integrator complex subunit 11 OS=Homo sapiens OX=9606 GN=INTS11 PE=1 SV=1	0	FALSE	7.719	5	2	2	2	502	56.3	8.9	6.14	2		cytosol;nucleus		Pf07521, Pf10996, Pf16661	54973	ENSG00000127054	INTS11	A0A087WYI0			0	0
High	Master Protein	P48556	26S proteasome non-ATPase regulatory subunit 8 OS=Homo sapiens OX=9606 GN=PSMD8 PE=1 SV=2	0	FALSE	10.231	22	5	10	5	350	39.6	9.7	20.48	5	cell-cell signaling;cell organization and biogenesis;protein metabolism;other metabolic processes;stress response;transport;signal transduction;other biological processes	cytosol;nucleus;other cell component		Pf10075	5714	ENSG00000099341	PSMD8	B4DX18; hsa:5714; P48556; Q6P1L7	Asymmetric localization of PCP proteins; Degradation of DVL; ER-Phagosome pathway; Regulation of expression of SLITs and ROBOs; MAPK6/MAPK4 signaling; Separation of Sister Chromatids; The role of GTSE1 in G2/M progression after G2 checkpoint; RUNX1 regulates transcription of genes involved in differentiation of HSCs; Cdc20:Phospho-APC/C mediated degradation of Cyclin A; Ub-specific processing pro…	Proteasome degradation; Alzheimer's disease and miRNA effects; Parkin-ubiquitin proteasomal system pathway; Ciliary landscape; Alzheimer's disease	62	0	1.244	1.445	1.383	1.334	1.357	1.26	1.566	2.145	1.614	2.017	1.814	1.475	1.683	1.389	1.539	1.161	1.111	1.072	1.09	1.013	1.259	1.724
High	Master Protein	Q9HCK8	Chromodomain-helicase-DNA-binding protein 8 OS=Homo sapiens OX=9606 GN=CHD8 PE=1 SV=5	0	FALSE	105.487	15	29	44	24	2581	290.3	6.47	108.93	29	cell-cell signaling;cell organization and biogenesis;developmental processes;signal transduction;other biological processes	nucleus;other cell component	nucleic acid binding activity;other molecular function	Pf00176, Pf00271, Pf00385, Pf07533	57680	ENSG00000100888	CHD8	hsa:57680; Q4G0D8; Q68DQ0; Q6DKH9; Q6P440; Q6ZNL7; Q8N3Z9; Q8NCY4; Q8TBR9; Q96F26; Q9HCK8	Deactivation of the beta-catenin transactivating complex	lncRNA in canonical Wnt signaling and colorectal cancer; Wnt signaling; ncRNAs involved in Wnt signaling in hepatocellular carcinoma; Malignant pleural mesothelioma	5	1	1.015	1.096	1.123	0.697	0.641	0.652	0.651	0.912	0.938	0.821	0.865	1.179	1.185	0.9	1.189	1.081	1.107	0.687	0.632	0.643	0.642	0.899
High	Master Protein	Q8IWJ2	GRIP and coiled-coil domain-containing protein 2 OS=Homo sapiens OX=9606 GN=GCC2 PE=1 SV=4	0	FALSE	84.84	16	22	34	22	1684	195.8	5.14	95.42	22	cell organization and biogenesis;transport;other biological processes	cytosol;ER/Golgi;nucleus	other molecular function	Pf01465, Pf16704	9648	ENSG00000135968	GCC2	A6H8X8; hsa:9648; O15045; Q4ZG46; Q8IWJ2; Q8TDH3; Q9H2G8	Signaling by ALK fusions and activated point mutants; Retrograde transport at the Trans-Golgi-Network	Deregulation of Rab and Rab effector genes in bladder cancer	3	0	0.974	1.106	1.302	0.789	1.126	1.023	1.141	0.971	0.863	0.949	0.977	1.013	0.858	1.098	1.173	1.135	1.336	0.809	1.156	1.05	1.17	0.996
High	Master Protein	E9PN63	Putative protein N-methyltransferase FAM86B1 OS=Homo sapiens OX=9606 GN=FAM86B1 PE=4 SV=1	0	FALSE	5.311	9	2	2	2	330	36.8	6.28	4.5	2	other metabolic processes		other molecular function	Pf10294, Pf14904	85002	ENSG00000186523	FAM86B1	E9PN63			0	0
High	Master Protein	O75449	Katanin p60 ATPase-containing subunit A1 OS=Homo sapiens OX=9606 GN=KATNA1 PE=1 SV=1	0	FALSE	13.812	10	4	6	3	491	55.9	6.9	17.38	4	cell cycle OR cell proliferation;cell organization and biogenesis;other biological processes	cytoskeleton;nucleus;other cell component	cytoskeletal activity;other molecular function	Pf00004, Pf09336, Pf17862	11104	ENSG00000186625	KATNA1	E1P5A3; hsa:11104; O75449; Q5TFA8; Q5TFA9; Q86VN2; Q9NU52			0	0
High	Master Protein	P54578	Ubiquitin carboxyl-terminal hydrolase 14 OS=Homo sapiens OX=9606 GN=USP14 PE=1 SV=3	0	FALSE	98.456	45	18	37	18	494	56	5.3	111.08	18	protein metabolism;other metabolic processes;stress response;other biological processes	plasma membrane;other membranes;cytosol;nucleus;other cell component	enzyme regulator activity;other molecular function	Pf00443	9097	ENSG00000101557	USP14	B7Z4N8; hsa:9097; J3QRZ5; P54578; Q53XY5	Ub-specific processing proteases		1	0	1.098	0.998	0.977	0.596	0.919	0.932	0.95	2.08	1.693	2.301	1.997	1.163	1.124	1.062	0.88	0.909	0.89	0.543	0.837	0.849	0.865	1.894
High	Master Protein	P07305	Histone H1.0 OS=Homo sapiens OX=9606 GN=H1-0 PE=1 SV=3	0	FALSE	21.753	24	4	11	4	194	20.9	10.84	26.52	4	cell organization and biogenesis;DNA metabolism;other metabolic processes;other biological processes	cytoskeleton;ER/Golgi;nucleus;other cell component	nucleic acid binding activity	Pf00538	3005	ENSG00000189060	H1-0	B2R6I0; B4DRD6; hsa:3005; P07305; Q6FG88; Q8N6R3	Apoptosis induced DNA fragmentation; Formation of Senescence-Associated Heterochromatin Foci (SAHF)		2	0	1.144	1.171	2.306	0.682	0.982	1.042	0.72	0.821	0.66	0.757	0.79	1.083	0.934	0.582	1.067	1.024	2.016	0.597	0.859	0.911	0.629	0.718
High	Master Protein	O14936	Peripheral plasma membrane protein CASK OS=Homo sapiens OX=9606 GN=CASK PE=1 SV=3	0	FALSE	44.578	18	13	19	13	926	105.1	6.43	45.25	13	cell adhesion;protein metabolism;other metabolic processes;transport;other biological processes	extracellular matrix;plasma membrane;other membranes;cytosol;cytoskeleton;nucleus;other cell component	kinase activity;other molecular function	Pf00018, Pf00069, Pf00595, Pf00625, Pf02828	8573	ENSG00000147044	CASK	A6NES1; B7ZKY0; hsa:8573; O14936; O43215; Q17RI4; Q59HA0; Q5VT16; Q5VT17; Q5VT18; Q5VT19; Q66T42; Q9BYH6; Q9NYB2; Q9NYB3	Sensory processing of sound by inner hair cells of the cochlea; Sensory processing of sound by outer hair cells of the cochlea; Assembly and cell surface presentation of NMDA receptors; Nephrin family interactions; Neurexins and neuroligins; Dopamine Neurotransmitter Release Cycle; Syndecan interactions	Parkin-ubiquitin proteasomal system pathway; Splicing factor NOVA regulated synaptic proteins	9	0	0.99	0.905	1.047	1.068	0.998	0.994	0.916	0.827	0.924	0.859	0.851	0.8	0.904	0.898	0.783	0.915	1.058	1.079	1.008	1.005	0.926	0.835
High	Master Protein	Q5T4U5	Acyl-Coenzyme A dehydrogenase, C-4 to C-12 straight chain, isoform CRA_a OS=Homo sapiens OX=9606 GN=ACADM PE=1 SV=1	0	FALSE	65.991	37	16	42	16	454	50.2	7.8	119.38	16	other metabolic processes;stress response;developmental processes;other biological processes	mitochondrion	other molecular function	Pf00441, Pf02770, Pf02771	34	ENSG00000117054	ACADM	Q5T4U5		Fatty acid beta-oxidation; PPAR-alpha pathway; Nuclear receptors meta-pathway; Mitochondrial long chain fatty acid beta-oxidation; Amino acid metabolism; PPAR signaling pathway; Sudden infant death syndrome (SIDS) susceptibility pathways	7	0	0.734	0.901	0.727	0.823	0.74	0.787	0.794	0.418	0.557	0.491	0.509	0.413	0.588	0.459	0.575	1.228	0.992	1.122	1.009	1.073	1.083	0.569
High	Master Protein	Q9UPW6	DNA-binding protein SATB2 OS=Homo sapiens OX=9606 GN=SATB2 PE=1 SV=2	0	FALSE	12.068	7	4	4	3	733	82.5	6.9	11.27	4	cell organization and biogenesis;developmental processes;other biological processes	nucleus;other cell component	nucleic acid binding activity;other molecular function	Pf00046, Pf02376, Pf16534, Pf16557	23314	ENSG00000119042	SATB2	A8K5Z8; hsa:23314; Q3ZB87; Q4V763; Q9UPW6	SUMOylation of chromatin organization proteins; RUNX2 regulates osteoblast differentiation	Rett syndrome causing genes; Transcription co-factors SKI and SKIL protein partners	4	0
High	Master Protein	P23368	NAD-dependent malic enzyme, mitochondrial OS=Homo sapiens OX=9606 GN=ME2 PE=1 SV=1	0	FALSE	79.017	37	15	40	15	584	65.4	7.61	124.04	15	other metabolic processes;other biological processes	mitochondrion;other cell component	other molecular function	Pf00390, Pf03949	4200	ENSG00000082212	ME2	B2R8J2; hsa:4200; P23368; Q9BWL6; Q9BYG1; Q9H4B2	Citric acid cycle (TCA cycle)	TCA cycle in senescence	2	0	0.739	0.952	0.754	1.453	1.415	1.548	1.56	0.679	0.832	0.802	0.791	0.619	0.831	0.697	0.894	1.287	1.02	1.965	1.914	2.094	2.11	0.919
High	Master Protein	A0A087X0N2	Leptin receptor gene-related protein OS=Homo sapiens OX=9606 GN=LEPROT PE=1 SV=1	0.001	FALSE	3.784	9	1	2	1	140	15.4	6.51	5.91	1		other membranes		Pf04133	54741	ENSG00000213625	LEPROT	A0A087X0N2			0	0
Medium	Master Protein	P48740	Mannan-binding lectin serine protease 1 OS=Homo sapiens OX=9606 GN=MASP1 PE=1 SV=3	0.015	FALSE	1.877	3	1	1	1	699	79.2	5.49	2.37	1	protein metabolism;stress response;transport;other biological processes	non-structural extracellular;cytosol;nucleus	other molecular function	Pf00084, Pf00089, Pf00431	5648	ENSG00000127241	MASP1	A8K542; A8K6M1; B4E2L7; hsa:5648; O95570; P48740; Q68D21; Q8IUV8; Q96RS4; Q9UF09	Scavenging by Class A Receptors; Initial triggering of complement; Ficolins bind to repetitive carbohydrate structures on the target cell surface	Complement system; Complement system in neuronal development and plasticity; Complement activation; Complement and coagulation cascades	8	0
High	Master Protein	Q15768	Ephrin-B3 OS=Homo sapiens OX=9606 GN=EFNB3 PE=1 SV=1	0.002	FALSE	2.952	4	1	2	1	340	35.8	8.6	1.82	1	cell-cell signaling;cell organization and biogenesis;protein metabolism;other metabolic processes;developmental processes;signal transduction;other biological processes	plasma membrane;other membranes;other cell component	signal transduction activity or receptor binding;kinase activity;other molecular function	Pf00812	1949	ENSG00000108947	EFNB3	B2RBW2; D3DTQ6; hsa:1949; O00680; Q15768; Q8TBH7; Q92875	EPHB-mediated forward signaling; Ephrin signaling; EPH-ephrin mediated repulsion of cells	Cell migration and invasion through p75NTR	5	0
High	Master Protein	Q9UKJ5	Cysteine-rich hydrophobic domain-containing protein 2 OS=Homo sapiens OX=9606 GN=CHIC2 PE=1 SV=1	0.006	FALSE	2.398	5	1	2	1	165	19.2	6.73	5.1	1		plasma membrane;other membranes;ER/Golgi;other cell component		Pf10256	26511	ENSG00000109220	CHIC2	B2R639; hsa:26511; Q9UKJ5			0	0	0.728	0.784	0.885	0.714	0.873	1.119	0.936	0.668	0.94	0.72	0.695	0.756	1.144	0.872	0.986	1.077	1.216	0.981	1.2	1.538	1.287	0.918
High	Master Protein	Q86W33	Transmembrane protein adipocyte-associated 1 OS=Homo sapiens OX=9606 GN=TPRA1 PE=1 SV=1	0.001	FALSE	4.526	6	1	3	1	373	41	6.06	8.28	1	other metabolic processes;developmental processes;signal transduction;other biological processes	other membranes	other molecular function	Pf10160	131601	ENSG00000163870	TPRA1	A8MVB8; D3DNA9; hsa:131601; Q86W33; Q8WZ24; Q96AJ6; Q9P2R4			0	0
High	Master Protein	D6RIU2	Claudin domain-containing protein 1 (Fragment) OS=Homo sapiens OX=9606 GN=CLDND1 PE=1 SV=1	0	FALSE	18.265	42	5	11	5	138	16	4.94	30.59	5		other membranes				ENSG00000080822	CLDND1	D6RIU2			0	0	0.972	0.946	1.047	0.946	0.825	0.862	0.844	0.813	0.928	0.871	0.862	1.012	1.097	1.252	1.075	0.974	1.077	0.973	0.849	0.887	0.868	0.836
High	Master Protein	A0A182DWF2	Thioredoxin reductase 2, mitochondrial OS=Homo sapiens OX=9606 GN=TXNRD2 PE=1 SV=1	0	FALSE	32.515	27	8	16	8	494	53.5	6.52	40.7	8	other biological processes	cytosol;mitochondrion;other cell component	other molecular function	Pf02852, Pf07992		ENSG00000184470	TXNRD2	A0A182DWF2		22q11.2 copy number variation syndrome	1	0	0.662	0.852	0.824	1.658	1.646	1.915	1.724	0.852	1.246	1.165	1.181	1.037	1.551	1.233	1.498	1.286	1.244	2.502	2.485	2.89	2.603	1.286
High	Master Protein	A0A0A0MSL5	G patch domain and ankyrin repeat-containing protein 1 (Fragment) OS=Homo sapiens OX=9606 GN=GPANK1 PE=1 SV=6	0.003	FALSE	2.864	24	1	1	1	89	9.7	6.77	0	1						ENSG00000204438; ENSG00000223932; ENSG00000232312; ENSG00000233210	GPANK1	A0A0A0MSL5			0	0
High	Master Protein	Q13888	General transcription factor IIH subunit 2 OS=Homo sapiens OX=9606 GN=GTF2H2 PE=1 SV=1	0.002	FALSE	3.496	4	2	2	2	395	44.4	6.76	4.73	2	cell organization and biogenesis;DNA metabolism;RNA metabolism OR transcription;other metabolic processes;stress response;transport;other biological processes	nucleus	other molecular function	Pf04056, Pf07975	2966	ENSG00000145736; ENSG00000275045; ENSG00000276910	GTF2H2	hsa:2966; Q13888; Q15570; Q15571; Q9BS41	Formation of RNA Pol II elongation complex ; Formation of HIV elongation complex in the absence of HIV Tat; Formation of HIV-1 elongation complex containing HIV-1 Tat; RNA Polymerase II Pre-transcription Events; TP53 Regulates Transcription of DNA Repair Genes; Formation of the Early Elongation Complex; Formation of the HIV-1 Early Elongation Complex; RNA Pol II CTD phosphorylation and interactio…	Eukaryotic transcription initiation; Nucleotide excision repair; DNA repair pathways, full network; Nucleotide excision repair in xeroderma pigmentosum	33	0	1.08	1.012	1.039	1.03	0.692	0.82	0.886	1.656	1.592	1.68	1.686	2.017	1.753	1.8	1.947	0.937	0.962	0.954	0.641	0.759	0.82	1.533
High	Master Protein	Q969J2	Zinc finger protein with KRAB and SCAN domains 4 OS=Homo sapiens OX=9606 GN=ZKSCAN4 PE=1 SV=1	0	FALSE	11.249	3	1	3	1	545	61.5	7.61	8.86	1	other biological processes	nucleus	nucleic acid binding activity;other molecular function	Pf00096, Pf01352, Pf02023	387032	ENSG00000187626	ZKSCAN4	B2RE32; hsa:387032; Q5U7L4; Q969J2	Generic Transcription Pathway		1	0
High	Master Protein	Q14807	Kinesin-like protein KIF22 OS=Homo sapiens OX=9606 GN=KIF22 PE=1 SV=5	0	FALSE	14.958	9	4	5	4	665	73.2	9.45	16.75	4	cell cycle OR cell proliferation;cell organization and biogenesis;DNA metabolism;other metabolic processes;stress response;transport;other biological processes	cytosol;cytoskeleton;nucleus;other cell component	cytoskeletal activity;nucleic acid binding activity;other molecular function	Pf00225, Pf12836	3835	ENSG00000079616	KIF22	B2R5M0; B7Z265; hsa:3835; O60845; O94814; Q14807; Q53F58; Q9BT46	COPI-dependent Golgi-to-ER retrograde traffic; MHC class II antigen presentation; Kinesins	16p11.2 proximal deletion syndrome	4	0	1.37	1.065	1.315	1.132	0.839	0.886	0.684	1.6	1.541	1.56	1.278	1.638	1.457	0.871	1.31	0.777	0.96	0.827	0.612	0.647	0.499	1.168
High	Master Protein	F6U1T9	Calcineurin subunit B type 1 OS=Homo sapiens OX=9606 GN=PPP3R1 PE=1 SV=1	0	FALSE	9.855	41	4	6	4	160	18.2	4.92	15.7	4			enzyme regulator activity;other molecular function	Pf13499		ENSG00000221823	PPP3R1	F6U1T9		Alzheimer's disease and miRNA effects; Initiation of transcription and translation elongation at the HIV-1 LTR; Wnt signaling; Regucalcin in proximal tubule epithelial kidney cells; Alzheimer's disease	5	0	0.675	0.8	0.943	0.717	1.005	0.917	0.765	0.716	0.826	0.748	0.787	0.798	0.77	0.753	0.748	1.186	1.398	1.064	1.49	1.36	1.134	1.061
Medium	Master Protein	A0A1W2PPE6	Uncharacterized protein OS=Homo sapiens OX=9606 PE=1 SV=1	0.013	FALSE	1.947	5	1	1	1	299	33.3	9.1	0	1	transport	other membranes;ER/Golgi	transporter activity	Pf04142							0	0	1.386	1.797	1.588	0.982	1.302	1.152	1.31	0.977	0.773	0.998	1.135	1.279	1.471	1.303	1.65	1.296	1.146	0.709	0.94	0.831	0.945	0.705
High	Master Protein	Q01432	AMP deaminase 3 OS=Homo sapiens OX=9606 GN=AMPD3 PE=1 SV=1	0	FALSE	11.719	5	4	5	3	767	88.8	6.98	12.35	4	other metabolic processes;transport	non-structural extracellular;cytosol;other cell component	other molecular function	Pf19326	272	ENSG00000133805	AMPD3	A0AUX0; B7Z2S2; B7Z763; B7Z877; hsa:272; Q01432	Neutrophil degranulation; Purine salvage		2	0	1.048	1.124	1.334	0.804	1.673	1.754	1.913	1.667	1.354	1.378	1.352	1.916	2.479	2.025	2.365	1.072	1.273	0.767	1.597	1.673	1.825	1.591
High	Master Protein	E7ETU9	Procollagen-lysine,2-oxoglutarate 5-dioxygenase 2 OS=Homo sapiens OX=9606 GN=PLOD2 PE=1 SV=1	0	FALSE	128.308	44	23	56	2	703	81.1	6.65	178.1	23		other membranes;ER/Golgi	other molecular function	Pf03171		ENSG00000152952	PLOD2	E7ETU9		Clear cell renal cell carcinoma pathways; Type I collagen synthesis in the context of osteogenesis imperfecta	2	18	0.911	0.833	0.802	0.943	1.022	1.152	0.959	0.409	0.489	0.454	0.465	0.818	1.09	0.966	1.221	0.915	0.88	1.035	1.122	1.264	1.053	0.449
High	Master Protein	P84243	Histone H3.3 OS=Homo sapiens OX=9606 GN=H3-3A PE=1 SV=2	0	FALSE	17.051	47	5	22	2	136	15.3	11.27	44.07	5	cell cycle OR cell proliferation;cell organization and biogenesis;protein metabolism;other metabolic processes;stress response;developmental processes;other biological processes	non-structural extracellular;nucleus;other cell component	nucleic acid binding activity;other molecular function	Pf00125	3020; 3021	ENSG00000132475; ENSG00000163041	H3-3A; H3-3B	hsa:3020; hsa:3021; P06351; P33155; P84243; Q5VV55; Q5VV56; Q66I33; Q9V3W4	Factors involved in megakaryocyte development and platelet production; Oxidative Stress Induced Senescence; Activation of anterior HOX genes in hindbrain development during early embryogenesis; Estrogen-dependent gene expression; Pre-NOTCH Transcription and Translation; Senescence-Associated Secretory Phenotype (SASP); RUNX1 regulates transcription of genes involved in differentiation of HSCs; RU…	Gastric cancer network 1; Histone modifications; Tumor suppressor activity of SMARCB1; Ciliary landscape; FBXL10 enhancement of MAP/ERK signaling in diffuse large B-cell lymphoma	31	3	1.318	1.12	1.414	1.029	0.855	0.753	0.828	0.887	0.776	0.659	0.985	0.92	0.71	0.559	0.672	0.85	1.073	0.781	0.649	0.571	0.629	0.673
High	Master Protein	C9J7I2	VPS35 endosomal protein sorting factor-like OS=Homo sapiens OX=9606 GN=VPS35L PE=1 SV=2	0	FALSE	9.709	4	3	3	3	813	93	7.05	7.13	3	transport	other cytoplasmic organelle				ENSG00000103544	VPS35L	C9J7I2			0	0
High	Master Protein	A6XND1	Insulin-like growth factor binding protein 3 isoform b OS=Homo sapiens OX=9606 GN=IGFBP3 PE=1 SV=1	0	FALSE	8.923	10	2	2	2	263	29	8.46	6.38	2		non-structural extracellular	other molecular function	Pf00086, Pf00219		ENSG00000146674	IGFBP3	A6XND1		16p11.2 proximal deletion syndrome	1	0	1.183	0.482	1.239	0.997	1.505	2.059	1.628	1.242	1.443	1.033	1.283	0.435	0.696	0.782	0.559	0.407	1.047	0.842	1.272	1.74	1.376	1.05
High	Master Protein	Q99961	Endophilin-A2 OS=Homo sapiens OX=9606 GN=SH3GL1 PE=1 SV=1	0	FALSE	46.089	39	10	24	7	368	41.5	5.43	69.34	10	cell organization and biogenesis;transport;developmental processes;signal transduction;other biological processes	other membranes;cytosol;cytoskeleton;other cytoplasmic organelle;other cell component	signal transduction activity or receptor binding;other molecular function	Pf00018, Pf03114	6455	ENSG00000141985	SH3GL1	B4DRA1; E7EVZ4; hsa:6455; M0QZV5; Q99668; Q99961	Cargo recognition for clathrin-mediated endocytosis; EGFR downregulation; Negative regulation of MET activity; InlB-mediated entry of Listeria monocytogenes into host cell	Fragile X syndrome	6	1	1.098	1.178	1.037	0.983	1.056	1.053	1.029	1.493	1.525	1.553	1.502	1.511	1.473	1.446	1.363	1.073	0.944	0.895	0.962	0.959	0.938	1.36
Medium	Master Protein	P53803	DNA-directed RNA polymerases I, II, and III subunit RPABC4 OS=Homo sapiens OX=9606 GN=POLR2K PE=1 SV=1	0.037	FALSE	1.381	12	1	1	1	58	7	9.06	0	1	DNA metabolism;RNA metabolism OR transcription;other metabolic processes;stress response;signal transduction;other biological processes	cytosol;nucleus	nucleic acid binding activity;other molecular function	Pf03604	5440	ENSG00000147669	POLR2K	hsa:5440; P53803; Q6IBD4	Formation of RNA Pol II elongation complex ; Formation of HIV elongation complex in the absence of HIV Tat; Formation of HIV-1 elongation complex containing HIV-1 Tat; Pausing and recovery of Tat-mediated HIV elongation; Tat-mediated HIV elongation arrest and recovery; HIV elongation arrest and recovery; Pausing and recovery of HIV elongation; RNA Polymerase II Pre-transcription Events; TP53 Regu…	Pyrimidine metabolism; Eukaryotic transcription initiation; Cytosolic DNA-sensing pathway	56	0
High	Master Protein	A0A0U1RQX8	E3 ubiquitin-protein ligase CBL OS=Homo sapiens OX=9606 GN=CBL PE=1 SV=1	0	FALSE	29.083	17	9	12	9	882	96.8	6.71	31.26	9	protein metabolism;other metabolic processes;signal transduction;other biological processes	other cell component	other molecular function	Pf02262, Pf02761, Pf02762, Pf14447		ENSG00000110395	CBL	A0A0U1RQX8		Glioblastoma signaling pathways; Physico-chemical features and toxicity-associated pathways; T-cell antigen receptor (TCR) pathway during Staphylococcus aureus infection	3	0	1.013	0.905	0.836	0.98	0.833	0.965	0.916	1.348	1.414	1.517	1.271	1.2	1.117	1.104	1.076	0.893	0.825	0.967	0.822	0.952	0.904	1.331
High	Master Protein	Q86UL3	Glycerol-3-phosphate acyltransferase 4 OS=Homo sapiens OX=9606 GN=GPAT4 PE=1 SV=1	0	FALSE	24.298	15	6	13	5	456	52	9.19	31.01	6	other metabolic processes;transport;developmental processes;other biological processes	other membranes;ER/Golgi	other molecular function	Pf01553	137964	ENSG00000158669	GPAT4	hsa:137964; Q2TU73; Q86UL3; Q86V89	Synthesis of PA	Glycerolipids and glycerophospholipids; IL-18 signaling pathway	3	1	0.938	0.902	0.994	0.853	0.807	0.722	0.705	0.496	0.453	0.47	0.475	0.693	0.698	0.677	0.687	0.961	1.06	0.909	0.86	0.769	0.751	0.529
High	Master Protein	Q9NZV1	Cysteine-rich motor neuron 1 protein OS=Homo sapiens OX=9606 GN=CRIM1 PE=1 SV=1	0	FALSE	48.391	14	11	21	11	1036	113.7	5.21	61.29	11	protein metabolism;other metabolic processes;developmental processes;signal transduction;other biological processes	non-structural extracellular;plasma membrane;other membranes	enzyme regulator activity;kinase activity;other molecular function	Pf00093, Pf00219, Pf02822, Pf19442	51232	ENSG00000150938	CRIM1	hsa:51232; Q2M2G4; Q59GH0; Q7LCQ5; Q9H318; Q9NZV1		Development of ureteric collection system	1	0	0.983	0.988	0.589	1.049	0.682	0.742	0.846	0.385	0.436	0.46	0.398	0.439	0.461	0.503	0.47	1.005	0.599	1.067	0.694	0.755	0.86	0.391
High	Master Protein	P21912	Succinate dehydrogenase [ubiquinone] iron-sulfur subunit, mitochondrial OS=Homo sapiens OX=9606 GN=SDHB PE=1 SV=3	0	FALSE	36.391	28	9	18	4	280	31.6	8.76	45.36	9	other metabolic processes	plasma membrane;other membranes;mitochondrion;nucleus	other molecular function	Pf13085, Pf13534	6390	ENSG00000117118	SDHB	B2R545; hsa:6390; P21912; Q0QEY7; Q9NQ12	Respiratory electron transport; Citric acid cycle (TCA cycle)	Electron transport chain: OXPHOS system in mitochondria; Metabolic reprogramming in colon cancer; Nonalcoholic fatty liver disease; Mitochondrial complex II assembly; TCA cycle (aka Krebs or citric acid cycle)	7	4	1.001	1.099	0.875	0.622	0.599	0.582	0.547	0.038	0.049	0.021	0.032	0.029	0.033	0.021	0.02	1.098	0.874	0.622	0.598	0.582	0.547	0.038
High	Master Protein	Q96CQ1	Solute carrier family 25 member 36 OS=Homo sapiens OX=9606 GN=SLC25A36 PE=1 SV=1	0	FALSE	10.187	15	3	4	2	311	34.3	8.57	10.23	3	cell organization and biogenesis;transport;other biological processes	other membranes;mitochondrion	transporter activity	Pf00153	55186	ENSG00000114120	SLC25A36	A8MYF7; hsa:55186; Q05CY1; Q96CQ1; Q9H0G8; Q9NVN5			0	0
High	Master Protein	H0Y9X1	Translation machinery-associated protein 16 (Fragment) OS=Homo sapiens OX=9606 GN=TMA16 PE=1 SV=1	0	FALSE	28.611	41	7	11	7	242	27.7	9.57	27.96	7		nucleus		Pf11176		ENSG00000198498	TMA16	H0Y9X1			0	0	1.07	1.005	1.03	1.019	0.939	0.856	0.865	0.835	0.833	0.76	0.866	1.003	0.962	0.96	1	0.939	0.962	0.952	0.877	0.8	0.808	0.78
High	Master Protein	Q92478	C-type lectin domain family 2 member B OS=Homo sapiens OX=9606 GN=CLEC2B PE=1 SV=2	0	FALSE	13.863	19	2	3	2	149	17.3	8.75	9.74	2	other biological processes	plasma membrane;other membranes	other molecular function	Pf00059	9976	ENSG00000110852	CLEC2B	B2R9U1; hsa:9976; Q8IZE9; Q92478; Q9BS74; Q9UQB4	Immunoregulatory interactions between a Lymphoid and a non-Lymphoid cell		1	0	1.065	0.896	0.801	0.777	0.926	0.885	1.016	0.363	0.391	0.332	0.387	0.947	1.03	1.17	1.088	0.841	0.753	0.73	0.87	0.831	0.955	0.341
High	Master Protein	Q5T073	Lysosomal acid lipase/cholesteryl ester hydrolase (Fragment) OS=Homo sapiens OX=9606 GN=LIPA PE=1 SV=1	0.001	FALSE	3.604	3	1	1	1	290	32.3	7.03	3.47	1		cytosol;nucleus;other cell component		Pf00561		ENSG00000107798	LIPA	Q5T073		Phase I biotransformations, non P450	1	0	0.885	0.819	1.065	1.043	0.844	0.782	1.147	0.672	0.705	0.568	0.642	0.508	0.602	0.604	0.635	0.925	1.204	1.179	0.955	0.884	1.296	0.76
High	Master Protein	P20020	Plasma membrane calcium-transporting ATPase 1 OS=Homo sapiens OX=9606 GN=ATP2B1 PE=1 SV=4	0	FALSE	175.905	34	33	82	22	1220	134.6	5.91	244.64	33	stress response;transport;developmental processes;other biological processes	plasma membrane;other membranes;nucleus;other cell component	transporter activity;other molecular function	Pf00122, Pf00689, Pf00690, Pf00702, Pf12424, Pf13246	490	ENSG00000070961	ATP2B1	hsa:490; P20020; Q12992; Q12993; Q13819; Q13820; Q13821; Q16504; Q93082	Sensory processing of sound by inner hair cells of the cochlea; Ion homeostasis; Ion transport by P-type ATPases; Reduction of cytosolic Ca++ levels	Vitamin D receptor pathway; Splicing factor NOVA regulated synaptic proteins; Vitamin D-sensitive calcium signaling in depression; Calcium regulation in cardiac cells	8	9	0.943	0.953	1.129	0.881	1.03	1.022	0.982	0.786	0.816	0.856	0.788	0.815	0.903	0.879	0.838	1.011	1.198	0.934	1.093	1.084	1.042	0.834
High	Master Protein	E9PF32	DENN domain-containing protein 3 OS=Homo sapiens OX=9606 GN=DENND3 PE=1 SV=1	0.001	FALSE	4.133	2	2	2	2	1278	144.2	7.08	2.58	2	protein metabolism;other metabolic processes;transport		enzyme regulator activity	Pf02141, Pf19056		ENSG00000105339	DENND3	E9PF32			0	0	1.042	0.733	0.881	0.934	0.902	1.106	0.925	1.852	2.025	1.772	2.001	1.933	1.579	1.524	1.633	0.703	0.845	0.896	0.865	1.061	0.888	1.777
High	Master Protein	A0A087WZ97	Divergent protein kinase domain 1A OS=Homo sapiens OX=9606 GN=DIPK1A PE=1 SV=1	0.004	FALSE	2.61	4	1	1	1	403	46	6	2.85	1		other membranes;ER/Golgi		Pf12260, Pf14875	388650	ENSG00000154511	DIPK1A	A0A087WZ97			0	0
High	Master Protein	Q6ZWJ8	Kielin/chordin-like protein OS=Homo sapiens OX=9606 GN=KCP PE=2 SV=3	0.009	FALSE	2.216	1	1	1	1	1568	166.8	5.81	2.19	1		non-structural extracellular		Pf00093, Pf00094	375616	ENSG00000135253	KCP	A0A087WT73; hsa:375616; Q6ZWJ8; Q8NBE0			0	0
High	Master Protein	Q5F2F8	Serine/threonine-protein phosphatase OS=Homo sapiens OX=9606 GN=PPP3CB PE=1 SV=1	0	FALSE	21.709	13	6	8	3	496	56	5.71	18.85	6	protein metabolism;other metabolic processes;signal transduction		other molecular function	Pf00149		ENSG00000107758	PPP3CB	Q5F2F8		Alzheimer's disease and miRNA effects; Initiation of transcription and translation elongation at the HIV-1 LTR; Wnt signaling; Alzheimer's disease	4	0	1.133	0.957	0.816	0.69	0.913	0.876	0.742	1.231	1.138	1.064	1.216	0.59	0.822	0.996	0.662	0.845	0.721	0.609	0.806	0.774	0.655	1.087
High	Master Protein	Q92567	Protein FAM168A OS=Homo sapiens OX=9606 GN=FAM168A PE=1 SV=2	0.009	FALSE	2.161	3	1	2	1	244	26.2	8.98	4.2	1	other biological processes			Pf14944	23201	ENSG00000054965	FAM168A	A2ICY2; A2ID81; hsa:23201; Q86UG2; Q92567			0	0
High	Master Protein	Q96QD8	Sodium-coupled neutral amino acid transporter 2 OS=Homo sapiens OX=9606 GN=SLC38A2 PE=1 SV=2	0	FALSE	29.415	12	3	30	3	506	56	8	121.06	3	stress response;transport;developmental processes;other biological processes	plasma membrane;other membranes;other cell component	transporter activity	Pf01490	54407	ENSG00000134294	SLC38A2	hsa:54407; Q6IA88; Q6ZMG2; Q96QD8; Q9HAV3; Q9NVA8; Q9P2G5	Glutamate Neurotransmitter Release Cycle; Amino acid transport across the plasma membrane	Endochondral ossification; Endochondral ossification with skeletal dysplasias; Neuroinflammation and glutamatergic signaling	5	0	0.922	1.008	1.165	0.913	0.746	0.739	0.804	0.723	0.734	0.723	0.738	0.979	1.083	1.153	1.03	1.093	1.263	0.989	0.809	0.801	0.872	0.784
High	Master Protein	A0A0J9YXX3	Zinc transporter ZIP11 (Fragment) OS=Homo sapiens OX=9606 GN=SLC39A11 PE=1 SV=1	0.004	FALSE	2.645	20	1	1	1	84	9	10.51	3.31	1						ENSG00000282291	SLC39A11	A0A0J9YXX3			0	0	0.782	0.705	1.025	0.767	1.01	0.755	0.981	0.414	0.447	0.348	0.374	0.481	0.554	0.485	0.69	0.902	1.311	0.981	1.292	0.966	1.254	0.53
High	Master Protein	Q06481	Amyloid-like protein 2 OS=Homo sapiens OX=9606 GN=APLP2 PE=1 SV=2	0	FALSE	112.575	44	23	43	22	763	86.9	4.79	126.73	23	protein metabolism;other metabolic processes;transport;signal transduction;other biological processes	plasma membrane;other membranes;ER/Golgi;nucleus	enzyme regulator activity;nucleic acid binding activity;other molecular function	Pf00014, Pf02177, Pf10515, Pf12924, Pf12925	334	ENSG00000084234	APLP2	B3KXX9; H7BXI4; hsa:334; Q06481; Q13861; Q14594; Q14662; Q71U10; Q7M4L3; Q9BT36	Platelet degranulation ; Regulation of Insulin-like Growth Factor (IGF) transport and uptake by Insulin-like Growth Factor Binding Proteins (IGFBPs); Post-translational protein phosphorylation	Splicing factor NOVA regulated synaptic proteins	4	0	0.926	0.926	0.989	1.036	1.356	1.336	1.337	0.475	0.504	0.452	0.451	0.877	0.944	0.935	1.062	1	1.068	1.118	1.464	1.443	1.444	0.513
High	Master Protein	O00267	Transcription elongation factor SPT5 OS=Homo sapiens OX=9606 GN=SUPT5H PE=1 SV=1	0	FALSE	30.76	9	6	6	6	1087	120.9	5.06	22.72	6	RNA metabolism OR transcription;other metabolic processes;other biological processes	nucleus	nucleic acid binding activity;other molecular function	Pf00467, Pf03439, Pf11942	6829	ENSG00000196235	SUPT5H	hsa:6829; O00267; O43279; Q59G52; Q99639	Formation of RNA Pol II elongation complex ; Formation of HIV elongation complex in the absence of HIV Tat; Formation of HIV-1 elongation complex containing HIV-1 Tat; Pausing and recovery of Tat-mediated HIV elongation; Tat-mediated HIV elongation arrest and recovery; HIV elongation arrest and recovery; Pausing and recovery of HIV elongation; RNA Polymerase II Pre-transcription Events; TP53 Regu…	Initiation of transcription and translation elongation at the HIV-1 LTR; mRNA processing	20	0	1	0.998	0.904	0.932	0.709	0.713	0.747	1.912	1.618	1.806	2.009	1.697	1.523	1.371	1.448	0.998	0.904	0.932	0.709	0.713	0.747	1.912
High	Master Protein	O75425	Motile sperm domain-containing protein 3 OS=Homo sapiens OX=9606 GN=MOSPD3 PE=2 SV=1	0.002	FALSE	3.263	5	1	1	1	235	25.5	9.2	3.33	1	cell organization and biogenesis;developmental processes	plasma membrane;other membranes;ER/Golgi	other molecular function	Pf00635	64598	ENSG00000106330	MOSPD3	A4D2D1; A6NG17; C9JE89; D6W5W1; hsa:64598; O75423; O75424; O75425			0	0
High	Master Protein	E9PCW1	Golgi SNAP receptor complex member 1 OS=Homo sapiens OX=9606 GN=GOSR1 PE=1 SV=1	0	FALSE	19.93	27	5	8	5	248	28.3	9.32	25.05	5	transport	other membranes;ER/Golgi		Pf12352	9527	ENSG00000108587	GOSR1	E9PCW1			0	0	0.986	0.989	0.924	0.931	1.024	1.025	1.027	0.611	0.62	0.574	0.659	0.752	0.751	0.903	0.867	1.003	0.937	0.944	1.039	1.039	1.041	0.62
High	Master Protein	E7ET14	Lysine-specific demethylase PHF2 OS=Homo sapiens OX=9606 GN=PHF2 PE=1 SV=3	0.002	FALSE	3.271	6	1	1	1	309	33.1	8.92	3.55	1			other molecular function	Pf00628		ENSG00000197724	PHF2	E7ET14			0	0
High	Master Protein	A0A1P0AYU5	Sidoreflexin OS=Homo sapiens OX=9606 GN=SFXN3 PE=1 SV=1	0	FALSE	63.549	50	14	30	13	325	36	9.09	81.96	14	transport	other membranes;mitochondrion	transporter activity	Pf03820	81855	ENSG00000107819	SFXN3	A0A1P0AYU5; hsa:81855			0	1	1.052	1.165	1.159	1.604	1.794	1.846	1.782	1.366	1.52	1.476	1.491	1.089	1.046	1.089	1.186	1.107	1.101	1.524	1.705	1.754	1.693	1.298
High	Master Protein	P53701	Cytochrome c-type heme lyase OS=Homo sapiens OX=9606 GN=HCCS PE=1 SV=1	0	FALSE	61.783	62	13	29	13	268	30.6	6.68	90.6	13	cell organization and biogenesis;protein metabolism;other metabolic processes;developmental processes	other membranes;mitochondrion	other molecular function	Pf01265	3052	ENSG00000004961	HCCS	B3KUS1; hsa:3052; P53701; Q502X8			0	0	1.058	1.161	0.933	1.09	1.017	1.104	1.102	0.965	1.036	0.881	1.009	1.08	1.052	1.121	1.237	1.097	0.882	1.03	0.961	1.043	1.041	0.911
High	Master Protein	Q92620	Pre-mRNA-splicing factor ATP-dependent RNA helicase PRP16 OS=Homo sapiens OX=9606 GN=DHX38 PE=1 SV=2	0	FALSE	28.84	8	7	10	7	1227	140.4	6.54	24.12	7	RNA metabolism OR transcription;other metabolic processes;transport	nucleus	other molecular function	Pf00270, Pf00271, Pf04408, Pf07717	9785	ENSG00000140829	DHX38	B4DVG8; D3DWS7; hsa:9785; O75212; Q92620; Q96HN7	mRNA Splicing - Major Pathway; Transport of Mature mRNA derived from an Intron-Containing Transcript; mRNA 3'-end processing; RNA Polymerase II Transcription Termination	mRNA processing	5	0	1.009	0.968	0.966	0.75	0.947	0.97	1.01	1.563	1.45	1.465	1.235	1.402	1.381	0.854	1.158	0.96	0.958	0.743	0.939	0.962	1.001	1.549
High	Master Protein	P46926	Glucosamine-6-phosphate isomerase 1 OS=Homo sapiens OX=9606 GN=GNPDA1 PE=1 SV=1	0	FALSE	33.899	36	7	12	7	289	32.6	6.92	35.46	7	other metabolic processes;other biological processes	cytosol;other cell component	other molecular function	Pf01182	10007	ENSG00000113552	GNPDA1	B7Z3X4; D3DQE7; hsa:10007; P46926	Glycolysis		1	0	1.104	0.924	0.902	0.704	1.115	1.165	1.238	1.886	2.167	1.77	1.954	1.822	2.095	2.064	1.895	0.837	0.817	0.638	1.01	1.056	1.122	1.708
High	Master Protein	Q8TEH3	DENN domain-containing protein 1A OS=Homo sapiens OX=9606 GN=DENND1A PE=1 SV=2	0.002	FALSE	3.434	3	1	1	1	1009	110.5	6.96	4.57	1	transport;other biological processes	plasma membrane;other membranes;cytosol;nucleus;other cell component	enzyme regulator activity;other molecular function	Pf02141, Pf03455, Pf03456	57706	ENSG00000119522	DENND1A	A8MZA3; B1AM80; B7Z3C8; B7Z669; D3PFD3; hsa:57706; Q05C88; Q5VWF0; Q6PJZ5; Q8IVD6; Q8TEH3; Q9H796	RAB GEFs exchange GTP for GDP on RABs		1	0
High	Master Protein	A0A1B0GVH5	Alpha-ketoglutarate-dependent dioxygenase FTO OS=Homo sapiens OX=9606 GN=FTO PE=1 SV=1	0	FALSE	9.994	7	2	3	2	559	64.1	5.38	8.26	2	DNA metabolism;RNA metabolism OR transcription;other metabolic processes;stress response;developmental processes;other biological processes	plasma membrane;other membranes;cytosol;nucleus;other cell component	other molecular function	Pf12933, Pf12934		ENSG00000140718	FTO	A0A1B0GVH5			0	0
Medium	Master Protein	F5H630	Zinc finger protein 84 OS=Homo sapiens OX=9606 GN=ZNF84 PE=1 SV=1	0.025	FALSE	1.565	1	1	1	1	737	85.3	8.81	1.83	1	other biological processes		other molecular function	Pf00096, Pf01352, Pf13465		ENSG00000198040	ZNF84	F5H630			0	0
High	Master Protein	O95759	TBC1 domain family member 8 OS=Homo sapiens OX=9606 GN=TBC1D8 PE=1 SV=3	0	FALSE	13.922	6	4	6	4	1140	130.8	5.52	13.4	4	transport;other biological processes	other membranes	enzyme regulator activity	Pf00566, Pf02893	11138	ENSG00000204634	TBC1D8	A6NDL4; A8K9W1; B9A6K4; hsa:11138; O95759; Q53SQ4; Q9UQ32			0	0	1.31	0.93	0.769	0.95	1.1	1.202	0.788	1.213	0.893	1.439	1.161	1.1	1.137	1.168	0.941	0.71	0.587	0.725	0.84	0.918	0.602	0.926
High	Master Protein	Q9NWX5	Ankyrin repeat and SOCS box protein 6 OS=Homo sapiens OX=9606 GN=ASB6 PE=1 SV=1	0	FALSE	5.015	5	2	2	2	421	47.1	6.01	4.5	2	protein metabolism;other metabolic processes;signal transduction	cytosol		Pf07525, Pf12796	140459	ENSG00000148331	ASB6	hsa:140459; Q5SZB7; Q9BV15; Q9NWX5	Antigen processing: Ubiquitination & Proteasome degradation; Neddylation		2	0
High	Master Protein	Q8NHU6	Tudor domain-containing protein 7 OS=Homo sapiens OX=9606 GN=TDRD7 PE=1 SV=2	0	FALSE	11.521	4	4	4	4	1098	123.5	7.21	8.8	4	developmental processes;other biological processes	mitochondrion;other cell component	nucleic acid binding activity;other molecular function	Pf00567, Pf12872	23424	ENSG00000196116	TDRD7	A6NCI6; B2RBX3; B4DG99; B4DXF7; E7EQD4; hsa:23424; Q5VV27; Q8NHU6; Q96JT1; Q9UFF0; Q9Y2M3			0	0
High	Master Protein	O43688	Phospholipid phosphatase 2 OS=Homo sapiens OX=9606 GN=PLPP2 PE=1 SV=1	0	FALSE	19.06	18	4	9	4	288	32.6	8.35	25.07	4	other metabolic processes;signal transduction;other biological processes	plasma membrane;other membranes;ER/Golgi;other cytoplasmic organelle	other molecular function	Pf01569	8612	ENSG00000141934	PLPP2	A6NLV0; E9PAY8; hsa:8612; O43688	Sphingolipid de novo biosynthesis	Triacylglyceride synthesis	2	0	1.068	1.093	1.122	1.154	1.162	1.076	1.162	0.767	0.804	0.775	0.759	1.134	1.162	1.032	1.154	1.024	1.051	1.081	1.088	1.008	1.088	0.719
High	Master Protein	Q9Y6M7	Sodium bicarbonate cotransporter 3 OS=Homo sapiens OX=9606 GN=SLC4A7 PE=1 SV=2	0	FALSE	158.756	29	28	73	2	1214	136	6.71	190.49	28	transport;developmental processes;other biological processes	plasma membrane;other membranes;other cell component	transporter activity	Pf00955, Pf07565	9497	ENSG00000033867	SLC4A7	A6NIA8; B2CI53; B5M449; B5M451; B5M452; B5M453; B6DY52; B6DY53; C9JST9; D3K174; D3K175; hsa:9497; O60350; Q6AHZ9; Q9HC88; Q9UIB9; Q9Y6M7	RHOQ GTPase cycle; RHOJ GTPase cycle; RHOD GTPase cycle; RHOF GTPase cycle; RHOH GTPase cycle; Bicarbonate transporters	IL-18 signaling pathway	7	17	0.889	0.917	1.29	0.907	1.684	1.634	1.345	0.701	0.686	0.722	0.628	0.797	0.823	0.826	0.858	1.032	1.451	1.02	1.895	1.839	1.514	0.789
High	Master Protein	Q96EB6	NAD-dependent protein deacetylase sirtuin-1 OS=Homo sapiens OX=9606 GN=SIRT1 PE=1 SV=2	0	FALSE	8.807	7	2	3	2	747	81.6	4.67	11.13	2	cell organization and biogenesis;protein metabolism;DNA metabolism;other metabolic processes;stress response;developmental processes;signal transduction;other biological processes	other membranes;cytosol;mitochondrion;nucleus;other cell component	nucleic acid binding activity;other molecular function	Pf02146	23411	ENSG00000096717	SIRT1	hsa:23411; Q2XNF6; Q5JVQ0; Q96EB6; Q9GZR9; Q9Y6F0	Heme signaling; Circadian Clock; SIRT1 negatively regulates rRNA expression; Regulation of HSF1-mediated heat shock response; Regulation of FOXO transcriptional activity by acetylation	Androgen receptor signaling pathway; Energy metabolism; Sterol regulatory element-binding proteins (SREBP) signaling; SREBF and miR33 in cholesterol and lipid homeostasis; Melatonin metabolism and effects; NAD metabolism, sirtuins and aging; NAD+ metabolism; NAD+ biosynthetic pathways; Interactions between LOXL4 and oxidative stress pathway; Somatroph axis (GH) and its relationship to dietary res…	21	0
High	Master Protein	Q99569	Plakophilin-4 OS=Homo sapiens OX=9606 GN=PKP4 PE=1 SV=2	0	FALSE	86.747	23	19	33	19	1192	131.8	8.94	96.07	19	cell adhesion;cell-cell signaling;cell organization and biogenesis;developmental processes;other biological processes	plasma membrane;other membranes;cytoskeleton;nucleus;other cell component	other molecular function	Pf00514	8502	ENSG00000144283	PKP4	hsa:8502; Q86W91; Q99569	Formation of the cornified envelope; RND2 GTPase cycle; RND3 GTPase cycle; RND1 GTPase cycle		5	0	0.953	0.91	0.929	0.992	1.057	1.028	0.973	0.834	1	0.932	0.865	0.925	0.997	0.994	0.934	0.955	0.975	1.041	1.109	1.079	1.021	0.876
High	Master Protein	Q9NP77	RNA polymerase II subunit A C-terminal domain phosphatase SSU72 OS=Homo sapiens OX=9606 GN=SSU72 PE=1 SV=1	0.001	FALSE	4.121	6	1	1	1	194	22.6	5.33	2.67	1	protein metabolism;RNA metabolism OR transcription;other metabolic processes	cytosol;nucleus	other molecular function	Pf04722	29101	ENSG00000160075	SSU72	hsa:29101; Q9BZS6; Q9H933; Q9NP77	RNA polymerase II transcribes snRNA genes		1	0
High	Master Protein	O14976	Cyclin-G-associated kinase OS=Homo sapiens OX=9606 GN=GAK PE=1 SV=2	0	FALSE	53.371	14	11	16	11	1311	143.1	5.73	50.78	11	cell cycle OR cell proliferation;cell organization and biogenesis;protein metabolism;other metabolic processes;transport;other biological processes	cytosol;ER/Golgi;other cell component	kinase activity;other molecular function	Pf00069, Pf10409	2580	ENSG00000178950	GAK	hsa:2580; O14976; Q5U4P5; Q9BVY6	Clathrin-mediated endocytosis; Golgi Associated Vesicle Biogenesis		2	0	1.044	1.1	1.065	1.252	1.03	0.888	1.032	1.45	1.516	1.572	1.56	1.419	1.154	1.359	1.277	1.053	1.02	1.199	0.987	0.85	0.988	1.388
High	Master Protein	E9PFT6	Hemoglobin subunit delta OS=Homo sapiens OX=9606 GN=HBD PE=1 SV=1	0.009	TRUE	2.213	6	1	2	1	141	15.4	7.91	2.34	1	transport	cytosol	other molecular function	Pf00042		ENSG00000223609	HBD	E9PFT6			0	0	0.872	0.754	0.609	0.765	0.698	0.612	0.923	1.288	0.927	0.813	1.018	2.026	1.46	1.408	1.667	0.865	0.698	0.877	0.8	0.702	1.059	1.478
High	Master Protein	S4R410	Zinc finger SWIM domain-containing protein 8 OS=Homo sapiens OX=9606 GN=ZSWIM8 PE=1 SV=1	0	FALSE	14.782	3	3	3	3	1834	196.8	6.83	10.3	3			other molecular function			ENSG00000214655	ZSWIM8	S4R410			0	0
High	Master Protein	J3KQN4	60S ribosomal protein L36a OS=Homo sapiens OX=9606 GN=RPL36A PE=1 SV=1	0	FALSE	19.263	27	5	16	1	142	16.4	10.43	42.44	5	protein metabolism;other metabolic processes	plasma membrane;other membranes;cytosol;ER/Golgi;translational apparatus	other molecular function	Pf00935	6173	ENSG00000241343	RPL36A	hsa:6173; J3KQN4		Cytoplasmic ribosomal proteins	1	4	1.043	1.03	0.772	1.209	0.906	0.849	0.961	0.629	0.62	0.617	0.604	0.833	0.763	0.851	0.781	0.987	0.74	1.159	0.868	0.814	0.921	0.603
High	Master Protein	Q9UKV8	Protein argonaute-2 OS=Homo sapiens OX=9606 GN=AGO2 PE=1 SV=3	0	FALSE	24.636	7	5	9	4	859	97.1	9.19	18.91	5	cell-cell signaling;cell organization and biogenesis;protein metabolism;RNA metabolism OR transcription;other metabolic processes;developmental processes;signal transduction;other biological processes	non-structural extracellular;cytosol;nucleus;other cell component	nucleic acid binding activity;other molecular function	Pf02170, Pf02171, Pf08699, Pf16486, Pf16487, Pf16488	27161	ENSG00000123908	AGO2	hsa:27161; Q8TCZ5; Q8WV58; Q96ID1; Q9UKV8	MAPK6/MAPK4 signaling; Estrogen-dependent gene expression; Pre-NOTCH Transcription and Translation; Transcriptional regulation by small RNAs; MicroRNA (miRNA) biogenesis; TP53 Regulates Metabolic Genes; Ca2+ pathway; Regulation of MECP2 expression and activity; NR1H3 & NR1H2 regulate gene expression linked to cholesterol transport and efflux; Small interfering RNA (siRNA) biogenesis; Regulation o…	exRNA mechanism of action and biogenesis; Fragile X syndrome; Male infertility; Influence of laminopathies on Wnt signaling; Overlap between signal transduction pathways contributing to LMNA laminopathies	20	1	1.073	1.064	1.002	0.986	1.083	0.928	1.071	1.151	1.146	1.141	1.116	1.395	1.263	1.34	1.23	0.992	0.935	0.92	1.01	0.865	0.998	1.073
High	Master Protein	Q969Y2	tRNA modification GTPase GTPBP3, mitochondrial OS=Homo sapiens OX=9606 GN=GTPBP3 PE=1 SV=2	0	FALSE	46.252	20	7	17	7	492	52	6.48	55.84	7	RNA metabolism OR transcription;other metabolic processes	mitochondrion;nucleus;other cell component	other molecular function	Pf01926, Pf10396, Pf12631	84705	ENSG00000130299	GTPBP3	A6NFH1; A6NIG5; A6NKR4; A8K7B4; B7Z4V8; hsa:84705; Q8TCY6; Q8WUW9; Q969G4; Q969Y2; Q9BX61	tRNA modification in the mitochondrion		1	0	0.841	0.923	0.756	1.45	1.056	0.996	1.173	0.648	0.839	0.589	0.788	0.772	1.075	0.999	1.249	1.097	0.899	1.724	1.255	1.184	1.394	0.771
High	Master Protein	K7EPR5	cAMP-dependent protein kinase type I-alpha regulatory subunit (Fragment) OS=Homo sapiens OX=9606 GN=PRKAR1A PE=1 SV=8	0.002	FALSE	3.048	29	1	1	1	45	5.1	5.91	2.24	1				Pf02197		ENSG00000108946	PRKAR1A	K7EPR5		Mesodermal commitment pathway; Mesodermal commitment pathway; Cannabinoid receptor signaling; Lipid metabolism pathway; Fragile X syndrome	5	0
High	Master Protein	O95251	Histone acetyltransferase KAT7 OS=Homo sapiens OX=9606 GN=KAT7 PE=1 SV=1	0	FALSE	6.175	4	2	3	2	611	70.6	8.85	7.49	2	protein metabolism;DNA metabolism;other metabolic processes;stress response;developmental processes;signal transduction;other biological processes	cytosol;nucleus;other cell component	nucleic acid binding activity;other molecular function	Pf01530, Pf01853, Pf17772	11143	ENSG00000136504	KAT7	B3KN74; B4DF85; B4DFB4; B4DFE0; B4DGY4; E7ER15; G5E9K7; hsa:11143; O95251	HATs acetylate histones	Androgen receptor signaling pathway	2	0
High	Master Protein	Q5T5C7	Seryl-tRNA synthetase 1 OS=Homo sapiens OX=9606 GN=SARS1 PE=1 SV=1	0	FALSE	50.437	23	10	27	10	536	61.3	7.06	76.51	10	protein metabolism;RNA metabolism OR transcription;other metabolic processes	cytosol	other molecular function	Pf00587, Pf02403	6301	ENSG00000031698	SARS1	Q5T5C7		VEGFA-VEGFR2 signaling pathway	1	0	0.999	1.037	1.032	0.404	0.968	0.941	0.98	0.724	0.769	0.755	0.707	0.578	0.619	0.707	0.568	1.037	1.032	0.404	0.969	0.942	0.98	0.724
High	Master Protein	A0A2R8Y5Q8	Tubulin-specific chaperone E OS=Homo sapiens OX=9606 GN=TBCE PE=1 SV=1	0	FALSE	23.398	19	8	14	8	549	61.8	6.24	30.04	8		cytoskeleton;other cell component		Pf01302, Pf14560		ENSG00000284770	TBCE	A0A2R8Y5Q8			0	0	1.127	1.089	1.124	0.782	0.966	0.94	0.983	1.713	1.557	1.662	1.715	1.065	0.959	1.016	0.882	0.966	0.997	0.694	0.857	0.834	0.872	1.52
High	Master Protein	A0A087X2D5	39S ribosomal protein L45, mitochondrial OS=Homo sapiens OX=9606 GN=MRPL45 PE=1 SV=1	0	FALSE	27.801	31	8	17	8	306	35.3	9.03	29.33	8		mitochondrion		Pf04280	84311	ENSG00000278845	MRPL45	A0A087X2D5			0	0	0.831	1.016	0.738	1.35	1.296	1.343	1.39	0.726	0.937	0.818	0.874	0.716	0.926	0.756	0.962	1.223	0.888	1.624	1.559	1.615	1.672	0.873
High	Master Protein	Q86VP6	Cullin-associated NEDD8-dissociated protein 1 OS=Homo sapiens OX=9606 GN=CAND1 PE=1 SV=2	0	FALSE	121.829	27	29	53	27	1230	136.3	5.78	147.47	29	cell organization and biogenesis;protein metabolism;other metabolic processes;transport;other biological processes	non-structural extracellular;cytosol;ER/Golgi;nucleus;other cell component	other molecular function	Pf08623	55832	ENSG00000111530	CAND1	B2RAU3; hsa:55832; O94918; Q6PIY4; Q86VP6; Q8NDJ4; Q96JZ9; Q96T19; Q9BTC4; Q9H0G2; Q9P0H7; Q9UF85	Neutrophil degranulation; Neddylation; Iron uptake and transport	Endoderm differentiation	4	1	1.155	1.148	1.24	1.008	1.099	1.055	1.119	1.854	1.601	1.676	1.69	1.589	1.17	1.396	1.248	0.993	1.073	0.872	0.951	0.913	0.968	1.604
Medium	Master Protein	A0A1W2PQ00	STE20-related kinase adapter protein alpha (Fragment) OS=Homo sapiens OX=9606 GN=STRADA PE=1 SV=1	0.042	FALSE	1.315	4	1	1	1	265	29.5	6.52	2.36	1	protein metabolism;other metabolic processes		kinase activity;other molecular function	Pf00069		ENSG00000266173	STRADA	A0A1W2PQ00		AMP-activated protein kinase (AMPK) signaling; Focal adhesion: PI3K-Akt-mTOR-signaling pathway	2	0
High	Master Protein	Q9P003	Protein cornichon homolog 4 OS=Homo sapiens OX=9606 GN=CNIH4 PE=1 SV=1	0	FALSE	9.068	14	1	4	1	139	16.1	6.65	19	1	transport	other membranes;ER/Golgi;other cell component	signal transduction activity or receptor binding	Pf03311	29097	ENSG00000143771	CNIH4	A8K1Q8; B2R553; hsa:29097; Q9H0X8; Q9P003			0	0	0.921	1.063	1.227	1.101	1.029	1.073	0.825	1.032	0.73	1.052	0.821	0.663	0.878	0.68	0.838	1.154	1.332	1.195	1.117	1.165	0.895	1.12
High	Master Protein	H0YLF3	Beta-2-microglobulin (Fragment) OS=Homo sapiens OX=9606 GN=B2M PE=1 SV=1	0.001	TRUE	4.076	14	1	2	1	71	8.5	5.15	6.44	1	other biological processes	non-structural extracellular;plasma membrane;other membranes		Pf07654		ENSG00000166710; ENSG00000273686	B2M	H0YLF3			0	0	0.59	0.697	0.833	0.617	0.618	0.665	0.558	0.289	0.381	0.322	0.328	0.381	0.509	0.475	0.486	1.181	1.412	1.046	1.047	1.126	0.945	0.489
High	Master Protein	Q8NA72	Centrosomal protein POC5 OS=Homo sapiens OX=9606 GN=POC5 PE=1 SV=2	0	FALSE	9.419	5	3	3	3	575	63.3	7.42	7.51	3	cell cycle OR cell proliferation	cytosol;cytoskeleton;nucleus			134359	ENSG00000152359	POC5	B4DJG7; hsa:134359; Q494X7; Q494X9; Q6P085; Q8NA72			0	0
High	Master Protein	Q13561	Dynactin subunit 2 OS=Homo sapiens OX=9606 GN=DCTN2 PE=1 SV=4	0	FALSE	74.782	52	15	36	15	401	44.2	5.21	115.03	15	cell cycle OR cell proliferation;cell organization and biogenesis;transport;other biological processes	other membranes;cytosol;cytoskeleton;other cell component	cytoskeletal activity;other molecular function	Pf04912	10540	ENSG00000175203	DCTN2	B2RBK5; hsa:10540; Q13561; Q86YN2; Q9BW17	MHC class II antigen presentation; HSP90 chaperone cycle for steroid hormone receptors (SHR) in the presence of ligand; Recruitment of NuMA to mitotic centrosomes; COPI-mediated anterograde transport; COPI-independent Golgi-to-ER retrograde traffic; Regulation of PLK1 Activity at G2/M Transition; Loss of Nlp from mitotic centrosomes; Recruitment of mitotic centrosome proteins and complexes; Ancho…		11	0	0.983	1.067	1.064	1.197	1.133	1.091	1.036	1.515	1.427	1.598	1.538	1.156	1.142	1.252	1.155	1.085	1.082	1.217	1.152	1.109	1.054	1.54
High	Master Protein	M0QXD0	Mucolipin-1 (Fragment) OS=Homo sapiens OX=9606 GN=MCOLN1 PE=1 SV=1	0.002	FALSE	3.474	14	1	1	1	200	22.2	7.4	4.19	1	transport	ER/Golgi;nucleus;other cell component	transporter activity			ENSG00000090674	MCOLN1	M0QXD0		Iron metabolism in placenta	1	0
High	Master Protein	A0A590UJ53	KAT8 regulatory NSL complex subunit 3 OS=Homo sapiens OX=9606 GN=KANSL3 PE=1 SV=1	0	FALSE	5.737	3	2	2	2	903	95.8	9.31	6.03	2						ENSG00000114982	KANSL3	A0A590UJ53			0	0
High	Master Protein	A0A0G2JH37	Tapasin OS=Homo sapiens OX=9606 GN=TAPBP PE=1 SV=1	0	FALSE	17.202	17	5	8	5	466	49.5	6.92	12.25	5	other biological processes	other membranes		Pf07654		ENSG00000112493; ENSG00000206281; ENSG00000236490	TAPBP	A0A0G2JH37			0	0	0.933	0.913	1.645	1.192	1.253	1.187	1.135	0.742	0.873	0.655	0.721	0.852	0.902	0.763	0.958	0.978	1.762	1.277	1.343	1.272	1.216	0.795
High	Master Protein	F8VZH8	Protein unc-13 homolog A OS=Homo sapiens OX=9606 GN=UNC13A PE=1 SV=1	0.001	FALSE	4.64	1	2	2	1	1676	189.9	5.26	4.7	2	cell-cell signaling;cell organization and biogenesis;transport;signal transduction	other cell component	other molecular function	Pf00130, Pf00168, Pf06292		ENSG00000130477	UNC13A	F8VZH8		Synaptic vesicle pathway; 16p11.2 proximal deletion syndrome	2	0
High	Master Protein	E5RI98	Nucleophosmin (Fragment) OS=Homo sapiens OX=9606 GN=NPM1 PE=1 SV=1	0	FALSE	24.363	78	7	22	1	111	11.9	4.35	58.1	7		nucleus		Pf03066				A0A2J8LXV9			0	0
High	Master Protein	P32856	Syntaxin-2 OS=Homo sapiens OX=9606 GN=STX2 PE=1 SV=3	0	FALSE	25.123	21	5	10	5	288	33.3	6.28	25.65	5	cell-cell signaling;cell organization and biogenesis;stress response;transport;developmental processes;signal transduction;other biological processes	non-structural extracellular;plasma membrane;other membranes;ER/Golgi;other cell component	other molecular function	Pf00804, Pf05739	2054	ENSG00000111450	STX2	hsa:2054; P32856; Q86VW8		Synaptic vesicle pathway; Splicing factor NOVA regulated synaptic proteins	2	0	0.787	0.886	0.967	1.105	1.162	1.127	1.066	1.062	1.12	1.022	1.044	0.928	0.902	1.006	0.946	1.125	1.228	1.403	1.476	1.431	1.354	1.349
High	Master Protein	P48553	Trafficking protein particle complex subunit 10 OS=Homo sapiens OX=9606 GN=TRAPPC10 PE=1 SV=2	0	FALSE	11.158	3	4	5	4	1259	142.1	6.04	9.66	4	cell organization and biogenesis;transport	cytosol;ER/Golgi;other cytoplasmic organelle;other cell component		Pf12584	7109	ENSG00000160218	TRAPPC10	hsa:7109; P48553; Q3MIR2; Q86SI7; Q9UMD4; Q9Y4L3	RAB GEFs exchange GTP for GDP on RABs; COPII-mediated vesicle transport		2	0	1.118	1.211	1.022	1.025	1.457	1.349	1.286	0.991	0.969	1.16	0.867	0.928	0.971	1.051	0.97	1.084	0.915	0.917	1.304	1.207	1.15	0.887
High	Master Protein	C9J9P8	NEDD8-conjugating enzyme UBE2F (Fragment) OS=Homo sapiens OX=9606 GN=UBE2F PE=1 SV=1	0	FALSE	23.949	35	4	7	4	171	19.2	6.04	20.82	4			other molecular function	Pf00179		ENSG00000184182	UBE2F	C9J9P8			0	0	1.124	0.901	1.264	1.042	1.239	1	1.038	0.785	1.248	1.113	0.927	0.622	0.817	0.775	0.553	0.801	1.124	0.927	1.102	0.889	0.923	0.699
Medium	Master Protein	O60682	Musculin OS=Homo sapiens OX=9606 GN=MSC PE=1 SV=2	0.025	FALSE	1.56	7	1	1	1	206	22.1	9.09	0	1	developmental processes;other biological processes	nucleus;other cell component	nucleic acid binding activity;other molecular function	Pf00010	9242	ENSG00000178860	MSC	hsa:9242; O60682; O75946; Q53XZ2; Q9BRE7			0	0
High	Master Protein	Q9UHW5	GPN-loop GTPase 3 OS=Homo sapiens OX=9606 GN=GPN3 PE=1 SV=2	0	FALSE	12.014	18	3	5	3	284	32.7	4.5	16.44	3		other cell component	other molecular function	Pf03029	51184	ENSG00000111231	GPN3	B2RC54; D4YWV1; F5H759; hsa:51184; Q53FS3; Q6UVZ6; Q7Z3D3; Q8NEI2; Q96HK9; Q9UHW5			0	0	1.355	1.639	1.031	0.934	1.076	0.846	1.161	2.832	2.162	2.369	2.607	1.754	1.862	2.058	1.656	1.209	0.761	0.689	0.794	0.624	0.857	2.09
High	Master Protein	A0A590UJS9	Disks large homolog 1 OS=Homo sapiens OX=9606 GN=DLG1 PE=1 SV=1	0	FALSE	131.812	48	26	59	0	839	93.5	5.92	157.17	26		plasma membrane;other membranes		Pf00018, Pf00595, Pf00625, Pf09058, Pf10600, Pf10608		ENSG00000075711	DLG1	A0A590UJS9		T-cell antigen receptor (TCR) pathway during Staphylococcus aureus infection; Disruption of postsynaptic signaling by CNV; 3q29 copy number variation syndrome	3	0
High	Master Protein	P62820	Ras-related protein Rab-1A OS=Homo sapiens OX=9606 GN=RAB1A PE=1 SV=3	0	FALSE	90.448	78	14	99	5	205	22.7	6.21	270.89	14	cell adhesion;cell-cell signaling;cell organization and biogenesis;protein metabolism;other metabolic processes;stress response;transport;other biological processes	other membranes;cytosol;ER/Golgi;other cytoplasmic organelle;other cell component	other molecular function	Pf00071	5861	ENSG00000138069	RAB1A	hsa:5861; P11476; P62820; Q6FIE7; Q96N61; Q9Y3T2	RAB GEFs exchange GTP for GDP on RABs; COPI-dependent Golgi-to-ER retrograde traffic; COPI-mediated anterograde transport; COPII-mediated vesicle transport; RAB geranylgeranylation; Golgi Cisternae Pericentriolar Stack Reorganization		6	8	0.967	0.951	0.997	0.832	0.944	0.953	0.956	0.546	0.604	0.559	0.567	0.664	0.725	0.779	0.793	0.983	1.031	0.86	0.976	0.986	0.989	0.565
Medium	Master Protein	E9PK73	Succinate dehydrogenase [ubiquinone] cytochrome b small subunit OS=Homo sapiens OX=9606 GN=SDHD PE=1 SV=1	0.018	FALSE	1.81	8	1	1	1	131	14.4	9.55	2.86	1	other metabolic processes	other membranes;mitochondrion	other molecular function	Pf05328		ENSG00000204370	SDHD	E9PK73		Mitochondrial complex II assembly	1	0	1.079	1.073	0.837	0.367	0.427	0.363	0.296	0.11	0.088	0.041	0.092	0.157	0.118	0.117	0.149	0.994	0.776	0.34	0.396	0.336	0.274	0.102
High	Master Protein	Q9HAT8	E3 ubiquitin-protein ligase pellino homolog 2 OS=Homo sapiens OX=9606 GN=PELI2 PE=1 SV=1	0	FALSE	12.076	17	3	3	3	420	46.4	7.33	11.81	3	protein metabolism;other metabolic processes;signal transduction;other biological processes	cytosol	other molecular function	Pf04710	57161	ENSG00000139946	PELI2	B2RDY5; hsa:57161; Q9HAT8	Interleukin-1 signaling; IRAK1 recruits IKK complex; IRAK1 recruits IKK complex upon TLR7/8 or 9 stimulation	Regulation of toll-like receptor signaling pathway; IL-1 signaling pathway	5	0	1.076	0.947	1.018	0.788	0.792	0.768	0.728	0.745	0.734	0.901	0.864	0.919	0.906	0.952	0.77	0.88	0.946	0.732	0.736	0.714	0.677	0.692
High	Master Protein	Q8IZV5	Retinol dehydrogenase 10 OS=Homo sapiens OX=9606 GN=RDH10 PE=1 SV=1	0	FALSE	15.006	13	4	10	4	341	38.1	7.4	28.92	4	other metabolic processes;developmental processes;other biological processes	other membranes;ER/Golgi;other cell component	other molecular function	Pf00106	157506	ENSG00000121039	RDH10	hsa:157506; Q8IZV5	RA biosynthesis pathway; The canonical retinoid cycle in rods (twilight vision)	Vitamin A and carotenoid metabolism	3	0	1.161	0.903	0.971	0.182	0.378	0.376	0.447	0.333	0.275	0.316	0.329	0.265	0.28	0.31	0.3	0.778	0.836	0.157	0.326	0.324	0.385	0.287
High	Master Protein	H0YKL0	High mobility group protein 20A (Fragment) OS=Homo sapiens OX=9606 GN=HMG20A PE=1 SV=1	0.009	FALSE	2.141	10	1	1	1	118	13.6	5.87	2.55	1						ENSG00000140382	HMG20A	H0YKL0			0	0
High	Master Protein	O15327	Inositol polyphosphate 4-phosphatase type II OS=Homo sapiens OX=9606 GN=INPP4B PE=1 SV=4	0.004	FALSE	2.766	2	1	1	1	924	104.7	6.27	2.14	1	other metabolic processes;signal transduction	cytosol;other cell component	other molecular function		8821	ENSG00000109452	INPP4B	hsa:8821; O15327; Q2TAI2; Q5XLE7; Q6IN59; Q6PJB4	Synthesis of PIPs at the plasma membrane; Synthesis of PIPs at the early endosome membrane; Synthesis of IP2, IP, and Ins in the cytosol	VEGFA-VEGFR2 signaling pathway	4	0
High	Master Protein	P48059	LIM and senescent cell antigen-like-containing domain protein 1 OS=Homo sapiens OX=9606 GN=LIMS1 PE=1 SV=4	0	FALSE	17.323	16	5	7	4	325	37.2	8.05	12.71	5	cell adhesion;cell organization and biogenesis;signal transduction;other biological processes	plasma membrane;other membranes;cytosol;other cell component	other molecular function	Pf00412	3987	ENSG00000169756	LIMS1	B2RAJ4; B7Z483; B7Z7R3; B7Z907; hsa:3987; P48059; Q53TE0; Q9BS44	Regulation of cytoskeletal remodeling and cell spreading by IPP complex components	Primary focal segmental glomerulosclerosis (FSGS)	3	1	0.963	0.92	0.941	2.224	1.472	1.474	1.531	2.055	2.187	1.754	2.034	1.559	1.581	1.508	1.529	0.956	0.978	2.31	1.529	1.532	1.59	2.135
High	Master Protein	H7BXR3	Sorbin and SH3 domain-containing protein 2 (Fragment) OS=Homo sapiens OX=9606 GN=SORBS2 PE=1 SV=1	0.002	FALSE	3.392	2	1	1	1	636	70.1	9.6	1.96	1	cell organization and biogenesis	other membranes;other cell component		Pf00018, Pf02208		ENSG00000154556	SORBS2	H7BXR3		Extracellular vesicles in the crosstalk of cardiac cells	1	0
High	Master Protein	A0A5F9ZI51	Aprataxin OS=Homo sapiens OX=9606 GN=APTX PE=1 SV=1	0	FALSE	10.082	61	4	4	1	104	11.4	5.95	10.56	4						ENSG00000137074	APTX	A0A5F9ZI51			0	0
High	Master Protein	Q86SX6	Glutaredoxin-related protein 5, mitochondrial OS=Homo sapiens OX=9606 GN=GLRX5 PE=1 SV=2	0	FALSE	10.437	16	2	5	2	157	16.6	6.79	17.41	2	cell organization and biogenesis;protein metabolism;other metabolic processes;developmental processes	mitochondrion;nucleus;other cell component	other molecular function	Pf00462	51218	ENSG00000182512	GLRX5	hsa:51218; Q0X088; Q3YML0; Q86SX6; Q86WY3; Q8IZ54	Mitochondrial iron-sulfur cluster biogenesis		1	0	0.379	0.622	0.536	0.961	0.755	0.804	0.71	0.467	0.814	0.576	0.665	0.672	0.952	0.711	0.777	1.639	1.414	2.534	1.99	2.12	1.874	1.232
High	Master Protein	M0QXS3	DNA replication complex GINS protein PSF2 (Fragment) OS=Homo sapiens OX=9606 GN=GINS2 PE=1 SV=1	0.001	FALSE	4.108	33	1	1	1	51	6.1	5.35	4.06	1	other metabolic processes	other cell component				ENSG00000131153	GINS2	M0QXS3			0	0
High	Master Protein	Q86UX7	Fermitin family homolog 3 OS=Homo sapiens OX=9606 GN=FERMT3 PE=1 SV=1	0.008	FALSE	2.241	4	1	1	1	667	75.9	6.98	2.93	1	cell adhesion;cell organization and biogenesis;transport;signal transduction;other biological processes	non-structural extracellular;cytoskeleton;other cell component	signal transduction activity or receptor binding	Pf00169, Pf00373, Pf18124	83706	ENSG00000149781	FERMT3	hsa:83706; Q86UX7; Q8IUA1; Q8N207; Q9BT48	Platelet degranulation	Overview of leukocyte-intrinsic Hippo pathway functions	2	0
High	Master Protein	P11388	DNA topoisomerase 2-alpha OS=Homo sapiens OX=9606 GN=TOP2A PE=1 SV=3	0	FALSE	165.808	34	40	88	32	1531	174.3	8.72	237	40	cell cycle OR cell proliferation;cell organization and biogenesis;DNA metabolism;other metabolic processes;stress response;developmental processes;other biological processes	nucleus;other cell component	nucleic acid binding activity;other molecular function	Pf00204, Pf00521, Pf01751, Pf02518, Pf08070, Pf16898	7153	ENSG00000131747	TOP2A	B2RTS1; hsa:7153; P11388; Q71UN1; Q71UQ5; Q9HB24; Q9HB25; Q9HB26; Q9UP44; Q9UQP9	SUMOylation of DNA replication proteins; Transcription of E2F targets under negative control by DREAM complex	Gastric cancer network 1; Gastric cancer network 2; Retinoblastoma gene in cancer	5	7	1.252	0.951	0.724	0.944	0.696	0.827	0.907	3.027	3.184	3.023	2.393	1.629	1.142	1.372	1.266	0.759	0.578	0.754	0.556	0.661	0.725	2.418
High	Master Protein	Q99717	Mothers against decapentaplegic homolog 5 OS=Homo sapiens OX=9606 GN=SMAD5 PE=1 SV=1	0	FALSE	7.667	6	3	3	2	465	52.2	7.71	6.71	3	protein metabolism;other metabolic processes;developmental processes;signal transduction;other biological processes	cytosol;nucleus;other cell component	nucleic acid binding activity;other molecular function	Pf03165, Pf03166	4090	ENSG00000113658	SMAD5	hsa:4090; O14688; Q15798; Q99717; Q9UQA1	Signaling by BMP	Differentiation of white and brown adipocyte; BMP2-WNT4-FOXO1 pathway in primary endometrial stromal cell differentiation; BMP signaling in eyelid development; Embryonic stem cell pluripotency pathways; Genotoxicity pathway; Neovascularisation processes; Osteoblast differentiation and related diseases; TGF-beta receptor signaling in skeletal dysplasias; Network map of SARS-CoV-2 signaling pathway…	11	0	1.345	1.507	1.838	1.379	1.488	1.21	1.019	1.46	1.391	1.281	1.611	1.253	1.47	1.397	1.407	1.12	1.366	1.025	1.107	0.899	0.758	1.085
High	Master Protein	Q96ES7	SAGA-associated factor 29 OS=Homo sapiens OX=9606 GN=SGF29 PE=1 SV=1	0	FALSE	5.489	17	2	2	2	293	33.2	8.1	3.57	2	protein metabolism;other metabolic processes;other biological processes	nucleus	other molecular function	Pf07039	112869	ENSG00000176476	SGF29	hsa:112869; Q96ES7; Q96MF5	HATs acetylate histones		1	0
High	Master Protein	F8WE88	Unconventional myosin-Va OS=Homo sapiens OX=9606 GN=MYO5A PE=1 SV=2	0	FALSE	53.049	10	17	19	15	1855	215.2	8.51	40.44	17		cytoskeleton	cytoskeletal activity;other molecular function	Pf00063, Pf00612, Pf01843		ENSG00000197535	MYO5A	F8WE88		Joubert syndrome	1	1	1.015	1.056	1.183	0.793	0.915	0.923	0.979	0.972	1.135	1.006	1.226	1.264	1.42	1.248	1.429	1.041	1.166	0.782	0.902	0.909	0.965	0.958
High	Master Protein	A0A087X0W9	Deubiquitinase OTUD6B OS=Homo sapiens OX=9606 GN=OTUD6B PE=1 SV=1	0	FALSE	20.137	22	5	9	5	323	37.3	6.74	20.23	5	protein metabolism		other molecular function	Pf02338	51633	ENSG00000155100	OTUD6B	A0A087X0W9; hsa:51633			0	0	0.91	1.127	0.856	0.667	0.919	0.864	0.888	1.781	1.791	1.767	1.878	1.519	1.275	1.301	1.262	1.238	0.94	0.733	1.01	0.949	0.975	1.957
High	Master Protein	P13010	X-ray repair cross-complementing protein 5 OS=Homo sapiens OX=9606 GN=XRCC5 PE=1 SV=3	0	FALSE	207.882	65	35	135	35	732	82.7	5.81	362.33	35	cell cycle OR cell proliferation;cell organization and biogenesis;DNA metabolism;other metabolic processes;stress response;transport;developmental processes;other biological processes	non-structural extracellular;plasma membrane;other membranes;cytosol;nucleus;other cell component	enzyme regulator activity;nucleic acid binding activity;other molecular function	Pf02735, Pf03730, Pf03731, Pf08785	7520	ENSG00000079246	XRCC5	A8K3X5; hsa:7520; P13010; Q0Z7V0; Q4VBQ5; Q53HH7; Q7M4N0; Q9UCQ0; Q9UCQ1	Neutrophil degranulation; Cytosolic sensors of pathogen-associated DNA ; Nonhomologous End-Joining (NHEJ); 2-LTR circle formation; IRF3-mediated induction of type I IFN	Non-homologous end joining; Male infertility; DNA repair pathways, full network; p53 transcriptional gene network	9	0	1.086	1.052	0.781	0.989	1.056	1.023	1.114	1.538	1.467	1.514	1.572	1.189	1.137	1.397	1.203	0.969	0.719	0.91	0.972	0.942	1.026	1.415
High	Master Protein	P21283	V-type proton ATPase subunit C 1 OS=Homo sapiens OX=9606 GN=ATP6V1C1 PE=1 SV=4	0	FALSE	66.585	53	18	35	18	382	43.9	7.46	90.49	18	cell organization and biogenesis;stress response;transport;signal transduction;other biological processes	plasma membrane;other membranes;cytosol;other cytoplasmic organelle;other cell component	transporter activity	Pf03223	528	ENSG00000155097	ATP6V1C1	hsa:528; P21283	Amino acids regulate mTORC1; ROS and RNS production in phagocytes; Insulin receptor recycling; Transferrin endocytosis and recycling; Ion channel transport	Proximal tubule transport	6	0	1.063	1.016	1.045	0.828	0.949	0.897	0.925	1.475	1.332	1.367	1.388	1.313	1.213	1.35	1.159	0.956	0.983	0.779	0.892	0.844	0.87	1.388
High	Master Protein	P05026	Sodium/potassium-transporting ATPase subunit beta-1 OS=Homo sapiens OX=9606 GN=ATP1B1 PE=1 SV=1	0	FALSE	49.483	44	10	21	10	303	35	8.53	68.55	10	cell adhesion;cell organization and biogenesis;other metabolic processes;stress response;transport;signal transduction;other biological processes	plasma membrane;other membranes;cytoskeleton;other cell component	transporter activity;other molecular function	Pf00287	481	ENSG00000143153	ATP1B1	hsa:481; P05026; Q5TGZ3	Ion homeostasis; Ion transport by P-type ATPases; Potential therapeutics for SARS; Basigin interactions	Proximal tubule transport; Calcium regulation in cardiac cells	6	0	0.961	0.977	1.016	0.919	0.834	0.852	0.839	0.961	1.042	0.983	0.959	0.602	0.665	0.683	0.596	1.016	1.057	0.956	0.867	0.887	0.873	1
High	Master Protein	Q96KG9	N-terminal kinase-like protein OS=Homo sapiens OX=9606 GN=SCYL1 PE=1 SV=1	0	FALSE	36.033	23	11	14	11	808	89.6	6.3	47.05	11	protein metabolism;other metabolic processes;stress response;transport;developmental processes;other biological processes	other membranes;cytosol;cytoskeleton;ER/Golgi;nucleus;other cell component	nucleic acid binding activity;kinase activity;other molecular function	Pf00069	57410	ENSG00000142186	SCYL1	A6NJF1; hsa:57410; Q96G50; Q96KG8; Q96KG9; Q96KH1; Q9HAW5; Q9HBL3; Q9NR53			0	0	1.326	1.261	1.302	1.068	0.967	1.054	1.122	1.586	1.495	1.45	1.437	1.628	1.449	1.473	1.62	0.951	0.982	0.805	0.729	0.795	0.846	1.196
High	Master Protein	Q8WYA6	Beta-catenin-like protein 1 OS=Homo sapiens OX=9606 GN=CTNNBL1 PE=1 SV=1	0	FALSE	38.209	20	10	20	10	563	65.1	5.05	58.58	10	RNA metabolism OR transcription;other metabolic processes;developmental processes;other biological processes	cytosol;cytoskeleton;nucleus;other cell component	other molecular function	Pf08216	56259	ENSG00000132792	CTNNBL1	B4DE16; hsa:56259; Q0VAL9; Q0VAM0; Q53HI8; Q5JWZ2; Q5JWZ3; Q5JWZ7; Q5JWZ8; Q8N454; Q8NCL2; Q8TBD6; Q8WYA6; Q96KD2; Q9H7A5; Q9NQF9; Q9NTX0; Q9Y3M7	mRNA Splicing - Major Pathway		1	0	1.313	1.167	1.136	0.88	0.922	0.841	0.958	1.992	1.741	1.974	2.147	1.782	1.569	1.487	1.588	0.889	0.865	0.67	0.702	0.64	0.729	1.517
High	Master Protein	Q9NZM1	Myoferlin OS=Homo sapiens OX=9606 GN=MYOF PE=1 SV=1	0	FALSE	523.968	63	103	316	99	2061	234.6	6.18	909.68	103	cell organization and biogenesis;stress response;other biological processes	plasma membrane;other membranes;nucleus;other cell component	other molecular function	Pf00168, Pf08150, Pf08151, Pf08165, Pf16165	26509	ENSG00000138119	MYOF	B3KQN5; hsa:26509; Q5VWW2; Q5VWW3; Q5VWW4; Q5VWW5; Q7Z642; Q8IWH0; Q9HBU3; Q9NZM0; Q9NZM1; Q9ULL3; Q9Y4U4		Aryl hydrocarbon receptor pathway; Nuclear receptors meta-pathway; Hepatitis C and hepatocellular carcinoma	3	4	0.962	0.962	1.26	0.768	0.9	0.919	0.935	0.819	0.863	0.849	0.827	0.494	0.522	0.554	0.498	1	1.31	0.798	0.936	0.955	0.972	0.851
High	Master Protein	O00506	Serine/threonine-protein kinase 25 OS=Homo sapiens OX=9606 GN=STK25 PE=1 SV=1	0	FALSE	22.529	20	6	14	5	426	48.1	6.74	36.09	6	cell organization and biogenesis;protein metabolism;other metabolic processes;stress response;developmental processes;signal transduction;other biological processes	other membranes;ER/Golgi;other cell component	kinase activity;other molecular function	Pf00069	10494	ENSG00000115694	STK25	A8K6Z3; A8K7D2; B7Z9K1; hsa:10494; O00506; Q15522; Q5BJF1			0	0	0.696	0.914	0.737	0.884	0.564	0.782	0.793	0.719	0.727	0.827	0.789	1.047	1.004	1.091	0.979	1.314	1.059	1.271	0.811	1.125	1.14	1.033
High	Master Protein	W5RWE6	PX domain-containing protein kinase-like protein OS=Homo sapiens OX=9606 GN=PXK PE=1 SV=1	0.001	FALSE	4.351	2	1	3	1	557	63.1	9.35	8.65	1	protein metabolism;other metabolic processes	plasma membrane;other membranes;cytosol;cytoskeleton	cytoskeletal activity;kinase activity;other molecular function	Pf00787, Pf02205		ENSG00000168297	PXK	W5RWE6			0	0
High	Master Protein	X6RM59	5'-nucleotidase OS=Homo sapiens OX=9606 GN=NT5C3A PE=1 SV=1	0	FALSE	79.775	60	17	34	17	331	37.4	6.87	93.31	17	other metabolic processes	other cell component	other molecular function	Pf05822		ENSG00000122643	NT5C3A	X6RM59			0	0	1.007	1.077	0.503	1.403	1.03	1.061	1.12	0.881	0.94	0.904	0.907	0.695	0.749	0.717	0.818	1.069	0.499	1.393	1.022	1.054	1.112	0.875
High	Master Protein	A6NF31	Oral-facial-digital syndrome 1 protein OS=Homo sapiens OX=9606 GN=OFD1 PE=1 SV=1	0	FALSE	12.938	5	4	4	4	872	100.9	5.96	9.32	4		cytoskeleton			8481	ENSG00000046651	OFD1	A6NF31		Genes related to primary cilium development (based on CRISPR); Joubert syndrome; Ciliopathies	3	0	1.122	1.218	1.083	0.881	0.965	0.81	0.869	0.992	0.943	1.001	1.002	1.137	0.78	0.919	0.973	1.086	0.965	0.785	0.86	0.722	0.775	0.884
High	Master Protein	Q8WVV9	Heterogeneous nuclear ribonucleoprotein L-like OS=Homo sapiens OX=9606 GN=HNRNPLL PE=1 SV=1	0	FALSE	76.249	32	13	24	13	542	60	7.72	74.96	13	RNA metabolism OR transcription;other metabolic processes;other biological processes	nucleus	nucleic acid binding activity	Pf00076, Pf11835, Pf13893	92906	ENSG00000143889	HNRNPLL	hsa:92906; Q53T80; Q5JB51; Q5JB52; Q659B9; Q8IVH5; Q8IVH6; Q8WVV9; Q96HR5			0	0	1.143	1.143	1.093	0.921	1.016	0.935	1.025	1.411	1.361	1.391	1.432	1.592	1.559	1.463	1.643	1	0.957	0.806	0.889	0.818	0.897	1.235
High	Master Protein	Q86W92	Liprin-beta-1 OS=Homo sapiens OX=9606 GN=PPFIBP1 PE=1 SV=2	0	FALSE	146.56	39	30	62	22	1011	114	5.55	190.54	30	cell adhesion;cell organization and biogenesis	plasma membrane;other membranes;cytosol;other cell component		Pf00536, Pf07647	8496	ENSG00000110841	PPFIBP1	hsa:8496; O75336; Q86W92; Q86X70; Q9NY03; Q9ULJ0	Signaling by ALK fusions and activated point mutants; Receptor-type tyrosine-protein phosphatases		2	6	1.059	1.036	1.099	2.303	1.277	1.288	1.383	2.303	2.389	2.379	2.211	1.676	1.575	1.669	1.491	0.978	1.038	2.174	1.205	1.216	1.306	2.174
High	Master Protein	Q9H444	Charged multivesicular body protein 4b OS=Homo sapiens OX=9606 GN=CHMP4B PE=1 SV=1	0	FALSE	32.265	50	10	19	9	224	24.9	4.82	50.93	10	cell cycle OR cell proliferation;cell organization and biogenesis;protein metabolism;other metabolic processes;transport;other biological processes	plasma membrane;other membranes;cytosol;nucleus;other cytoplasmic organelle;other cell component	other molecular function	Pf03357	128866	ENSG00000101421	CHMP4B	E1P5N4; hsa:128866; Q53ZD6; Q9H444	Sealing of the nuclear envelope (NE) by ESCRT-III; Macroautophagy; HCMV Late Events; Budding and maturation of HIV virion; Endosomal Sorting Complex Required For Transport (ESCRT); Late endosomal microautophagy; Pyroptosis; Translation of Replicase and Assembly of the Replication Transcription Complex; Translation of Replicase and Assembly of the Replication Transcription Complex		9	1	0.88	1.146	1.224	0.561	0.916	0.904	0.81	0.738	0.762	0.874	0.786	0.869	0.902	0.978	0.875	1.302	1.39	0.637	1.04	1.027	0.92	0.838
High	Master Protein	A0A087WY03	Splicing regulatory glutamine/lysine-rich protein 1 OS=Homo sapiens OX=9606 GN=SREK1 PE=1 SV=1	0	FALSE	5.838	13	1	3	1	100	10.7	4.78	10.59	1	RNA metabolism OR transcription;other metabolic processes		nucleic acid binding activity	Pf00076		ENSG00000153914	SREK1	A0A087WY03			0	0	1.143	1.192	1.142	0.638	0.815	0.687	0.975	1.196	0.873	0.888	1.047	0.999	0.918	0.768	1.047	1.042	0.999	0.558	0.713	0.601	0.853	1.046
High	Master Protein	P05121	Plasminogen activator inhibitor 1 OS=Homo sapiens OX=9606 GN=SERPINE1 PE=1 SV=1	0	FALSE	47.261	30	11	22	11	402	45	7.2	51.15	11	cell organization and biogenesis;stress response;transport;developmental processes;other biological processes	non-structural extracellular;extracellular matrix;plasma membrane;other membranes;other cell component	signal transduction activity or receptor binding;enzyme regulator activity;other molecular function	Pf00079	5054	ENSG00000106366	SERPINE1	B7Z4S0; F8WD53; hsa:5054; P05121	BMAL1:CLOCK,NPAS2 activates circadian gene expression; ECM proteoglycans; Platelet degranulation ; SMAD2/SMAD3:SMAD4 heterotrimer regulates transcription; Dissolution of Fibrin Clot	Selenium micronutrient network; Vitamin B12 metabolism; Folate metabolism; Adipogenesis; Oncostatin M signaling pathway; Blood clotting cascade; Photodynamic therapy-induced HIF-1 survival signaling; Hypothesized pathways in pathogenesis of cardiovascular disease; miRNA regulation of p53 pathway in prostate cancer; Gastrin signaling pathway; TGF-beta receptor signaling in skeletal dysplasias; p53…	21	0	1.079	1.066	0.596	1.28	0.974	1.063	1.489	0.645	0.78	0.699	0.704	0.426	0.486	0.473	0.559	0.988	0.552	1.186	0.903	0.985	1.38	0.598
High	Master Protein	P49796	Regulator of G-protein signaling 3 OS=Homo sapiens OX=9606 GN=RGS3 PE=1 SV=2	0.004	FALSE	2.664	2	1	1	1	1198	132.3	6.28	4	1	signal transduction;other biological processes	plasma membrane;other membranes;cytosol;nucleus	enzyme regulator activity	Pf00168, Pf00595, Pf00615	5998	ENSG00000138835	RGS3	A6NHA0; A8K0V1; B3KUB2; hsa:5998; P49796; Q5VXB8; Q5VXC1; Q5VZ05; Q5VZ06; Q6ZRM5; Q8IUQ1; Q8NC47; Q8NFN4; Q8NFN5; Q8NFN6; Q8TD59; Q8TD68; Q8WV02; Q8WXA0	G alpha (i) signalling events; G alpha (q) signalling events	Myometrial relaxation and contraction pathways; Calcium regulation in cardiac cells	4	0
High	Master Protein	H7BYT1	Casein kinase I isoform delta OS=Homo sapiens OX=9606 GN=CSNK1D PE=1 SV=2	0	FALSE	17.828	19	5	8	2	427	49	9.94	18.19	5	protein metabolism;other metabolic processes;other biological processes	plasma membrane;other membranes;cytoskeleton;ER/Golgi;other cell component	kinase activity;other molecular function	Pf00069		ENSG00000141551	CSNK1D	H7BYT1		Integrated breast cancer pathway; Melatonin metabolism and effects; Hedgehog signaling pathway	3	0
High	Master Protein	P08621	U1 small nuclear ribonucleoprotein 70 kDa OS=Homo sapiens OX=9606 GN=SNRNP70 PE=1 SV=2	0	FALSE	84.396	46	15	56	15	437	51.5	9.94	134.28	15	RNA metabolism OR transcription;other metabolic processes;other biological processes	nucleus	nucleic acid binding activity	Pf00076, Pf12220	6625	ENSG00000104852	SNRNP70	B3KUA3; hsa:6625; P08621; P78493; P78494; Q15364; Q15686; Q15687; Q15689; Q99377; Q9UE45; Q9UE46; Q9UE47; Q9UE48; Q9UFQ6	mRNA Splicing - Major Pathway	mRNA processing	2	0	1.32	1.338	1.443	0.957	0.969	0.892	0.888	1.291	1.009	1.611	1.628	1.123	1.059	1.148	1.439	1.013	1.093	0.725	0.734	0.675	0.673	0.978
High	Master Protein	Q658P3	Metalloreductase STEAP3 OS=Homo sapiens OX=9606 GN=STEAP3 PE=1 SV=2	0	FALSE	35.615	21	7	17	7	488	54.6	8.6	43.35	7	cell cycle OR cell proliferation;transport;other biological processes	plasma membrane;other membranes;other cytoplasmic organelle;other cell component	other molecular function	Pf01794, Pf03807	55240	ENSG00000115107	STEAP3	A8K6E3; hsa:55240; Q4VBR2; Q4ZG36; Q53SQ8; Q658P3; Q7Z389; Q86SF6; Q8NEW6; Q8TDP3; Q8TF03; Q9NVB5	RHOQ GTPase cycle; RHOJ GTPase cycle; Transferrin endocytosis and recycling; RHOD GTPase cycle; RHOF GTPase cycle; CDC42 GTPase cycle; TP53 Regulates Transcription of Genes Involved in Cytochrome C Release	Iron metabolism in placenta; Copper homeostasis; Ferroptosis	10	0	1.005	1.043	0.999	1.545	1.463	1.473	1.558	0.766	0.771	0.771	0.744	0.613	0.632	0.661	0.558	1.038	0.994	1.537	1.456	1.466	1.551	0.762
High	Master Protein	O00116	Alkyldihydroxyacetonephosphate synthase, peroxisomal OS=Homo sapiens OX=9606 GN=AGPS PE=1 SV=1	0	FALSE	163.295	54	26	175	26	658	72.9	7.34	563.52	26	other metabolic processes;other biological processes	cytosol;nucleus;other cytoplasmic organelle	other molecular function	Pf01565, Pf02913	8540	ENSG00000018510	AGPS	A5D8U9; hsa:8540; O00116; Q2TU35	Plasmalogen biosynthesis; TYSND1 cleaves peroxisomal proteins	Triacylglyceride synthesis	4	0	0.969	0.888	0.873	0.984	0.925	0.931	0.964	0.659	0.707	0.64	0.666	0.731	0.783	0.803	0.794	0.916	0.901	1.015	0.954	0.961	0.994	0.68
High	Master Protein	A0A1B0GUI1	Ral GTPase-activating protein subunit alpha-1 OS=Homo sapiens OX=9606 GN=RALGAPA1 PE=1 SV=1	0	FALSE	36.266	7	11	16	11	2495	280.2	6.44	38.43	11	other biological processes	nucleus	enzyme regulator activity	Pf02145	253959	ENSG00000174373	RALGAPA1	A0A1B0GUI1		Integrated breast cancer pathway	1	0	1.048	0.951	1.242	1.226	1.394	1.038	1.207	1.634	1.473	1.602	1.54	1.302	1.216	1.347	1.169	0.907	1.184	1.17	1.33	0.99	1.151	1.558
High	Master Protein	Q969P0	Immunoglobulin superfamily member 8 OS=Homo sapiens OX=9606 GN=IGSF8 PE=1 SV=1	0	FALSE	8.266	6	2	4	2	613	65	8	13.7	2	developmental processes;other biological processes	plasma membrane;other membranes;other cell component		Pf07686	93185	ENSG00000162729	IGSF8	hsa:93185; Q8NG09; Q969P0; Q96DP4; Q9BTG9			0	0
High	Master Protein	Q7Z2K8	G protein-regulated inducer of neurite outgrowth 1 OS=Homo sapiens OX=9606 GN=GPRIN1 PE=1 SV=2	0	FALSE	45.877	16	13	18	13	1008	102.3	8.06	39.22	13	cell organization and biogenesis;developmental processes	plasma membrane;other membranes;other cell component	other molecular function	Pf15235	114787	ENSG00000169258	GPRIN1	C9JM70; hsa:114787; Q7Z2K8; Q8ND74; Q96PZ4	MECP2 regulates neuronal receptors and channels	MECP2 and associated Rett syndrome	2	0	0.952	0.892	0.641	0.769	0.514	0.536	0.569	0.615	0.647	0.686	0.66	0.656	0.729	0.725	0.63	0.938	0.673	0.808	0.54	0.563	0.598	0.647
High	Master Protein	P15531	Nucleoside diphosphate kinase A OS=Homo sapiens OX=9606 GN=NME1 PE=1 SV=1	0	FALSE	45.714	70	10	28	1	152	17.1	6.19	70.98	10	DNA metabolism;other metabolic processes;transport;developmental processes;other biological processes	plasma membrane;other membranes;cytosol;cytoskeleton;mitochondrion;nucleus;other cell component	cytoskeletal activity;translation activity;nucleic acid binding activity;kinase activity;other molecular function	Pf00334	4830	ENSG00000239672	NME1	hsa:4830; P15531; Q6FGK3; Q86XQ2; Q9UDJ6	Interconversion of nucleotide di- and triphosphates	Pyrimidine metabolism	2	0	0.887	0.899	0.843	0.994	1.225	1.149	1.296	1.303	1.556	0.937	1.311	0.851	1.103	1.023	0.996	1.014	0.95	1.121	1.381	1.296	1.462	1.47
High	Master Protein	Q8TEA7	TBC domain-containing protein kinase-like protein OS=Homo sapiens OX=9606 GN=TBCK PE=1 SV=4	0	FALSE	7.012	2	2	3	2	893	100.6	6.58	7.66	2	cell cycle OR cell proliferation;cell organization and biogenesis;protein metabolism;other metabolic processes;transport;other biological processes	cytoskeleton;other cell component	enzyme regulator activity;kinase activity;other molecular function	Pf00069, Pf00566, Pf00581	93627	ENSG00000145348	TBCK	B9A6J1; hsa:93627; Q4W5B3; Q4W5E1; Q6NUP4; Q8N7M8; Q8TEA7; Q8WW57; Q96GV6; Q9P080			0	0	0.809	0.825	0.891	0.975	1.115	0.8	0.639	0.876	0.976	1.263	0.904	0.978	0.857	1.05	1.146	1.02	1.102	1.206	1.379	0.99	0.79	1.083
High	Master Protein	Q8N0Y7	Probable phosphoglycerate mutase 4 OS=Homo sapiens OX=9606 GN=PGAM4 PE=3 SV=1	0	FALSE	24.942	31	5	15	1	254	28.8	6.65	43.16	5	other metabolic processes;other biological processes	cytoskeleton	other molecular function	Pf00300	441531	ENSG00000226784	PGAM4	hsa:441531; Q5JPN2; Q8N0Y7; Q8NI24; Q8NI25; Q8NI26			0	0
High	Master Protein	Q8IVF7	Formin-like protein 3 OS=Homo sapiens OX=9606 GN=FMNL3 PE=1 SV=3	0	FALSE	72.494	21	20	32	14	1028	117.1	6.65	81.92	20	cell organization and biogenesis;developmental processes;other biological processes	plasma membrane;other membranes;cytosol;ER/Golgi;other cell component	cytoskeletal activity;other molecular function	Pf02181, Pf06367, Pf06371	91010	ENSG00000161791	FMNL3	B0JZA7; hsa:91010; Q6ZRJ1; Q8IVF7	RHO GTPases Activate Formins; RHOJ GTPase cycle; RHOC GTPase cycle; RHOA GTPase cycle; CDC42 GTPase cycle	VEGFA-VEGFR2 signaling pathway	6	0	0.962	0.952	0.96	1.604	1.444	1.419	1.439	0.898	0.908	0.916	0.862	1.179	1.316	1.349	1.125	0.99	0.998	1.668	1.501	1.476	1.497	0.934
High	Master Protein	E9PGM1	Eukaryotic translation initiation factor 4 gamma 1 OS=Homo sapiens OX=9606 GN=EIF4G1 PE=1 SV=1	0	FALSE	260.719	45	57	148	2	1513	166.6	5.21	407.47	57	protein metabolism;other metabolic processes	cytosol;other cell component	nucleic acid binding activity;other molecular function	Pf02020, Pf02847, Pf02854		ENSG00000114867	EIF4G1	E9PGM1		Acute viral myocarditis; Fragile X syndrome; Malignant pleural mesothelioma	3	0	1.148	1.382	0.644	1.308	1.191	1.15	1.12	1.755	1.375	1.994	1.767	2.01	1.512	1.997	1.553	1.204	0.56	1.139	1.037	1.001	0.975	1.528
High	Master Protein	O43854	EGF-like repeat and discoidin I-like domain-containing protein 3 OS=Homo sapiens OX=9606 GN=EDIL3 PE=1 SV=1	0	FALSE	4.935	3	1	1	1	480	53.7	7.28	3.72	1	cell adhesion;developmental processes;other biological processes		signal transduction activity or receptor binding;other molecular function	Pf00008, Pf00754, Pf12661	10085	ENSG00000164176	EDIL3	B2R763; hsa:10085; O43854; O43855; Q5D094; Q8N610			0	0
High	Master Protein	Q12899	Tripartite motif-containing protein 26 OS=Homo sapiens OX=9606 GN=TRIM26 PE=1 SV=1	0	FALSE	19.345	10	6	7	6	539	62.1	5.03	19.05	6	protein metabolism;other metabolic processes;stress response;signal transduction;other biological processes	cytosol;nucleus;other cell component	nucleic acid binding activity;other molecular function	Pf00622, Pf00643, Pf13765, Pf15227	7726	ENSG00000137313; ENSG00000226060; ENSG00000228881; ENSG00000230230; ENSG00000231002; ENSG00000231641; ENSG00000234046; ENSG00000234127	TRIM26	A6NG96; hsa:7726; Q12899; Q5SRL2	Interferon gamma signaling		1	0	1.327	1.033	1.011	1.647	1.076	0.739	0.739	1.066	1.385	1.063	1.033	2.267	2.109	1.874	1.967	0.778	0.762	1.241	0.811	0.557	0.556	0.803
Medium	Master Protein	H3BV57	Thymidine kinase 2, mitochondrial OS=Homo sapiens OX=9606 GN=TK2 PE=1 SV=1	0.022	FALSE	1.673	8	1	1	1	120	13.3	12.04	0	1											0	0
High	Master Protein	H0Y8P3	LIM and calponin homology domains-containing protein 1 (Fragment) OS=Homo sapiens OX=9606 GN=LIMCH1 PE=1 SV=1	0	FALSE	30.424	11	8	8	8	917	103.4	6.54	23.04	8			other molecular function	Pf00412, Pf15949		ENSG00000064042	LIMCH1	H0Y8P3			0	0
High	Master Protein	O75064	DENN domain-containing protein 4B OS=Homo sapiens OX=9606 GN=DENND4B PE=1 SV=4	0	FALSE	4.926	2	2	2	2	1496	163.7	7.21	5.28	2	other biological processes	cytosol;ER/Golgi;nucleus;other cell component	enzyme regulator activity	Pf02141, Pf03455, Pf03456	9909	ENSG00000198837	DENND4B	hsa:9909; O75064; Q5T4K0	RAB GEFs exchange GTP for GDP on RABs		1	0
High	Master Protein	P26196	Probable ATP-dependent RNA helicase DDX6 OS=Homo sapiens OX=9606 GN=DDX6 PE=1 SV=2	0	FALSE	101.366	56	18	42	17	483	54.4	8.66	124.36	18	cell organization and biogenesis;RNA metabolism OR transcription;other metabolic processes;other biological processes	cytosol;cytoskeleton;mitochondrion;nucleus;other cell component	nucleic acid binding activity;other molecular function	Pf00270, Pf00271	1656	ENSG00000110367	DDX6	hsa:1656; P26196; Q5D048	mRNA decay by 5' to 3' exoribonuclease		1	0	1.115	1.085	0.823	1.358	1.14	1.05	1.141	1.762	1.713	1.832	1.725	1.608	1.513	1.598	1.407	0.974	0.739	1.218	1.022	0.942	1.023	1.58
High	Master Protein	Q9NQT5	Exosome complex component RRP40 OS=Homo sapiens OX=9606 GN=EXOSC3 PE=1 SV=3	0	FALSE	19.468	20	3	5	3	275	29.6	8.1	18.96	3	DNA metabolism;RNA metabolism OR transcription;other metabolic processes;developmental processes;other biological processes	cytosol;nucleus;other cytoplasmic organelle;other cell component	nucleic acid binding activity;other molecular function	Pf15985	51010	ENSG00000107371	EXOSC3	A8K0K6; hsa:51010; Q5QP85; Q9NQT5; Q9Y3A8	Major pathway of rRNA processing in the nucleolus and cytosol; mRNA decay by 3' to 5' exoribonuclease; Tristetraprolin (TTP, ZFP36) binds and destabilizes mRNA; Butyrate Response Factor 1 (BRF1) binds and destabilizes mRNA; ATF4 activates genes in response to endoplasmic reticulum stress; KSRP (KHSRP) binds and destabilizes mRNA		6	0	1.156	1.092	1.429	0.809	0.81	0.737	0.764	1.959	1.711	1.92	1.864	1.664	1.608	1.409	1.257	0.944	1.236	0.699	0.701	0.638	0.661	1.695
Medium	Master Protein	Q7L8J4	SH3 domain-binding protein 5-like OS=Homo sapiens OX=9606 GN=SH3BP5L PE=1 SV=1	0.041	FALSE	1.324	7	1	1	1	393	43.5	5.77	2.24	1	signal transduction;other biological processes	other cell component	enzyme regulator activity	Pf05276	80851	ENSG00000175137	SH3BP5L	B4DQ94; hsa:80851; Q7L8J4; Q96FI5; Q9BQH8; Q9C0E3			0	0
High	Master Protein	Q9BRK0	Receptor expression-enhancing protein 2 OS=Homo sapiens OX=9606 GN=REEP2 PE=1 SV=2	0.001	FALSE	3.728	10	1	3	1	252	28.2	9.54	8.68	1	cell organization and biogenesis;transport;other biological processes	plasma membrane;other membranes;cytoskeleton;ER/Golgi	signal transduction activity or receptor binding;cytoskeletal activity	Pf03134	51308	ENSG00000132563	REEP2	hsa:51308; Q53EM8; Q9BRK0; Q9NYF2			0	0
High	Master Protein	D6RIZ4	Major facilitator superfamily domain-containing protein 10 OS=Homo sapiens OX=9606 GN=MFSD10 PE=1 SV=1	0	FALSE	11.709	10	3	5	3	356	38.2	9.73	15.28	3	transport	other membranes	transporter activity	Pf07690		ENSG00000109736	MFSD10	D6RIZ4			0	0	1.034	0.969	1.222	0.851	1.018	0.909	0.872	0.737	0.708	0.785	0.748	0.846	0.865	0.824	0.957	0.937	1.182	0.822	0.984	0.879	0.843	0.712
High	Master Protein	Q7L590	Protein MCM10 homolog OS=Homo sapiens OX=9606 GN=MCM10 PE=1 SV=2	0	FALSE	7.584	6	2	2	2	875	98.1	8.75	6.43	2	cell cycle OR cell proliferation;DNA metabolism;other metabolic processes;stress response	nucleus	nucleic acid binding activity;other molecular function	Pf09329, Pf09332	55388	ENSG00000065328	MCM10	A8K9I6; B7ZKZ8; hsa:55388; Q3MIR3; Q7L590; Q7LD55; Q96GX4; Q96NB6; Q9H0D7; Q9H3P9; Q9P177	Activation of ATR in response to replication stress; Activation of the pre-replicative complex	Ciliary landscape; DNA replication	4	0
High	Master Protein	B5MDG7	SWI/SNF-related matrix-associated actin-dependent regulator of chromatin subfamily E member 1-related (Fragment) OS=Homo sapiens OX=9606 GN=HMG20B PE=1 SV=2	0	FALSE	11.137	16	3	4	3	286	31.2	6.55	12.12	3		nucleus				ENSG00000064961	HMG20B	B5MDG7			0	0	0.951	0.983	1.159	0.674	0.563	0.661	0.645	0.97	0.772	1.016	0.964	1.049	0.87	0.779	0.955	1.034	1.219	0.709	0.592	0.695	0.679	1.021
High	Master Protein	A0A1W2PNW1	Signal transducer and activator of transcription (Fragment) OS=Homo sapiens OX=9606 GN=STAT6 PE=1 SV=2	0	FALSE	16.409	9	6	7	6	797	88.8	6.35	15.39	6	signal transduction;other biological processes	nucleus;other cell component	nucleic acid binding activity;other molecular function	Pf00017, Pf01017, Pf02864, Pf02865, Pf14596		ENSG00000166888	STAT6	A0A1W2PNW1		Interactions between immune cells and microRNAs in tumor microenvironment	1	0	1.78	1.166	1.396	1.217	1.339	1.269	1.584	3.079	1.989	2.121	2.817	2.803	2.325	2.267	2.152	0.655	0.784	0.684	0.752	0.713	0.89	1.73
High	Master Protein	M0QZM1	Heterogeneous nuclear ribonucleoprotein M (Fragment) OS=Homo sapiens OX=9606 GN=HNRNPM PE=1 SV=1	0	FALSE	61.492	56	15	47	1	383	40	6.73	91.04	15	RNA metabolism OR transcription;other metabolic processes	nucleus	nucleic acid binding activity	Pf00076		ENSG00000099783	HNRNPM	M0QZM1			0	0
High	Master Protein	Q9NRL3	Striatin-4 OS=Homo sapiens OX=9606 GN=STRN4 PE=1 SV=2	0	FALSE	49.43	27	11	17	9	753	80.5	5.4	43.69	11		other membranes;other cell component	other molecular function	Pf00400, Pf08232	29888	ENSG00000090372	STRN4	A0A024R0V2; B4DQH7; F8VYA6; hsa:29888; Q8NE53; Q9NRL3			0	0	1.014	1.047	1.108	1.003	1.249	0.98	0.803	1.044	1.04	1.16	1.26	1.028	0.963	1.075	1.018	1.032	1.092	0.989	1.231	0.966	0.792	1.03
High	Master Protein	O75695	Protein XRP2 OS=Homo sapiens OX=9606 GN=RP2 PE=1 SV=4	0	FALSE	13.171	15	6	7	6	350	39.6	5.12	15.99	6	cell organization and biogenesis;transport;other biological processes	plasma membrane;other membranes;cytoskeleton;ER/Golgi;nucleus;other cell component	enzyme regulator activity;other molecular function	Pf07986	6102	ENSG00000102218	RP2	hsa:6102; O75695; Q86XJ7; Q9NU67	Trafficking of myristoylated proteins to the cilium	Joubert syndrome; Ciliopathies	3	0	1.013	0.973	1.18	0.922	1.119	1.12	0.952	0.914	1.054	1.035	0.933	0.911	0.971	1.031	0.978	0.961	1.166	0.911	1.105	1.106	0.94	0.902
High	Master Protein	A0A0J9YWL0	Beta/gamma crystallin domain-containing protein 1 OS=Homo sapiens OX=9606 GN=CRYBG1 PE=1 SV=1	0	FALSE	114.337	20	27	39	27	2131	231.6	5.81	109.62	27			other molecular function	Pf00030, Pf00652		ENSG00000112297	CRYBG1	A0A0J9YWL0			0	0	0.897	0.863	1.017	1.455	1.869	1.833	1.563	0.759	0.731	0.752	0.761	0.995	1.051	0.913	1.016	0.962	1.134	1.622	2.084	2.044	1.743	0.847
High	Master Protein	Q8TCT8	Signal peptide peptidase-like 2A OS=Homo sapiens OX=9606 GN=SPPL2A PE=1 SV=2	0	FALSE	14.631	12	4	5	4	520	58.1	8.32	15.96	4	protein metabolism;other biological processes	plasma membrane;other membranes;ER/Golgi;other cytoplasmic organelle;other cell component	other molecular function	Pf02225, Pf04258	84888	ENSG00000138600	SPPL2A	B2RDS0; hsa:84888; Q8TAW1; Q8TCT8; Q96SZ8	Regulation of TNFR1 signaling		1	0	0.91	0.796	0.792	0.815	0.845	0.802	0.838	0.606	0.78	0.718	0.719	0.9	0.804	0.907	0.87	0.875	0.87	0.896	0.929	0.882	0.921	0.666
High	Master Protein	F8W8D3	Histone RNA hairpin-binding protein OS=Homo sapiens OX=9606 GN=SLBP PE=1 SV=1	0	FALSE	6.881	8	2	3	2	277	32.1	7.47	7.2	2	RNA metabolism OR transcription;other metabolic processes	cytosol;nucleus	nucleic acid binding activity	Pf15247		ENSG00000163950	SLBP	F8W8D3			0	0
High	Master Protein	Q9NR33	DNA polymerase epsilon subunit 4 OS=Homo sapiens OX=9606 GN=POLE4 PE=1 SV=2	0	FALSE	11.972	38	2	3	2	117	12.2	4.92	12.33	2	DNA metabolism;other metabolic processes	nucleus	nucleic acid binding activity;other molecular function	Pf00808	56655	ENSG00000115350	POLE4	hsa:56655; Q53TR2; Q9NR33	Dual incision in TC-NER; Gap-filling DNA repair synthesis and ligation in TC-NER; Dual Incision in GG-NER; Activation of the pre-replicative complex; Termination of translesion DNA synthesis; HDR through Homologous Recombination (HRR); Recognition of DNA damage by PCNA-containing replication complex; PCNA-Dependent Long Patch Base Excision Repair; DNA replication initiation; Gap-filling DNA repai…	Pyrimidine metabolism; Base excision repair; Nucleotide excision repair; DNA repair pathways, full network; Nucleotide excision repair in xeroderma pigmentosum ; DNA mismatch repair	16	0	1.183	1.248	0.491	0.689	0.487	0.816	0.492	0.677	0.574	1.426	0.489	0.723	0.978	0.626	0.872	1.055	0.415	0.583	0.411	0.69	0.416	0.572
High	Master Protein	Q5VTR2	E3 ubiquitin-protein ligase BRE1A OS=Homo sapiens OX=9606 GN=RNF20 PE=1 SV=2	0	FALSE	87.104	28	19	33	16	975	113.6	5.94	101.98	19	protein metabolism;other metabolic processes;other biological processes	nucleus;other cell component	nucleic acid binding activity;other molecular function	Pf00097	56254	ENSG00000155827	RNF20	A7MCT5; hsa:56254; Q2TB34; Q5VTR2; Q69YL5; Q6P527; Q8N3J4; Q96JD3; Q9H9Y7; Q9HA51; Q9NUR4; Q9NWQ3; Q9NX83	E3 ubiquitin ligases ubiquitinate target proteins; RHOBTB1 GTPase cycle	ATM signaling in development and disease	3	2	1.112	1.112	0.95	1.359	0.888	0.899	0.969	1.437	1.448	1.415	1.438	1.463	1.418	1.18	1.345	1	0.855	1.223	0.799	0.808	0.872	1.292
Medium	Master Protein	P15923	Transcription factor E2-alpha OS=Homo sapiens OX=9606 GN=TCF3 PE=1 SV=1	0.042	FALSE	1.313	2	1	1	1	654	67.6	6.47	0	1	DNA metabolism;other metabolic processes;developmental processes;other biological processes	nucleus;other cell component	nucleic acid binding activity;other molecular function	Pf00010	6929	ENSG00000071564	TCF3	hsa:6929; P15883; P15923; Q14208; Q14635; Q14636; Q2TB39; Q2TB40; Q9UPI9	RUNX1 regulates transcription of genes involved in differentiation of HSCs; Myogenesis	Ectoderm differentiation; Ectoderm differentiation; Wnt signaling pathway; Wnt/beta-catenin signaling pathway in leukemia; lncRNA in canonical Wnt signaling and colorectal cancer; Sudden infant death syndrome (SIDS) susceptibility pathways	8	0
High	Master Protein	A0A590UJP0	Protection of telomeres protein 1 OS=Homo sapiens OX=9606 GN=POT1 PE=1 SV=1	0	FALSE	5.821	3	1	1	1	509	57.5	8.53	2.44	1	cell organization and biogenesis;DNA metabolism	nucleus;other cell component	nucleic acid binding activity	Pf02765, Pf16686		ENSG00000128513	POT1	A0A590UJP0			0	0	0.868	0.841	1.02	0.635	0.571	0.912	1.448	1.609	1.5	1.3	1.477	1.138	0.92	1.061	0.975	0.969	1.175	0.731	0.658	1.05	1.667	1.853
High	Master Protein	Q5JTZ9	Alanine--tRNA ligase, mitochondrial OS=Homo sapiens OX=9606 GN=AARS2 PE=1 SV=1	0	FALSE	110.98	31	21	53	21	985	107.3	6.27	160	21	protein metabolism;RNA metabolism OR transcription;other metabolic processes	mitochondrion	nucleic acid binding activity;other molecular function	Pf01411, Pf07973	57505	ENSG00000124608	AARS2	A2RRN5; hsa:57505; Q5JTZ9; Q8N198; Q96D02; Q9ULF0	Mitochondrial tRNA aminoacylation		1	0	0.767	0.923	0.738	1.456	1.267	1.383	1.322	0.684	0.838	0.83	0.813	1.093	1.564	1.366	1.526	1.204	0.962	1.898	1.652	1.803	1.724	0.891
Medium	Master Protein	Q9NZQ9	Tropomodulin-4 OS=Homo sapiens OX=9606 GN=TMOD4 PE=2 SV=1	0.027	FALSE	1.534	3	1	1	1	345	39.3	4.75	2.1	1	cell organization and biogenesis;other biological processes	cytoskeleton	cytoskeletal activity	Pf03250	29765	ENSG00000163157	TMOD4	B7Z6N9; hsa:29765; Q5JR83; Q8WVL3; Q9NZQ9; Q9UKH2	Striated Muscle Contraction		1	0
High	Master Protein	F5H6I7	Atlastin-3 OS=Homo sapiens OX=9606 GN=ATL3 PE=1 SV=1	0	FALSE	96.579	42	16	40	15	523	58.7	5.64	110.87	16		other membranes;ER/Golgi	other molecular function	Pf02263, Pf02841	25923	ENSG00000184743	ATL3	F5H6I7			0	0	1.007	0.964	1.038	0.924	0.99	1.013	1.072	0.862	0.9	0.771	0.903	1.136	1.138	1.219	1.246	0.957	1.03	0.917	0.983	1.005	1.064	0.855
Medium	Master Protein	Q6ZTW0	Tubulin polyglutamylase complex subunit 1 OS=Homo sapiens OX=9606 GN=TPGS1 PE=1 SV=2	0.015	FALSE	1.915	4	1	1	1	290	31.3	9.06	2.79	1	cell-cell signaling;cell organization and biogenesis;protein metabolism;other metabolic processes;developmental processes;other biological processes	cytoskeleton;other cell component	cytoskeletal activity;other molecular function		91978	ENSG00000141933	TPGS1	hsa:91978; Q6ZTW0; Q96GE2	Carboxyterminal post-translational modifications of tubulin		1	0
High	Master Protein	Q8NFT2	Metalloreductase STEAP2 OS=Homo sapiens OX=9606 GN=STEAP2 PE=1 SV=3	0.001	FALSE	4.375	3	2	4	2	490	56	9.2	5.99	2	transport;other biological processes	plasma membrane;other membranes;cytosol;ER/Golgi;other cytoplasmic organelle	other molecular function	Pf01794, Pf03807	261729	ENSG00000157214	STEAP2	A4D1F1; G5E9C6; hsa:261729; Q6UXN6; Q6YPB1; Q8IUE7; Q8NFT2	Transferrin endocytosis and recycling	Copper homeostasis	2	0
High	Master Protein	Q5JUW8	Discs, large homolog 3 (Neuroendocrine-dlg, Drosophila), isoform CRA_b OS=Homo sapiens OX=9606 GN=DLG3 PE=1 SV=1	0	FALSE	6.915	2	1	2	1	849	93.5	7.05	5.21	1	cell organization and biogenesis;other biological processes	plasma membrane;other membranes;other cell component	signal transduction activity or receptor binding;other molecular function	Pf00018, Pf00595, Pf00625, Pf10600, Pf10608		ENSG00000082458	DLG3	Q5JUW8			0	0	1.099	1.13	1.741	2.106	1.721	1.701	1.496	1.723	1.516	1.924	1.578	1.226	1.39	1.351	1.16	1.028	1.584	1.916	1.565	1.547	1.36	1.567
High	Master Protein	P52739	Zinc finger protein 131 OS=Homo sapiens OX=9606 GN=ZNF131 PE=1 SV=2	0.004	FALSE	2.558	2	1	1	1	623	71.4	5.19	2.32	1	other biological processes	cytoskeleton;nucleus	nucleic acid binding activity;other molecular function	Pf00651, Pf12874	7690	ENSG00000172262	ZNF131	B4DRL3; hsa:7690; P52739; Q6PIF0	SUMOylation of transcription cofactors		1	0
High	Master Protein	A0A1B0GTG2	Alpha-aminoadipic semialdehyde dehydrogenase OS=Homo sapiens OX=9606 GN=ALDH7A1 PE=1 SV=1	0	FALSE	49.456	29	12	21	12	536	58.1	8.13	52.88	12		cytosol;mitochondrion	other molecular function	Pf00171		ENSG00000164904	ALDH7A1	A0A1B0GTG2		Amino acid metabolism; Vitamin B6-dependent and responsive disorders; Cerebral organic acidurias, including diseases	3	0	0.713	0.873	0.899	1.35	1.541	1.613	1.61	0.836	1.052	0.879	0.957	0.784	0.986	0.817	0.971	1.224	1.26	1.893	2.16	2.261	2.256	1.172
High	Master Protein	O00629	Importin subunit alpha-3 OS=Homo sapiens OX=9606 GN=KPNA4 PE=1 SV=1	0	FALSE	60.716	39	10	19	7	521	57.9	4.96	63.67	10	transport;other biological processes	other membranes;cytosol;nucleus	other molecular function	Pf00514, Pf01749, Pf16186	3840	ENSG00000186432	KPNA4	A8K4S6; D3DNM2; hsa:3840; O00190; O00629	ISG15 antiviral mechanism; NS1 Mediated Effects on Host Pathways	Leptin signaling pathway	3	0	1.256	1.295	1.199	0.864	0.804	0.869	0.949	2.71	2.175	2.244	2.496	2.312	1.864	2.069	1.75	1.032	0.955	0.688	0.64	0.692	0.755	2.159
High	Master Protein	Q9NZU0	Leucine-rich repeat transmembrane protein FLRT3 OS=Homo sapiens OX=9606 GN=FLRT3 PE=1 SV=1	0	FALSE	11.549	4	2	4	2	649	73	7.64	13.44	2	cell adhesion;cell organization and biogenesis;stress response;developmental processes;signal transduction;other biological processes	non-structural extracellular;extracellular matrix;plasma membrane;other membranes;cytosol;ER/Golgi;other cell component	signal transduction activity or receptor binding;other molecular function	Pf13855	23767	ENSG00000125848	FLRT3	D3DW20; hsa:23767; Q542Z9; Q96K39; Q96K42; Q96KB1; Q9NZU0; Q9P259	Signaling by ROBO receptors; Downstream signaling of activated FGFR1		2	0	0.858	0.847	0.719	1.798	1.967	1.425	1.439	0.937	0.988	0.665	1.018	1.099	0.937	1.028	0.77	0.987	0.838	2.094	2.291	1.66	1.677	1.091
High	Master Protein	Q53S48	Stonin-1 OS=Homo sapiens OX=9606 GN=STON1-GTF2A1L PE=3 SV=1	0	FALSE	6.4	2	2	3	1	1182	132	5.34	4.07	2	RNA metabolism OR transcription;other metabolic processes;transport	nucleus;other cell component		Pf00928, Pf03153	286749	ENSG00000068781	STON1-GTF2A1L	Q53S48			0	1	1.013	1.14	1.355	0.741	1.454	1.393	1.397	1.386	1.356	1.305	1.369	0.735	0.728	0.796	0.811	1.125	1.337	0.731	1.435	1.375	1.378	1.368
Medium	Master Protein	K7EIG3	Palmitoleoyl-protein carboxylesterase NOTUM (Fragment) OS=Homo sapiens OX=9606 GN=NOTUM PE=1 SV=1	0.032	FALSE	1.433	5	1	1	1	197	22.4	8.25	0	1			other molecular function	Pf03283		ENSG00000185269	NOTUM	K7EIG3		lncRNA in canonical Wnt signaling and colorectal cancer; Wnt signaling; ncRNAs involved in Wnt signaling in hepatocellular carcinoma; Malignant pleural mesothelioma	4	0
High	Master Protein	Q12986	Transcriptional repressor NF-X1 OS=Homo sapiens OX=9606 GN=NFX1 PE=1 SV=2	0	FALSE	12.978	5	4	5	4	1120	124.3	8.24	11.21	4	protein metabolism;RNA metabolism OR transcription;other metabolic processes;stress response;other biological processes	plasma membrane;other membranes;cytosol;nucleus;other cell component	nucleic acid binding activity;other molecular function	Pf01422, Pf01424	4799	ENSG00000086102	NFX1	A8K6H8; hsa:4799; Q12986; Q5VXW6; Q96EL5; Q9BXI1		Fas ligand pathway and stress induction of heat shock proteins	1	0	1.006	1.106	0.867	0.759	0.663	0.71	0.727	1.235	1.116	1.372	1.194	1.018	1.099	1.2	1.102	1.099	0.862	0.754	0.659	0.705	0.723	1.228
Medium	Master Protein	A2A341	Synaptonemal complex protein 2 (Fragment) OS=Homo sapiens OX=9606 GN=SYCP2 PE=1 SV=1	0.016	FALSE	1.858	2	1	1	1	1023	116.5	9.31	2.14	1		nucleus;other cell component		Pf18581, Pf18584		ENSG00000196074	SYCP2	A2A341			0	0
High	Master Protein	P35590	Tyrosine-protein kinase receptor Tie-1 OS=Homo sapiens OX=9606 GN=TIE1 PE=1 SV=1	0	FALSE	33.634	8	8	17	8	1138	125	7.03	43.29	8	cell organization and biogenesis;protein metabolism;other metabolic processes;developmental processes;signal transduction;other biological processes	plasma membrane;other membranes;other cell component	kinase activity;other molecular function	Pf00041, Pf00047, Pf07714	7075	ENSG00000066056	TIE1	B5A949; B5A950; hsa:7075; P35590		RAC1/PAK1/p38/MMP2 pathway	1	0	0.888	0.876	1.032	0.552	1.053	1.008	0.946	0.315	0.335	0.302	0.314	0.696	0.802	0.815	0.837	0.986	1.161	0.621	1.185	1.134	1.065	0.355
High	Master Protein	Q9HCE5	N6-adenosine-methyltransferase non-catalytic subunit OS=Homo sapiens OX=9606 GN=METTL14 PE=1 SV=2	0	FALSE	12.569	9	3	6	3	456	52.1	6.21	15.32	3	RNA metabolism OR transcription;other metabolic processes;developmental processes;other biological processes	nucleus;other cell component	nucleic acid binding activity;other molecular function	Pf05063	57721	ENSG00000145388	METTL14	A6NIG1; hsa:57721; Q969V2; Q9HCE5	Processing of Capped Intron-Containing Pre-mRNA		1	0	1.019	1.267	1.007	0.687	0.691	0.82	0.971	1.753	1.664	0.905	1.419	1.789	1.511	0.713	1.225	1.244	0.989	0.674	0.679	0.805	0.954	1.721
High	Master Protein	O00159	Unconventional myosin-Ic OS=Homo sapiens OX=9606 GN=MYO1C PE=1 SV=4	0	FALSE	205.498	52	45	102	43	1063	121.6	9.41	263.35	45	cell organization and biogenesis;stress response;transport;signal transduction;other biological processes	plasma membrane;other membranes;cytosol;cytoskeleton;nucleus;other cell component	signal transduction activity or receptor binding;cytoskeletal activity;other molecular function	Pf00063, Pf00612, Pf06017	4641	ENSG00000197879	MYO1C	hsa:4641; O00159; Q4LE56; Q6NVJ7; Q86Y95	Regulation of actin dynamics for phagocytic cup formation; FCGR3A-mediated phagocytosis; Sensory processing of sound by inner hair cells of the cochlea; Sensory processing of sound by outer hair cells of the cochlea; Translocation of SLC2A4 (GLUT4) to the plasma membrane	VEGFA-VEGFR2 signaling pathway; Insulin signaling	7	2	1.059	0.956	1.049	1.04	1.09	1.061	1.163	0.919	1.048	0.884	0.992	0.911	1.023	0.975	0.885	0.903	0.99	0.981	1.029	1.001	1.097	0.867
High	Master Protein	Q9NZJ4	Sacsin OS=Homo sapiens OX=9606 GN=SACS PE=1 SV=2	0	FALSE	147.636	12	41	71	41	4579	520.8	7.05	175.13	41	other biological processes	mitochondrion;nucleus;other cell component	other molecular function	Pf00240, Pf05168	26278	ENSG00000151835	SACS	hsa:26278; O94835; Q5T9J5; Q5T9J7; Q5T9J8; Q68DF5; Q6MZR4; Q8NBF9; Q9NZJ4			0	0	1.039	1.073	0.976	0.97	1.205	1.115	1.134	1.188	1.208	1.214	1.228	1.136	1.062	1.093	1.094	1.032	0.939	0.933	1.16	1.073	1.092	1.143
High	Master Protein	P05388	60S acidic ribosomal protein P0 OS=Homo sapiens OX=9606 GN=RPLP0 PE=1 SV=1	0	FALSE	82.007	65	15	39	15	317	34.3	5.97	111.01	15	cell organization and biogenesis;protein metabolism;RNA metabolism OR transcription;other metabolic processes;transport;signal transduction;other biological processes	cytosol;ER/Golgi;translational apparatus;nucleus;other cell component	nucleic acid binding activity;other molecular function	Pf00428, Pf00466, Pf17777	6175	ENSG00000089157	RPLP0	hsa:6175; P05388; Q3B7A4; Q9BVK4	Regulation of expression of SLITs and ROBOs; Gene and protein expression by JAK-STAT signaling after Interleukin-12 stimulation; L13a-mediated translational silencing of Ceruloplasmin expression; Formation of a pool of free 40S subunits; GTP hydrolysis and joining of the 60S ribosomal subunit; Major pathway of rRNA processing in the nucleolus and cytosol; Nonsense Mediated Decay (NMD) enhanced by…	Cytoplasmic ribosomal proteins	15	0	1.058	0.999	0.788	1.055	0.895	0.866	0.973	0.751	0.697	0.743	0.703	0.912	0.777	0.842	0.787	0.944	0.745	0.997	0.845	0.818	0.919	0.71
High	Master Protein	O95164	Ubiquitin-like protein 3 OS=Homo sapiens OX=9606 GN=UBL3 PE=1 SV=1	0.002	FALSE	2.978	10	1	3	1	117	13.1	6.77	7.51	1		plasma membrane;other membranes		Pf13881	5412	ENSG00000122042	UBL3	B2R4J1; hsa:5412; O95164; Q5RL72; Q5VZS0; Q6FIG8; Q96SG7			0	0
High	Master Protein	Q13445	Transmembrane emp24 domain-containing protein 1 OS=Homo sapiens OX=9606 GN=TMED1 PE=1 SV=1	0	FALSE	25.967	30	4	13	4	227	25.2	4.48	50.31	4	cell-cell signaling;cell organization and biogenesis;transport;signal transduction	plasma membrane;other membranes;ER/Golgi;other cell component	signal transduction activity or receptor binding	Pf01105	11018	ENSG00000099203	TMED1	hsa:11018; Q13445		Ciliary landscape	1	0	0.976	0.929	1.105	1.011	1.163	1.058	1.119	1.039	1.067	1.075	1.19	1.409	1.311	1.671	1.626	0.952	1.132	1.036	1.192	1.084	1.147	1.065
High	Master Protein	Q8IVQ6	Palmitoyltransferase ZDHHC21 OS=Homo sapiens OX=9606 GN=ZDHHC21 PE=2 SV=1	0	FALSE	5.664	11	3	4	3	265	31.4	8.44	4.23	3	protein metabolism;other metabolic processes;transport;developmental processes;signal transduction;other biological processes	plasma membrane;other membranes;ER/Golgi	other molecular function	Pf01529	340481	ENSG00000175893	ZDHHC21	A8KA95; D3DRI7; hsa:340481; Q5VWG1; Q8IVQ6	Extra-nuclear estrogen signaling; eNOS activation		2	0	1.097	0.918	1.087	1.061	1.261	1.246	1.407	1.022	1.019	0.976	0.877	0.998	1.041	1.208	1.422	0.837	0.991	0.967	1.15	1.136	1.282	0.932
Medium	Master Protein	Q15048	Leucine-rich repeat-containing protein 14 OS=Homo sapiens OX=9606 GN=LRRC14 PE=1 SV=1	0.038	FALSE	1.37	2	1	1	1	493	54.5	6.9	0	1	other biological processes	other cell component	other molecular function	Pf13516	9684	ENSG00000160959	LRRC14	A8K0A8; D3DWM8; hsa:9684; Q15048			0	0
High	Master Protein	P49848	Transcription initiation factor TFIID subunit 6 OS=Homo sapiens OX=9606 GN=TAF6 PE=1 SV=1	0	FALSE	24.325	8	4	6	4	677	72.6	8.6	19.83	4	protein metabolism;RNA metabolism OR transcription;other metabolic processes;other biological processes	cytosol;nucleus;other cell component	signal transduction activity or receptor binding;nucleic acid binding activity;other molecular function	Pf02969, Pf07571	6878	ENSG00000106290	TAF6	A4D2B2; A4D2B3; B4DT11; D6W5U2; hsa:6878; P49848; Q6AI29	RNA Polymerase II Pre-transcription Events; RNA polymerase II transcribes snRNA genes; HIV Transcription Initiation; RNA Polymerase II HIV Promoter Escape; RNA Polymerase II Promoter Escape; RNA Polymerase II Transcription Pre-Initiation And Promoter Opening; RNA Polymerase II Transcription Initiation; Regulation of TP53 Activity through Phosphorylation	Eukaryotic transcription initiation	11	0	0.932	0.978	1.408	0.797	0.821	0.808	0.687	1.265	0.905	1.195	1.316	1.317	0.993	0.974	1.186	1.049	1.51	0.855	0.881	0.867	0.737	1.357
High	Master Protein	A0A0A0MT01	Gelsolin OS=Homo sapiens OX=9606 GN=GSN PE=1 SV=1	0	TRUE	28.199	15	9	18	9	767	84.7	5.83	42.03	9	cell organization and biogenesis;other biological processes		cytoskeletal activity;other molecular function	Pf00626	2934	ENSG00000148180	GSN	A0A0A0MT01		Ebola virus pathway in host; Regulation of actin cytoskeleton; Senescence and autophagy in cancer	3	0	0.871	0.951	2.264	0.452	1.549	1.47	1.295	1.299	1.338	1.321	1.282	1.144	1.115	1.137	1.239	1.092	2.6	0.519	1.779	1.689	1.487	1.492
High	Master Protein	Q9BXJ9	N-alpha-acetyltransferase 15, NatA auxiliary subunit OS=Homo sapiens OX=9606 GN=NAA15 PE=1 SV=1	0	FALSE	126.268	36	32	63	32	866	101.2	7.42	161.9	32	protein metabolism;other metabolic processes;developmental processes;other biological processes	cytosol;nucleus;other cell component	translation activity	Pf12569, Pf13181	80155	ENSG00000164134	NAA15	D3DNY6; hsa:80155; Q52LG9; Q8IWH4; Q8NEV2; Q9BXJ9; Q9H8P6			0	0	1.018	1.051	0.847	0.976	0.997	0.931	1.056	1.047	1.031	0.966	1.009	0.867	0.851	0.793	0.761	1.032	0.831	0.958	0.979	0.915	1.037	1.028
High	Master Protein	Q5TI25	Neuroblastoma breakpoint family member 14 OS=Homo sapiens OX=9606 GN=NBPF14 PE=2 SV=2	0	FALSE	9.769	10	4	4	4	921	105.8	4.58	9.65	4		other cell component		Pf06758			NBPF14	Q5TI23; Q5TI25; Q8IX76; Q9UJI9			0	0	1.24	1.189	1.299	1.327	1.423	1.432	1.139	0.762	0.818	0.757	0.641	1.15	1.188	1.482	1.092	0.959	1.047	1.07	1.148	1.155	0.919	0.615
High	Master Protein	Q9BT92	Trichoplein keratin filament-binding protein OS=Homo sapiens OX=9606 GN=TCHP PE=1 SV=1	0.001	FALSE	4.09	2	1	1	1	498	61	6.54	3.48	1	cell organization and biogenesis;other biological processes	plasma membrane;other membranes;cytosol;cytoskeleton;mitochondrion;other cell component		Pf13868	84260	ENSG00000139437	TCHP	hsa:84260; Q8NAG0; Q9BT92			0	0
High	Master Protein	P06865	Beta-hexosaminidase subunit alpha OS=Homo sapiens OX=9606 GN=HEXA PE=1 SV=2	0	FALSE	50.011	26	12	22	12	529	60.7	5.16	56.37	12	protein metabolism;other metabolic processes	cytosol;other cytoplasmic organelle;other cell component	other molecular function	Pf00728, Pf14845	3073	ENSG00000213614	HEXA	B4DKE7; E7ENH7; hsa:3073; P06865; Q53HS8; Q6AI32	Glycosphingolipid metabolism; CS/DS degradation; Hyaluronan uptake and degradation; Keratan sulfate degradation; Defective HEXA causes GM2G1	Degradation pathway of sphingolipids, including diseases; Glycosaminoglycan degradation	7	0	0.855	0.836	0.991	0.993	1.186	1.084	1.317	0.53	0.618	0.555	0.58	0.804	0.99	1.025	1.02	0.978	1.159	1.161	1.388	1.268	1.541	0.62
High	Master Protein	Q9BZE9	Tether containing UBX domain for GLUT4 OS=Homo sapiens OX=9606 GN=ASPSCR1 PE=1 SV=1	0	FALSE	16.233	10	4	5	4	553	60.1	6.64	15.86	4	transport;other biological processes	plasma membrane;other membranes;cytosol;ER/Golgi;nucleus;other cell component		Pf00789, Pf11470	79058	ENSG00000169696	ASPSCR1	A8K3K9; hsa:79058; Q7Z6N7; Q8WV59; Q96LS5; Q96M40; Q9BZE9	Translocation of SLC2A4 (GLUT4) to the plasma membrane		1	0	1.295	1.12	0.578	0.423	1.62	1.254	1.204	2.397	2.717	2.375	2.465	1.89	1.664	2.495	2.006	0.865	0.447	0.326	1.251	0.969	0.93	1.852
High	Master Protein	Q5T7V8	RAB6-interacting golgin OS=Homo sapiens OX=9606 GN=GORAB PE=1 SV=1	0	FALSE	12.858	18	4	7	4	394	45	7.08	17.74	4											0	0
High	Master Protein	O15226	NF-kappa-B-repressing factor OS=Homo sapiens OX=9606 GN=NKRF PE=1 SV=2	0	FALSE	49.542	23	15	24	15	690	77.6	8.79	58.71	15	other biological processes	nucleus	nucleic acid binding activity;other molecular function	Pf01424, Pf01585	55922	ENSG00000186416	NKRF	G3V1N1; hsa:55922; O15226; Q4VC41; Q9UJ91		Pathogenesis of SARS-CoV-2 mediated by nsp9-nsp10 complex; Network map of SARS-CoV-2 signaling pathway	2	0	1.193	1.192	1.188	0.86	0.924	0.886	0.955	1.226	1.063	1.083	1.191	1.394	1.183	1.136	1.297	0.999	0.996	0.721	0.774	0.743	0.801	1.028
High	Master Protein	P20248	Cyclin-A2 OS=Homo sapiens OX=9606 GN=CCNA2 PE=1 SV=2	0	FALSE	18.739	18	6	7	6	432	48.5	6.54	18.75	6	cell cycle OR cell proliferation;protein metabolism;other metabolic processes;stress response;developmental processes;signal transduction;other biological processes	cytosol;nucleus;other cell component	enzyme regulator activity;other molecular function	Pf00134, Pf02984, Pf16500	890	ENSG00000145386	CCNA2	A8K7B6; hsa:890; P20248; Q2M3U6; Q4W5P4; Q6LER8	Senescence-Associated Secretory Phenotype (SASP); TP53 Regulates Transcription of Genes Involved in G1 Cell Cycle Arrest; Cdc20:Phospho-APC/C mediated degradation of Cyclin A; Ub-specific processing proteases; Orc1 removal from chromatin; CDK-mediated phosphorylation and removal of Cdc6; Regulation of TP53 Degradation; SCF(Skp2)-mediated degradation of p27/p21; Regulation of TP53 Activity through…	AMP-activated protein kinase (AMPK) signaling; Cell cycle; Retinoblastoma gene in cancer; IL-18 signaling pathway	24	0	1.162	1.083	1.065	1.139	0.781	0.939	0.881	1.524	1.34	1.697	1.327	1.804	1.423	1.288	1.479	0.932	0.916	0.98	0.672	0.808	0.758	1.312
High	Master Protein	Q8WUI4	Histone deacetylase 7 OS=Homo sapiens OX=9606 GN=HDAC7 PE=1 SV=2	0	FALSE	30.597	12	8	12	8	952	102.9	7.58	35.14	8	protein metabolism;RNA metabolism OR transcription;other metabolic processes;other biological processes	cytosol;nucleus;other cell component	other molecular function	Pf00850	51564	ENSG00000061273	HDAC7	B3KY08; B4DWI0; B4E0Q5; hsa:51564; Q6P1W9; Q6W9G7; Q7Z4K2; Q7Z5I1; Q8WUI4; Q96K01; Q9BR73; Q9H7L0; Q9NW41; Q9NWA9; Q9NYK9; Q9UFU7	Regulation of PTEN gene transcription; SUMOylation of DNA damage response and repair proteins; Constitutive Signaling by NOTCH1 PEST Domain Mutants; Constitutive Signaling by NOTCH1 HD+PEST Domain Mutants; NOTCH1 Intracellular Domain Regulates Transcription; Notch-HLH transcription pathway	MicroRNAs in cardiomyocyte hypertrophy; Neural crest differentiation; Cardiac hypertrophic response; Initiation of transcription and translation elongation at the HIV-1 LTR; VEGFA-VEGFR2 signaling pathway; Ethanol effects on histone modifications; Gastrin signaling pathway	13	0
High	Master Protein	Q8NCW6	Polypeptide N-acetylgalactosaminyltransferase 11 OS=Homo sapiens OX=9606 GN=GALNT11 PE=1 SV=2	0	FALSE	6.665	6	3	3	3	608	68.9	8.19	5.31	3	cell organization and biogenesis;protein metabolism;other metabolic processes;developmental processes;signal transduction;other biological processes	other membranes;ER/Golgi	signal transduction activity or receptor binding;other molecular function	Pf00535, Pf00652	63917	ENSG00000178234	GALNT11	B3KWF4; hsa:63917; Q6PCD1; Q8NCW6; Q9H6C2; Q9H6Z5; Q9UDR8	O-linked glycosylation of mucins	Ciliopathies	2	0
High	Master Protein	P34059	N-acetylgalactosamine-6-sulfatase OS=Homo sapiens OX=9606 GN=GALNS PE=1 SV=1	0.001	FALSE	4.56	6	2	2	2	522	58	6.74	2.77	2	other metabolic processes;transport	non-structural extracellular;other cytoplasmic organelle	other molecular function	Pf00884, Pf14707	2588	ENSG00000141012	GALNS	hsa:2588; P34059; Q86VK3	Neutrophil degranulation; Keratan sulfate degradation; MPS IV - Morquio syndrome A	Glycosaminoglycan degradation	4	0	1.103	1.058	1.23	0.569	0.656	0.619	0.572	0.404	0.475	0.407	0.687	0.67	0.755	0.604	0.939	0.959	1.115	0.516	0.594	0.561	0.518	0.366
High	Master Protein	O00327	Aryl hydrocarbon receptor nuclear translocator-like protein 1 OS=Homo sapiens OX=9606 GN=ARNTL PE=1 SV=2	0.001	FALSE	4.131	4	1	1	1	626	68.7	6.86	4.05	1	protein metabolism;other metabolic processes;stress response;developmental processes;other biological processes	nucleus;other cell component	signal transduction activity or receptor binding;nucleic acid binding activity;other molecular function	Pf00010, Pf00989, Pf14598	406	ENSG00000133794	ARNTL	A2I2N6; A8K645; B5ME11; B7WPG7; D3DQW6; hsa:406; O00313; O00314; O00315; O00316; O00317; O00327; Q4G136; Q8IUT4; Q99631; Q99649	PPARA activates gene expression; Heme signaling; BMAL1:CLOCK,NPAS2 activates circadian gene expression	Melatonin metabolism and effects; Exercise-induced circadian regulation; 22q11.2 copy number variation syndrome; Male infertility; Hedgehog signaling pathway Netpath	9	0
High	Master Protein	P17302	Gap junction alpha-1 protein OS=Homo sapiens OX=9606 GN=GJA1 PE=1 SV=2	0	FALSE	48.094	32	8	15	8	382	43	8.76	47.69	8	cell-cell signaling;cell cycle OR cell proliferation;cell organization and biogenesis;stress response;transport;developmental processes;signal transduction;other biological processes	plasma membrane;other membranes;mitochondrion;ER/Golgi;nucleus;other cytoplasmic organelle;other cell component	transporter activity;cytoskeletal activity;other molecular function	Pf00029, Pf03508	2697	ENSG00000152661	GJA1	B2R5U9; hsa:2697; P17302; Q6FHU1; Q9Y5I8	Microtubule-dependent trafficking of connexons from Golgi to the plasma membrane; RHOQ GTPase cycle; RHOJ GTPase cycle; Oligomerization of connexins into connexons; Transport of connexins along the secretory pathway; Formation of annular gap junctions; Regulation of gap junction activity	Genes targeted by miRNAs in adipocytes; Arrhythmogenic right ventricular cardiomyopathy; Corticotropin-releasing hormone signaling pathway; Spinal cord injury; Myometrial relaxation and contraction pathways; Wnt signaling pathway; VEGFA-VEGFR2 signaling pathway; EGF/EGFR signaling pathway; 1q21.1 copy number variation syndrome; Calcium regulation in cardiac cells; Sudden infant death syndrome (SI…	20	0	0.832	0.912	1.266	0.928	1.183	1.18	0.966	0.511	0.508	0.543	0.499	0.689	0.875	0.684	0.799	1.096	1.521	1.115	1.422	1.418	1.161	0.615
High	Master Protein	B8ZWD1	Acyl-CoA-binding protein OS=Homo sapiens OX=9606 GN=DBI PE=1 SV=1	0.002	FALSE	3.297	21	1	2	1	97	11.1	8.32	4.39	1			other molecular function	Pf00887	1622	ENSG00000155368	DBI	B8ZWD1		Sterol regulatory element-binding proteins (SREBP) signaling; PPAR-alpha pathway; Nuclear receptors meta-pathway; PPAR signaling pathway; Fatty acid transporters	5	0
High	Master Protein	Q14651	Plastin-1 OS=Homo sapiens OX=9606 GN=PLS1 PE=1 SV=2	0	FALSE	54.909	27	14	30	11	629	70.2	5.41	82.47	14	cell organization and biogenesis;transport;developmental processes;other biological processes	cytoskeleton;other cell component	cytoskeletal activity;other molecular function	Pf00036, Pf00307, Pf13833	5357	ENSG00000120756	PLS1	A8K2Q1; D3DNG3; hsa:5357; Q14651; Q8NEG6	Sensory processing of sound by inner hair cells of the cochlea; Sensory processing of sound by outer hair cells of the cochlea		2	0	1.052	1.02	1.044	0.886	0.701	0.735	0.656	1.99	1.851	1.831	2.049	1.503	1.563	1.371	1.424	0.97	0.992	0.842	0.666	0.698	0.624	1.891
High	Master Protein	Q9Y333	U6 snRNA-associated Sm-like protein LSm2 OS=Homo sapiens OX=9606 GN=LSM2 PE=1 SV=1	0	FALSE	10.204	36	3	5	3	95	10.8	6.52	13.61	3	cell organization and biogenesis;RNA metabolism OR transcription;other metabolic processes	cytosol;nucleus;other cell component	nucleic acid binding activity;other molecular function	Pf01423	57819	ENSG00000172850; ENSG00000204392; ENSG00000224979; ENSG00000225998; ENSG00000231502; ENSG00000236826	LSM2	hsa:57819; Q6FGG1; Q9Y333	mRNA Splicing - Major Pathway; mRNA Splicing - Minor Pathway; mRNA decay by 5' to 3' exoribonuclease	mRNA processing	4	0	0.923	0.961	1.102	0.964	0.877	0.885	0.982	1.512	1.259	1.291	1.424	1.324	1.178	1.059	1.25	1.042	1.195	1.044	0.95	0.96	1.065	1.639
High	Master Protein	O60239	SH3 domain-binding protein 5 OS=Homo sapiens OX=9606 GN=SH3BP5 PE=1 SV=2	0.009	FALSE	2.186	3	1	2	1	455	50.4	4.97	3.93	1	signal transduction;other biological processes	other membranes;mitochondrion;nucleus;other cell component	enzyme regulator activity;other molecular function	Pf05276	9467	ENSG00000131370	SH3BP5	B3KQW6; hsa:9467; O60239; Q5JWV9			0	0
High	Master Protein	O75347	Tubulin-specific chaperone A OS=Homo sapiens OX=9606 GN=TBCA PE=1 SV=3	0	FALSE	20.543	35	6	14	6	108	12.8	5.29	40.65	6	cell organization and biogenesis;other biological processes	cytosol;cytoskeleton;nucleus;other cell component	cytoskeletal activity;other molecular function	Pf02970	6902	ENSG00000171530	TBCA	B4DT30; hsa:6902; O75347	Post-chaperonin tubulin folding pathway	VEGFA-VEGFR2 signaling pathway	2	0	0.906	0.958	0.817	0.375	0.712	0.689	0.7	0.49	0.548	0.552	0.502	0.475	0.588	0.6	0.553	1.058	0.902	0.414	0.786	0.761	0.773	0.54
High	Master Protein	P14625	Endoplasmin OS=Homo sapiens OX=9606 GN=HSP90B1 PE=1 SV=1	0	FALSE	355.857	66	52	514	50	803	92.4	4.84	1331.56	52	cell organization and biogenesis;protein metabolism;other metabolic processes;stress response;transport;signal transduction;other biological processes	non-structural extracellular;other membranes;cytosol;ER/Golgi;other cell component	signal transduction activity or receptor binding;nucleic acid binding activity;other molecular function	Pf00183, Pf02518	7184	ENSG00000166598	HSP90B1	hsa:7184; P14625; Q96A97	Regulation of Insulin-like Growth Factor (IGF) transport and uptake by Insulin-like Growth Factor Binding Proteins (IGFBPs); Post-translational protein phosphorylation; Interleukin-4 and Interleukin-13 signaling; Trafficking and processing of endosomal TLR; Scavenging by Class A Receptors; ATF6 (ATF6-alpha) activates chaperone genes	Photodynamic therapy-induced unfolded protein response; Focal adhesion: PI3K-Akt-mTOR-signaling pathway; Prion disease pathway; PI3K-Akt signaling pathway; Sudden infant death syndrome (SIDS) susceptibility pathways	11	2	0.884	0.831	0.91	0.984	0.962	0.988	0.948	0.375	0.449	0.421	0.409	0.502	0.654	0.606	0.674	0.94	1.029	1.112	1.088	1.117	1.072	0.424
High	Master Protein	Q14203	Dynactin subunit 1 OS=Homo sapiens OX=9606 GN=DCTN1 PE=1 SV=3	0	FALSE	184.048	33	31	69	31	1278	141.6	5.81	226.34	31	cell cycle OR cell proliferation;cell organization and biogenesis;stress response;transport;developmental processes;signal transduction;other biological processes	non-structural extracellular;cytosol;cytoskeleton;nucleus;other cell component	cytoskeletal activity;other molecular function	Pf01302, Pf12455	1639	ENSG00000204843	DCTN1	A8MY36; B4DM45; E9PFS5; E9PGE1; G5E9H4; hsa:1639; O95296; Q14203; Q6IQ37; Q9BRM9; Q9UIU1; Q9UIU2	MHC class II antigen presentation; HSP90 chaperone cycle for steroid hormone receptors (SHR) in the presence of ligand; COPI-mediated anterograde transport; COPI-independent Golgi-to-ER retrograde traffic; Signaling by ALK fusions and activated point mutants; XBP1(S) activates chaperone genes		6	0	1.05	1.086	1.08	1.136	1.093	1.001	1.048	1.68	1.571	1.774	1.677	1.328	1.184	1.32	1.213	1.034	1.028	1.082	1.041	0.953	0.999	1.6
High	Master Protein	Q6PCB7	Long-chain fatty acid transport protein 1 OS=Homo sapiens OX=9606 GN=SLC27A1 PE=1 SV=1	0	FALSE	26.028	13	6	8	6	646	71.1	8.53	25.06	6	other metabolic processes;stress response;transport;signal transduction;other biological processes	plasma membrane;other membranes;ER/Golgi	transporter activity;other molecular function	Pf00501, Pf13193	376497	ENSG00000130304	SLC27A1	A6NIH2; B7Z662; hsa:376497; Q6PCB7	PPARA activates gene expression; Transport of fatty acids	PPAR-alpha pathway; Nuclear receptors meta-pathway; PPAR signaling pathway	5	0	0.833	0.9	1.397	0.83	1.142	1.275	0.97	0.432	0.438	0.522	0.582	0.587	0.649	0.595	0.622	1.081	1.678	0.997	1.371	1.532	1.165	0.519
Medium	Master Protein	H0YEK4	Amino acid transporter (Fragment) OS=Homo sapiens OX=9606 GN=SLC1A2 PE=1 SV=2	0.022	FALSE	1.656	2	1	1	1	574	62.2	6.8	0	1	transport	other membranes	transporter activity	Pf00375		ENSG00000110436	SLC1A2	H0YEK4			0	0
High	Master Protein	Q86WC4	Osteopetrosis-associated transmembrane protein 1 OS=Homo sapiens OX=9606 GN=OSTM1 PE=1 SV=1	0	FALSE	8.872	9	3	6	3	334	37.2	6.01	13.89	3	transport;developmental processes	other membranes;cytosol;other cytoplasmic organelle		Pf09777	28962	ENSG00000081087	OSTM1	E1P5E3; hsa:28962; Q5R391; Q6PCA7; Q7RTW6; Q86WC4; Q8NC29; Q8TC82; Q9Y2S9	Stimuli-sensing channels	Autosomal recessive osteopetrosis pathways	2	0	1.372	1.107	1.066	1.494	1.103	1.239	1.338	0.802	0.9	0.872	0.835	1.103	1.319	1.215	1.044	0.807	0.777	1.089	0.804	0.904	0.975	0.585
High	Master Protein	J3QRU1	Tyrosine-protein kinase OS=Homo sapiens OX=9606 GN=YES1 PE=1 SV=1	0	FALSE	77.215	50	17	36	11	548	61.3	6.57	103.57	17	protein metabolism;other metabolic processes	plasma membrane;other membranes;cytosol;other cell component	signal transduction activity or receptor binding;kinase activity;other molecular function	Pf00017, Pf00018, Pf07714		ENSG00000176105	YES1	J3QRU1		NRF2-ARE regulation	1	3	1.029	0.952	0.907	0.837	0.913	0.902	0.912	0.709	0.82	0.758	0.747	0.67	0.793	0.798	0.774	0.926	0.882	0.814	0.888	0.877	0.886	0.689
High	Master Protein	K7ELY2	Syntaxin-10 (Fragment) OS=Homo sapiens OX=9606 GN=STX10 PE=1 SV=1	0	FALSE	50.369	65	7	27	6	201	22.5	4.82	70.66	7	cell organization and biogenesis;transport	other membranes;ER/Golgi	other molecular function	Pf09177		ENSG00000104915	STX10	K7ELY2			0	0	0.987	0.978	1.09	0.871	1.074	1.134	1.001	0.531	0.504	0.609	0.581	0.655	0.67	0.754	0.764	0.991	1.104	0.882	1.088	1.149	1.014	0.538
High	Master Protein	Q92540	Protein SMG7 OS=Homo sapiens OX=9606 GN=SMG7 PE=1 SV=2	0	FALSE	32.613	12	9	12	9	1137	127.2	8.72	29.55	9	RNA metabolism OR transcription;other metabolic processes;transport;other biological processes	cytosol;cytoskeleton;nucleus;other cell component	nucleic acid binding activity;other molecular function	Pf10373, Pf10374	9887	ENSG00000116698	SMG7	B4DRB2; E9PCI0; E9PEH2; hsa:9887; Q5T1Q0; Q6PIE0; Q7Z7H9; Q8IXC1; Q8IXC2; Q92540	Nonsense Mediated Decay (NMD) enhanced by the Exon Junction Complex (EJC)		1	0	1.111	1.099	1.035	1.229	0.903	0.901	1.028	1.523	1.536	1.651	1.441	1.262	1.136	1.172	1.111	0.989	0.931	1.106	0.813	0.81	0.925	1.37
High	Master Protein	Q9H0E9	Bromodomain-containing protein 8 OS=Homo sapiens OX=9606 GN=BRD8 PE=1 SV=2	0	FALSE	22.414	8	6	10	6	1235	135.3	4.6	26.75	6	protein metabolism;other metabolic processes;signal transduction;other biological processes	mitochondrion;nucleus	other molecular function	Pf00439	10902	ENSG00000112983	BRD8	hsa:10902; O43178; Q15355; Q58AB0; Q59GN0; Q969M9; Q9H0E9	HATs acetylate histones		1	0
High	Master Protein	Q12959	Disks large homolog 1 OS=Homo sapiens OX=9606 GN=DLG1 PE=1 SV=2	0	FALSE	136.787	47	27	60	1	904	100.4	5.76	161.62	27	cell adhesion;cell-cell signaling;cell cycle OR cell proliferation;cell organization and biogenesis;protein metabolism;other metabolic processes;developmental processes;signal transduction;other biological processes	extracellular matrix;plasma membrane;other membranes;cytosol;cytoskeleton;ER/Golgi;nucleus;other cell component	cytoskeletal activity;kinase activity;other molecular function	Pf00018, Pf00595, Pf00625, Pf09058, Pf10600, Pf10608	1739	ENSG00000075711	DLG1	A5YKK7; B4DGU1; B4DGZ8; B7ZMM0; B9EIQ5; D3DXB8; D3DXB9; E7EWL7; E9PG21; hsa:1739; Q12958; Q12959	Assembly and cell surface presentation of NMDA receptors; RAF/MAP kinase cascade; Ras activation upon Ca2+ influx through NMDA receptor; Unblocking of NMDA receptors, glutamate binding and activation; Synaptic adhesion-like molecules; Negative regulation of NMDA receptor-mediated neuronal transmission; Long-term potentiation; Trafficking of AMPA receptors; NrCAM interactions; Activation of Ca-per…	Brain-derived neurotrophic factor (BDNF) signaling pathway; T-cell antigen receptor (TCR) pathway during Staphylococcus aureus infection; Disruption of postsynaptic signaling by CNV; 3q29 copy number variation syndrome	14	0
Medium	Master Protein	K7ELZ7	Metallophosphoesterase 1 (Fragment) OS=Homo sapiens OX=9606 GN=MPPE1 PE=1 SV=1	0.035	FALSE	1.398	5	1	1	1	161	17.8	6.11	0	1	protein metabolism;other metabolic processes					ENSG00000154889	MPPE1	K7ELZ7			0	0
High	Master Protein	O00217	NADH dehydrogenase [ubiquinone] iron-sulfur protein 8, mitochondrial OS=Homo sapiens OX=9606 GN=NDUFS8 PE=1 SV=1	0	FALSE	31.742	32	6	10	6	210	23.7	6.34	27.45	6	cell organization and biogenesis;other metabolic processes;stress response;transport	other membranes;mitochondrion	transporter activity;other molecular function	Pf12838	4728	ENSG00000110717	NDUFS8	B2RB86; hsa:4728; O00217; Q0VDA8	Complex I biogenesis	Electron transport chain: OXPHOS system in mitochondria; Nonalcoholic fatty liver disease; Oxidative phosphorylation	5	0	1	1.105	0.768	0.872	1.036	1.089	1.192	0.752	0.807	0.654	0.747	0.683	0.683	0.742	0.783	1.106	0.768	0.872	1.036	1.089	1.193	0.752
High	Master Protein	Q9Y5T4	DnaJ homolog subfamily C member 15 OS=Homo sapiens OX=9606 GN=DNAJC15 PE=1 SV=2	0	FALSE	6.424	13	2	2	2	150	16.4	10.08	4.86	2	cell organization and biogenesis;stress response;transport;other biological processes	other membranes;mitochondrion	other molecular function		29103	ENSG00000120675	DNAJC15	B2R4L0; hsa:29103; Q5T219; Q6X963; Q9Y5T4		Glucocorticoid receptor pathway; Nuclear receptors meta-pathway	2	0	0.665	0.907	0.369	1.091	0.587	0.33	0.486	0.18	0.221	0.344	0.394	0.452	0.5	0.41	0.556	1.363	0.555	1.64	0.883	0.496	0.731	0.271
High	Master Protein	Q96AE4	Far upstream element-binding protein 1 OS=Homo sapiens OX=9606 GN=FUBP1 PE=1 SV=3	0	FALSE	99.214	42	22	64	12	644	67.5	7.61	190.06	22	other biological processes	nucleus;other cell component	nucleic acid binding activity	Pf00013, Pf09005	8880	ENSG00000162613	FUBP1	hsa:8880; Q12828; Q96AE4			0	2	1.119	1.01	0.988	0.871	0.691	0.644	0.673	0.785	0.677	0.658	0.733	0.866	0.812	0.668	0.772	0.902	0.883	0.778	0.617	0.575	0.602	0.701
High	Master Protein	F8VSI7	Bax inhibitor 1 (Fragment) OS=Homo sapiens OX=9606 GN=TMBIM6 PE=1 SV=1	0.003	FALSE	2.844	9	1	1	1	138	15.1	9.33	3.1	1	other metabolic processes;stress response;other biological processes	other membranes		Pf01027		ENSG00000139644	TMBIM6	F8VSI7			0	0	0.845	0.868	0.53	1.087	0.991	1.116	1.128	0.435	0.416	0.501	0.323	1.12	1.131	0.919	1.117	1.027	0.627	1.286	1.172	1.32	1.335	0.515
High	Master Protein	P0CG13	Chromosome transmission fidelity protein 8 homolog OS=Homo sapiens OX=9606 GN=CHTF8 PE=1 SV=1	0	FALSE	7.131	19	2	2	2	121	13.3	8.18	3.82	2	cell cycle OR cell proliferation;cell organization and biogenesis;DNA metabolism;other metabolic processes;other biological processes	nucleus;other cell component	nucleic acid binding activity	Pf09696	54921	ENSG00000168802	CHTF8	A8MYX8; hsa:54921; P0CG13; Q71E72; Q8NDH8; Q8WV66; Q9NX73	Polymerase switching on the C-strand of the telomere	Gastric cancer network 2	2	0	1.089	0.84	0.735	0.779	0.549	0.749	0.841	2.469	1.999	1.369	2.161	2.73	1.484	1.737	1.986	0.771	0.675	0.716	0.504	0.688	0.772	2.269
High	Master Protein	P78357	Contactin-associated protein 1 OS=Homo sapiens OX=9606 GN=CNTNAP1 PE=1 SV=1	0	FALSE	6.681	2	2	4	2	1384	156.2	7.05	11.7	2	cell adhesion;cell organization and biogenesis;developmental processes;signal transduction;other biological processes	plasma membrane;other membranes;other cell component	other molecular function	Pf00754, Pf02210	8506	ENSG00000108797	CNTNAP1	hsa:8506; P78357	Neurofascin interactions		1	0	1.101	0.714	1.062	0.75	0.667	0.73	0.603	0.39	0.423	0.412	0.43	0.462	0.358	0.453	0.428	0.648	0.965	0.681	0.606	0.663	0.548	0.354
High	Master Protein	Q14683	Structural maintenance of chromosomes protein 1A OS=Homo sapiens OX=9606 GN=SMC1A PE=1 SV=2	0	FALSE	181.841	38	43	82	43	1233	143.1	7.64	235.45	43	cell cycle OR cell proliferation;cell organization and biogenesis;DNA metabolism;other metabolic processes;stress response;other biological processes	cytosol;cytoskeleton;nucleus;other cell component	nucleic acid binding activity;other molecular function	Pf02463, Pf06470	8243	ENSG00000072501	SMC1A	hsa:8243; O14995; Q14683; Q16351; Q2M228	Estrogen-dependent gene expression; Separation of Sister Chromatids; Resolution of Sister Chromatid Cohesion; Meiotic synapsis; SUMOylation of DNA damage response and repair proteins; Establishment of Sister Chromatid Cohesion; Cohesin Loading onto Chromatin	miRNA regulation of DNA damage response; Cell cycle; Retinoblastoma gene in cancer; Constitutive androstane receptor pathway; Nuclear receptors meta-pathway; Pathways affected in adenoid cystic carcinoma; ATM signaling in development and disease ; mRNA processing; Regulation of sister chromatid separation at the metaphase-anaphase transition; Rett syndrome causing genes; CAMKK2 pathway; Cohesin c…	21	0	1.138	1.089	1.539	0.889	0.784	0.856	0.778	1.714	1.549	1.724	1.725	1.78	1.591	1.413	1.57	0.957	1.352	0.781	0.688	0.752	0.683	1.506
High	Master Protein	E7ENN3	Nesprin-1 OS=Homo sapiens OX=9606 GN=SYNE1 PE=1 SV=2	0	FALSE	9.359	1	5	6	4	8392	964.2	5.54	15.78	5		other membranes;nucleus	cytoskeletal activity	Pf00307, Pf00435, Pf10541		ENSG00000131018	SYNE1	E7ENN3			0	0
High	Master Protein	Q96QE3	ATPase family AAA domain-containing protein 5 OS=Homo sapiens OX=9606 GN=ATAD5 PE=1 SV=4	0	FALSE	9.122	4	5	6	5	1844	207.4	9.19	10.74	5	stress response;other biological processes	nucleus;other cell component	nucleic acid binding activity;other molecular function	Pf00004	79915	ENSG00000176208	ATAD5	hsa:79915; Q05DH0; Q69YR6; Q96QE3; Q9H9I1			0	0
High	Master Protein	F8WCT1	ADP-ribosylation factor-like protein 6-interacting protein 4 OS=Homo sapiens OX=9606 GN=ARL6IP4 PE=1 SV=1	0	FALSE	18.803	21	4	8	1	229	25.6	10.95	23.87	4		nucleus		Pf10500		ENSG00000182196	ARL6IP4	F8WCT1			0	0
High	Master Protein	Q9NQC8	Intraflagellar transport protein 46 homolog OS=Homo sapiens OX=9606 GN=IFT46 PE=1 SV=1	0	FALSE	8.097	7	1	1	1	304	34.3	4.54	4.66	1	cell organization and biogenesis;transport;other biological processes	cytoskeleton;other cell component	other molecular function	Pf12317	56912	ENSG00000118096	IFT46	A8K0F6; hsa:56912; Q9H6V5; Q9NQC8	Intraflagellar transport	Ciliary landscape; Intraflagellar transport proteins binding to dynein; Genes related to primary cilium development (based on CRISPR)	4	0
High	Master Protein	Q6PCE3	Glucose 1,6-bisphosphate synthase OS=Homo sapiens OX=9606 GN=PGM2L1 PE=1 SV=3	0	FALSE	9.473	6	4	6	3	622	70.4	7.15	9.7	4	other metabolic processes	cytosol	kinase activity;other molecular function	Pf00408, Pf02878, Pf02879, Pf02880	283209	ENSG00000165434	PGM2L1	hsa:283209; Q6PCE3; Q96MQ7; Q9UIK3	Glycogen breakdown (glycogenolysis); Glycolysis; Glycogen synthesis; Galactose catabolism		4	0	1.111	0.978	1.418	0.76	1.53	1.503	1.295	4.205	4.074	3.884	4.531	2.51	1.982	1.81	1.735	0.88	1.276	0.684	1.377	1.352	1.165	3.784
High	Master Protein	Q7Z7N9	Transmembrane protein 179B OS=Homo sapiens OX=9606 GN=TMEM179B PE=1 SV=1	0.004	FALSE	2.691	4	1	1	1	219	23.5	7.85	2.24	1	transport	plasma membrane;other membranes;nucleus;other cytoplasmic organelle			374395	ENSG00000185475	TMEM179B	hsa:374395; Q7Z7N9	Neutrophil degranulation		1	0
High	Master Protein	X6RLT1	Negative elongation factor C/D (Fragment) OS=Homo sapiens OX=9606 GN=NELFCD PE=1 SV=1	0	FALSE	33.968	23	9	16	9	593	66.5	5.07	41.87	9	other biological processes	nucleus		Pf04858		ENSG00000101158	NELFCD	X6RLT1		Initiation of transcription and translation elongation at the HIV-1 LTR	1	0	1.3	1.309	1.132	1.212	1.186	0.993	1.136	2.001	1.95	1.986	1.898	2.096	1.518	1.781	1.667	1.007	0.871	0.932	0.912	0.764	0.874	1.539
High	Master Protein	Q9BVP2	Guanine nucleotide-binding protein-like 3 OS=Homo sapiens OX=9606 GN=GNL3 PE=1 SV=2	0	FALSE	50.987	28	12	18	11	549	62	9.16	56.38	12	cell cycle OR cell proliferation;other biological processes	nucleus;other cell component	nucleic acid binding activity;other molecular function	Pf01926, Pf08701	26354	ENSG00000163938	GNL3	B2RDC1; hsa:26354; Q5PU80; Q96SV6; Q96SV7; Q9BVP2; Q9UJY0	Major pathway of rRNA processing in the nucleolus and cytosol		1	1	1.127	1.109	0.894	0.601	0.559	0.528	0.628	0.899	0.802	0.751	0.906	1.133	1.082	0.942	1.145	0.984	0.794	0.533	0.496	0.469	0.557	0.797
Medium	Master Protein	H3BUD2	Dynactin subunit 5 OS=Homo sapiens OX=9606 GN=DCTN5 PE=1 SV=1	0.011	FALSE	2.087	21	1	1	1	53	6	7.75	1.62	1						ENSG00000166847	DCTN5	H3BUD2			0	0
Medium	Master Protein	E5RGN6	Interactor protein for cytohesin exchange factors 1 (Fragment) OS=Homo sapiens OX=9606 GN=IPCEF1 PE=4 SV=1	0.021	FALSE	1.741	13	1	1	1	108	12.7	9.66	2.15	1				Pf00169		ENSG00000074706	IPCEF1	E5RGN6			0	0
High	Master Protein	M9T4I7	MEX3C variant 2 OS=Homo sapiens OX=9606 GN=MEX3C PE=1 SV=1	0	FALSE	6.314	8	3	3	2	489	52.1	7.23	7.71	3			nucleic acid binding activity	Pf00013, Pf13920							0	0	1.056	1.124	1.229	0.943	0.882	1.052	0.896	0.795	0.981	1.008	1.012	1.255	1.168	0.941	1.307	1.064	1.164	0.893	0.835	0.996	0.848	0.752
High	Master Protein	A0A5H1ZRP8	Dystrophin OS=Homo sapiens OX=9606 GN=DMD PE=1 SV=1	0	FALSE	6.719	1	3	3	2	3681	425.8	5.92	5.71	3		plasma membrane;other membranes;cytoskeleton;other cell component	cytoskeletal activity;other molecular function	Pf00307, Pf00397, Pf00435, Pf00569, Pf09068, Pf09069		ENSG00000198947	DMD	A0A5H1ZRP8		Ectoderm differentiation; Acute viral myocarditis	2	0
High	Master Protein	Q9HAV0	Guanine nucleotide-binding protein subunit beta-4 OS=Homo sapiens OX=9606 GN=GNB4 PE=1 SV=3	0	FALSE	41.574	24	8	37	3	340	37.5	6	87.19	8	signal transduction;other biological processes	plasma membrane;other membranes;cytosol;other cell component	other molecular function	Pf00400	59345	ENSG00000114450	GNB4	B3KMH5; D3DNR8; hsa:59345; Q9HAV0	G alpha (i) signalling events; G alpha (z) signalling events; ADP signalling through P2Y purinoceptor 12; G alpha (s) signalling events; Extra-nuclear estrogen signaling; ADORA2B mediated anti-inflammatory cytokines production; Vasopressin regulates renal water homeostasis via Aquaporins; Glucagon signaling in metabolic regulation; Glucagon-like Peptide-1 (GLP1) regulates insulin secretion; G alp…	Myometrial relaxation and contraction pathways; Chemokine signaling pathway; Focal adhesion: PI3K-Akt-mTOR-signaling pathway; PI3K-Akt signaling pathway; Ras signaling; Calcium regulation in cardiac cells	33	0	0.844	0.953	1.11	1.072	1.093	1.212	1.055	0.896	0.837	0.83	0.773	0.81	0.976	0.91	0.887	1.129	1.315	1.27	1.295	1.436	1.25	1.062
Medium	Master Protein	Q5SZK8	FRAS1-related extracellular matrix protein 2 OS=Homo sapiens OX=9606 GN=FREM2 PE=1 SV=2	0.034	FALSE	1.412	0	1	1	1	3169	350.9	5.03	1.66	1	cell adhesion;developmental processes;other biological processes	extracellular matrix;plasma membrane;other membranes	other molecular function	Pf03160, Pf16184, Pf19309	341640	ENSG00000150893	FREM2	hsa:341640; Q4QQG1; Q5H9N8; Q5SZK8; Q5T6Q1; Q6N057; Q6ZSB4; Q7Z305; Q7Z341		Development of ureteric collection system	1	0	0.771	0.813	0.682	1.534	1.328	1.244	1.445	0.652	1.005	0.459	0.934	0.735	1.109	1.044	1.161	1.054	0.884	1.988	1.721	1.612	1.873	0.845
High	Master Protein	Q86YP4	Transcriptional repressor p66-alpha OS=Homo sapiens OX=9606 GN=GATAD2A PE=1 SV=1	0	FALSE	24.925	10	6	10	5	633	68	9.94	26.19	6	DNA metabolism;other metabolic processes;other biological processes	nucleus	nucleic acid binding activity;other molecular function	Pf00320, Pf16563	54815	ENSG00000167491	GATAD2A	B5MC40; hsa:54815; Q7L3J2; Q86YP4; Q96F28; Q9NPU2; Q9NXS1	Potential therapeutics for SARS; Regulation of PTEN gene transcription; RNA Polymerase I Transcription Initiation; ERCC6 (CSB) and EHMT2 (G9a) positively regulate rRNA expression; HDACs deacetylate histones; Regulation of TP53 Activity through Acetylation		6	0	1.073	1.037	1.103	0.623	0.513	0.511	0.532	0.948	0.832	0.864	0.954	1.116	1.03	0.829	1.079	0.966	1.028	0.58	0.478	0.476	0.496	0.884
High	Master Protein	F8VXJ2	Homeobox protein DLX-1 (Fragment) OS=Homo sapiens OX=9606 GN=DLX1 PE=1 SV=1	0.001	FALSE	4.046	5	1	2	1	187	20.5	9.77	2.99	1	other biological processes	nucleus	nucleic acid binding activity;other molecular function	Pf00046		ENSG00000144355	DLX1	F8VXJ2			0	0
High	Master Protein	Q9H4K7	Mitochondrial ribosome-associated GTPase 2 OS=Homo sapiens OX=9606 GN=MTG2 PE=1 SV=1	0	FALSE	28.503	19	6	9	6	406	43.9	9.45	26.01	6	other biological processes	other membranes;mitochondrion;translational apparatus	other molecular function	Pf01018, Pf01926	26164	ENSG00000101181	MTG2	A6NDR3; B4DR85; hsa:26164; Q96I17; Q9H4K7; Q9NVG9; Q9UFR4			0	0	0.826	0.924	0.695	1.872	1.111	1.26	1.329	0.867	1.014	0.956	0.942	0.879	1.035	0.856	1.002	1.12	0.842	2.267	1.345	1.526	1.61	1.05
High	Master Protein	G3XA83	Beta-1,4-galactosyltransferase 6 OS=Homo sapiens OX=9606 GN=B4GALT6 PE=1 SV=1	0	FALSE	4.737	6	2	2	2	343	40.4	7.58	2.65	2	protein metabolism;other metabolic processes	other membranes;ER/Golgi	other molecular function	Pf02709, Pf13733	9331	ENSG00000118276	B4GALT6	G3XA83		Sphingolipid pathway	1	0	0.995	0.998	0.96	1.492	1.463	1.372	1.481	0.584	0.575	0.608	0.689	1.118	1.176	1.342	1.193	1.003	0.965	1.499	1.471	1.379	1.489	0.587
High	Master Protein	Q9BRX8	Peroxiredoxin-like 2A OS=Homo sapiens OX=9606 GN=PRXL2A PE=1 SV=3	0	FALSE	18.077	18	4	15	4	229	25.7	8.84	38.57	4	other biological processes	non-structural extracellular;other cell component	other molecular function	Pf13911	84293	ENSG00000122378	PRXL2A	B2RD81; hsa:84293; Q6UW08; Q8N2K3; Q8NBK9; Q96JR0; Q9BRX8			0	0	1.021	1.019	1.634	0.943	1.244	1.178	1.184	0.742	0.776	0.752	0.767	0.961	0.984	1.063	1.094	0.998	1.6	0.923	1.217	1.153	1.159	0.727
High	Master Protein	C9J586	Rho guanine nucleotide exchange factor 3 OS=Homo sapiens OX=9606 GN=ARHGEF3 PE=1 SV=1	0	FALSE	5.137	3	1	3	1	416	47.6	7.66	9.08	1	signal transduction		enzyme regulator activity	Pf00621		ENSG00000163947	ARHGEF3	C9J586			0	0
High	Master Protein	H3BRM1	Abscission/NoCut checkpoint regulator (Fragment) OS=Homo sapiens OX=9606 GN=ZFYVE19 PE=1 SV=1	0	FALSE	5.022	11	3	6	2	307	33.2	7.88	13.51	3			other molecular function	Pf01363		ENSG00000166140	ZFYVE19	H3BRM1			0	0
High	Master Protein	Q9Y606	tRNA pseudouridine synthase A OS=Homo sapiens OX=9606 GN=PUS1 PE=1 SV=3	0	FALSE	71.458	44	17	35	17	427	47.4	8.41	96.27	17	RNA metabolism OR transcription;other metabolic processes	mitochondrion;nucleus	nucleic acid binding activity;other molecular function	Pf01416	80324	ENSG00000177192	PUS1	A8K877; B3KQC1; hsa:80324; Q8WYT2; Q9BU44; Q9Y606			0	0	0.769	0.876	0.706	1.21	1.103	1.145	1.242	0.733	0.971	0.801	0.836	0.772	1.011	0.884	1.082	1.139	0.918	1.574	1.435	1.489	1.616	0.954
High	Master Protein	A0A0D9SFH9	Battenin OS=Homo sapiens OX=9606 GN=CLN3 PE=1 SV=1	0	FALSE	7.531	16	3	3	3	341	36.3	6.04	8.85	3		other membranes;other cytoplasmic organelle		Pf02487							0	0	0.978	1.191	1.055	0.753	1.129	1.063	1.303	0.602	0.657	0.819	0.625	1.258	1.124	1.274	1.046	1.218	1.079	0.77	1.154	1.087	1.333	0.615
High	Master Protein	A0A0A0MR51	Acyl-CoA (8-3)-desaturase OS=Homo sapiens OX=9606 GN=FADS1 PE=1 SV=1	0	FALSE	34.406	16	6	14	6	501	57.8	9.48	41.26	6	other metabolic processes;stress response;other biological processes	other membranes;ER/Golgi;nucleus	other molecular function	Pf00173, Pf00487	3992	ENSG00000149485	FADS1	A0A0A0MR51; hsa:3992		Cholesterol metabolism with Bloch and Kandutsch-Russell pathways; Omega-3 / omega-6 fatty acid synthesis; Omega-9 fatty acid synthesis; Linoleic acid metabolism affected by coronavirus infection	4	0	1.051	0.859	1.094	0.788	0.745	0.746	0.738	0.421	0.407	0.381	0.416	0.546	0.621	0.588	0.608	0.817	1.041	0.75	0.708	0.71	0.702	0.401
High	Master Protein	P40763	Signal transducer and activator of transcription 3 OS=Homo sapiens OX=9606 GN=STAT3 PE=1 SV=2	0	FALSE	81.537	34	15	20	15	770	88	6.3	65.64	15	other metabolic processes;stress response;transport;developmental processes;signal transduction;other biological processes	plasma membrane;other membranes;cytosol;nucleus;other cell component	nucleic acid binding activity;other molecular function	Pf00017, Pf01017, Pf02864, Pf02865	6774	ENSG00000168610	STAT3	A8K7B8; hsa:6774; K7ENL3; O14916; P40763; Q9BW54	Senescence-Associated Secretory Phenotype (SASP); Signaling by SCF-KIT; Interleukin-4 and Interleukin-13 signaling; Signaling by ALK fusions and activated point mutants; Interleukin-7 signaling; Downstream signal transduction; Signaling by ALK; Signaling by phosphorylated juxtamembrane, extracellular and kinase domain KIT mutants; Signaling by PDGFRA transmembrane, juxtamembrane and kinase domain…	IL-5 signaling pathway; Androgen receptor signaling pathway; Physiological and pathological hypertrophy of the heart; MicroRNAs in cardiomyocyte hypertrophy; Transcription factors regulate miRNAs related to cardiac hypertrophy; Cell differentiation - expanded index; Cell differentiation - index; Thyroid stimulating hormone (TSH) signaling pathway; Leptin signaling pathway; Prolactin signaling pat…	101	0	1.171	1.172	1.184	1	0.979	0.973	1.001	2.531	2.182	2.358	2.393	1.811	1.503	1.681	1.44	1.001	1.011	0.854	0.836	0.831	0.855	2.161
High	Master Protein	Q9Y3C5	RING finger protein 11 OS=Homo sapiens OX=9606 GN=RNF11 PE=1 SV=1	0	FALSE	5.86	14	2	5	2	154	17.4	4.78	9.12	2	protein metabolism;other metabolic processes	nucleus;other cytoplasmic organelle;other cell component	nucleic acid binding activity;other molecular function	Pf13639	26994	ENSG00000123091	RNF11	A8KAI2; hsa:26994; Q5T7R8; Q9Y3C5			0	0	0.895	0.905	1.119	0.713	0.695	0.775	0.678	0.503	0.525	0.485	0.533	0.61	0.601	0.622	0.828	1.011	1.251	0.797	0.777	0.865	0.757	0.562
High	Master Protein	A0A087WY61	Nuclear mitotic apparatus protein 1 OS=Homo sapiens OX=9606 GN=NUMA1 PE=1 SV=1	0	FALSE	305.084	35	62	132	34	2099	236	5.92	393.7	62		other membranes;cytosol;ER/Golgi;nucleus				ENSG00000137497	NUMA1	A0A087WY61		Ectoderm differentiation; Ectoderm differentiation	2	19	1.055	1.086	1.334	0.87	0.857	0.825	0.926	1.199	1.174	1.163	1.237	1.86	1.603	1.324	1.649	1.029	1.265	0.824	0.812	0.782	0.877	1.137
High	Master Protein	P17152	Transmembrane protein 11, mitochondrial OS=Homo sapiens OX=9606 GN=TMEM11 PE=1 SV=1	0	FALSE	16.712	19	4	11	4	192	21.5	7.36	23.99	4	cell organization and biogenesis	plasma membrane;other membranes;mitochondrion		Pf14972	8834	ENSG00000178307	TMEM11	hsa:8834; P17152; Q53YB2	Cristae formation		1	0	1.017	1.128	0.905	1.047	1.141	1.092	1.226	1.011	1.093	0.955	1.084	1.297	1.177	1.321	1.398	1.109	0.89	1.03	1.122	1.074	1.206	0.994
High	Master Protein	E9PDP5	Ankyrin repeat and KH domain-containing protein 1 (Fragment) OS=Homo sapiens OX=9606 GN=ANKHD1 PE=1 SV=1	0	FALSE	46.002	10	11	15	1	1565	166.6	5.01	44.01	11				Pf12796		ENSG00000131503	ANKHD1	E9PDP5			0	0
High	Master Protein	Q9Y394	Dehydrogenase/reductase SDR family member 7 OS=Homo sapiens OX=9606 GN=DHRS7 PE=1 SV=1	0	FALSE	43.653	31	8	20	8	339	38.3	8.32	43.89	8			other molecular function	Pf00106	51635	ENSG00000100612	DHRS7	B2R896; hsa:51635; Q9UKU2; Q9Y394			0	0	0.909	0.841	1.158	1.264	1.526	1.476	1.385	0.793	0.849	0.866	0.935	1.238	1.176	1.323	1.483	0.926	1.274	1.391	1.679	1.624	1.524	0.873
High	Master Protein	E9PN10	Receptor-binding cancer antigen-expressed on SiSo cells (Fragment) OS=Homo sapiens OX=9606 GN=EBAG9 PE=1 SV=1	0	FALSE	11.844	22	2	5	2	197	22.5	5.24	17.22	2						ENSG00000147654	EBAG9	E9PN10			0	0
High	Master Protein	K4DIA7	Tetraspanin (Fragment) OS=Homo sapiens OX=9606 GN=CD151 PE=1 SV=1	0	FALSE	23.559	25	7	28	7	230	25.6	7.24	64.25	7		other membranes		Pf00335		ENSG00000177697	CD151	K4DIA7		Primary focal segmental glomerulosclerosis (FSGS)	1	0	1.093	0.967	0.886	1.141	1.009	0.997	1.031	0.849	0.934	0.673	0.813	0.896	0.955	1.002	0.878	0.885	0.811	1.044	0.923	0.912	0.943	0.777
High	Master Protein	Q15424	Scaffold attachment factor B1 OS=Homo sapiens OX=9606 GN=SAFB PE=1 SV=4	0	FALSE	87.801	25	17	40	9	915	102.6	5.47	116	17	cell organization and biogenesis;signal transduction;other biological processes	nucleus;other cell component	nucleic acid binding activity;other molecular function	Pf00076, Pf02037	6294	ENSG00000160633	SAFB	A0AV56; B7Z5B6; B7ZLP6; F5H0H3; hsa:6294; O60406; Q15424; Q59HH8	SUMOylation of transcription cofactors	Interleukin-1 (IL-1) structural pathway	2	0	1.193	0.995	1.516	1.121	0.811	0.794	0.663	1.456	1.137	1.287	1.425	1.541	1.487	0.889	1.447	0.834	1.271	0.94	0.68	0.666	0.556	1.22
High	Master Protein	C9J1X3	Activated CDC42 kinase 1 OS=Homo sapiens OX=9606 GN=TNK2 PE=1 SV=1	0	FALSE	7.353	1	1	4	1	1040	114.9	7.99	10.85	1	protein metabolism;other metabolic processes;signal transduction	plasma membrane;other membranes;nucleus;other cell component	kinase activity;other molecular function	Pf07714, Pf09027, Pf11555, Pf14604	10188	ENSG00000061938	TNK2	C9J1X3		Focal adhesion; Oxidative damage response; EGF/EGFR signaling pathway; G13 signaling pathway	4	0
High	Master Protein	P27816	Microtubule-associated protein 4 OS=Homo sapiens OX=9606 GN=MAP4 PE=1 SV=3	0	FALSE	209.185	52	43	113	32	1152	120.9	5.43	274.68	43	cell cycle OR cell proliferation;cell organization and biogenesis;developmental processes;other biological processes	plasma membrane;other membranes;cytosol;cytoskeleton;other cell component	cytoskeletal activity;other molecular function	Pf00418	4134	ENSG00000047849	MAP4	hsa:4134; P27816; Q13082; Q59FT2; Q68D74; Q6ZUW9; Q86V26; Q96A76; Q96NS9		Splicing factor NOVA regulated synaptic proteins	1	8	1.048	1.064	1.095	1.181	1.17	1.205	1.224	1.975	1.85	1.982	1.988	1.73	1.558	1.521	1.494	1.015	1.046	1.127	1.116	1.15	1.168	1.885
Medium	Master Protein	P22415	Upstream stimulatory factor 1 OS=Homo sapiens OX=9606 GN=USF1 PE=1 SV=1	0.022	FALSE	1.673	2	1	1	1	310	33.5	5.54	1.93	1	other metabolic processes;stress response;other biological processes	nucleus;other cell component	nucleic acid binding activity;other molecular function	Pf00010	7391	ENSG00000158773	USF1	B2RBZ4; hsa:7391; P22415; Q5SY46; Q7Z5Y1	Estrogen-dependent gene expression	7q11.23 copy number variation syndrome; Familial hyperlipidemia type 2	3	0
High	Master Protein	Q14331	Protein FRG1 OS=Homo sapiens OX=9606 GN=FRG1 PE=1 SV=1	0	FALSE	20.776	26	6	9	6	258	29.2	9.01	22.18	6	RNA metabolism OR transcription;other metabolic processes;developmental processes	cytoskeleton;nucleus	cytoskeletal activity	Pf06229	2483	ENSG00000109536; ENSG00000275145; ENSG00000283153; ENSG00000283630	FRG1	A8K775; hsa:2483; Q14331			0	0	1.137	1.108	1.048	1.024	0.905	0.865	1.044	0.862	0.875	0.695	0.801	1.063	0.993	0.933	1.076	0.975	0.922	0.9	0.796	0.761	0.918	0.758
High	Master Protein	Q8WZ82	Esterase OVCA2 OS=Homo sapiens OX=9606 GN=OVCA2 PE=1 SV=1	0	FALSE	9.439	14	3	6	3	227	24.4	6.89	15.55	3	other biological processes	nucleus;other cell component	other molecular function	Pf03959	124641	ENSG00000262664	OVCA2	hsa:124641; Q86XN3; Q8IW87; Q8WZ82; Q9UCX9			0	0	0.836	0.929	0.859	1.191	1.273	1.248	1.216	1.046	1.163	1.26	1.161	0.909	0.867	0.826	0.831	1.111	1.028	1.425	1.522	1.493	1.454	1.251
High	Master Protein	P13984	General transcription factor IIF subunit 2 OS=Homo sapiens OX=9606 GN=GTF2F2 PE=1 SV=2	0	FALSE	41.175	49	11	20	11	249	28.4	9.23	50.84	11	cell organization and biogenesis;RNA metabolism OR transcription;other metabolic processes;signal transduction;other biological processes	cytoskeleton;nucleus;other cell component	nucleic acid binding activity;other molecular function	Pf02270, Pf17683	2963	ENSG00000188342	GTF2F2	A6NNS5; hsa:2963; P13984; Q5W0H3	Formation of RNA Pol II elongation complex ; Formation of HIV elongation complex in the absence of HIV Tat; Formation of HIV-1 elongation complex containing HIV-1 Tat; Pausing and recovery of Tat-mediated HIV elongation; Tat-mediated HIV elongation arrest and recovery; HIV elongation arrest and recovery; Pausing and recovery of HIV elongation; RNA Polymerase II Pre-transcription Events; TP53 Regu…	Eukaryotic transcription initiation	33	0	1.039	1.117	1.336	0.945	0.84	0.835	0.787	1.03	1.13	0.946	1.014	0.977	0.909	0.766	0.964	1.076	1.286	0.909	0.809	0.804	0.757	0.992
High	Master Protein	P11216	Glycogen phosphorylase, brain form OS=Homo sapiens OX=9606 GN=PYGB PE=1 SV=5	0	FALSE	66.001	21	16	33	10	843	96.6	6.86	87.27	16	other metabolic processes;transport	non-structural extracellular;other cytoplasmic organelle;other cell component	other molecular function	Pf00343	5834	ENSG00000100994	PYGB	hsa:5834; P11216; Q96AK1; Q9NPX8	Neutrophil degranulation; Glycogen breakdown (glycogenolysis)	IL-18 signaling pathway; Glycogen synthesis and degradation	4	0	0.962	0.991	1.32	0.924	1.815	1.741	1.703	1.789	1.918	1.719	1.873	1.529	1.702	1.672	1.503	1.03	1.372	0.96	1.887	1.81	1.771	1.861
High	Master Protein	Q96T76	MMS19 nucleotide excision repair protein homolog OS=Homo sapiens OX=9606 GN=MMS19 PE=1 SV=2	0	FALSE	74.32	28	21	33	21	1030	113.2	6.35	75.43	21	cell organization and biogenesis;protein metabolism;DNA metabolism;RNA metabolism OR transcription;other metabolic processes;stress response;signal transduction;other biological processes	cytosol;cytoskeleton;nucleus;other cell component	other molecular function	Pf12460, Pf14500	64210	ENSG00000155229	MMS19	B0QZ75; B3KPE5; B4DQX2; B4E2I3; D3DR55; F8W9Y2; hsa:64210; Q17RZ8; Q5T455; Q66K82; Q7L4W8; Q969Z1; Q96DF1; Q96MR1; Q96RK5; Q96SK1; Q96T76; Q9BUE2; Q9BYS9	Cytosolic iron-sulfur cluster assembly		1	0	1.257	1.215	0.997	0.788	1.068	1.099	1.193	2.631	2.079	2.31	2.311	1.498	0.987	1.355	1.091	0.966	0.793	0.627	0.849	0.874	0.949	2.093
High	Master Protein	P47895	Aldehyde dehydrogenase family 1 member A3 OS=Homo sapiens OX=9606 GN=ALDH1A3 PE=1 SV=2	0	FALSE	12.803	8	4	7	3	512	56.1	7.25	18.13	4	cell organization and biogenesis;other metabolic processes;developmental processes;other biological processes	cytosol;other cell component	other molecular function	Pf00171	220	ENSG00000184254	ALDH1A3	hsa:220; P47895; Q6NT64	RA biosynthesis pathway	Ethanol effects on histone modifications; Vitamin A and carotenoid metabolism	3	0	1.059	1.088	1.192	0.28	0.362	0.363	0.44	0.558	0.65	0.554	0.525	0.404	0.341	0.411	0.283	1.027	1.125	0.265	0.342	0.343	0.415	0.527
High	Master Protein	C9IYS5	Phytanoyl-CoA dioxygenase, peroxisomal (Fragment) OS=Homo sapiens OX=9606 GN=PHYH PE=1 SV=1	0.002	FALSE	2.987	5	1	2	1	176	20.3	8.43	5	1				Pf05721		ENSG00000107537	PHYH	C9IYS5			0	0
High	Master Protein	E9PCC0	Serine/threonine-protein kinase 32B OS=Homo sapiens OX=9606 GN=STK32B PE=1 SV=1	0.002	FALSE	3.089	4	1	1	1	337	39.4	7.14	2.31	1	protein metabolism;other metabolic processes		kinase activity;other molecular function	Pf00069		ENSG00000152953	STK32B	E9PCC0			0	0
High	Master Protein	Q02952	A-kinase anchor protein 12 OS=Homo sapiens OX=9606 GN=AKAP12 PE=1 SV=4	0	FALSE	537.894	69	85	296	85	1782	191.4	4.41	935.72	85	signal transduction;other biological processes	plasma membrane;other membranes;cytosol;cytoskeleton;other cell component	other molecular function	Pf03832, Pf10522	9590	ENSG00000131016	AKAP12	hsa:9590; O00310; O00498; Q02952; Q4LE68; Q5SZ80; Q5TGN1; Q68D82; Q99970	RHOD GTPase cycle; RHOF GTPase cycle	G protein signaling pathways	3	0	0.965	0.96	1.123	0.964	1.33	1.466	1.255	1.899	2.078	2.062	1.855	1.319	1.451	1.5	1.386	0.995	1.163	0.999	1.378	1.519	1.301	1.968
High	Master Protein	A0A494C0Z1	Protein TALPID3 OS=Homo sapiens OX=9606 GN=KIAA0586 PE=1 SV=1	0	FALSE	9.07	5	3	4	3	570	64.2	8.16	10.3	3	signal transduction			Pf15324		ENSG00000100578	KIAA0586	A0A494C0Z1		Joubert syndrome; Ciliopathies	2	0
High	Master Protein	P30050	60S ribosomal protein L12 OS=Homo sapiens OX=9606 GN=RPL12 PE=1 SV=1	0	FALSE	48.413	64	9	41	9	165	17.8	9.42	130.72	9	protein metabolism;RNA metabolism OR transcription;other metabolic processes;transport;other biological processes	cytosol;translational apparatus;other cell component	nucleic acid binding activity;other molecular function	Pf00298, Pf03946	6136	ENSG00000197958	RPL12	hsa:6136; P30050; Q5VVV2; Q6PB27	Regulation of expression of SLITs and ROBOs; L13a-mediated translational silencing of Ceruloplasmin expression; Formation of a pool of free 40S subunits; GTP hydrolysis and joining of the 60S ribosomal subunit; Major pathway of rRNA processing in the nucleolus and cytosol; Nonsense Mediated Decay (NMD) enhanced by the Exon Junction Complex (EJC); SRP-dependent cotranslational protein targeting to…	Cytoplasmic ribosomal proteins	14	0	1.066	1.027	0.824	1.094	0.898	0.863	0.957	0.693	0.715	0.653	0.701	0.888	0.725	0.862	0.807	0.964	0.773	1.027	0.843	0.809	0.898	0.65
High	Master Protein	Q86YQ8	Copine-8 OS=Homo sapiens OX=9606 GN=CPNE8 PE=1 SV=2	0	FALSE	49.35	27	12	24	11	564	63.1	5.96	67.92	12	other biological processes	plasma membrane;other membranes	other molecular function	Pf00168, Pf07002	144402	ENSG00000139117	CPNE8	hsa:144402; Q2TB41; Q86VY2; Q86YQ8	RHOQ GTPase cycle; RHOJ GTPase cycle; RHOD GTPase cycle; CDC42 GTPase cycle		4	0	0.946	0.926	0.902	1.189	1.315	1.246	1.176	0.662	0.661	0.685	0.667	0.923	1.162	0.982	1.025	0.979	0.953	1.257	1.39	1.317	1.243	0.7
High	Master Protein	Q9H3L0	Methylmalonic aciduria and homocystinuria type D protein, mitochondrial OS=Homo sapiens OX=9606 GN=MMADHC PE=1 SV=2	0.009	FALSE	2.132	3	1	1	1	296	32.9	5.29	0	1	other metabolic processes	cytosol;mitochondrion;other cell component		Pf10229	27249	ENSG00000168288	MMADHC	B2R895; D3DP91; hsa:27249; O95891; Q9H3L0	Cobalamin (Cbl, vitamin B12) transport and metabolism; Defective MMADHC causes MMAHCD		2	0	0.715	0.761	1.299	1.039	1.017	0.99	1.023	0.565	0.776	0.446	0.621	0.492	0.634	0.525	0.681	1.064	1.817	1.452	1.422	1.383	1.43	0.79
High	Master Protein	B1AMF1	Ubiquitin-conjugating enzyme E2 J2 (Fragment) OS=Homo sapiens OX=9606 GN=UBE2J2 PE=1 SV=1	0	FALSE	9.194	22	2	6	2	101	11.9	9.57	15.51	2				Pf00179		ENSG00000160087	UBE2J2	B1AMF1			0	0
High	Master Protein	Q9UBU9	Nuclear RNA export factor 1 OS=Homo sapiens OX=9606 GN=NXF1 PE=1 SV=1	0	FALSE	47.309	23	11	26	11	619	70.1	8.51	75.5	11	other metabolic processes;transport;other biological processes	cytosol;nucleus;other cell component	nucleic acid binding activity	Pf02136, Pf03943, Pf09162	10482	ENSG00000162231	NXF1	B4E269; hsa:10482; Q99799; Q9UBU9; Q9UQL2	Transport of Mature mRNA derived from an Intron-Containing Transcript; Transport of the SLBP independent Mature mRNA; Transport of the SLBP Dependant Mature mRNA; Transport of Mature mRNA Derived from an Intronless Transcript	mRNA processing	5	0	1.011	1.005	1.355	0.908	0.873	0.848	0.934	1.054	1.001	1.04	1.153	1.237	1.236	1.152	1.244	0.994	1.34	0.898	0.864	0.839	0.924	1.043
High	Master Protein	Q14192	Four and a half LIM domains protein 2 OS=Homo sapiens OX=9606 GN=FHL2 PE=1 SV=3	0	FALSE	11.569	15	4	5	4	279	32.2	7.55	10.19	4	developmental processes;other biological processes	cytoskeleton;nucleus	other molecular function	Pf00412	2274	ENSG00000115641	FHL2	hsa:2274; Q13229; Q13644; Q14192; Q2I5I4; Q5TM15; Q9P294	PPARA activates gene expression	Androgen receptor signaling pathway; RANKL/RANK signaling pathway; Ectoderm differentiation; VEGFA-VEGFR2 signaling pathway	5	0	1.162	1.057	0.883	1.166	1.071	1.061	1.24	1.623	1.707	1.377	1.661	1.673	1.53	1.698	1.093	0.91	0.76	1.004	0.922	0.913	1.067	1.397
High	Master Protein	Q92845	Kinesin-associated protein 3 OS=Homo sapiens OX=9606 GN=KIFAP3 PE=1 SV=2	0	FALSE	11.176	4	2	2	2	792	91.1	5.08	6.95	2	cell organization and biogenesis;transport;signal transduction;other biological processes	plasma membrane;other membranes;cytosol;cytoskeleton;ER/Golgi;nucleus;other cell component	cytoskeletal activity;other molecular function	Pf05804	22920	ENSG00000075945	KIFAP3	B1AKU4; B1AKU5; B2RDL1; B7Z8A3; F5H591; hsa:22920; Q8NHU7; Q92845; Q9H416	Translocation of SLC2A4 (GLUT4) to the plasma membrane; Intraflagellar transport; COPI-dependent Golgi-to-ER retrograde traffic; MHC class II antigen presentation; Kinesins	Genes related to primary cilium development (based on CRISPR)	6	0
Medium	Master Protein	A0A0A6YYC0	Ribosomal protein S6 kinase alpha-4 (Fragment) OS=Homo sapiens OX=9606 GN=RPS6KA4 PE=1 SV=5	0.041	FALSE	1.319	1	1	1	1	704	78.3	7.62	0	1	protein metabolism;other metabolic processes;signal transduction	cytosol;nucleus	kinase activity;other molecular function	Pf00069, Pf00433		ENSG00000162302	RPS6KA4	A0A0A6YYC0		MAPK signaling pathway; Translation inhibitors in chronically activated PDGFRA cells	2	0
High	Master Protein	C9IY40	39S ribosomal protein L2, mitochondrial OS=Homo sapiens OX=9606 GN=MRPL2 PE=1 SV=1	0	FALSE	32.393	40	7	21	7	225	24.4	11	67.07	7	protein metabolism;other metabolic processes	mitochondrion;translational apparatus;nucleus	other molecular function	Pf00181	51069	ENSG00000112651	MRPL2	C9IY40			0	0	0.793	1.042	0.708	1.351	1.375	1.397	1.399	0.824	0.943	0.824	0.786	0.799	0.918	0.904	0.995	1.314	0.893	1.704	1.734	1.762	1.764	1.039
High	Master Protein	Q9P035	Very-long-chain (3R)-3-hydroxyacyl-CoA dehydratase 3 OS=Homo sapiens OX=9606 GN=HACD3 PE=1 SV=2	0	FALSE	51.562	29	8	18	8	362	43.1	8.94	55.64	8	other metabolic processes;signal transduction;other biological processes	other membranes;ER/Golgi;nucleus	enzyme regulator activity;other molecular function	Pf04387	51495	ENSG00000074696	HACD3	A0PJA1; B4DRF4; hsa:51495; Q280Z3; Q6PD63; Q8IUI5; Q8NC86; Q8NCB1; Q96T12; Q9NQA7; Q9P035	Synthesis of very long-chain fatty acyl-CoAs		1	0	1.022	0.949	1.072	0.858	0.924	0.89	0.848	0.513	0.509	0.484	0.484	0.733	0.68	0.772	0.792	0.929	1.049	0.84	0.904	0.871	0.83	0.502
High	Master Protein	A4FU01	Myotubularin-related protein 11 OS=Homo sapiens OX=9606 GN=MTMR11 PE=2 SV=2	0.002	FALSE	3.351	2	1	1	1	709	79.5	7.03	2.1	1	other metabolic processes	other cell component	other molecular function	Pf06602, Pf12578	10903	ENSG00000014914	MTMR11	A4FU01; B3KUE4; B4DJI6; B4DQF5; B4E3Q6; hsa:10903; Q3ZCP7; Q5SZ62; Q6P2Q8; Q99752; Q99753			0	0
High	Master Protein	A0A3B3ISD1	Fibroblast growth factor receptor OS=Homo sapiens OX=9606 GN=FGFR1 PE=1 SV=1	0	FALSE	12.359	7	4	6	2	818	91.3	6.15	14.89	4	protein metabolism;other metabolic processes;signal transduction;other biological processes	plasma membrane;other membranes;cytosol;nucleus;other cell component	kinase activity;other molecular function	Pf00047, Pf07679, Pf07714	2260	ENSG00000077782	FGFR1	A0A3B3ISD1		Neural crest differentiation; Glioblastoma signaling pathways; Mesodermal commitment pathway; Mesodermal commitment pathway; MAPK signaling pathway; Embryonic stem cell pluripotency pathways; Focal adhesion: PI3K-Akt-mTOR-signaling pathway; Prion disease pathway; Endometrial cancer; PI3K-Akt signaling pathway; Ras signaling; Breast cancer pathway; Thermogenesis; Hippo signaling regulation pathway…	24	1	0.897	0.824	1.065	0.722	0.852	0.894	0.67	0.522	0.539	0.527	0.459	0.616	0.622	0.636	0.744	0.919	1.188	0.805	0.95	0.997	0.748	0.582
High	Master Protein	A0A3B3ISF0	La-related protein 1B OS=Homo sapiens OX=9606 GN=LARP1B PE=1 SV=1	0	FALSE	20.962	6	7	9	3	1115	126.1	7.87	19.03	7			nucleic acid binding activity	Pf05383	55132	ENSG00000138709	LARP1B	A0A3B3ISF0			0	0	0.854	1.042	1.221	0.571	1.029	0.905	0.796	1.13	1.31	1.572	1.262	0.818	1.123	0.86	0.906	1.22	1.43	0.668	1.205	1.06	0.932	1.323
High	Master Protein	F8WF27	Transmembrane 4 L6 family member 1 OS=Homo sapiens OX=9606 GN=TM4SF1 PE=1 SV=1	0	FALSE	6.557	9	1	6	1	101	11	7.58	16.96	1		other membranes		Pf05805		ENSG00000169908	TM4SF1	F8WF27			0	0	0.981	0.847	1.004	0.871	1.53	1.812	1.363	0.88	0.569	1.788	0.806	1.185	1.263	0.914	0.886	0.863	1.023	0.888	1.559	1.847	1.389	0.897
High	Master Protein	O75964	ATP synthase subunit g, mitochondrial OS=Homo sapiens OX=9606 GN=ATP5MG PE=1 SV=3	0	FALSE	34.095	82	7	21	7	103	11.4	9.64	59.87	7	cell organization and biogenesis;other metabolic processes;transport	other membranes;mitochondrion	transporter activity	Pf04718	10632	ENSG00000167283	ATP5MG	A8K0K3; hsa:10632; O75964; Q96BV6; Q9UBZ7	Cristae formation; Formation of ATP by chemiosmotic coupling	Electron transport chain: OXPHOS system in mitochondria; Oxidative phosphorylation	4	0	0.992	1.13	0.877	1.02	1.083	1.12	1.12	0.741	0.794	0.767	0.781	0.766	0.802	0.815	0.9	1.139	0.884	1.028	1.092	1.128	1.129	0.747
High	Master Protein	Q9NS18	Glutaredoxin-2, mitochondrial OS=Homo sapiens OX=9606 GN=GLRX2 PE=1 SV=1	0	FALSE	5.753	7	1	1	1	164	18	9.11	3.86	1	DNA metabolism;other metabolic processes;stress response;other biological processes	mitochondrion;nucleus;other cell component	other molecular function	Pf00462	51022	ENSG00000023572	GLRX2	hsa:51022; Q3LR69; Q7L1N7; Q96JC0; Q9NS18; Q9Y3D4			0	0
High	Master Protein	Q9H4Z3	mRNA (2'-O-methyladenosine-N(6)-)-methyltransferase OS=Homo sapiens OX=9606 GN=PCIF1 PE=1 SV=1	0	FALSE	4.778	3	2	2	2	704	80.6	7.42	5	2	RNA metabolism OR transcription;other metabolic processes;other biological processes	non-structural extracellular;cytoskeleton;nucleus	other molecular function	Pf00397, Pf12237	63935	ENSG00000100982	PCIF1	E1P5P1; hsa:63935; Q54AB9; Q9H4Z3; Q9NT85			0	0	1.269	0.935	1.597	0.935	1.271	1.093	1.071	1.799	1.523	0.881	1.59	2.397	1.669	1.749	1.487	0.736	1.258	0.736	1.002	0.861	0.844	1.418
High	Master Protein	Q01085	Nucleolysin TIAR OS=Homo sapiens OX=9606 GN=TIAL1 PE=1 SV=1	0	FALSE	28.754	17	6	16	4	375	41.6	7.74	42.4	6	stress response;signal transduction;other biological processes	nucleus;other cytoplasmic organelle;other cell component	nucleic acid binding activity	Pf00076	7073	ENSG00000151923	TIAL1	A8K3T0; A8K4L9; hsa:7073; Q01085	FGFR2 alternative splicing		1	1	1.085	1.081	0.927	1.191	0.963	0.98	0.914	1.081	1.045	1.132	1.195	1.177	1.09	0.845	1.066	0.997	0.854	1.098	0.888	0.904	0.843	0.996
High	Master Protein	Q99567	Nuclear pore complex protein Nup88 OS=Homo sapiens OX=9606 GN=NUP88 PE=1 SV=2	0	FALSE	40.833	18	10	21	6	741	83.5	5.69	63.63	10	cell cycle OR cell proliferation;protein metabolism;other metabolic processes;transport;other biological processes	cytosol;nucleus;other cell component	transporter activity;other molecular function	Pf10168	4927	ENSG00000108559	NUP88	D3DTM2; hsa:4927; Q99567; Q9BWE5	ISG15 antiviral mechanism; NS1 Mediated Effects on Host Pathways; tRNA processing in the nucleus; HCMV Early Events; SUMOylation of DNA replication proteins; Viral Messenger RNA Synthesis; Transcriptional regulation by small RNAs; SUMOylation of DNA damage response and repair proteins; Transport of Mature mRNA derived from an Intron-Containing Transcript; Regulation of HSF1-mediated heat shock re…	Ciliary landscape	28	2	1.099	1.183	1.454	1.009	1.163	1.223	1.151	1.726	1.551	1.637	1.708	1.986	1.701	1.858	1.921	1.077	1.323	0.918	1.058	1.113	1.048	1.571
High	Master Protein	Q9UNS1	Protein timeless homolog OS=Homo sapiens OX=9606 GN=TIMELESS PE=1 SV=2	0	FALSE	33.413	13	10	10	10	1208	138.6	5.4	23.21	10	cell cycle OR cell proliferation;DNA metabolism;other metabolic processes;stress response;developmental processes;signal transduction;other biological processes	nucleus;other cell component	nucleic acid binding activity	Pf04821, Pf05029	8914	ENSG00000111602	TIMELESS	B2ZAV0; hsa:8914; O94802; Q86VM1; Q8IWH3; Q9UNS1	Processing of DNA double-strand break ends		1	0	1.66	1.438	1.084	1.063	0.792	0.66	0.966	3.348	2.421	2.792	2.733	3.175	2.034	2.959	2.063	0.866	0.653	0.64	0.477	0.397	0.582	2.016
High	Master Protein	Q8IWZ3	Ankyrin repeat and KH domain-containing protein 1 OS=Homo sapiens OX=9606 GN=ANKHD1 PE=1 SV=1	0	FALSE	61.642	8	14	19	4	2542	269.3	5.73	53.09	14	stress response	other cell component		Pf00013, Pf12796	404734; 54882	ENSG00000131503	ANKHD1	A6NH85; hsa:404734; hsa:54882; Q149P2; Q8IWZ2; Q8IWZ3; Q8WY90; Q96G77; Q96GK0; Q9H2U0; Q9HA95; Q9NWG4; Q9UPR7			0	3	1.06	1.009	1.021	0.947	0.982	0.796	0.935	1.287	1.379	1.286	1.363	1.104	1.225	1.119	1.112	0.952	0.963	0.894	0.927	0.751	0.882	1.214
High	Master Protein	Q14554	Protein disulfide-isomerase A5 OS=Homo sapiens OX=9606 GN=PDIA5 PE=1 SV=1	0	FALSE	50.149	39	12	20	12	519	59.6	7.91	60.15	12	other metabolic processes;stress response;signal transduction;other biological processes	other membranes;ER/Golgi	other molecular function	Pf00085	10954	ENSG00000065485	PDIA5	D3DN95; hsa:10954; Q14554; Q9BV43	XBP1(S) activates chaperone genes		1	0	0.99	0.965	1.514	0.905	1.237	1.203	1.123	0.622	0.625	0.667	0.648	1.251	1.189	1.36	1.377	0.975	1.529	0.914	1.249	1.215	1.134	0.628
High	Master Protein	Q96HP0	Dedicator of cytokinesis protein 6 OS=Homo sapiens OX=9606 GN=DOCK6 PE=1 SV=3	0	FALSE	57.072	9	15	26	13	2047	229.4	6.74	70.18	15	stress response;signal transduction	cytosol;other cell component	enzyme regulator activity	Pf06920, Pf11878, Pf14429	57572	ENSG00000130158	DOCK6	A6H8X5; hsa:57572; Q7Z7P4; Q96HP0; Q9P2F2	Factors involved in megakaryocyte development and platelet production; RAC1 GTPase cycle; CDC42 GTPase cycle		3	0	1.014	1.013	1.555	0.838	0.933	0.892	0.917	1.501	1.495	1.455	1.469	1.822	1.829	1.991	1.751	0.999	1.534	0.826	0.92	0.88	0.904	1.48
High	Master Protein	H0Y547	Phospholipid-transporting ATPase (Fragment) OS=Homo sapiens OX=9606 GN=ATP11A PE=1 SV=1	0	FALSE	11.89	6	5	6	5	935	106.6	6.42	12.44	5	cell organization and biogenesis;transport	other membranes;other cell component	transporter activity;other molecular function	Pf00122, Pf13246, Pf16209, Pf16212		ENSG00000068650	ATP11A	H0Y547		Lung fibrosis	1	0	1.013	1.025	1.085	0.648	0.876	0.701	0.802	0.407	0.424	0.555	0.411	0.763	0.76	0.736	0.683	1.012	1.071	0.64	0.865	0.692	0.792	0.401
High	Master Protein	Q96C36	Pyrroline-5-carboxylate reductase 2 OS=Homo sapiens OX=9606 GN=PYCR2 PE=1 SV=1	0	FALSE	45.757	40	10	19	9	320	33.6	7.77	45.3	10	other metabolic processes;stress response	mitochondrion	other molecular function	Pf03807, Pf14748	29920	ENSG00000143811	PYCR2	A8K798; hsa:29920; Q7Z515; Q96C36; Q9Y5J4	Glutamate and glutamine metabolism	Metabolic reprogramming in colon cancer	2	0	0.893	1.073	0.848	0.999	1.088	1.232	1.241	1.018	1.078	0.975	0.99	1.149	1.122	1.28	1.202	1.202	0.949	1.118	1.218	1.379	1.39	1.139
Medium	Master Protein	F5GX71	Mannose-6-phosphate isomerase OS=Homo sapiens OX=9606 GN=MPI PE=1 SV=1	0.041	FALSE	1.32	3	1	1	1	373	41.2	6.09	2.63	1	other metabolic processes		other molecular function	Pf01238	4351	ENSG00000178802	MPI	F5GX71			0	0	1.02	1.089	0.939	0.537	0.912	0.96	0.786	0.627	0.849	0.778	0.796	0.756	0.866	0.772	0.885	1.067	0.92	0.526	0.894	0.941	0.771	0.614
High	Master Protein	Q5T1J5	Putative coiled-coil-helix-coiled-coil-helix domain-containing protein CHCHD2P9, mitochondrial OS=Homo sapiens OX=9606 GN=CHCHD2P9 PE=5 SV=1	0.001	FALSE	4.098	9	1	1	1	151	15.5	9.89	2.75	1	cell organization and biogenesis;other biological processes	mitochondrion;nucleus	nucleic acid binding activity				CHCHD2P9	Q5T1J5			0	0	0.905	0.999	0.893	0.767	1.234	1.356	1.277	0.883	0.925	0.568	0.823	0.58	0.788	0.596	0.88	1.105	0.987	0.848	1.363	1.499	1.411	0.976
High	Master Protein	Q8IZT6	Abnormal spindle-like microcephaly-associated protein OS=Homo sapiens OX=9606 GN=ASPM PE=1 SV=2	0	FALSE	35.896	3	9	15	9	3477	409.5	10.45	42.83	9	cell cycle OR cell proliferation;cell organization and biogenesis;other biological processes	cytoskeleton;nucleus;other cell component	other molecular function	Pf00307, Pf00612, Pf15780	259266	ENSG00000066279	ASPM	hsa:259266; Q4G1H1; Q5VYL3; Q86UX4; Q8IUL2; Q8IZJ7; Q8IZJ8; Q8IZJ9; Q8IZT6; Q8N4D1; Q9NVS1; Q9NVT6			0	0	1.23	1.165	1.045	1.504	1.068	1.15	1.104	1.814	1.803	1.768	1.866	1.392	1.49	1.458	1.657	0.947	0.85	1.222	0.868	0.935	0.897	1.474
High	Master Protein	Q9UBH6	Xenotropic and polytropic retrovirus receptor 1 OS=Homo sapiens OX=9606 GN=XPR1 PE=1 SV=1	0	FALSE	38.132	18	8	15	8	696	81.5	8.44	41.52	8	stress response;transport;signal transduction;other biological processes	plasma membrane;other membranes;ER/Golgi;other cell component	transporter activity;other molecular function	Pf03105, Pf03124	9213	ENSG00000143324	XPR1	hsa:9213; O95719; Q7L8K9; Q8IW20; Q9NT19; Q9UBH6; Q9UFB9			0	0	1.102	1.361	1.212	0.875	1.249	1.158	1.176	0.811	1.121	0.927	1.058	0.969	0.801	0.935	0.798	1.235	1.1	0.794	1.133	1.051	1.067	0.736
High	Master Protein	O43581	Synaptotagmin-7 OS=Homo sapiens OX=9606 GN=SYT7 PE=1 SV=3	0	FALSE	4.889	5	1	1	1	403	45.5	9.22	3.86	1	cell-cell signaling;cell organization and biogenesis;stress response;transport;other biological processes	plasma membrane;other membranes;cytosol;ER/Golgi;other cytoplasmic organelle;other cell component	other molecular function	Pf00168	9066	ENSG00000011347	SYT7	F5GZC2; F5GZU9; F5H126; F5H1N2; F5H6C1; hsa:9066; O43581; Q08AH6	Neurexins and neuroligins		1	0
High	Master Protein	Q9BZ95	Histone-lysine N-methyltransferase NSD3 OS=Homo sapiens OX=9606 GN=NSD3 PE=1 SV=1	0	FALSE	12.743	3	4	7	4	1437	161.5	8.21	15.6	4	protein metabolism;other metabolic processes;other biological processes	nucleus;other cell component	other molecular function	Pf00855, Pf00856, Pf17907, Pf17982	54904	ENSG00000147548	NSD3	B7ZL11; D3DSX1; hsa:54904; Q1RMD3; Q3B796; Q6ZSA5; Q9BYU8; Q9BYU9; Q9BZ95; Q9H2M8; Q9H9W9; Q9NXA6	PKMTs methylate histone lysines		1	0
High	Master Protein	Q8IZH2	5'-3' exoribonuclease 1 OS=Homo sapiens OX=9606 GN=XRN1 PE=1 SV=1	0	FALSE	50.766	10	13	20	13	1706	194	7.21	54.23	13	RNA metabolism OR transcription;other metabolic processes;other biological processes	plasma membrane;other membranes;cytosol;nucleus;other cell component	nucleic acid binding activity;other molecular function	Pf03159, Pf17846, Pf18129, Pf18332, Pf18334	54464	ENSG00000114127	XRN1	hsa:54464; Q4G0S3; Q68D88; Q6AI24; Q6MZS8; Q86WS7; Q8IZH2; Q8N8U4; Q9UF39	mRNA decay by 5' to 3' exoribonuclease; Tristetraprolin (TTP, ZFP36) binds and destabilizes mRNA; Butyrate Response Factor 1 (BRF1) binds and destabilizes mRNA		3	0	1.094	1.098	1.467	0.87	1.152	0.994	0.953	1.641	1.603	1.606	1.668	1.77	1.652	1.841	1.876	1.004	1.341	0.796	1.053	0.908	0.871	1.5
High	Master Protein	Q9BY44	Eukaryotic translation initiation factor 2A OS=Homo sapiens OX=9606 GN=EIF2A PE=1 SV=3	0	FALSE	116.968	53	23	52	23	585	64.9	8.87	147.83	23	cell organization and biogenesis;protein metabolism;other metabolic processes;stress response;signal transduction;other biological processes	cytosol;translational apparatus;other cell component	translation activity;nucleic acid binding activity	Pf08662	83939	ENSG00000144895	EIF2A	A8MPS6; B4DF96; B4DQ14; D3DNI9; hsa:83939; Q5QTR2; Q7Z4E9; Q8NFM1; Q96EW9; Q96K81; Q9BY44		Photodynamic therapy-induced unfolded protein response; VEGFA-VEGFR2 signaling pathway; 7q11.23 copy number variation syndrome	3	0	1.061	1.077	0.835	1.015	0.923	0.882	0.932	1.13	1.114	1.162	1.091	1.285	1.308	1.39	1.298	1.015	0.787	0.956	0.87	0.831	0.879	1.065
High	Master Protein	Q9BQA1	Methylosome protein 50 OS=Homo sapiens OX=9606 GN=WDR77 PE=1 SV=1	0	FALSE	12.437	10	3	7	3	342	36.7	5.17	20.34	3	cell organization and biogenesis;RNA metabolism OR transcription;other metabolic processes;developmental processes;other biological processes	cytosol;ER/Golgi;nucleus;other cell component	nucleic acid binding activity;other molecular function	Pf00400	79084	ENSG00000116455	WDR77	B3KMW6; B4DP38; hsa:79084; Q3LID2; Q53FU2; Q6JZZ5; Q96GK4; Q9BQA1; Q9BWY3	RMTs methylate histone arginines; snRNP Assembly		2	0	1.138	0.89	0.834	0.567	0.954	0.867	0.891	1.293	1.321	1.082	1.114	0.919	1.198	1.068	0.891	0.782	0.733	0.498	0.838	0.761	0.782	1.136
High	Master Protein	Q86X55	Histone-arginine methyltransferase CARM1 OS=Homo sapiens OX=9606 GN=CARM1 PE=1 SV=3	0	FALSE	22.763	15	7	15	7	608	65.8	6.73	41.58	7	cell cycle OR cell proliferation;protein metabolism;other metabolic processes;stress response;signal transduction;other biological processes	cytosol;nucleus;other cell component	nucleic acid binding activity;other molecular function	Pf06325, Pf11531	10498	ENSG00000142453	CARM1	A6NN38; hsa:10498; Q86X55	PPARA activates gene expression; Heme signaling; BMAL1:CLOCK,NPAS2 activates circadian gene expression; Estrogen-dependent gene expression; Cytoprotection by HMOX1; RMTs methylate histone arginines; Transcriptional regulation of white adipocyte differentiation; Transcriptional activation of mitochondrial biogenesis; Activation of gene expression by SREBF (SREBP); TP53 Regulates Transcription of G…	Androgen receptor signaling pathway; Nitric oxide metabolism in cystic fibrosis	15	0	1.318	1.157	1.061	0.599	1.105	1.027	1.245	3.107	2.858	2.426	2.985	2.028	1.52	1.649	1.268	0.878	0.805	0.454	0.838	0.779	0.945	2.357
High	Master Protein	P28074	Proteasome subunit beta type-5 OS=Homo sapiens OX=9606 GN=PSMB5 PE=1 SV=3	0	FALSE	39.441	27	7	16	7	263	28.5	6.92	45.38	7	cell-cell signaling;cell organization and biogenesis;protein metabolism;other metabolic processes;stress response;transport;signal transduction;other biological processes	cytosol;cytoskeleton;nucleus;other cell component	other molecular function	Pf00227	5693	ENSG00000100804	PSMB5	B2R4N9; B4DUM9; D3DS43; E9PAV2; hsa:5693; P28074; Q16242; Q6PEW2; Q7Z3B5; Q86T01; Q9TNN9	Asymmetric localization of PCP proteins; Degradation of DVL; ER-Phagosome pathway; Regulation of expression of SLITs and ROBOs; MAPK6/MAPK4 signaling; Separation of Sister Chromatids; The role of GTSE1 in G2/M progression after G2 checkpoint; RUNX1 regulates transcription of genes involved in differentiation of HSCs; Cdc20:Phospho-APC/C mediated degradation of Cyclin A; Ub-specific processing pro…	Proteasome degradation; Alzheimer's disease and miRNA effects; Alzheimer's disease	60	0	1.022	1.118	1.153	0.694	1.053	1.008	1.047	1.387	1.346	1.343	1.379	0.984	1.061	1.067	0.947	1.094	1.129	0.68	1.031	0.987	1.025	1.358
High	Master Protein	D6RB94	WD repeat-containing protein 41 OS=Homo sapiens OX=9606 GN=WDR41 PE=1 SV=1	0.001	FALSE	4.328	7	1	1	1	151	16.9	6.54	2.59	1	other biological processes			Pf00400		ENSG00000164253	WDR41	D6RB94			0	0
High	Master Protein	E5RJR1	Multiple C2 and transmembrane domain-containing protein 1 (Fragment) OS=Homo sapiens OX=9606 GN=MCTP1 PE=1 SV=1	0	FALSE	4.788	2	1	1	1	489	56.2	7.94	2.18	1				Pf00168		ENSG00000175471	MCTP1	E5RJR1			0	0
High	Master Protein	O60503	Adenylate cyclase type 9 OS=Homo sapiens OX=9606 GN=ADCY9 PE=1 SV=4	0	FALSE	25.911	7	8	11	8	1353	150.6	7.34	22.92	8	other metabolic processes;developmental processes;signal transduction;other biological processes	plasma membrane;other membranes;other cell component	other molecular function	Pf00211	115	ENSG00000162104	ADCY9	A7E2V5; A7E2X2; D3DUD1; hsa:115; O60273; O60503; Q4ZHT9; Q4ZIR5; Q9BWT4; Q9UGP2	G alpha (i) signalling events; G alpha (z) signalling events; Adenylate cyclase inhibitory pathway; G alpha (s) signalling events; ADORA2B mediated anti-inflammatory cytokines production; FCGR3A-mediated IL10 synthesis; Vasopressin regulates renal water homeostasis via Aquaporins; PKA activation; PKA activation in glucagon signalling; Adenylate cyclase activating pathway; Hedgehog 'off' state	Myometrial relaxation and contraction pathways; G protein signaling pathways; Chemokine signaling pathway; Phosphodiesterases in neuronal function; Thermogenesis; Envelope proteins and their potential roles in EDMD physiopathology; Calcium regulation in cardiac cells	19	0	1.015	1.161	1.05	1.006	0.868	1.036	0.925	1.171	1.151	1.17	1.088	0.98	1.185	1.343	1.308	1.143	1.034	0.991	0.854	1.021	0.911	1.153
High	Master Protein	Q5T370	Arrestin domain-containing protein 1 (Fragment) OS=Homo sapiens OX=9606 GN=ARRDC1 PE=1 SV=1	0.002	FALSE	2.919	4	1	1	1	271	29.2	8.69	2.19	1				Pf00339, Pf02752		ENSG00000197070	ARRDC1	Q5T370			0	0	1.04	0.902	0.935	2.211	1.959	1.61	1.63	1.188	1.373	1.337	1.228	1.572	1.968	1.773	1.542	0.867	0.899	2.126	1.884	1.548	1.568	1.142
High	Master Protein	Q9ULH1	Arf-GAP with SH3 domain, ANK repeat and PH domain-containing protein 1 OS=Homo sapiens OX=9606 GN=ASAP1 PE=1 SV=4	0	FALSE	40.063	14	11	18	11	1129	125.4	7.31	51.34	11	cell organization and biogenesis;other biological processes	plasma membrane;other membranes;cytosol;cytoskeleton;other cell component	enzyme regulator activity;other molecular function	Pf00169, Pf01412, Pf12796, Pf14604, Pf16746	50807	ENSG00000153317	ASAP1	B2RNV3; hsa:50807; Q9ULH1	VxPx cargo-targeting to cilium	EGF/EGFR signaling pathway; CCL18 signaling pathway	3	0	1.026	1.039	0.978	1.456	0.948	0.887	0.904	1.356	1.351	1.276	1.209	1.459	1.121	1.418	1.167	1.013	0.953	1.419	0.924	0.864	0.881	1.322
High	Master Protein	P17677	Neuromodulin OS=Homo sapiens OX=9606 GN=GAP43 PE=1 SV=1	0	FALSE	8.664	9	2	3	2	238	24.8	4.72	9.62	2	cell organization and biogenesis;stress response;developmental processes;signal transduction;other biological processes	plasma membrane;other membranes;other cell component	other molecular function	Pf00612, Pf06614, Pf10580	2596	ENSG00000172020	GAP43	A8K0Y4; hsa:2596; P17677	L1CAM interactions	Glial cell differentiation; Spinal cord injury	3	0
High	Master Protein	Q9UPP5	AP2-interacting clathrin-endocytosis protein OS=Homo sapiens OX=9606 GN=KIAA1107 PE=1 SV=3	0	FALSE	7.302	1	1	1	1	1279	140.8	6.33	3.47	1	cell organization and biogenesis;transport;developmental processes	ER/Golgi;other cell component		Pf15363	284697		KIAA1107	A0A1B0GWG1; hsa:284697; O14767; Q8N3X7; Q9UPP5			0	0
High	Master Protein	H0Y4W3	Intermediate filament family orphan 2 (Fragment) OS=Homo sapiens OX=9606 GN=IFFO2 PE=1 SV=1	0	FALSE	6.713	10	1	1	1	259	30.2	4.49	4.29	1		cytoskeleton		Pf00038		ENSG00000169991	IFFO2	H0Y4W3			0	0
High	Master Protein	H7C4C5	Microtubule-associated protein (Fragment) OS=Homo sapiens OX=9606 GN=MAP4 PE=1 SV=1	0	FALSE	63.208	29	12	25	1	493	50.9	10.21	63.21	12	cell organization and biogenesis	cytoskeleton;other cell component	cytoskeletal activity	Pf00418		ENSG00000047849	MAP4	H7C4C5		Splicing factor NOVA regulated synaptic proteins	1	0	1.118	0.988	0.96	1.098	1.335	1.285	1.083	1.481	1.314	1.226	1.454	1.387	1.233	1.143	1.374	0.883	0.859	0.982	1.194	1.15	0.969	1.325
High	Master Protein	Q9NZI8	Insulin-like growth factor 2 mRNA-binding protein 1 OS=Homo sapiens OX=9606 GN=IGF2BP1 PE=1 SV=2	0	FALSE	143.716	54	29	77	25	577	63.4	9.2	211.41	29	cell cycle OR cell proliferation;cell organization and biogenesis;stress response;transport;developmental processes;other biological processes	cytosol;nucleus;other cell component	nucleic acid binding activity;other molecular function	Pf00013, Pf00076	10642	ENSG00000159217	IGF2BP1	C9JT33; hsa:10642; Q9NZI8	MAPK6/MAPK4 signaling; Insulin-like Growth Factor-2 mRNA Binding Proteins (IGF2BPs/IMPs/VICKZs) bind RNA	Brain-derived neurotrophic factor (BDNF) signaling pathway; eIF5A regulation in response to inhibition of the nuclear export system	4	2	1.025	1.004	0.99	1.188	1.191	1.083	1.169	1.229	1.183	1.189	1.242	1.535	1.398	1.621	1.499	0.98	0.966	1.159	1.162	1.056	1.14	1.198
High	Master Protein	P01889	HLA class I histocompatibility antigen, B alpha chain OS=Homo sapiens OX=9606 GN=HLA-B PE=1 SV=3	0	FALSE	36.514	30	8	25	1	362	40.4	5.85	67.81	8	stress response;transport;signal transduction;other biological processes	plasma membrane;other membranes;ER/Golgi;other cytoplasmic organelle;other cell component	signal transduction activity or receptor binding;other molecular function	Pf00129, Pf06623, Pf07654	3106	ENSG00000234745	HLA-B	A0A2I6Q7B5; B0V0B8; G3GN01; hsa:3106; O02862; O02956; O02957; O02960; O19555; O19556; O19595; O19615; O19624; O19625; O19627; O19641; O19651; O19675; O19692; O19758; O19779; O19783; O46702; O62897; O62901; O62915; O62917; O62919; O77933; O77959; O78053; O78138; O78160; O78163; O78172; O78173; O78180; O78217; O95730; O98140; P01889; P01890; P03989; P10317; P10318; P10319; P10320; P18463; P18464; P…	DAP12 interactions; Neutrophil degranulation; Immunoregulatory interactions between a Lymphoid and a non-Lymphoid cell; ER-Phagosome pathway; Interferon gamma signaling; Interferon alpha/beta signaling; Antigen Presentation: Folding, assembly and peptide loading of class I MHC; Endosomal/Vacuolar pathway	Proteasome degradation; Allograft Rejection; Ebola virus pathway in host; Type II interferon signaling (IFNG)	12	5	0.926	0.924	1.319	0.848	1.058	0.967	0.924	0.555	0.634	0.568	0.539	0.571	0.57	0.594	0.606	0.998	1.424	0.916	1.142	1.044	0.997	0.599
High	Master Protein	Q9UL01	Dermatan-sulfate epimerase OS=Homo sapiens OX=9606 GN=DSE PE=1 SV=1	0	FALSE	22.474	8	7	11	7	958	109.7	8.09	25.63	7	protein metabolism;other metabolic processes	other membranes;ER/Golgi	other molecular function	Pf16332	29940	ENSG00000111817	DSE	hsa:29940; Q5R3K6; Q9UL01	Dermatan sulfate biosynthesis		1	0	0.936	1.032	1.114	0.986	1.502	1.427	1.244	0.691	0.643	0.714	0.747	1.071	0.865	1.146	1.142	1.103	1.191	1.053	1.605	1.525	1.329	0.739
High	Master Protein	Q5H909	Melanoma-associated antigen D2 OS=Homo sapiens OX=9606 GN=MAGED2 PE=1 SV=2	0	FALSE	51.507	27	11	29	10	588	63.1	9.35	82.43	11		cytosol;nucleus		Pf01454		ENSG00000102316	MAGED2	Q5H909			0	1	1.292	1.281	1.36	0.911	1.331	1.184	1.23	1.931	1.811	1.934	1.969	1.684	1.321	1.681	1.345	0.992	1.052	0.705	1.03	0.917	0.952	1.494
High	Master Protein	Q96Q11	CCA tRNA nucleotidyltransferase 1, mitochondrial OS=Homo sapiens OX=9606 GN=TRNT1 PE=1 SV=2	0	FALSE	35.407	31	11	18	11	434	50.1	8.1	41.05	11	RNA metabolism OR transcription;other metabolic processes	mitochondrion;nucleus	nucleic acid binding activity;other molecular function	Pf01743, Pf12627	51095	ENSG00000072756	TRNT1	A8K2Z6; B7WP13; C9JKA2; hsa:51095; Q8ND57; Q96Q11; Q9BS97; Q9Y362	tRNA processing in the nucleus; tRNA processing in the mitochondrion		2	0	0.779	0.941	0.835	1.603	1.369	1.561	1.55	1.081	1.431	1.289	1.292	0.952	1.333	1.202	1.367	1.207	1.072	2.057	1.757	2.003	1.988	1.386
High	Master Protein	O60565	Gremlin-1 OS=Homo sapiens OX=9606 GN=GREM1 PE=1 SV=1	0	FALSE	17.366	28	3	6	3	184	20.7	9.39	24.42	3	cell-cell signaling;cell organization and biogenesis;developmental processes;signal transduction;other biological processes	non-structural extracellular;other cell component	signal transduction activity or receptor binding;enzyme regulator activity;other molecular function	Pf03045	26585	ENSG00000166923; ENSG00000276886; ENSG00000282046	GREM1	hsa:26585; O60565; Q52LV3; Q8N914; Q8N936		Lung fibrosis; Canonical and non-canonical TGF-B signaling; GDNF/RET signaling axis; Development of ureteric collection system	4	0
High	Master Protein	D6RDU4	Progestin and adipoQ receptor family member 3 OS=Homo sapiens OX=9606 GN=PAQR3 PE=1 SV=1	0.001	FALSE	3.609	15	1	3	1	68	8.2	9.8	7.14	1		other membranes				ENSG00000163291	PAQR3	D6RDU4			0	0
High	Master Protein	B8ZZV5	39S ribosomal protein L30, mitochondrial OS=Homo sapiens OX=9606 GN=MRPL30 PE=1 SV=1	0	FALSE	7.962	27	3	3	3	101	11.9	9.86	9.26	3	protein metabolism;other metabolic processes	translational apparatus	other molecular function	Pf00327		ENSG00000185414	MRPL30	B8ZZV5			0	0	0.889	1.112	0.725	1.357	1.371	1.402	1.435	0.762	0.878	0.808	0.851	0.715	0.822	0.785	0.953	1.251	0.816	1.527	1.542	1.577	1.615	0.857
High	Master Protein	Q04771	Activin receptor type-1 OS=Homo sapiens OX=9606 GN=ACVR1 PE=1 SV=1	0	FALSE	12.521	14	4	4	4	509	57.1	7.33	8.82	4	cell adhesion;cell cycle OR cell proliferation;protein metabolism;other metabolic processes;stress response;developmental processes;signal transduction;other biological processes	plasma membrane;other membranes;other cell component	kinase activity;other molecular function	Pf01064, Pf07714, Pf08515	90	ENSG00000115170	ACVR1	hsa:90; Q04771		Mesodermal commitment pathway; Mesodermal commitment pathway; Embryonic stem cell pluripotency pathways	3	0	0.982	0.858	1.009	0.943	1.351	1.093	1.156	0.676	0.761	0.704	0.696	0.767	0.825	0.576	0.751	0.873	1.028	0.96	1.376	1.112	1.177	0.688
High	Master Protein	P98194	Calcium-transporting ATPase type 2C member 1 OS=Homo sapiens OX=9606 GN=ATP2C1 PE=1 SV=3	0	FALSE	121.782	32	22	54	22	919	100.5	6.74	158.87	22	cell adhesion;cell organization and biogenesis;transport;other biological processes	plasma membrane;other membranes;ER/Golgi	transporter activity;other molecular function	Pf00122, Pf00689, Pf00690, Pf00702	27032	ENSG00000017260	ATP2C1	B2RAT7; B4DSW3; B7Z3X9; G3XAH8; G8JLN9; hsa:27032; O76005; P98194; Q86V72; Q86V73; Q8N6V1; Q8NCJ7	Ion transport by P-type ATPases		1	0	1.014	0.96	1.062	0.921	0.991	0.965	1.049	0.642	0.637	0.57	0.651	0.871	0.85	0.93	1.005	0.946	1.047	0.908	0.978	0.951	1.034	0.633
High	Master Protein	Q7Z794	Keratin, type II cytoskeletal 1b OS=Homo sapiens OX=9606 GN=KRT77 PE=2 SV=3	0	FALSE	9.535	7	4	5	1	578	61.9	5.99	11.64	4	developmental processes	cytosol;cytoskeleton		Pf00038, Pf16208	374454	ENSG00000189182	KRT77	hsa:374454; Q7RTS8; Q7Z794	Formation of the cornified envelope		2	0
High	Master Protein	Q8TAQ2	SWI/SNF complex subunit SMARCC2 OS=Homo sapiens OX=9606 GN=SMARCC2 PE=1 SV=1	0	FALSE	113.896	27	28	55	22	1214	132.8	5.69	148.9	28	cell organization and biogenesis;developmental processes;other biological processes	nucleus	other molecular function	Pf00249, Pf04433, Pf16495, Pf16496, Pf16498	6601	ENSG00000139613	SMARCC2	F8VTJ5; hsa:6601; Q59GV3; Q8TAQ2; Q92923; Q96E12; Q96GY4	RMTs methylate histone arginines; RUNX1 interacts with co-factors whose precise effect on RUNX1 targets is not known	Tumor suppressor activity of SMARCB1; Thermogenesis	4	4	0.958	1.08	1.218	0.541	0.527	0.53	0.507	1.002	0.969	1.044	1.07	1.317	1.189	1.003	1.347	1.127	1.271	0.565	0.55	0.553	0.529	1.046
High	Master Protein	A0A087X1U4	Methyl-CpG-binding protein 2 OS=Homo sapiens OX=9606 GN=MECP2 PE=1 SV=1	0	FALSE	13.213	17	4	7	4	324	34.9	10.07	16.95	4											0	0	1.011	0.979	0.91	0.885	1.155	1.044	1.131	1.68	1.589	1.428	1.699	1.829	1.648	1.653	1.763	0.968	0.9	0.875	1.143	1.033	1.119	1.662
High	Master Protein	Q96D05	Protein FAM241B OS=Homo sapiens OX=9606 GN=FAM241B PE=1 SV=1	0.001	FALSE	3.948	12	1	1	1	121	13.2	11.58	3.76	1		other membranes;other cell component		Pf15378	219738	ENSG00000171224	FAM241B	hsa:219738; Q96D05			0	0	0.996	1.172	1.145	0.887	0.618	0.96	1.009	0.949	1.131	0.944	1.119	1.121	1.195	1.39	1.143	1.177	1.151	0.891	0.621	0.965	1.013	0.954
[truncated: 7,584 more rows]
[truncated: 148 more columns]

## Sheet: processed_data
																	Biological information												Raw data																Normalized data
iid	Protein FDR Confidence: Combined	Master	Accession	Description	Exp. q-value: Combined	Contaminant	Sum PEP Score	Coverage [%]	# Peptides	# PSMs	# Unique Peptides	# AAs	MW [kDa]	calc. pI	Score Sequest HT: Sequest HT	# Peptides (by Search Engine): Sequest HT	Biological Process	Cellular Component	Molecular Function	Pfam IDs	Entrez Gene ID	Ensembl Gene ID	Gene Symbol	Gene ID	Reactome Pathways	WikiPathways	# Protein Pathway Groups	# Razor Peptides	Abundance: F1: 126, Sample	Abundance: F1: 127N, Sample	Abundance: F1: 127C, Sample	Abundance: F1: 128N, Sample	Abundance: F1: 128C, Sample	Abundance: F1: 129N, Sample	Abundance: F1: 129C, Sample	Abundance: F1: 130N, Sample	Abundance: F1: 130C, Sample	Abundance: F1: 131N, Sample	Abundance: F1: 131C, Sample	Abundance: F1: 132N, Sample	Abundance: F1: 132C, Sample	Abundance: F1: 133N, Sample	Abundance: F1: 133C, Sample	Abundance: F1: 134N, Sample	WT1	WT2	WT3	WT4	AB_1
[truncated: 8,315 more rows]
[truncated: 25 more columns]

## Sheet: MitoPathways
ID	Gene Symbol	Description	Synonyms	Maestro score	Evidence	Sub-compartment	Tissues	MitoPathways
[truncated: 1,796 more rows]

## Sheet: MitoCarta_GSEA_results
pathway	pval	padj	ES	NES	nMoreExtreme	size
Mitochondrial_central_dogma	1	1	0.121069	0.563938	6148	198
Mitochondrial_central_dogma.mtDNA_maintenance	0.728674	1	0.281602	0.820226	3971	18
[truncated: 138 more rows]
